# Supplementary material for: Palladium-catalyzed decarboxylative [2 + 3] cyclocarbonylation reactions of [60]fullerene: selective synthesis of [60]fullerene-fused 3-vinylcyclopentan-4-ones and cyclopentane-4-carbaldehydes
Source: Royal Society of Chemistry journal article supplement (doi:10.1039/d2qo01116f), 2022-01-01

## Electronic Supplementary Information

### **Palladium-catalyzed decarboxylative [2 + 3] cyclocarbonylation reactions of [60]fullerene: selective synthesis of [60]fullerene-fused 3-vinylcyclopentan-4-ones and cyclopentane-4-carbaldehydes**

Tong-Xin Liu,<sup>\*a,b</sup> Chuanjie Zhang,<sup>a</sup> Pengling Zhang,<sup>a</sup> Xin Wang,<sup>a</sup> Jinliang Ma,<sup>a</sup> and Guisheng Zhang<sup>\*a</sup>

<sup>a</sup>*Collaborative Innovation Center of Henan Province for Green Manufacturing of Fine Chemicals, Key Laboratory of Green Chemical Media and Reactions, Ministry of Education, School of Chemistry and Chemical Engineering, Henan Normal University, Xinxiang, Henan 453007, P. R. China.* <sup>b</sup>*Key Laboratory of Green and Precise Synthetic Chemistry and Applications, Ministry of Education, Huaibei Normal University, Huaibei, Anhui 235000, P. R. China.*

*E-mail: liutongxin\_0912@126.com and zgs@htu.cn*

## Table of Contents

|                                                                                                                |          |
|----------------------------------------------------------------------------------------------------------------|----------|
| 1. General Information                                                                                         | S3       |
| 2. Experimental Procedures                                                                                     | S4–S7    |
| 3. DEPT-135 Spectra of Compound <b>2a</b>                                                                      | S8       |
| 4. 2D-NOESY Spectra of Compounds <b>5a</b> , <b>5d</b> , <b>5i</b> , <i>cis</i> - and <i>trans</i> - <b>7g</b> | S9–S11   |
| 5. 1D-NOESY $^1\text{H}$ NMR of <b>5a</b> , <b>5d</b> , <b>5i</b> , <b>8a</b> and <b>9a</b>                    | S12–S15  |
| 6. UV–vis Spectra of Compounds <b>2</b> and <b>5</b>                                                           | S16–S30  |
| 7. CVs of Selected Compounds <b>2</b> and <b>5</b>                                                             | S31–S44  |
| 8. Spectral Data for All Compounds                                                                             | S45–S69  |
| 9. $^1\text{H}$ , $^{13}\text{C}$ and $^{19}\text{F}$ NMR Spectra of All Compounds                             | S70–S161 |

## 1. General Information

All reagents were purchased as reagent grade and used without further purification unless otherwise specified.  $\text{Pd}(\text{PPh}_3)_4$  and  $\text{Pd}(\text{OAc})_2/\text{bis-sulfoxide}$  (White's catalyst) were purchased from Sigma-Aldrich. Chlorobenzene (PhCl) and 1,2-Dichlorobenzene (ODCB) was treated with  $\text{CaH}_2$ . Substrates **1**<sup>1</sup> and **4**<sup>2</sup> were prepared by following the literature procedure.  $^1\text{H}$  NMR (400 and 600 MHz) and  $^{13}\text{C}$  NMR (150 MHz) were registered on Bruker 400 and 600 M spectrometers with tetramethylsilane (TMS) as internal standard. UV-vis Spectra were recorded on Shimadzu UV-1700. CVs were recorded on CHI 660E. FT-IR was registered on Perkin Elmer Spectrum 400F. HRMS were measured on Bruker Ultraflex extreme MALDI-TOF/TOF using *E*-2-[3-(4-*tert*-butylphenyl)-2-methyl-2-propenylidene]malononitrile (DCTB) as a matrix.

## References:

- (1) B. Yan, L. Zuo, X. Chang, T. Liu, M. Cui, Y. Liu, H. Sun, W. Chen and W. Guo, Kinetically controllable Pd-catalyzed decarboxylation enabled [5+2] and [3+2] cycloaddition toward carbocycles featuring quaternary carbons. *Org. Lett.*, 2021, **23**, 351.
- (2) R. Shintani, K. Moriya and T. Hayashi, Guiding the nitrogen nucleophile to the middle: palladium-catalyzed decarboxylative cyclopropanation of 2-alkylidenetrimethylene carbonates with isocyanates, *Chem. Commun.*, 2011, **47**, 3057.

## 2. Experimental Procedures

*General Procedure for the Synthesis of Products 2a–m:* A dry 15-mL tube equipped with a magnetic stirrer was charged with C<sub>60</sub> (36.0 mg, 0.05 mmol), **1** (0.10 mmol), Pd(PPh<sub>3</sub>)<sub>4</sub> (2.9 mg, 0.005 mmol). After dissolving the solids in anhydrous PhCl (6 mL) and DCM (1 mL) by sonication, the sealed tube was stirred in an oil bath preset at a designated temperature for a desired time. The reaction mixture was filtered through a silica gel plug to remove any insoluble material. After the solvent had been evaporated under vacuum, the residue was separated on a silica gel column with CS<sub>2</sub> as the eluent to recover unreacted C<sub>60</sub> and give product **2** (for **2b**, **2h**, **2m** and **2m'** with CS<sub>2</sub>/DCM as the eluent).

*General Procedure for the Synthesis of Products 2m':* A dry 15-mL tube equipped with a magnetic stirrer was charged with C<sub>60</sub> (36.0 mg, 0.05 mmol), **1m** (0.025 mmol, 10.1 mg), Pd(PPh<sub>3</sub>)<sub>4</sub> (5.8 mg, 0.005 mmol). After dissolving the solids in anhydrous PhCl (6 mL) and DCM (1 mL) by sonication, an oil bath at 70 °C for 9 h. The reaction mixture was filtered through a silica gel plug to remove any insoluble material. After the solvent had been evaporated under vacuum, the residue was separated on a silica gel column with CS<sub>2</sub>/DCM as the eluent to give unreacted C<sub>60</sub> (3.9 mg, 11%) and the product **2m'** (7.3 mg, 17%).

*General Procedure for the Synthesis of Products 5a–l:* A dry 15-mL tube equipped with a magnetic stirrer was charged with C<sub>60</sub> (36.0 mg, 0.05 mmol), **4** (0.15 mmol), Pd(OAc)<sub>2</sub>/bis-sulfoxide (0.005 mmol; 0.0075 mmol for **4b** and **4k**) and dppbz (0.01 mmol; 0.015 mmol for **4b** and **4k**). After dissolving the solids in anhydrous ODCB (4 mL) by sonication, the sealed tube was stirred in an oil bath preset at a designated temperature for a desired time. The reaction mixture was filtered through a silica gel

plug to remove any insoluble material. After the solvent had been evaporated under vacuum, the residue was separated on a silica gel column with CS<sub>2</sub> as the eluent to recover unreacted C<sub>60</sub>, and then the eluent was switched to CS<sub>2</sub>/DCM to give the product **5a-l**.

*Large-scale Synthesis of 2g:* A dry 250-mL round-bottomed flask equipped with a magnetic stirrer was charged with C<sub>60</sub> (720.0 mg, 1.0 mmol), **1g** (540.4 mg, 2.0 mmol), Pd(PPh<sub>3</sub>)<sub>4</sub> (115.6 mg, 0.1 mmol). After dissolving the solids in anhydrous PhCl (120 mL) and DCM (20 mL) by sonication, the round-bottomed flask was stirred in an oil bath at 50 °C for 11 h. The reaction mixture was filtered through a silica gel plug to remove any insoluble material. After the solvent had been evaporated under vacuum, the residue was separated on a silica gel column with CS<sub>2</sub> as the eluent to give unreacted C<sub>60</sub> (204.3 mg) and the product **2g** (520.2 mg, 55%).

*Large-scale Synthesis of 5a:* A dry 250-mL round-bottomed flask equipped with a magnetic stirrer was charged with C<sub>60</sub> (720.0 mg, 1.0 mmol), **4a** (570.6 mg, 3.0 mmol), Pd(OAc)<sub>2</sub>/bis-sulfoxide (50.3 mg, 0.1 mmol) and dppbz (89.3 mg, 0.2 mmol). After dissolving the solids in anhydrous ODCB (70 mL) by sonication, the round-bottomed flask was stirred in an oil bath at 110 °C for 20 h. The reaction mixture was filtered through a silica gel plug to remove any insoluble material. After the solvent had been evaporated under vacuum, the residue was separated on a silica gel column with CS<sub>2</sub> as the eluent to give unreacted C<sub>60</sub> (276.5 mg) and the product **5a** (424.2 mg, 49%).

*Synthetic Application for 7g:* A dry 15-mL tube equipped with a magnetic stirrer was charged with **2g** (38.4 mg, 0.04 mmol), BH<sub>3</sub>·NH<sub>3</sub> (4.9 mg, 0.16 mmol). After dissolving the solids in anhydrous PhCl (6 mL) and EtOH (6 mL) by sonication, the

round-bottomed flask was stirred in an oil bath at 0 °C for 20 min. The reaction mixture was filtered through a silica gel plug to remove any insoluble material. After the solvent had been evaporated under vacuum, the residue was separated on a silica gel column with CS<sub>2</sub>/DCM to give the product **7g** (*cis*-isomer: 10.4 mg, 27%; *trans*-isomer: 25.4 mg, 66%).

*Synthetic Application for 8a:* A dry 15-mL tube equipped with a magnetic stirrer was charged with **5a** (34.7 mg, 0.04 mmol), BH<sub>3</sub>·NH<sub>3</sub> (4.9 mg, 0.16 mmol). After dissolving the solids in anhydrous CB (6 mL) and EtOH (6 mL) by sonication, the round-bottomed flask was stirred in an oil bath at 0 °C for 20 min. The reaction mixture was filtered through a silica gel plug to remove any insoluble material. After the solvent had been evaporated under vacuum, the residue was separated on a silica gel column with CS<sub>2</sub>/DCM to give the quantitative product **8a**.

*Synthetic Application for 9a:* A dry 15-mL tube equipped with a magnetic stirrer was charged with **5a** (35.0 mg, 0.04 mmol), Dess-Martin periodinane (86.8 mg, 0.20 mmol). After dissolving the solids in anhydrous PhCl (6 mL) by sonication, the round-bottomed flask was stirred in an oil bath at 80 °C for 4 h. The reaction mixture was filtered through a silica gel plug to remove any insoluble material. After the solvent had been evaporated under vacuum, the residue was separated on a silica gel column with CS<sub>2</sub> as the eluent to give unreacted **5a** (3.3 mg, 9%), and then the eluent was switched to CS<sub>2</sub>/DCM/EA to give the product **9a** (30.0 mg, 85%).

*Procedures for Electrochemical Characterization Recording:* In a dry 15-mL electrolytic cup, 2.0×10<sup>-3</sup> mmol of product **2** (**5**), 2 mL of the solution of (*n*-Bu)<sub>4</sub>NClO<sub>4</sub> in ODCB (0.1 M), and 18 μL of the solution of ferrocene in ODCB (0.054 M) was added, respectively. After sonication, three different electrodes

S-6

(reference electrode: SCE; working electrode: Pt; auxiliary electrode: Pt wire) were placed in the sample solution, then running electrochemical workstation recorded the cyclic voltammogram (CV) of product **2 (5)** under an argon atmosphere.

*Procedures for UV-vis Spectra Recording:* A dry 100-mL volumetric flask was charged with the product **2 (5)** ( $1.4 \times 10^{-3} \sim 1.6 \times 10^{-3}$  mmol). After dissolving the solid with 100 mL of  $\text{CHCl}_3$  by sonication, a small amount of sample solution is added to a cuvette and then placed in the UV-vis spectrophotometer to record the UV-vis spectrum of product **2 (5)**.

### 3. DEPT-135 Spectra of Compound 2a

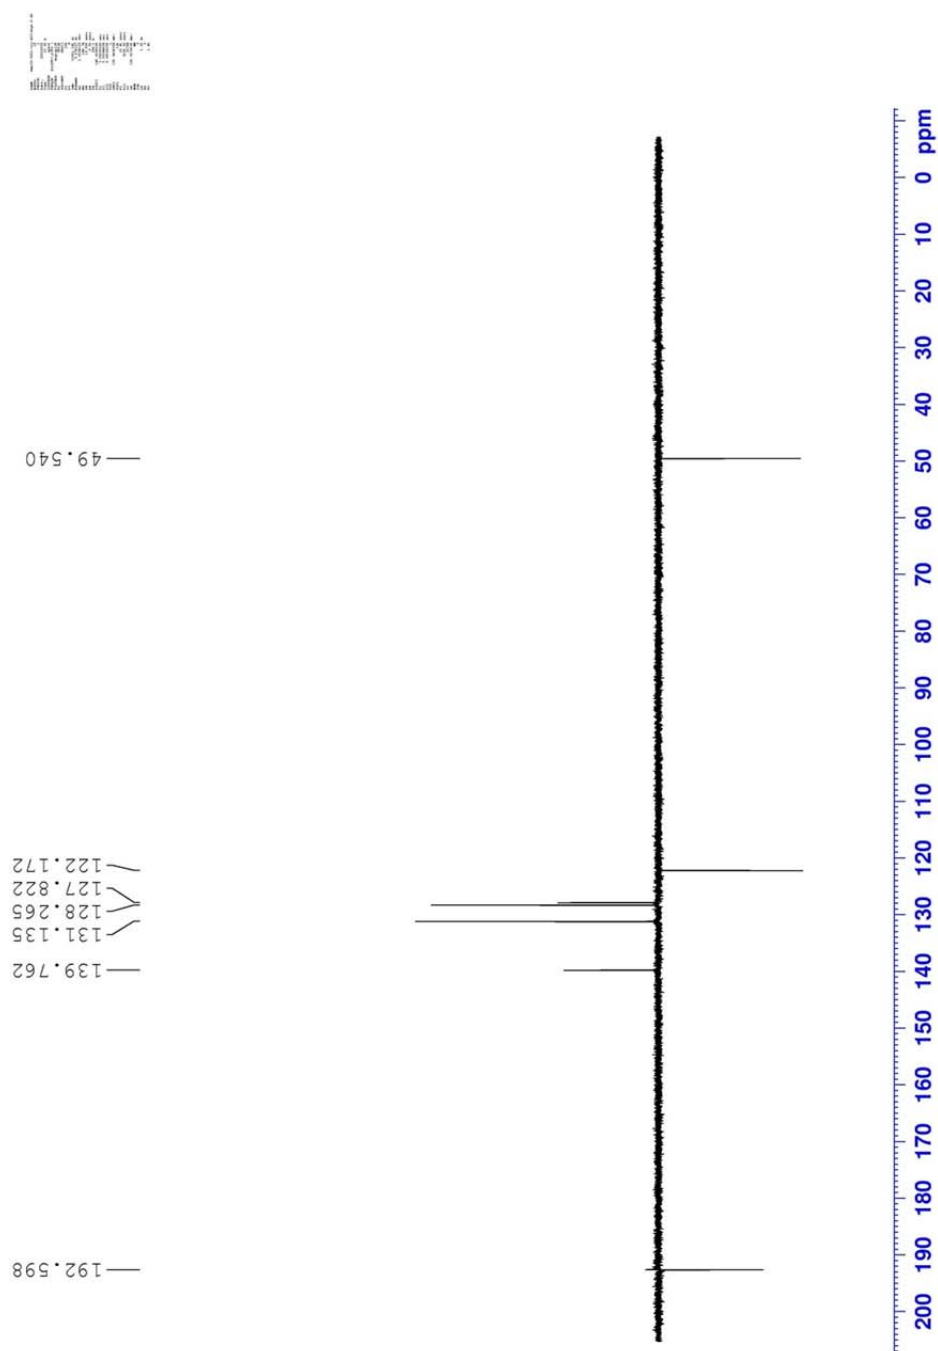

#### 4. 2D-NOESY Spectra of Compounds **5a**, **5d**, **5i**, *cis*- and *trans*-**7g**

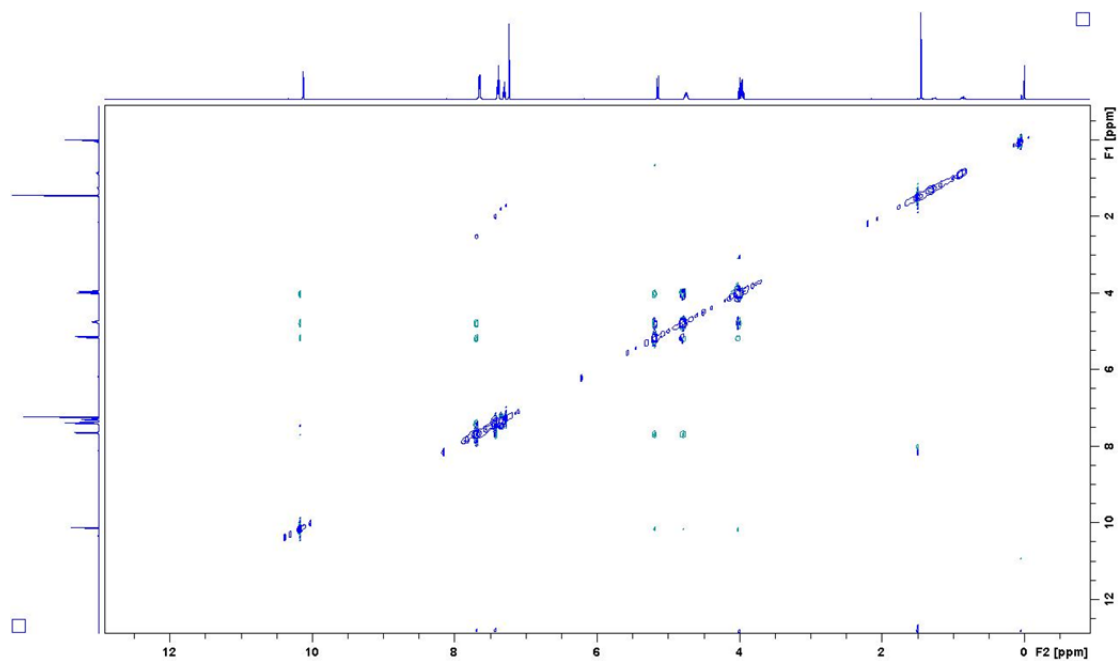

2D-NOESY Spectra of **5a** (CDCl<sub>3</sub>/CS<sub>2</sub>)

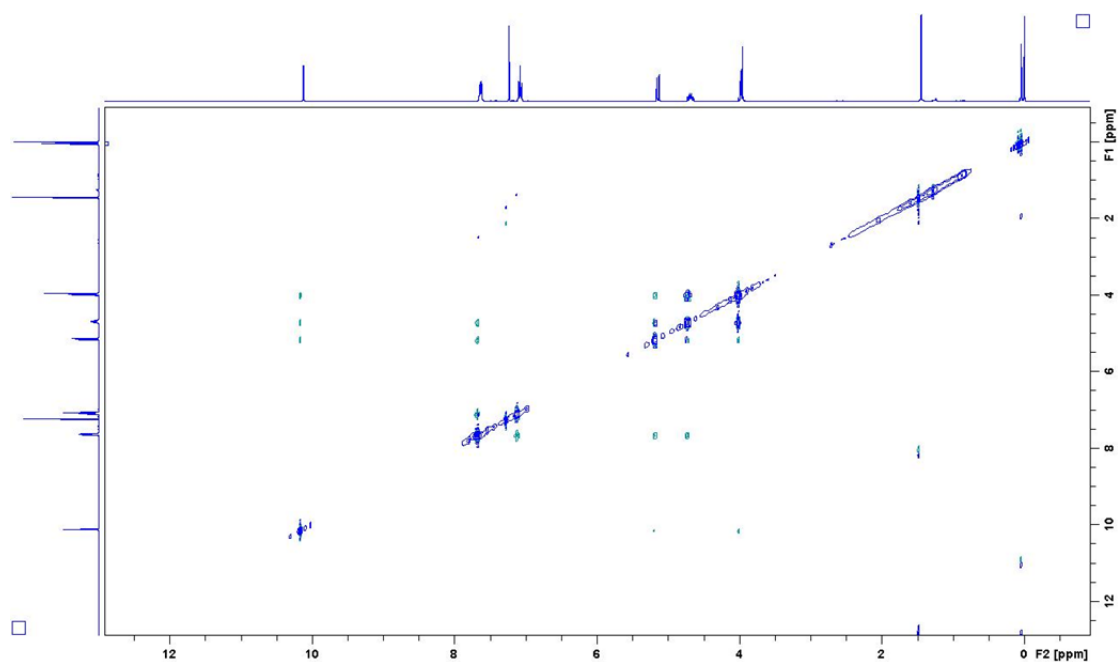

2D-NOESY Spectra of **5d** (CDCl<sub>3</sub>/CS<sub>2</sub>)

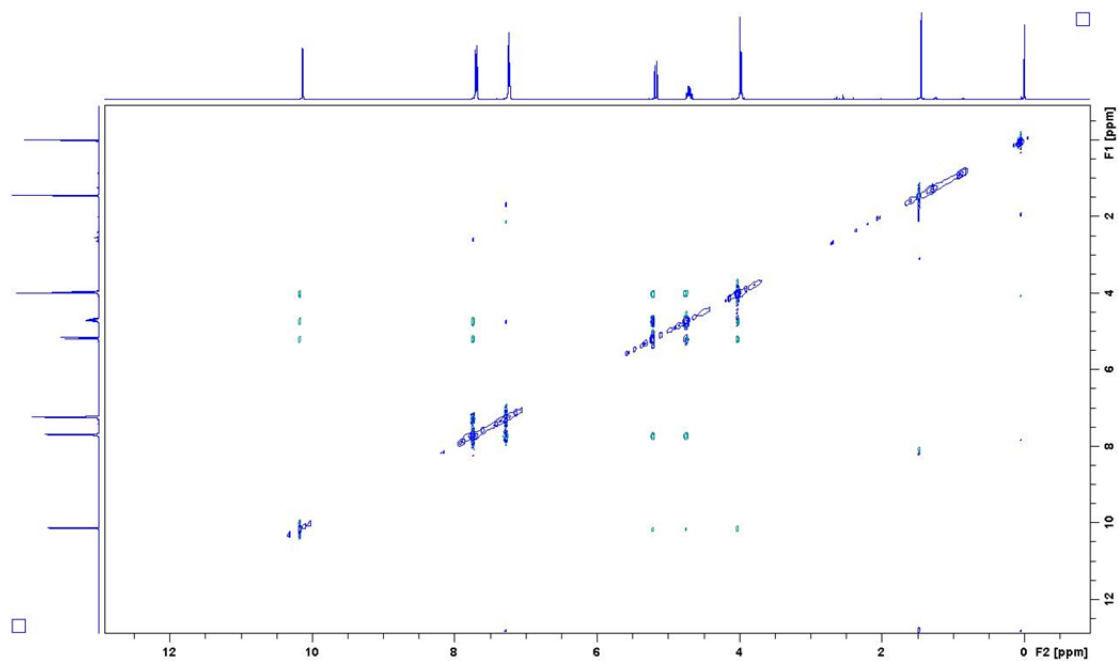

2D-NOESY Spectra of **5i** (CDCl<sub>3</sub>/CS<sub>2</sub>)

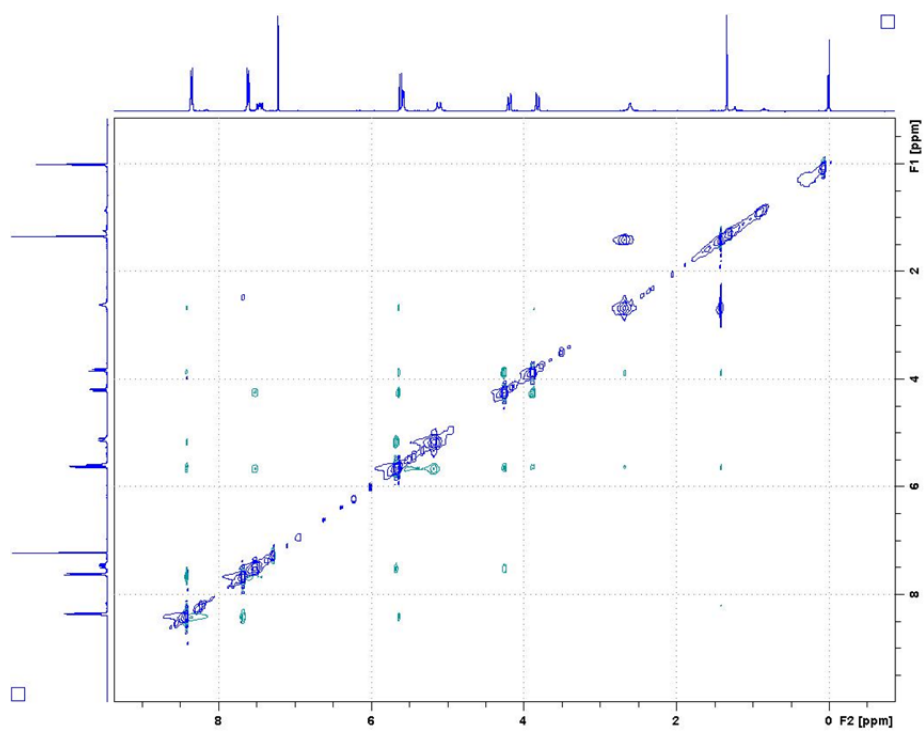

2D-NOESY Spectra of *cis*-**7g** (CDCl<sub>3</sub>/CS<sub>2</sub>)

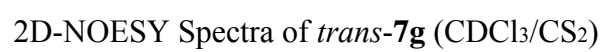

## 5. 1D-NOESY $^1\text{H}$ NMR of **5a**, **5d**, **5i**, **8a** and **9a**

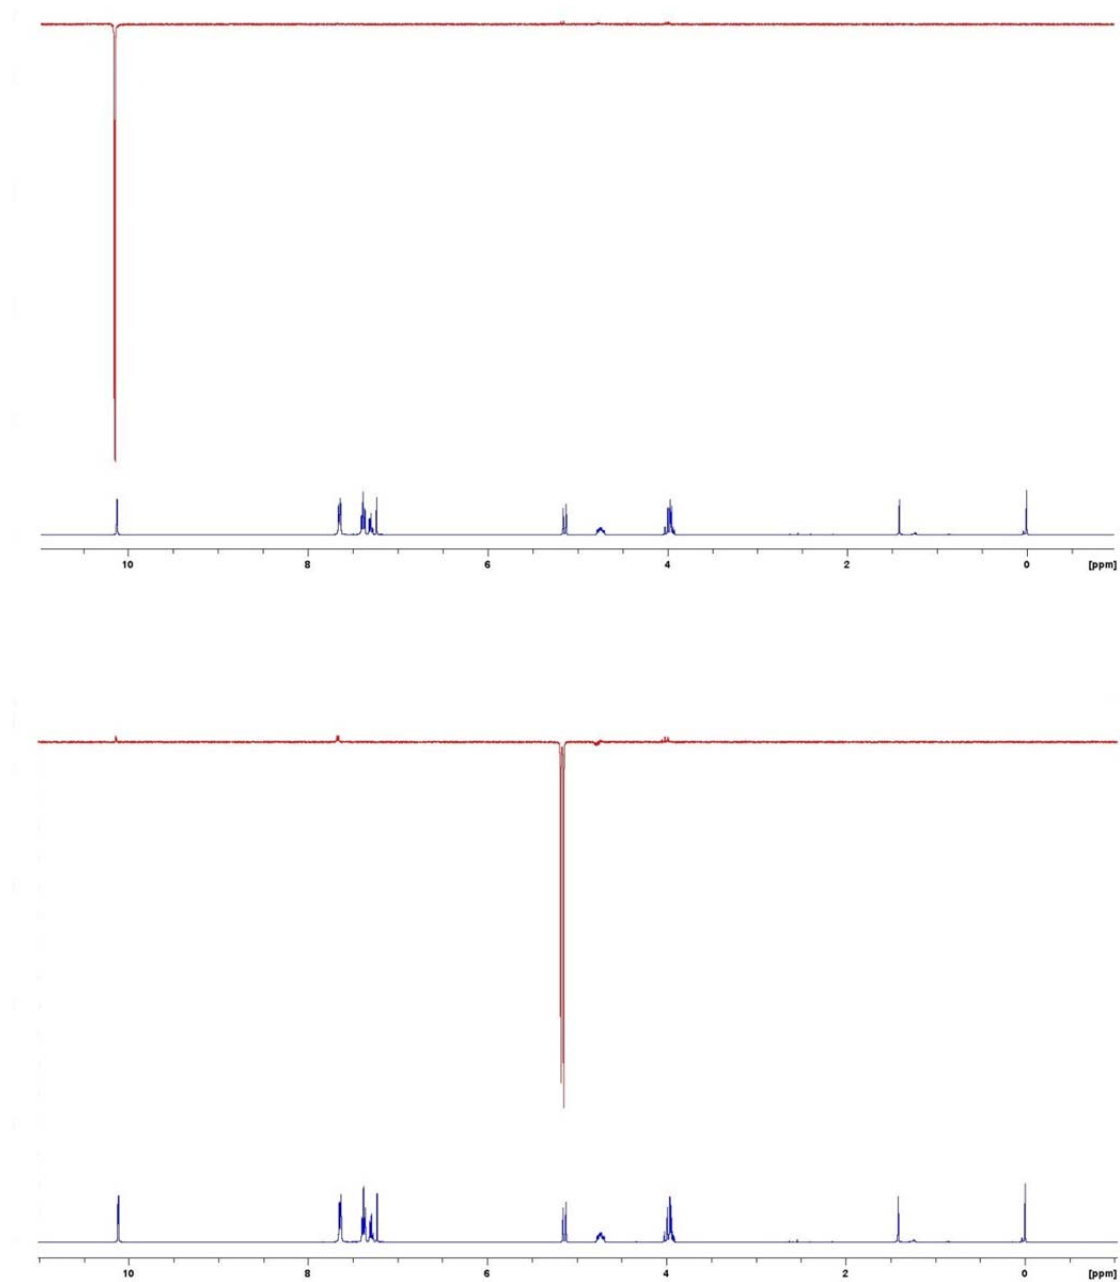

1D-NOESY  $^1\text{H}$  NMR of **5a** (600 MHz,  $\text{CDCl}_3/\text{CS}_2$ )

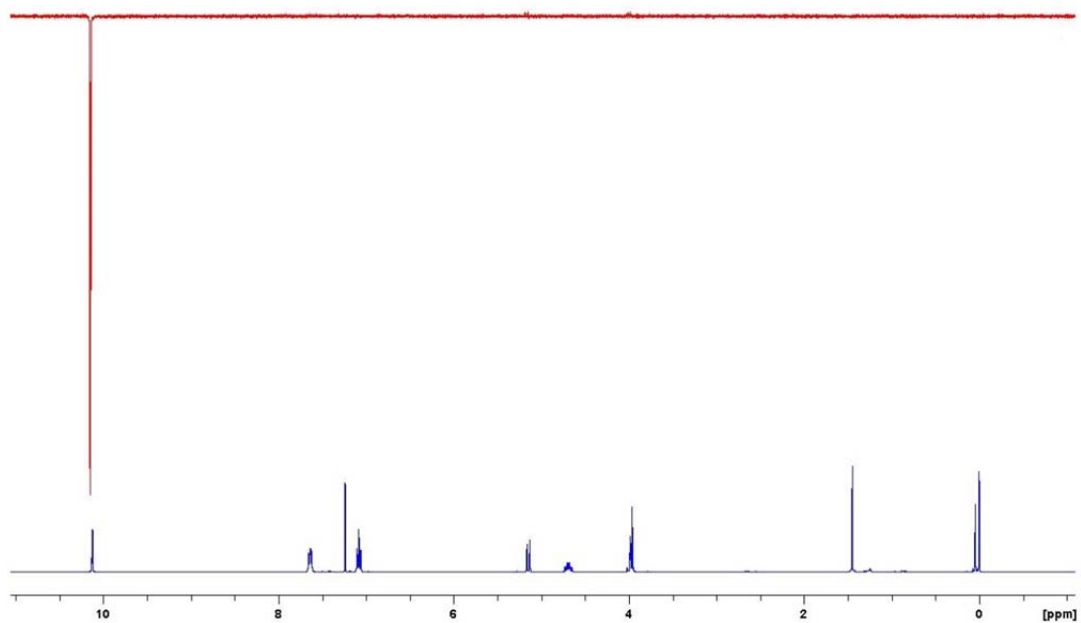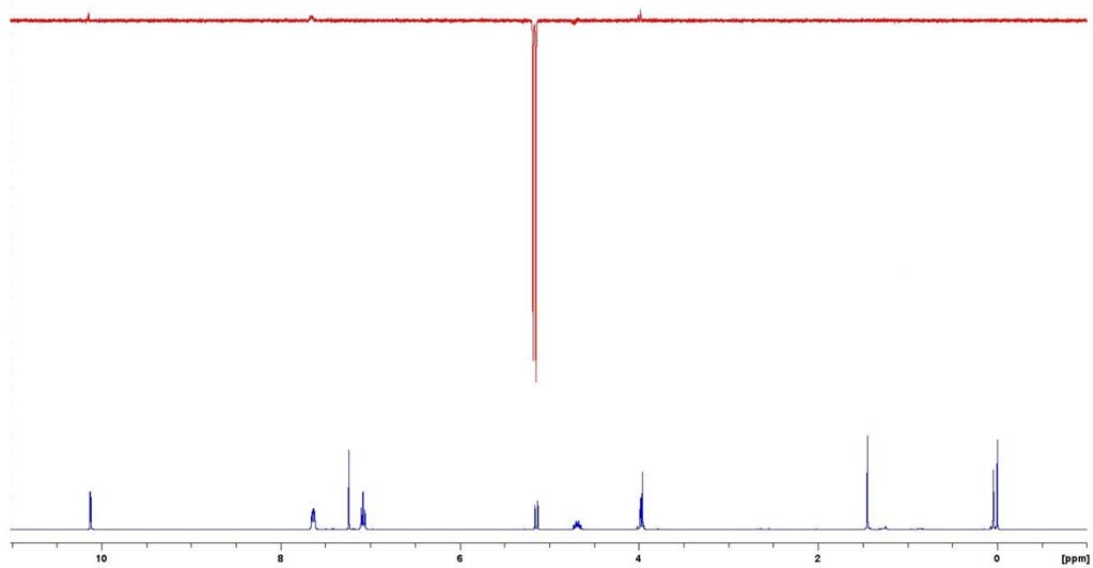

1D-NOESY  $^1\text{H}$  NMR of **5d** (600 MHz,  $\text{CDCl}_3/\text{CS}_2$ )

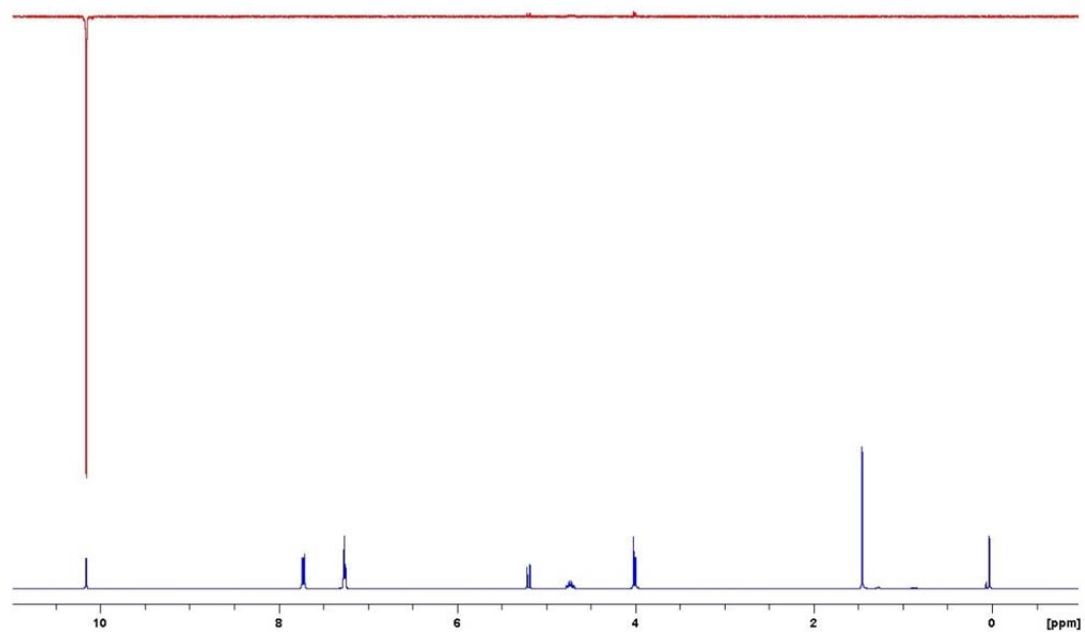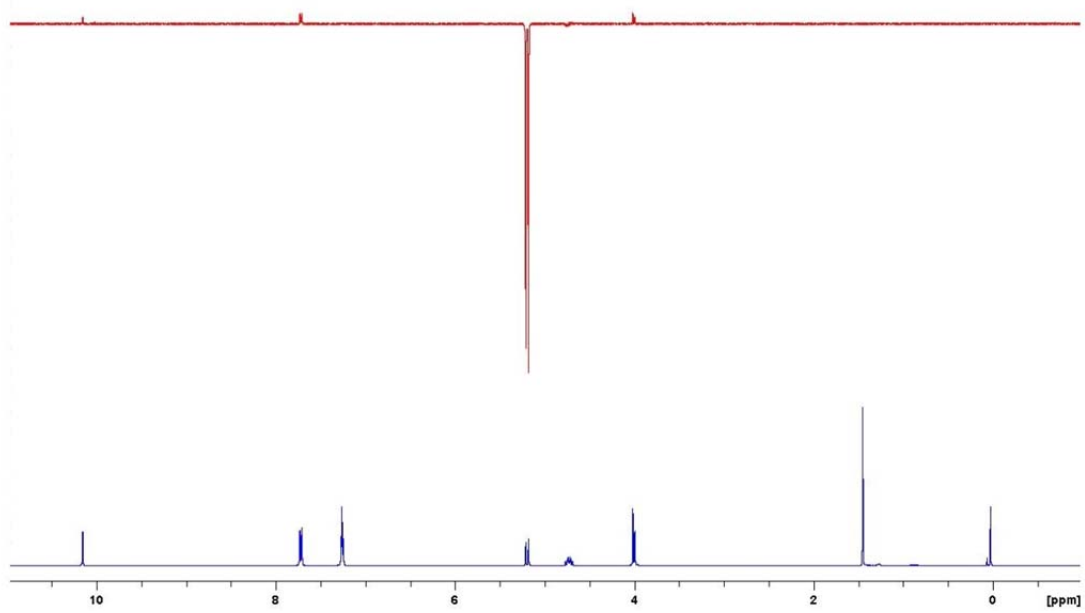

1D-NOESY  $^1\text{H}$  NMR of **5i** (600 MHz,  $\text{CDCl}_3/\text{CS}_2$ )

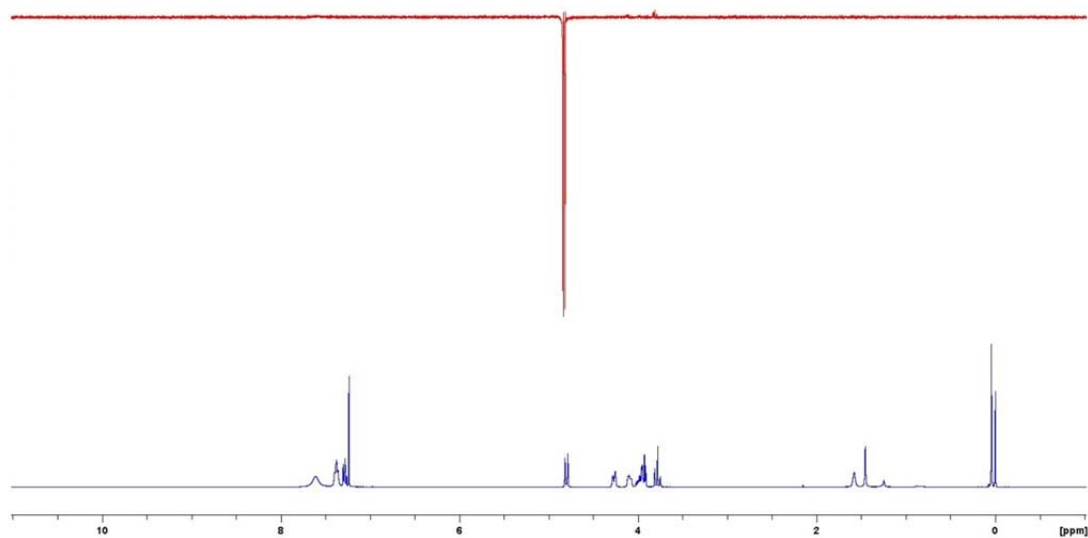

1D-NOESY  $^1\text{H}$  NMR of **8a** (600 MHz,  $\text{CDCl}_3/\text{CS}_2$ )

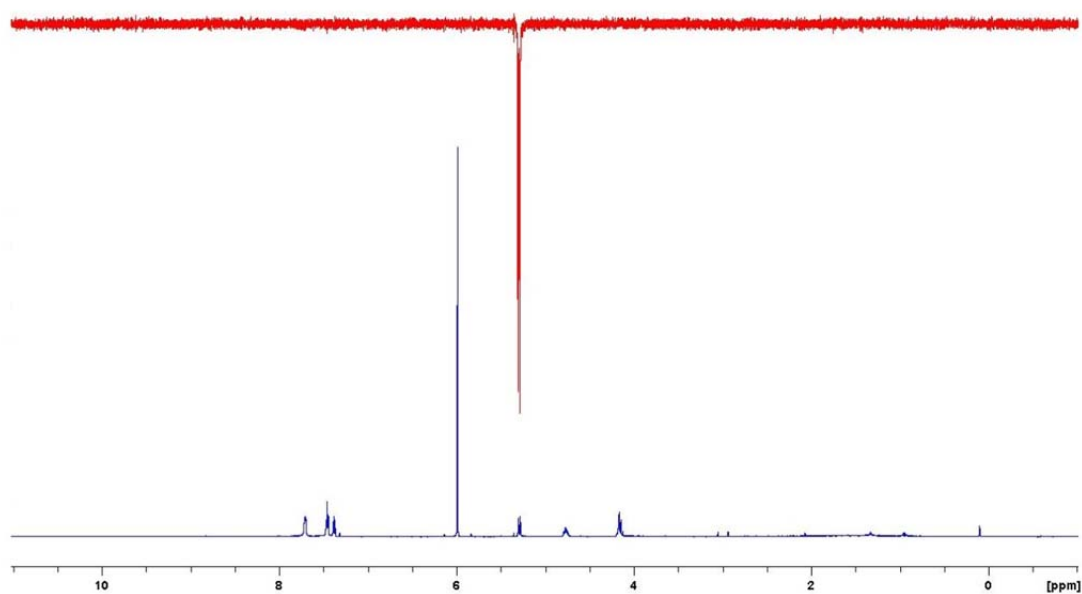

1D-NOESY  $^1\text{H}$  NMR of **9a** (600 MHz,  $\text{CD}_2\text{Cl}_4/\text{CS}_2$ )

## 6. UV-vis Spectra of Compounds **2** and **5**

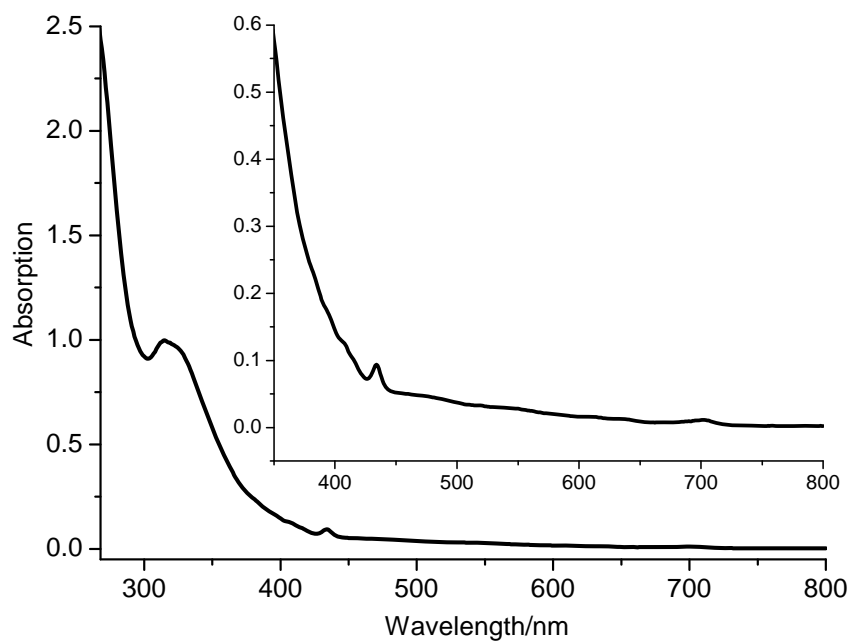

UV-vis spectrum of compound **2a** in  $\text{CHCl}_3$

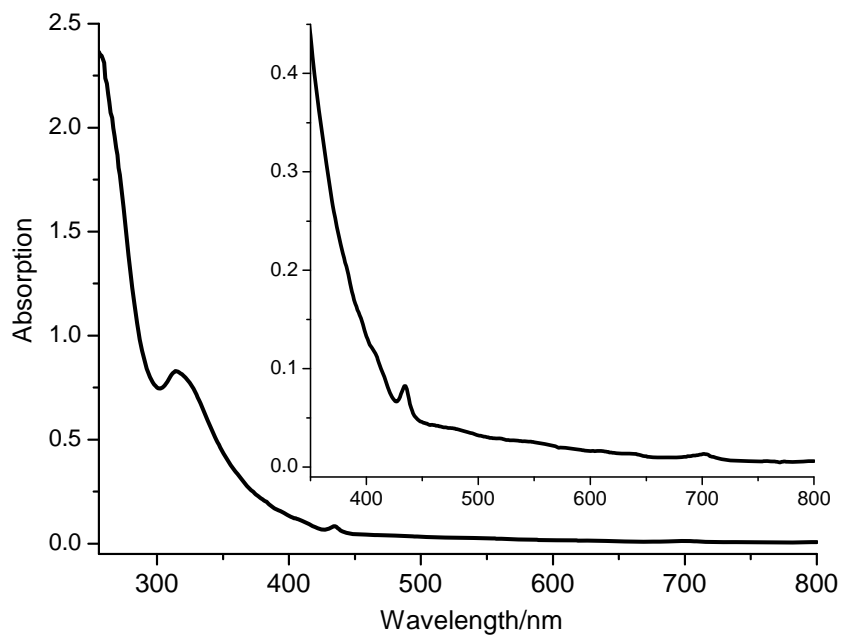

UV-vis spectrum of compound **2b** in  $\text{CHCl}_3$

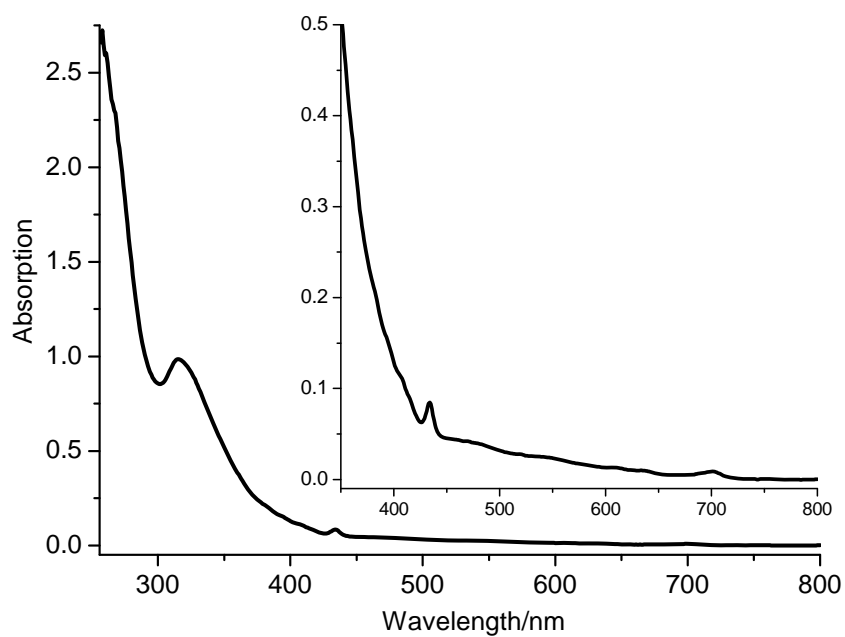

UV-vis spectrum of compound **2c** in  $\text{CHCl}_3$

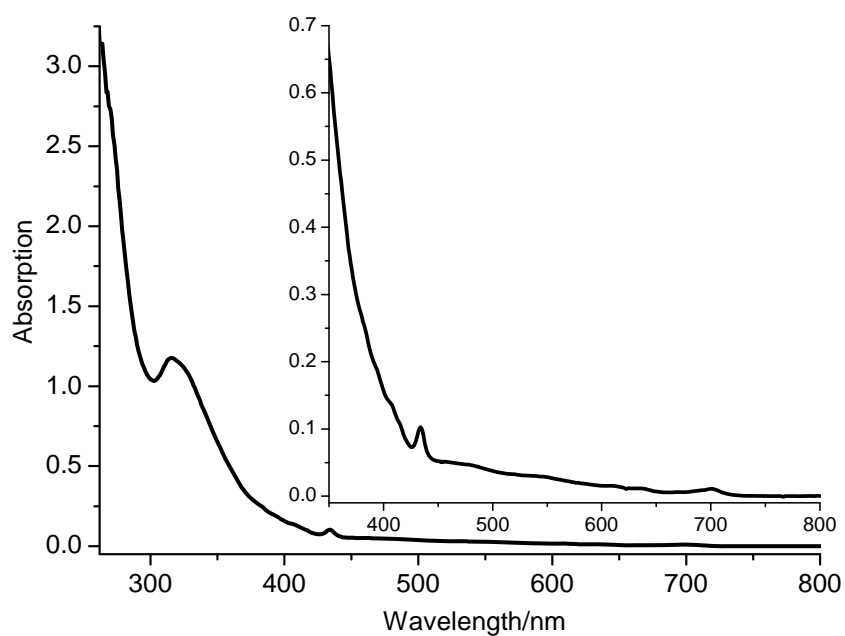

UV-vis spectrum of compound **2d** in  $\text{CHCl}_3$

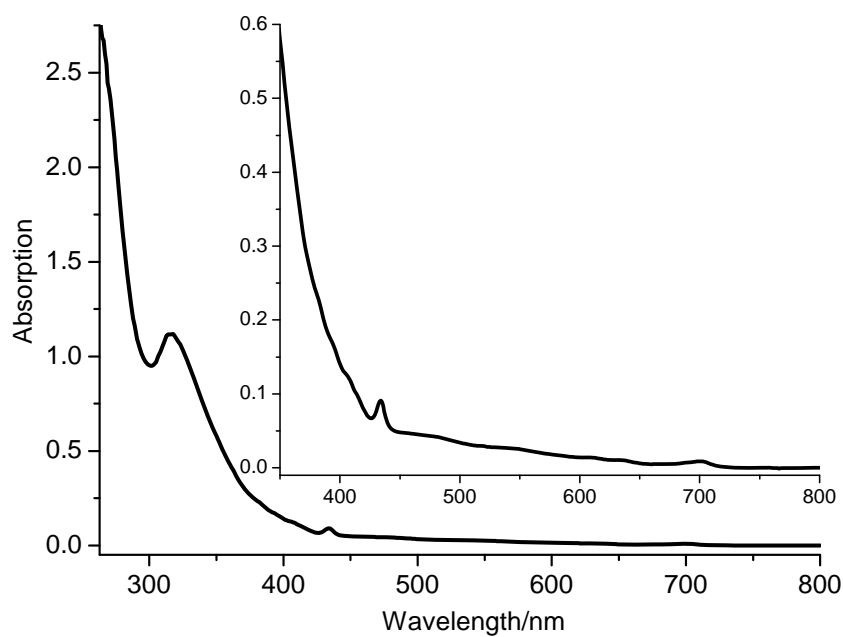

UV-vis spectrum of compound **2e** in  $\text{CHCl}_3$

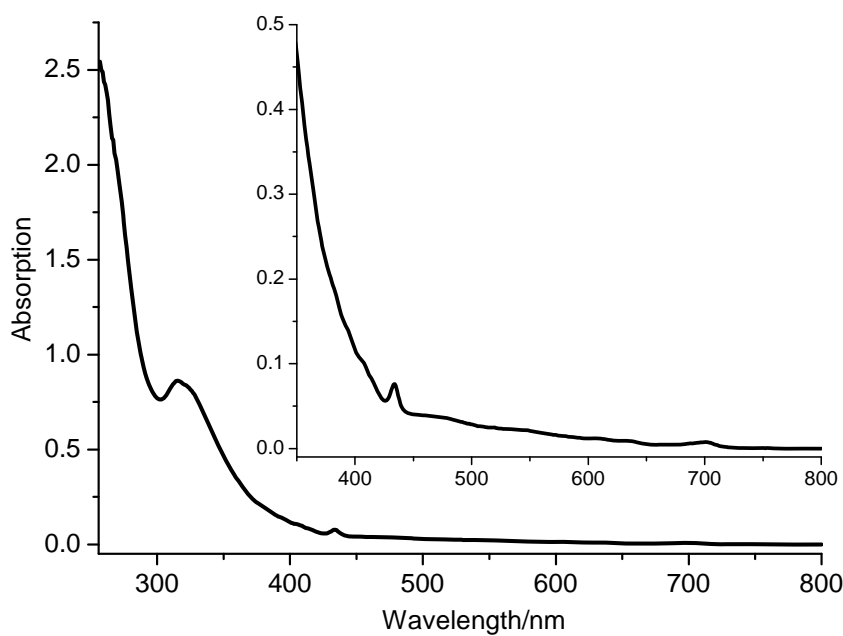

UV-vis spectrum of compound **2f** in  $\text{CHCl}_3$

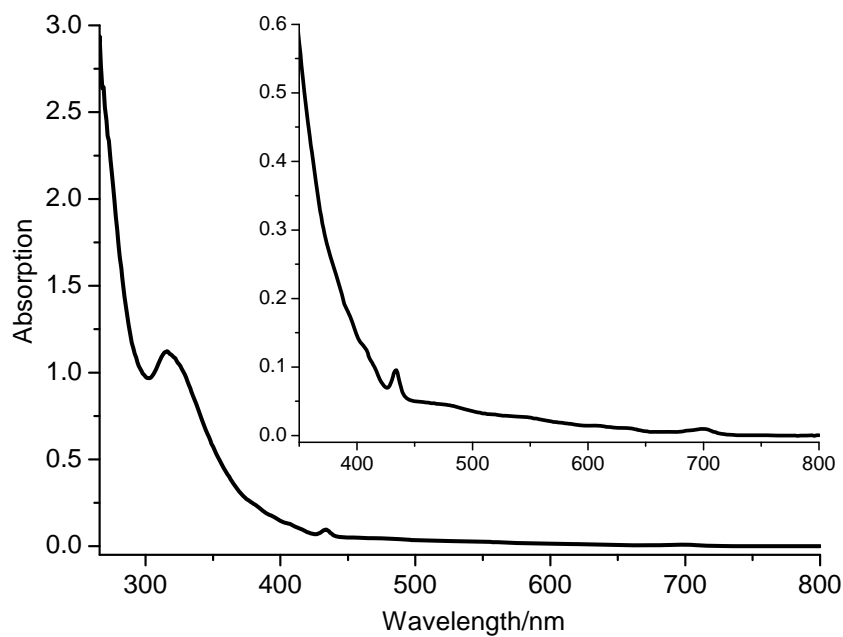

UV-vis spectrum of compound **2g** in  $\text{CHCl}_3$

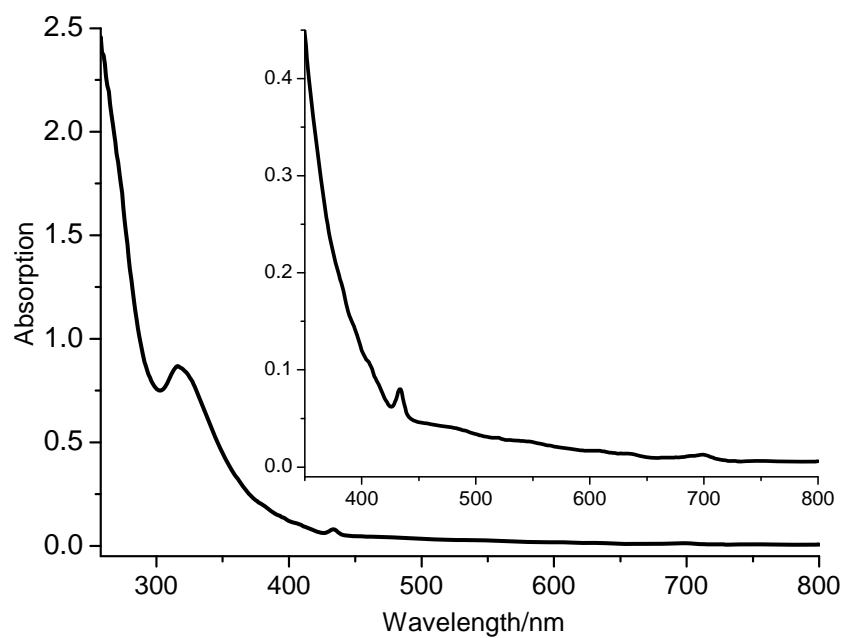

UV-vis spectrum of compound **2h** in  $\text{CHCl}_3$

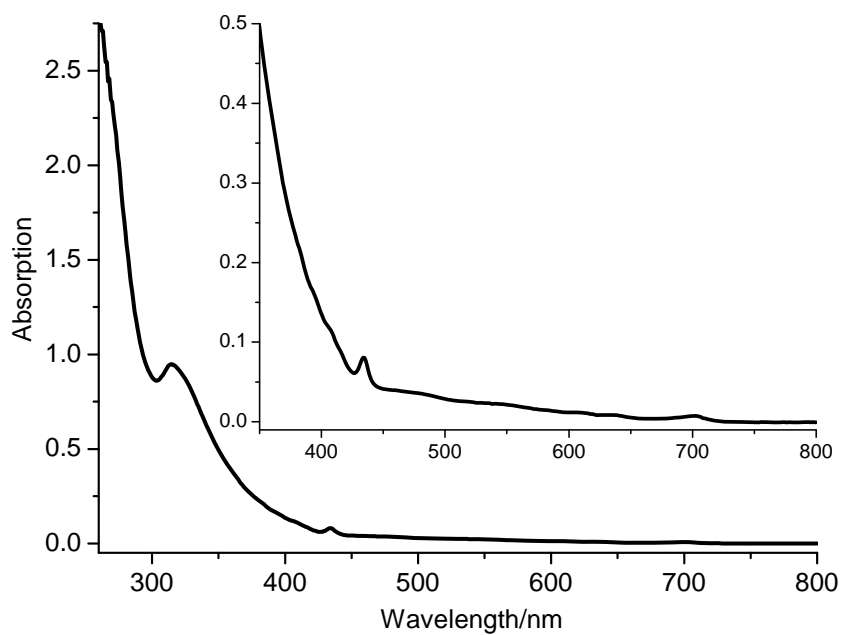

UV-vis spectrum of compound **2i** in CHCl<sub>3</sub>

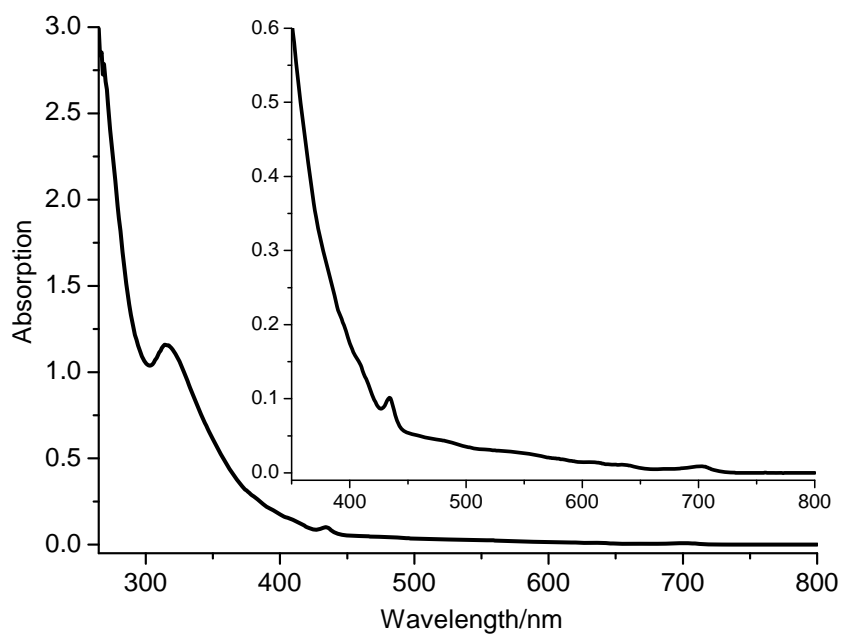

UV-vis spectrum of compound **2j** in CHCl<sub>3</sub>

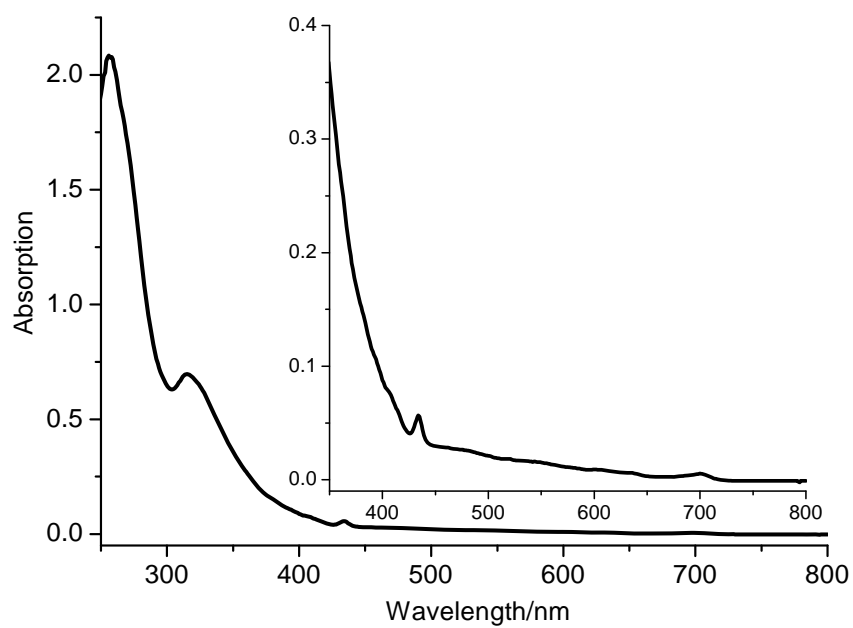

UV-vis spectrum of compound **2k** in  $\text{CHCl}_3$

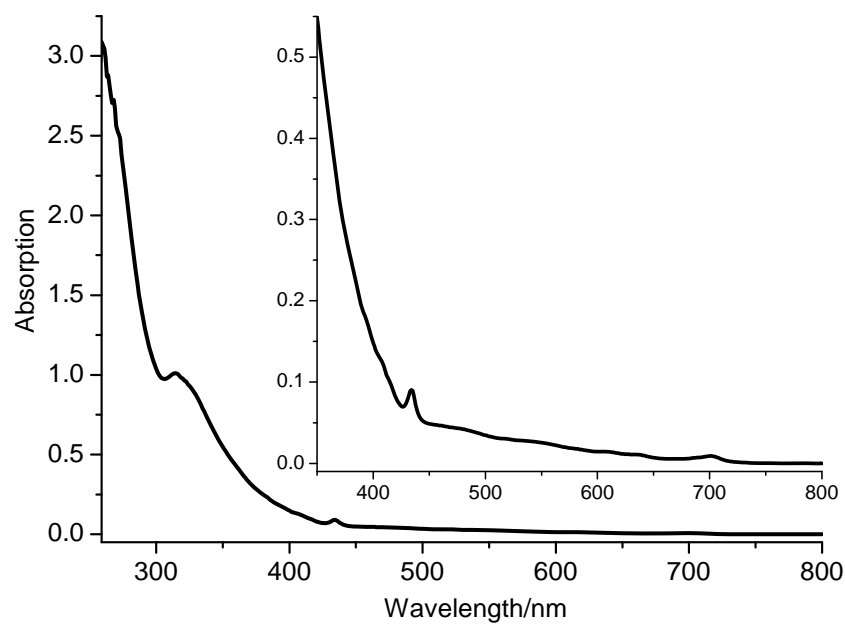

UV-vis spectrum of compound **2m** in  $\text{CHCl}_3$

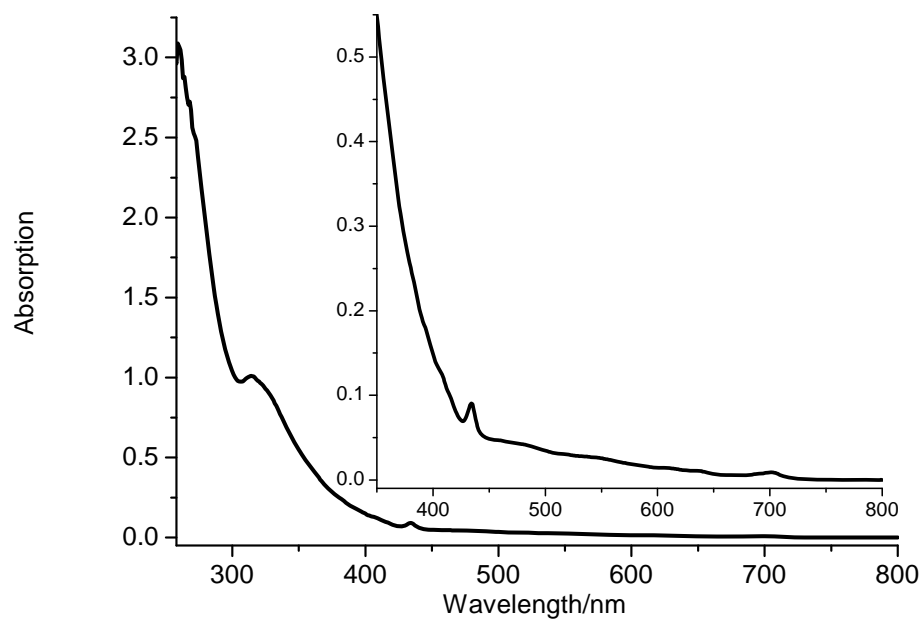

UV-vis spectrum of compound **2m'** in  $\text{CHCl}_3$

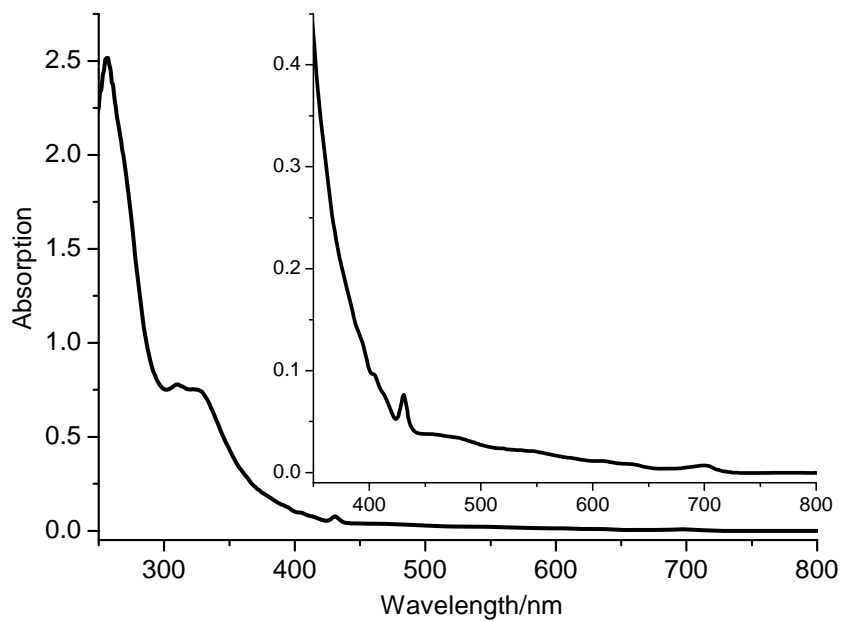

UV-vis spectrum of compound **5a** in  $\text{CHCl}_3$

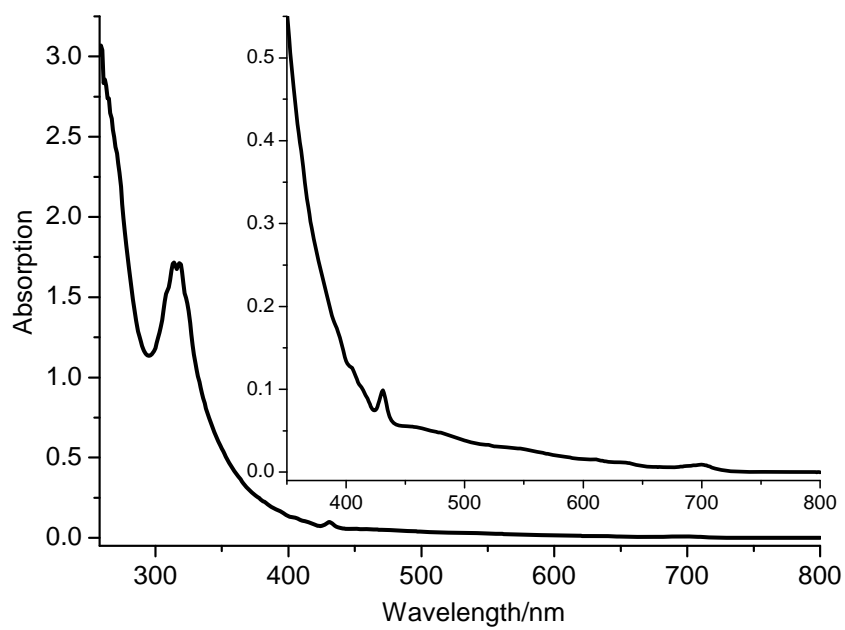

UV-vis spectrum of compound **5b** in  $\text{CHCl}_3$

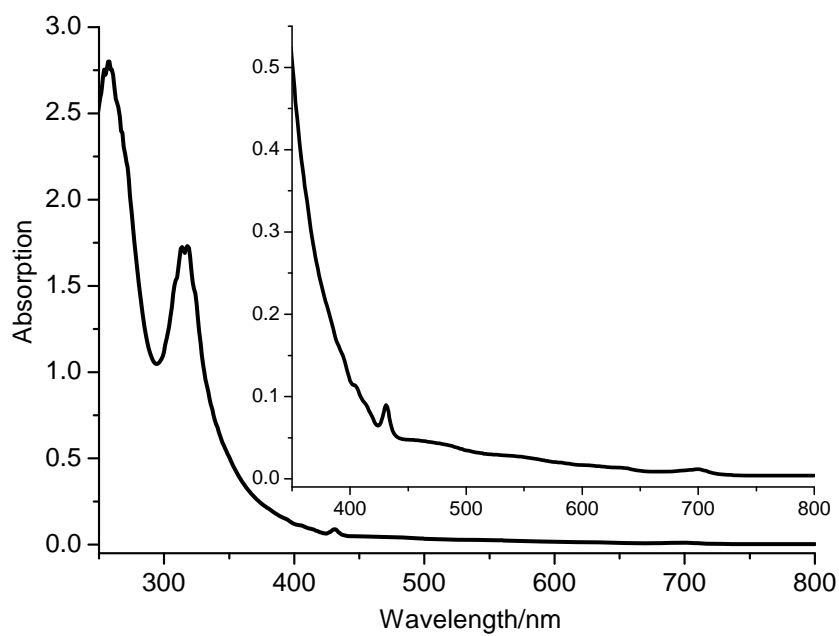

UV-vis spectrum of compound **5c** in  $\text{CHCl}_3$

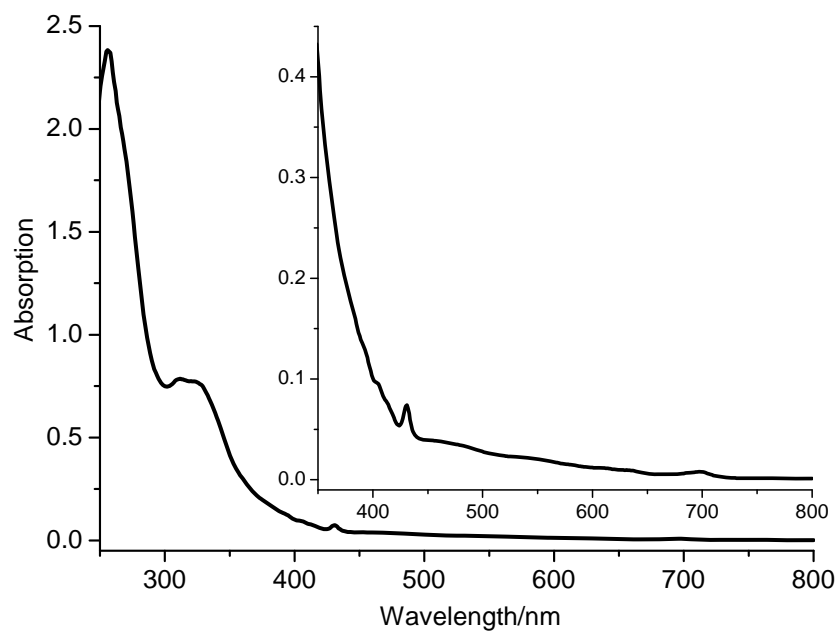

UV-vis spectrum of compound **5d** in  $\text{CHCl}_3$

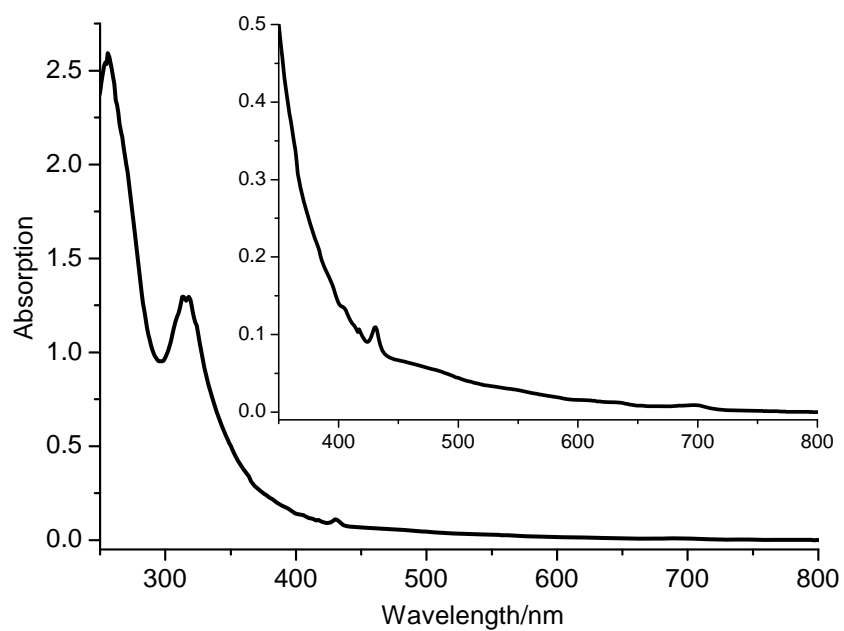

UV-vis spectrum of compound **5e** in  $\text{CHCl}_3$

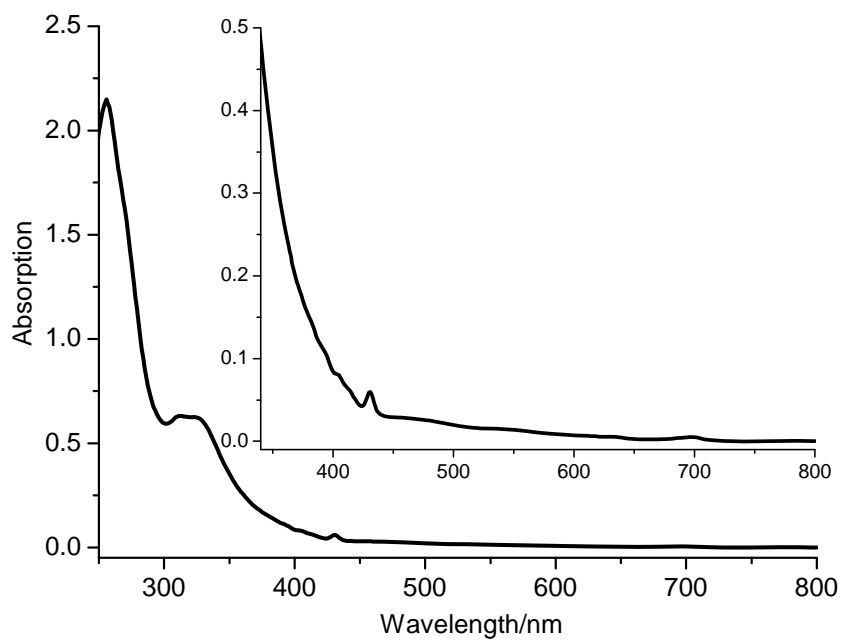

UV-vis spectrum of compound **5f** in  $\text{CHCl}_3$

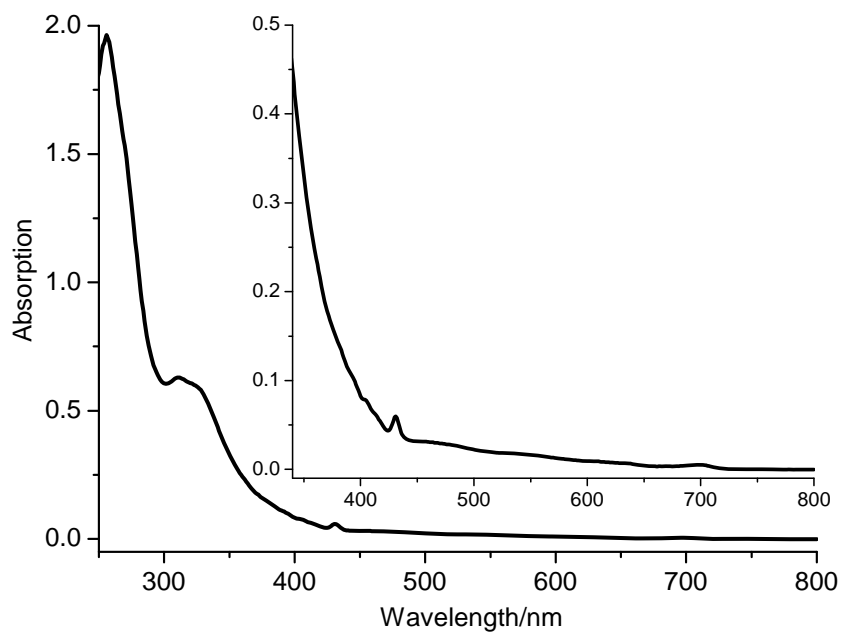

UV-vis spectrum of compound **5g** in  $\text{CHCl}_3$   
S-25

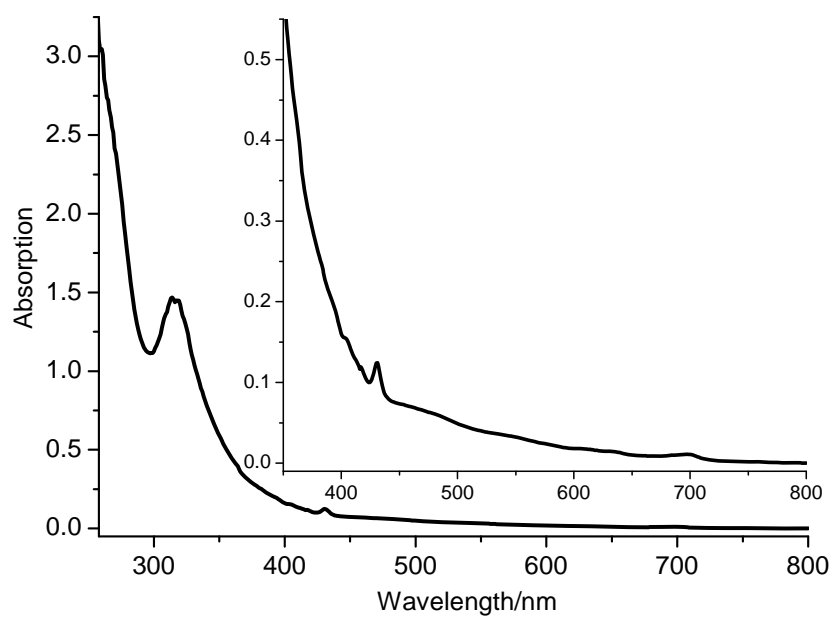

UV-vis spectrum of compound **5h** in  $\text{CHCl}_3$

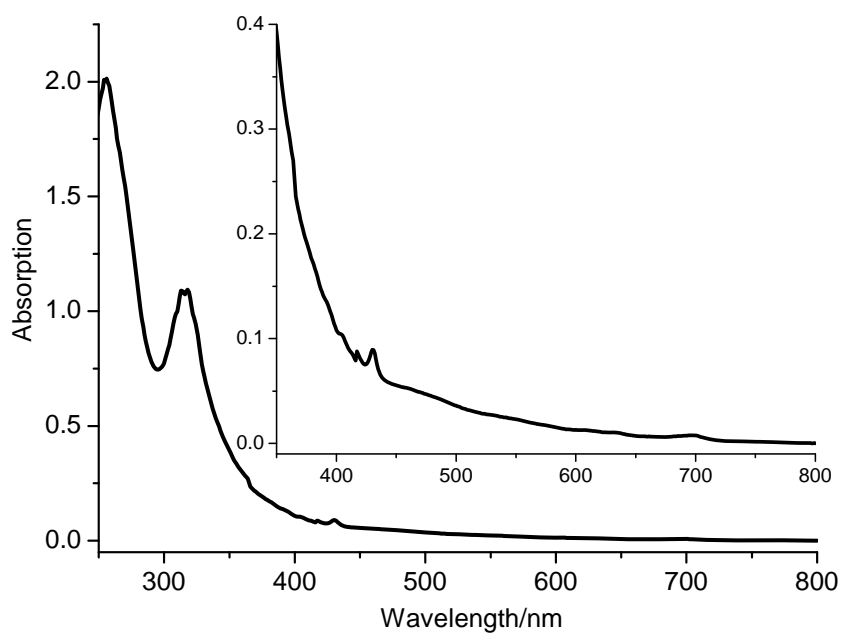

UV-vis spectrum of compound **5i** in  $\text{CHCl}_3$

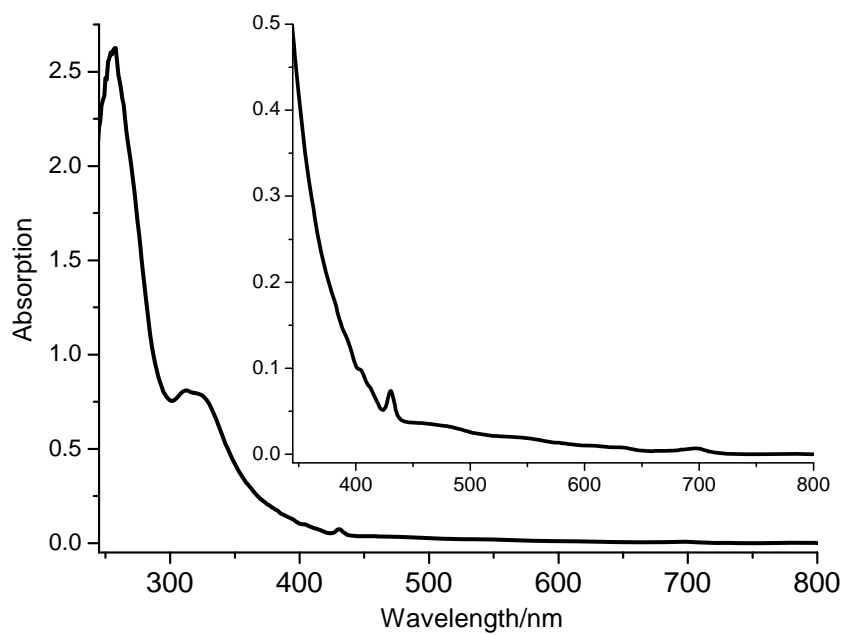

UV-vis spectrum of compound **5j** in  $\text{CHCl}_3$

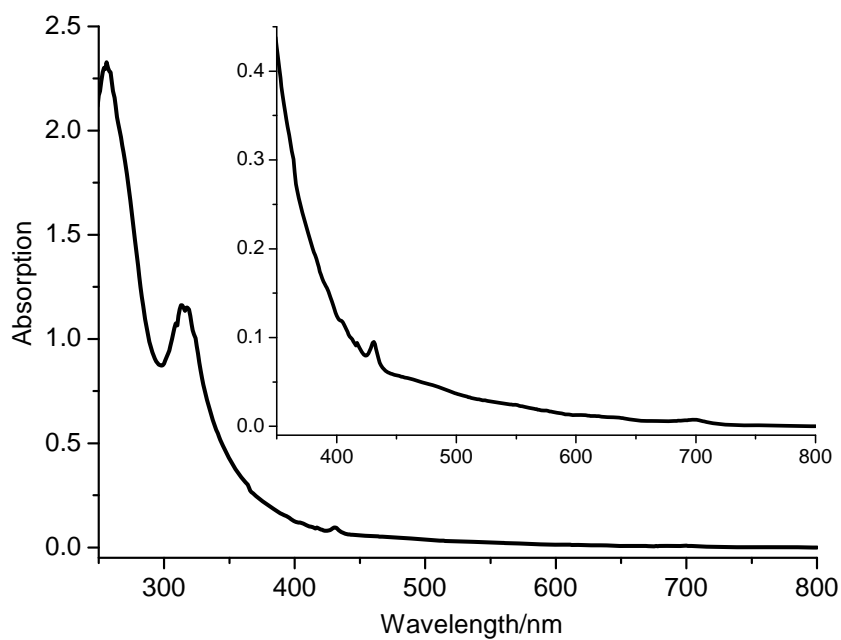

UV-vis spectrum of compound **5k** in  $\text{CHCl}_3$

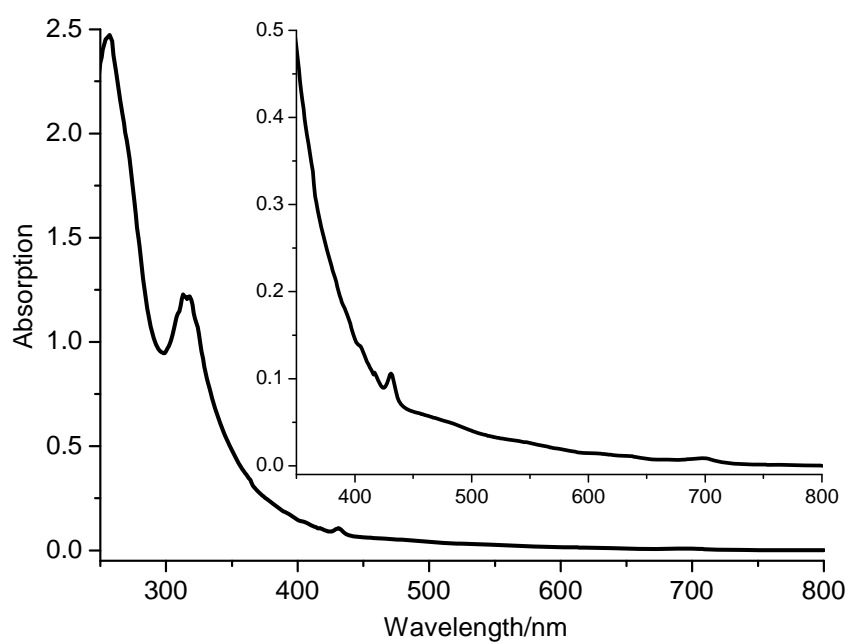

UV-vis spectrum of compound **5I** in  $\text{CHCl}_3$

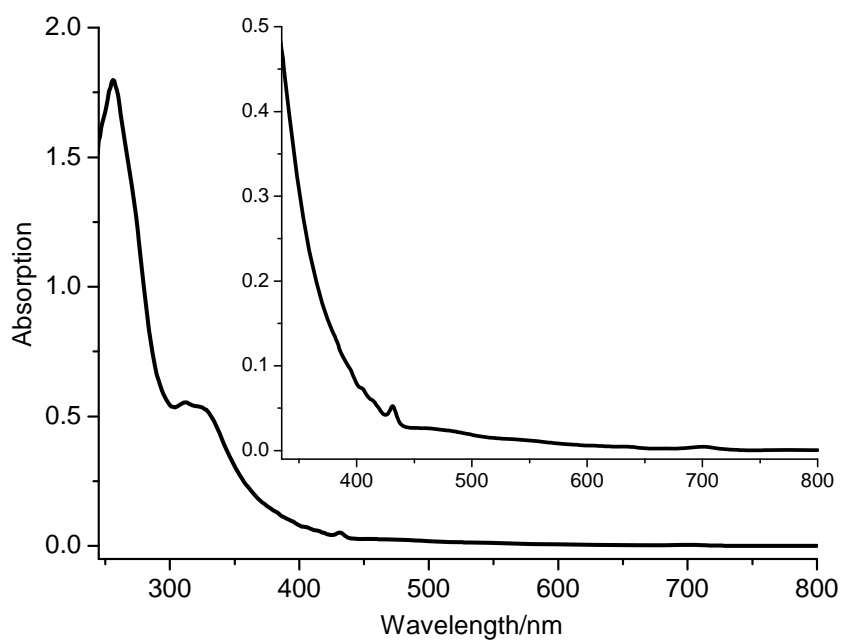

UV-vis spectrum of compound *cis*-**7g** in  $\text{CHCl}_3$

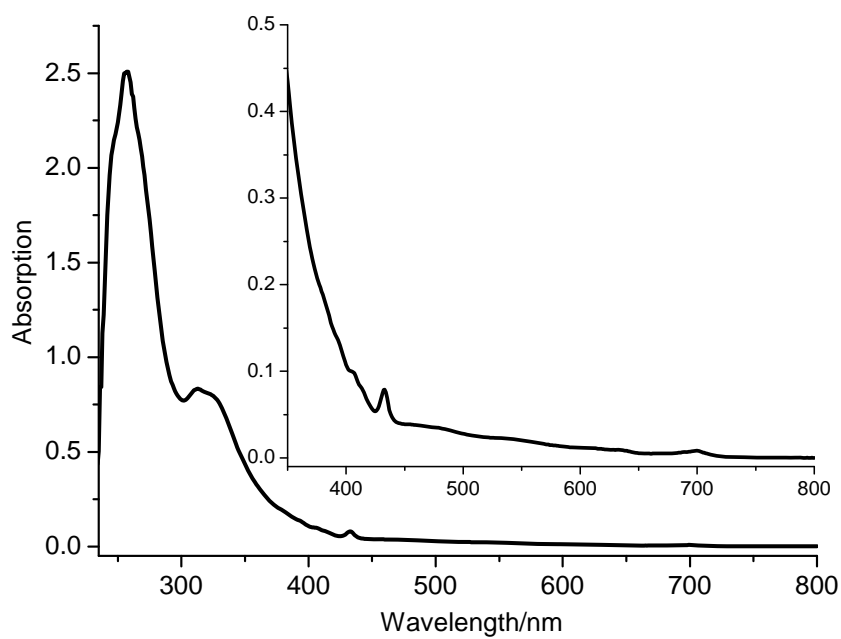

UV-vis spectrum of compound *trans*-**7g** in  $\text{CHCl}_3$

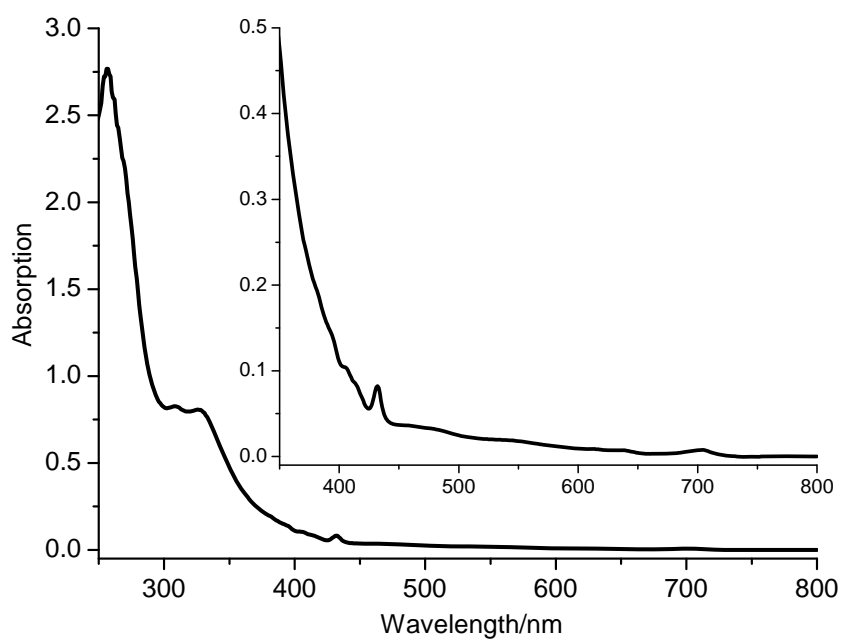

UV-vis spectrum of compound **8a** in  $\text{CHCl}_3$

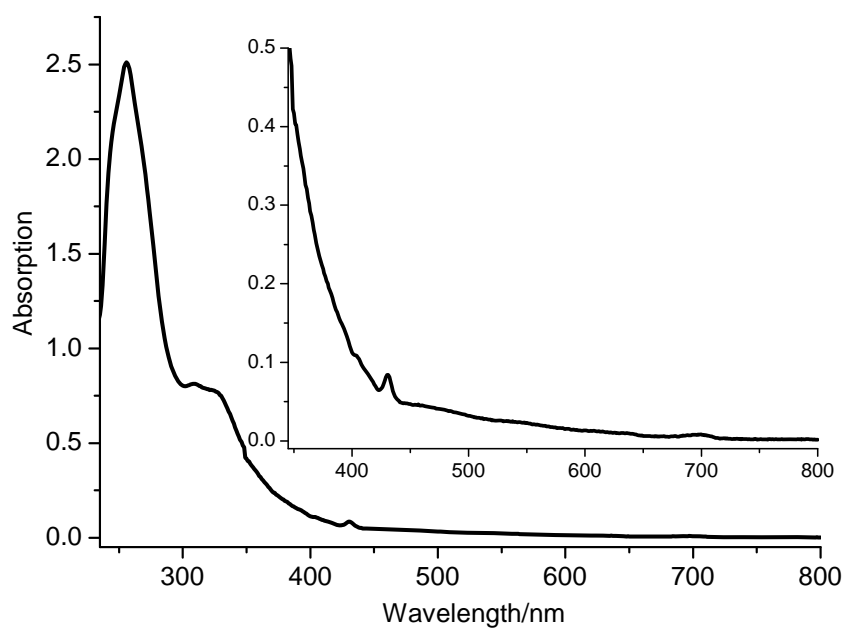

UV-vis spectrum of compound **9a** in  $\text{CHCl}_3$

## 7. CVs of Selected Compounds **2** and **5**

**Table S1. Half-Wave Reduction Potentials of compounds **2**, **5**, PCBM and C<sub>60</sub><sup>a</sup>**

| Compound              | $E_1$  | $E_2$  | $E_3$  | $LUMO$ |
|-----------------------|--------|--------|--------|--------|
| <b>2a</b>             | -1.145 | -1.543 | -2.087 | -3.655 |
| <b>2b</b>             | -1.151 | -1.547 | -2.093 | -3.650 |
| <b>2c</b>             | -1.149 | -1.555 | -2.103 | -3.651 |
| <b>2d</b>             | -1.152 | -1.574 | -2.136 | -3.648 |
| <b>2e</b>             | -1.132 | -1.524 | -2.062 | -3.668 |
| <b>2f</b>             | -1.154 | -1.569 | -2.121 | -3.647 |
| <b>2g</b>             | -1.130 | -1.518 | -2.051 | -3.670 |
| <b>2h</b>             | -1.134 | -1.557 | -2.118 | -3.666 |
| <b>2i</b>             | -1.153 | -1.560 | -2.112 | -3.647 |
| <b>2j</b>             | -1.145 | -1.535 | -2.080 | -3.655 |
| <b>2k</b>             | -1.141 | -1.551 | -2.091 | -3.660 |
| <b>5a</b>             | -1.171 | -1.565 | -2.110 | -3.629 |
| <b>5b</b>             | -1.184 | -1.593 | -2.145 | -3.616 |
| <b>5c</b>             | -1.180 | -1.578 | -2.124 | -3.620 |
| <b>5d</b>             | -1.169 | -1.574 | -2.120 | -3.631 |
| <b>5e</b>             | -1.174 | -1.583 | -2.136 | -3.626 |
| <b>5f</b>             | -1.173 | -1.573 | -2.112 | -3.627 |
| <b>5g</b>             | -1.164 | -1.564 | -2.107 | -3.636 |
| <b>5h</b>             | -1.171 | -1.583 | -2.137 | -3.629 |
| <b>5i</b>             | -1.159 | -1.560 | -2.109 | -3.641 |
| <b>5j</b>             | -1.154 | -1.548 | -2.078 | -3.646 |
| <b>5k</b>             | -1.169 | -1.567 | -2.112 | -3.631 |
| <b>5l</b>             | -1.166 | -1.551 | -2.090 | -3.634 |
| <b>PCBM</b>           | -1.180 | -1.581 | -2.110 | -3.620 |
| <b>C<sub>60</sub></b> | -1.088 | -1.490 | -1.973 | -3.712 |

<sup>a</sup>Versus ferrocene/ferrocenium; experimental conditions: 1 mM of compounds **2** (**5**) and 0.1 M of (n-Bu)<sub>4</sub>NClO<sub>4</sub> in anhydrous *o*-dichlorobenzene; reference electrode: SCE; working electrode: Pt; auxiliary electrode: Pt wire; scanning rate: 50 mV s<sup>-1</sup>.

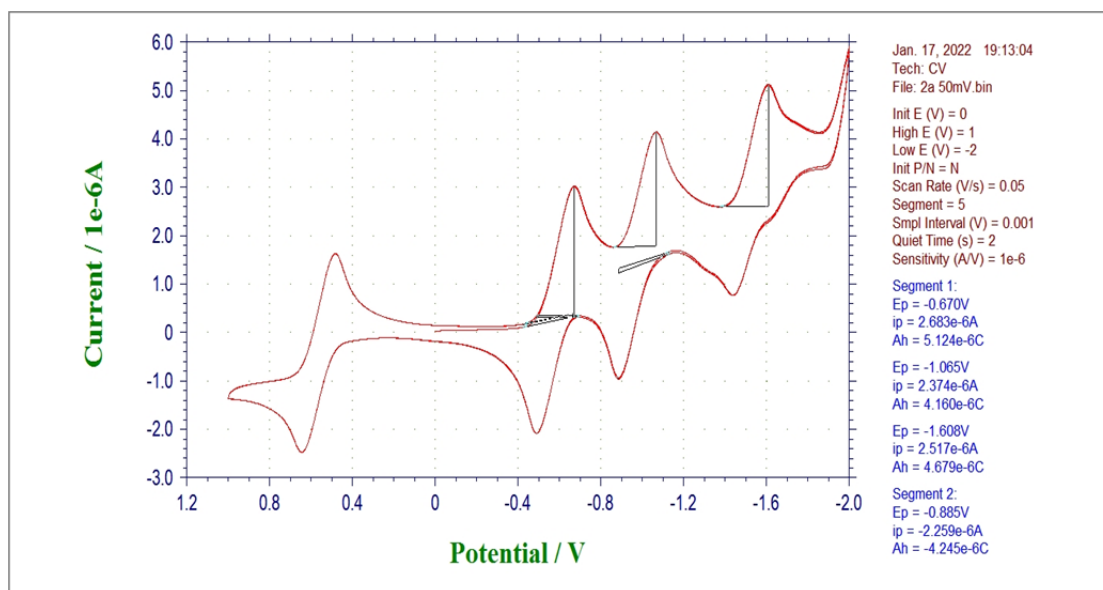

Cyclic voltammogram of compound **2a** (scanning rate: 50 mV s<sup>-1</sup>)

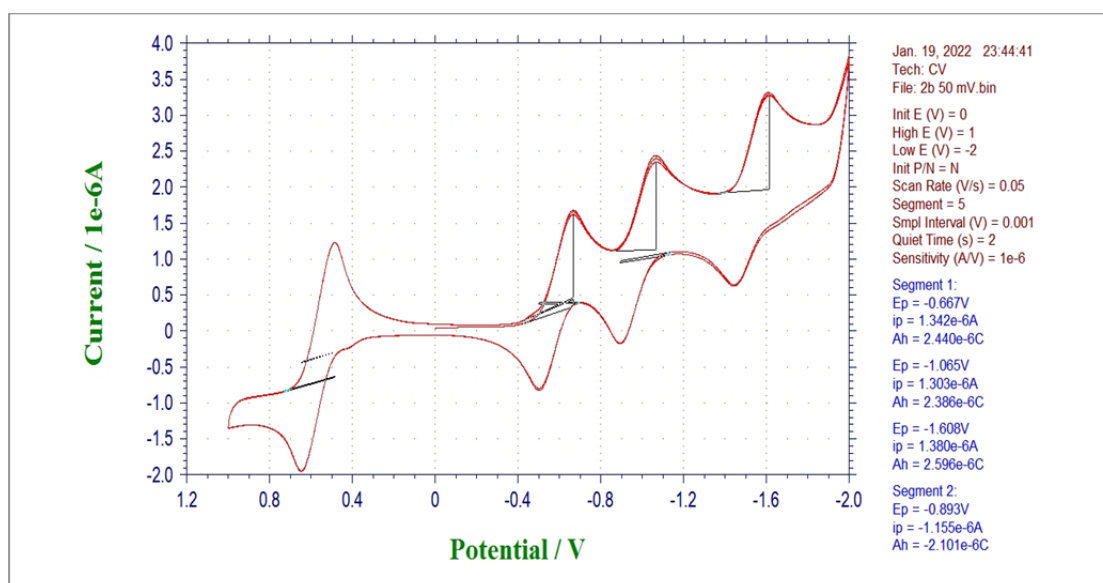

Cyclic voltammogram of compound **2b** (scanning rate: 50 mV s<sup>-1</sup>)

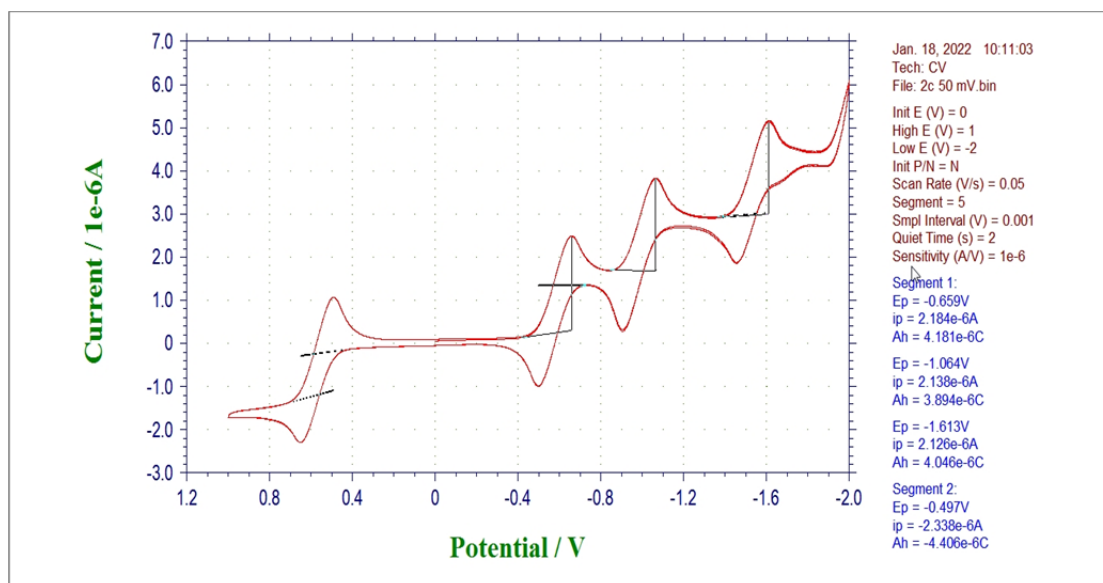

Cyclic voltammogram of compound **2c** (scanning rate: 50 mV s<sup>-1</sup>)

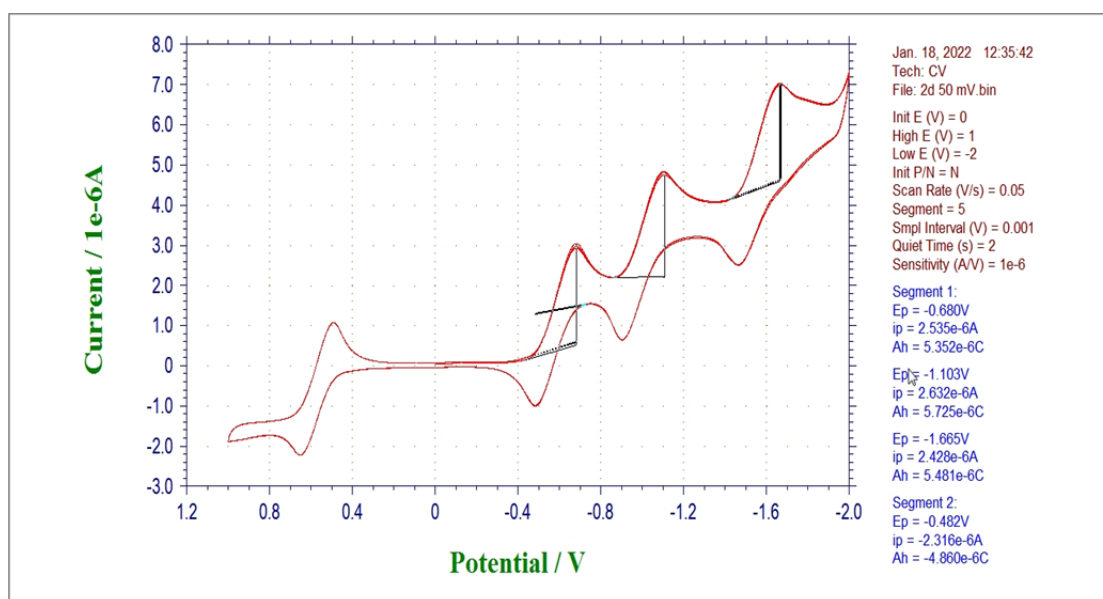

Cyclic voltammogram of compound **2d** (scanning rate: 50 mV s<sup>-1</sup>)

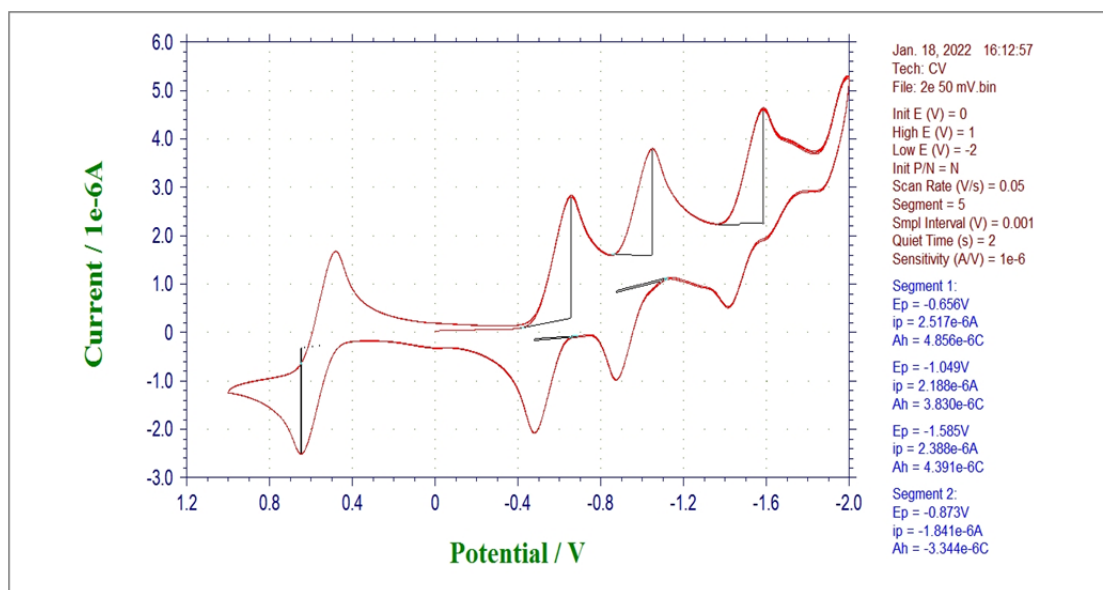

Cyclic voltammogram of compound **2e** (scanning rate: 50 mV s<sup>-1</sup>)

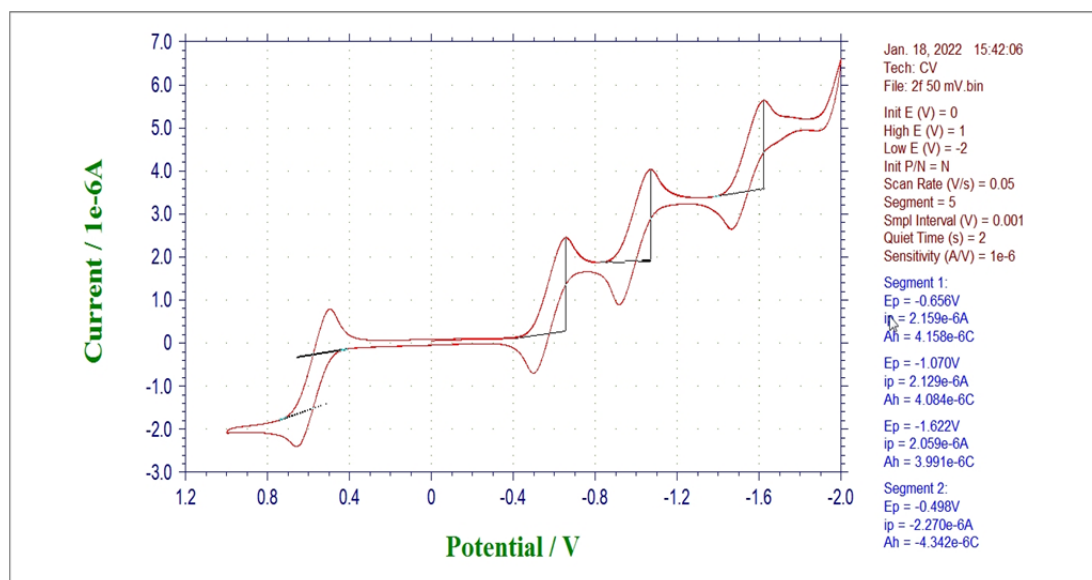

Cyclic voltammogram of compound **2f** (scanning rate: 50 mV s<sup>-1</sup>)

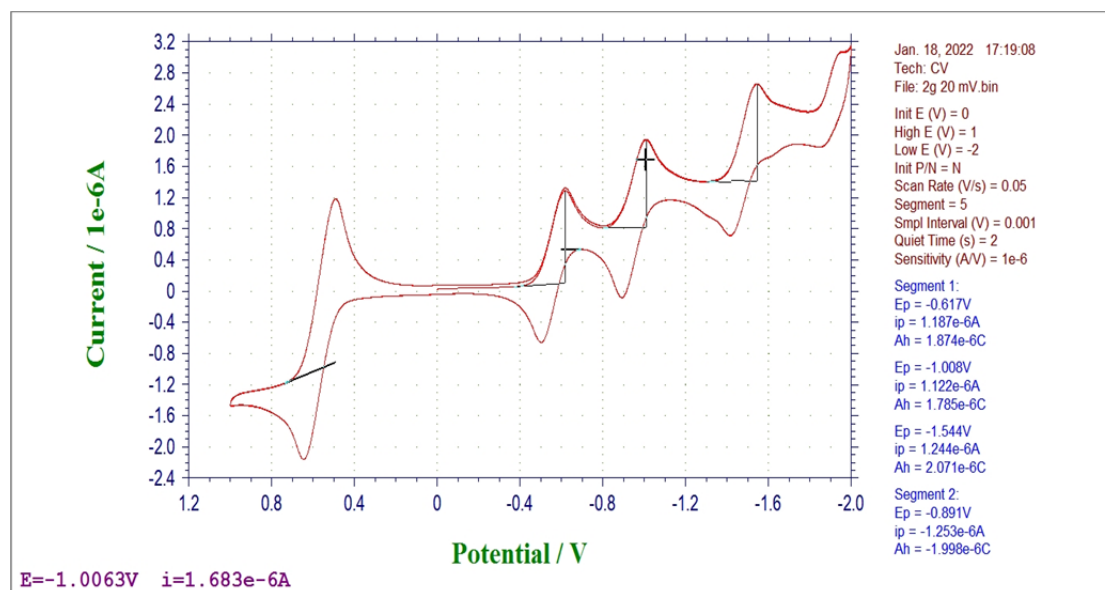

Cyclic voltammogram of compound **2g** (scanning rate: 50 mV s<sup>-1</sup>)

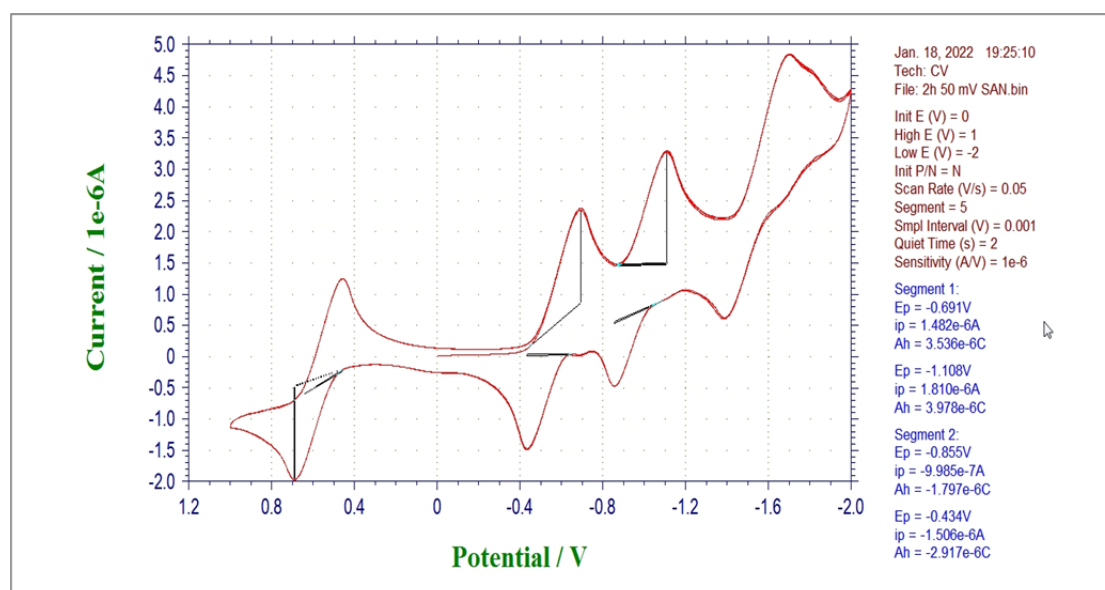

Cyclic voltammogram of compound **2h** (scanning rate: 50 mV s<sup>-1</sup>)

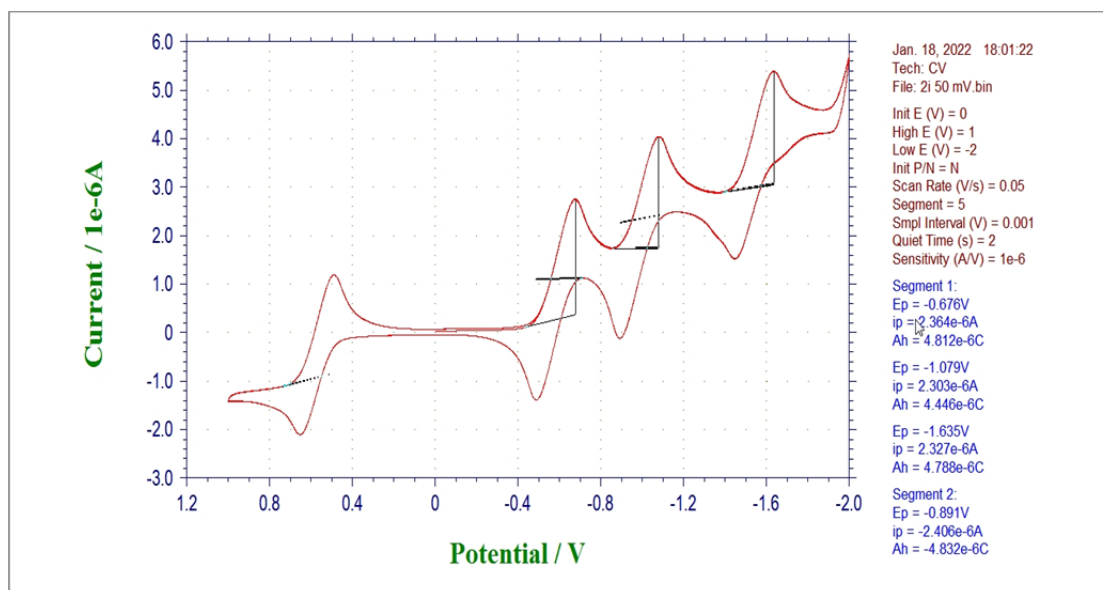

Cyclic voltammogram of compound **2i** (scanning rate: 50 mV s<sup>-1</sup>)

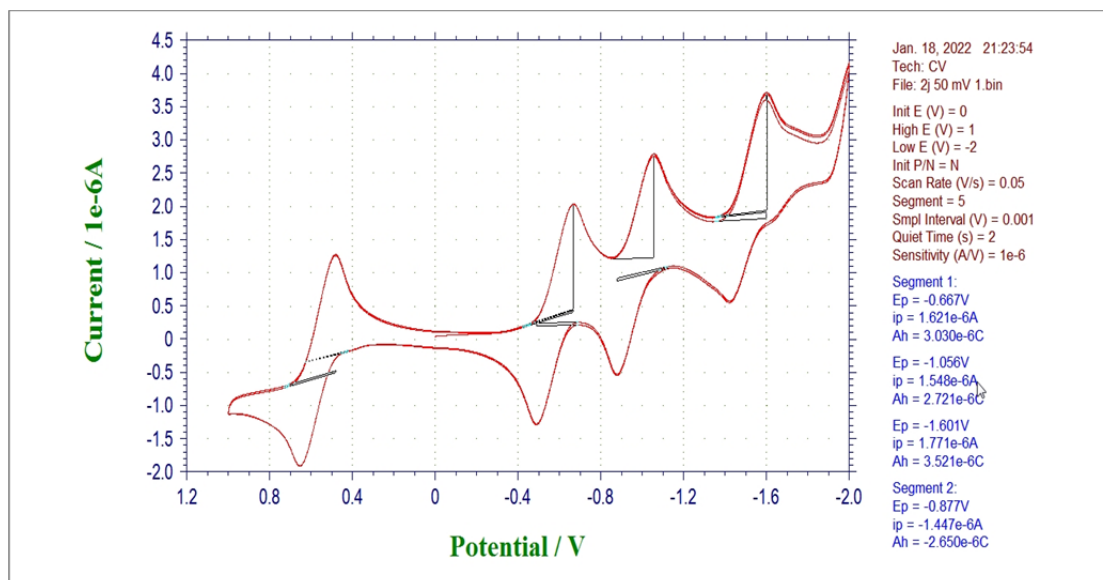

Cyclic voltammogram of compound **2j** (scanning rate: 50 mV s<sup>-1</sup>)

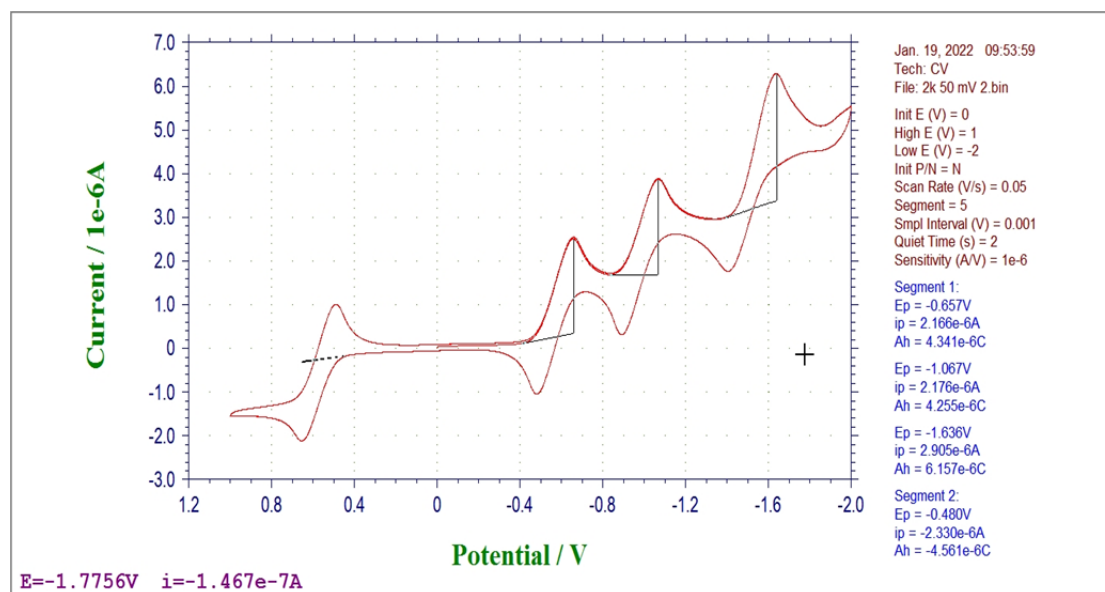

Cyclic voltammogram of compound **2k** (scanning rate: 50 mV s<sup>-1</sup>)

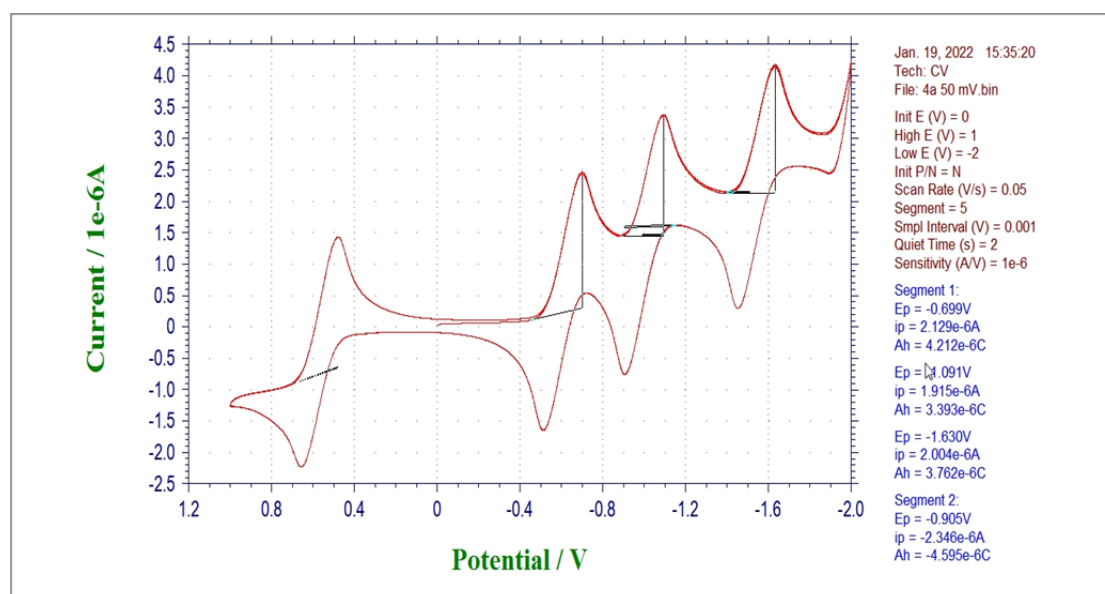

Cyclic voltammogram of compound **5a** (scanning rate: 50 mV s<sup>-1</sup>)

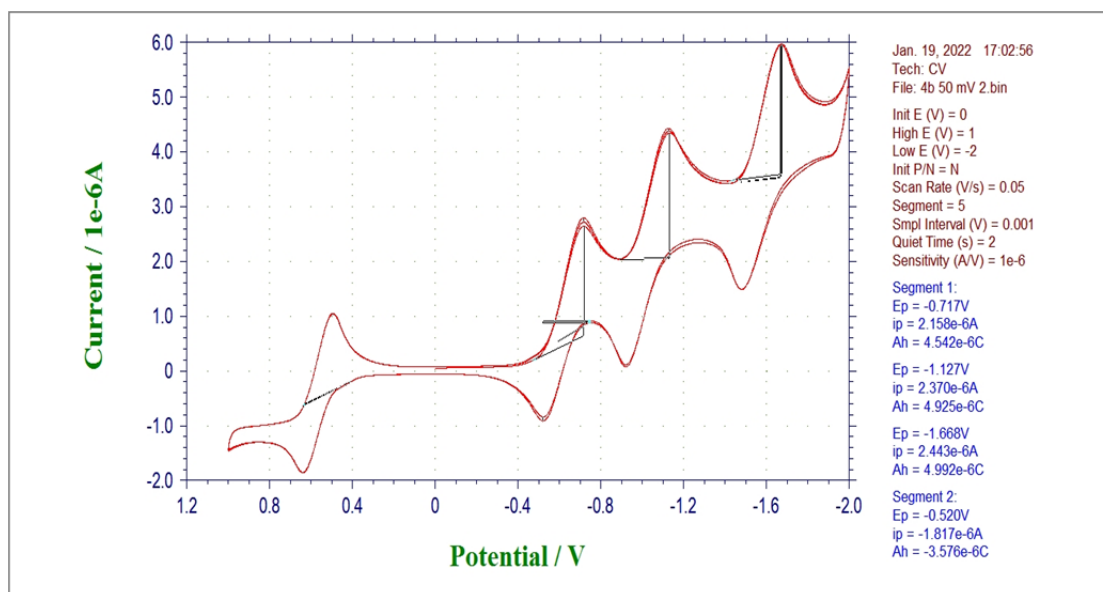

Cyclic voltammogram of compound **5b** (scanning rate: 50 mV s<sup>-1</sup>)

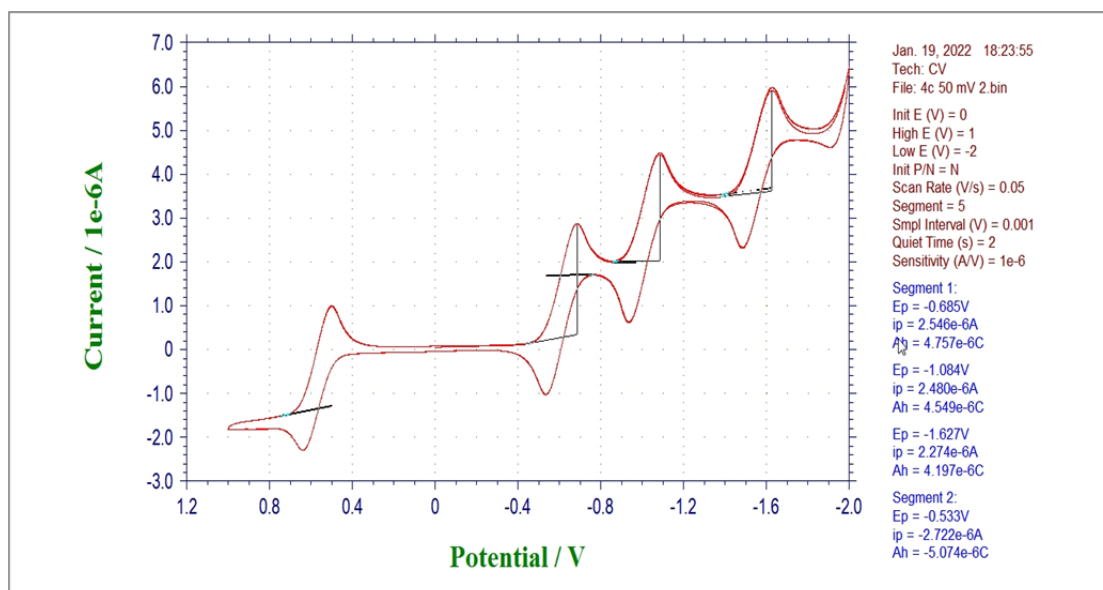

Cyclic voltammogram of compound **5c** (scanning rate: 50 mV s<sup>-1</sup>)

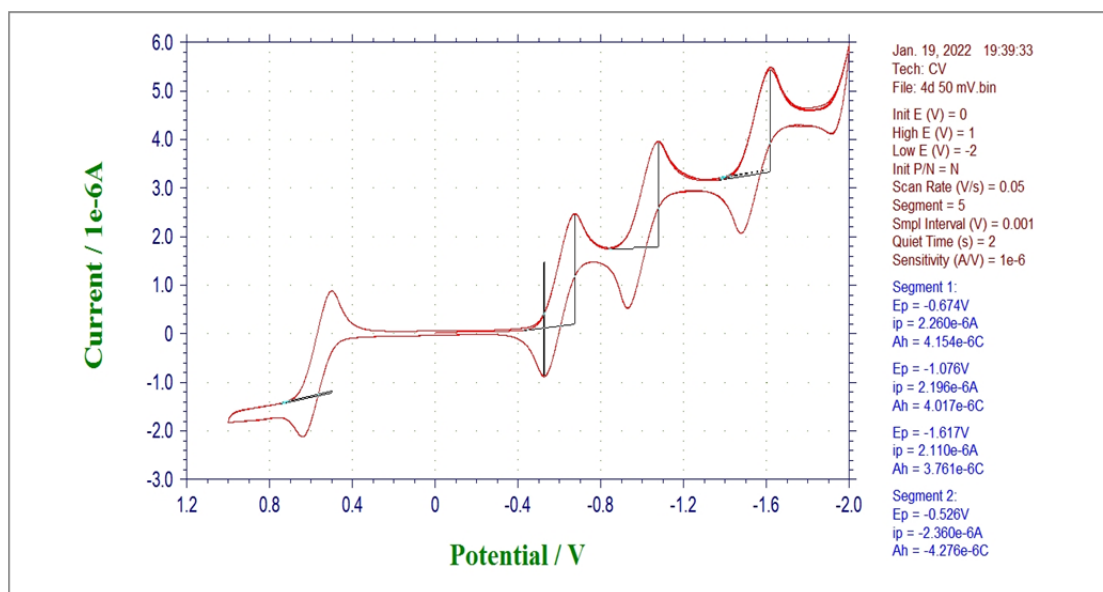

Cyclic voltammogram of compound **5d** (scanning rate: 50 mV s<sup>-1</sup>)

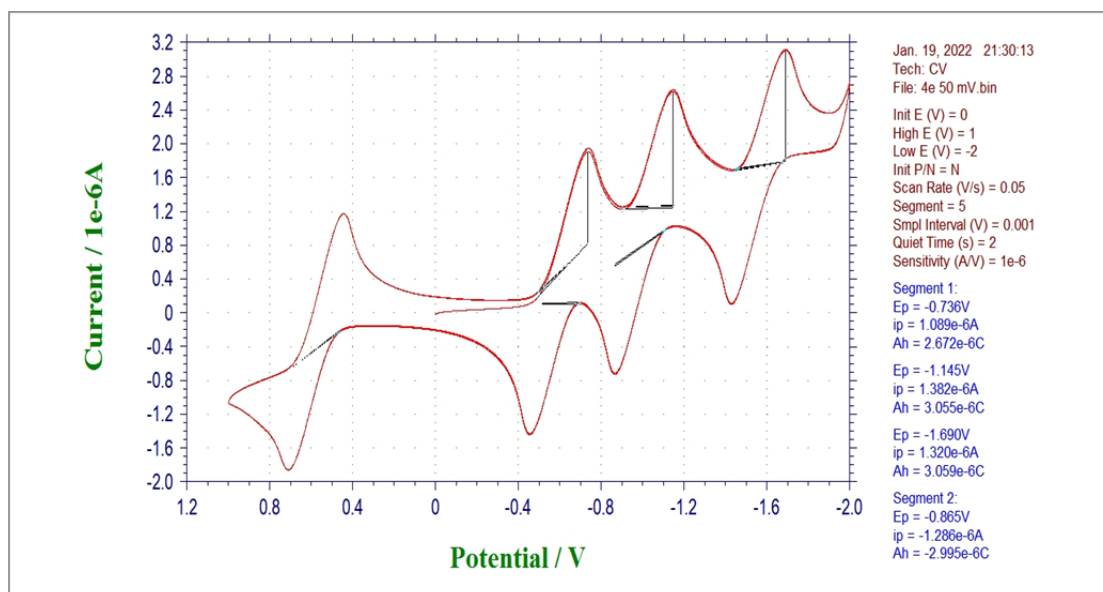

Cyclic voltammogram of compound **5e** (scanning rate: 50 mV s<sup>-1</sup>)

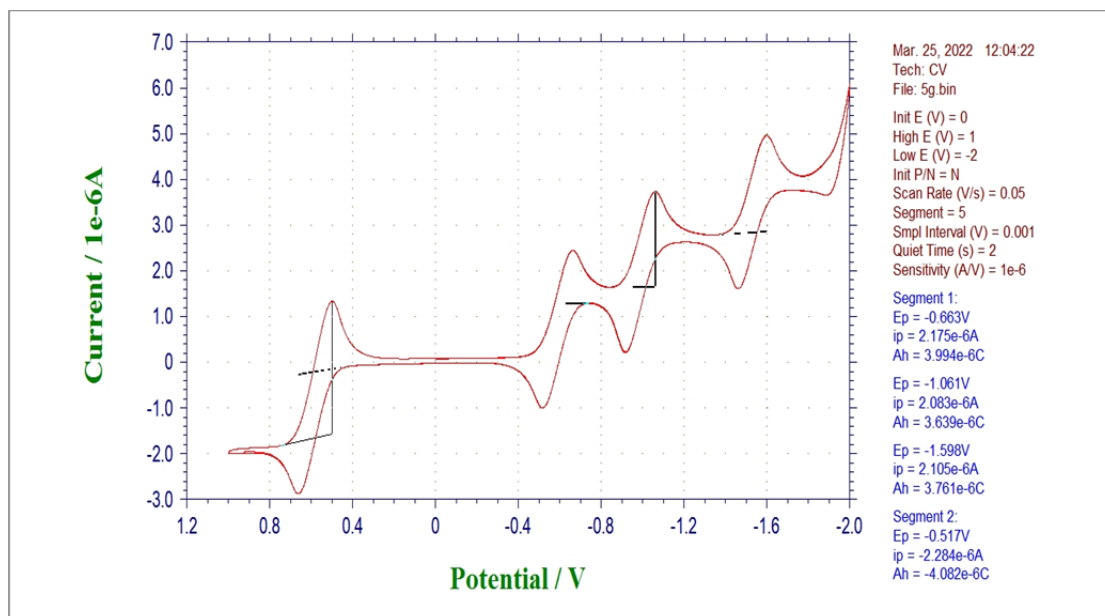

Cyclic voltammogram of compound **5f** (scanning rate: 50 mV s<sup>-1</sup>)

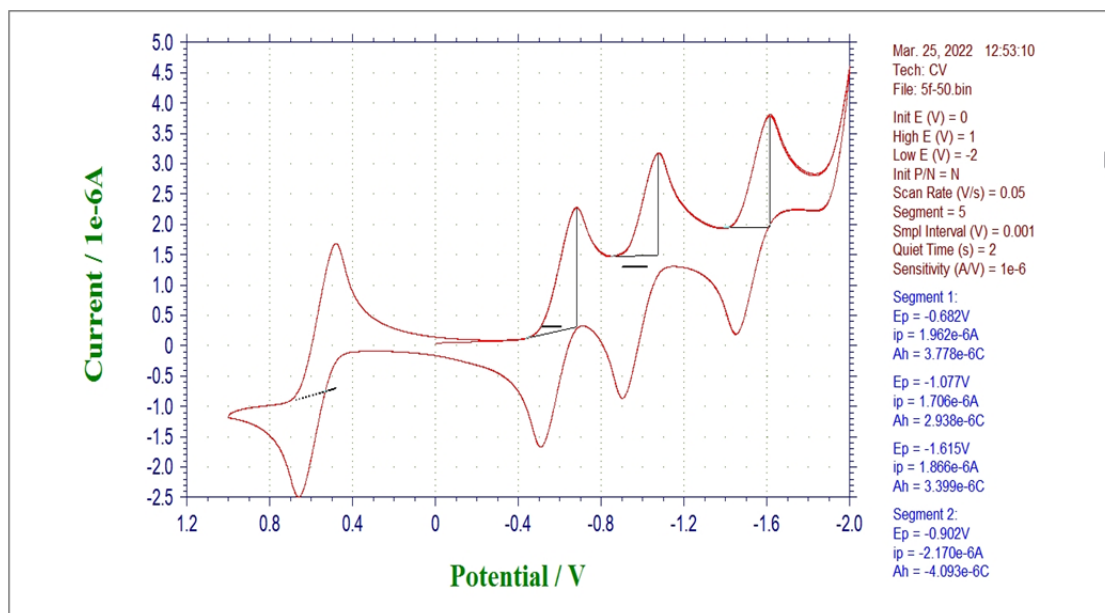

Cyclic voltammogram of compound **5g** (scanning rate: 50 mV s<sup>-1</sup>)

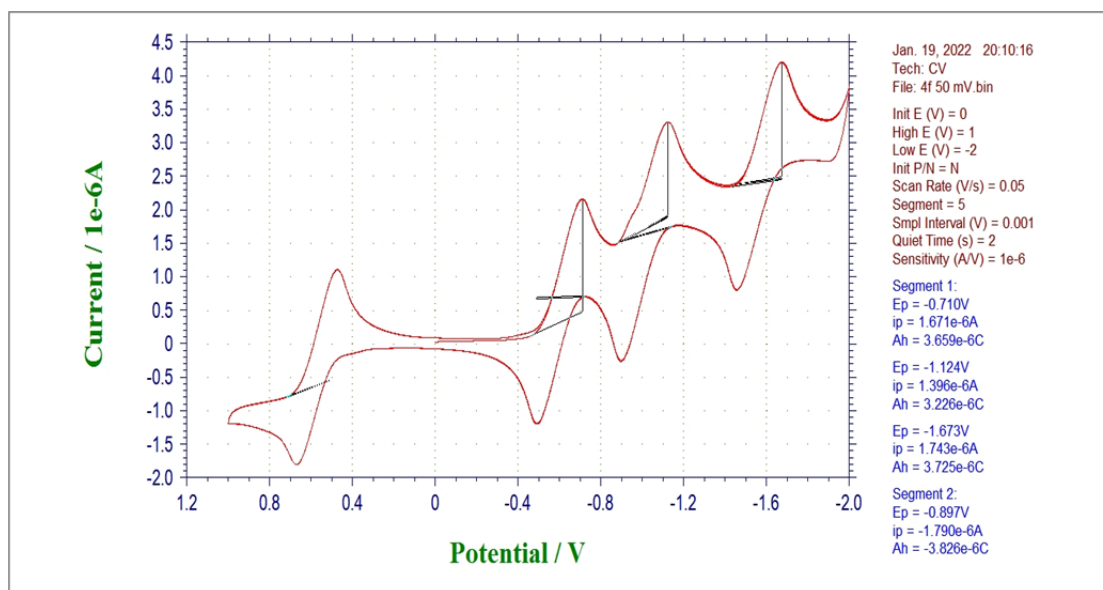

Cyclic voltammogram of compound **5h** (scanning rate: 50 mV s<sup>-1</sup>)

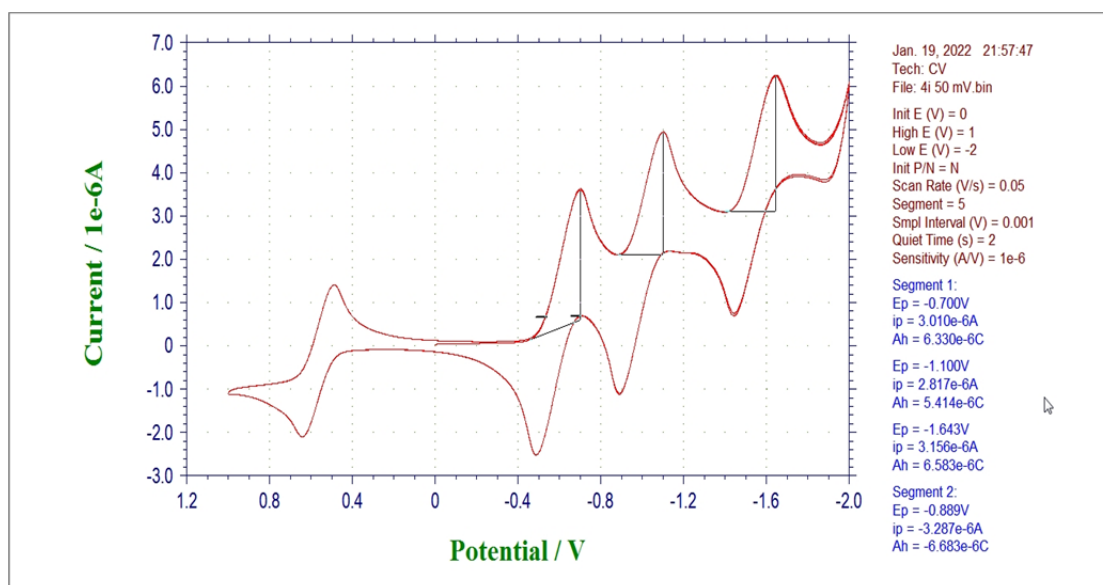

Cyclic voltammogram of compound **5i** (scanning rate: 50 mV s<sup>-1</sup>)

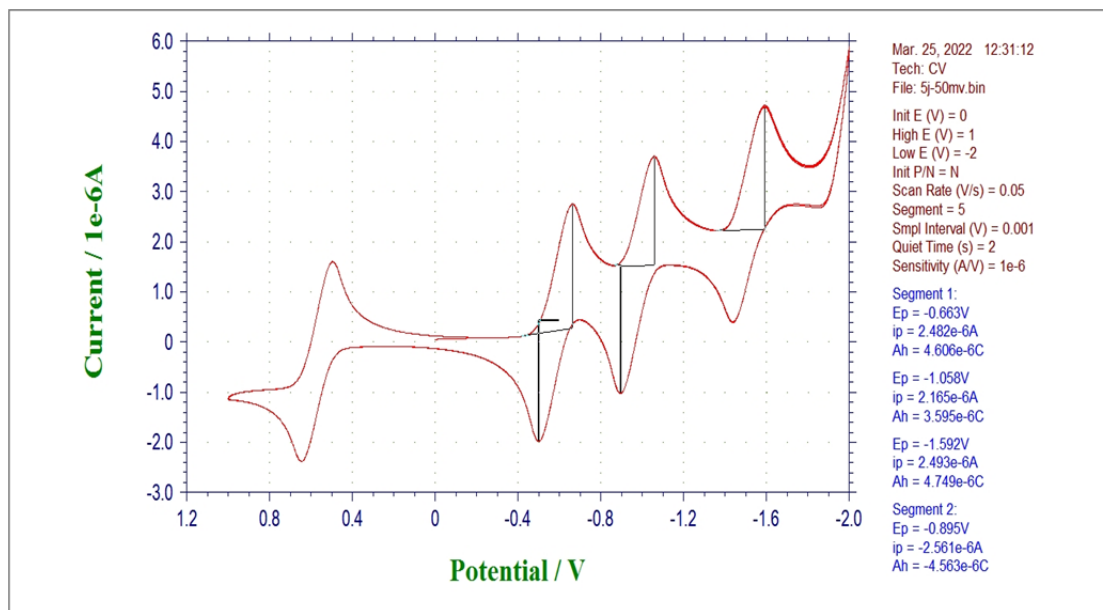

Cyclic voltammogram of compound **5j** (scanning rate: 50 mV s<sup>-1</sup>)

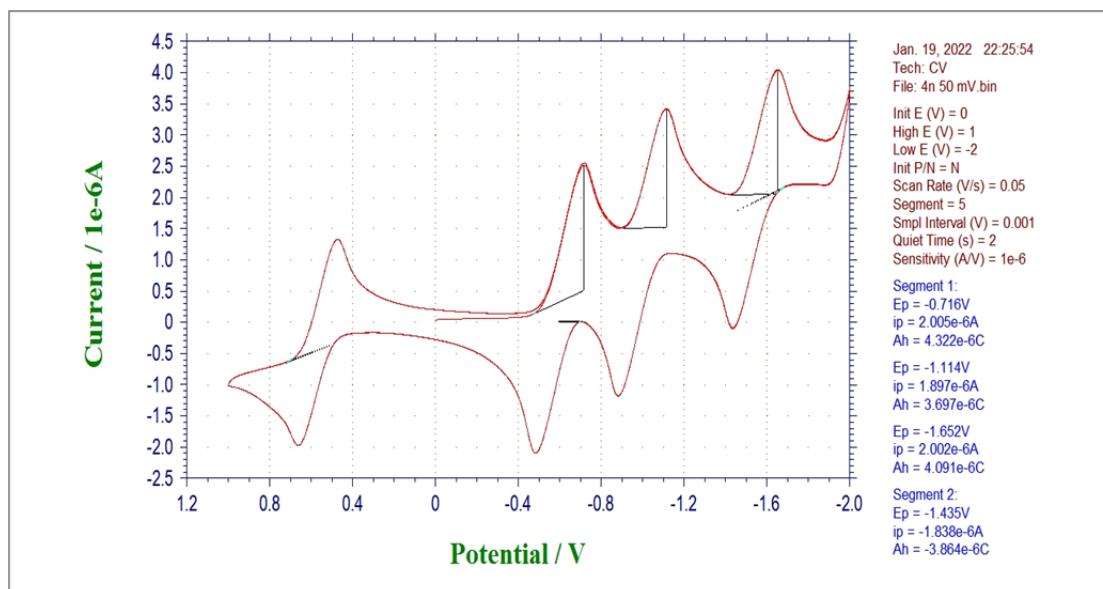

Cyclic voltammogram of compound **5k** (scanning rate: 50 mV s<sup>-1</sup>)

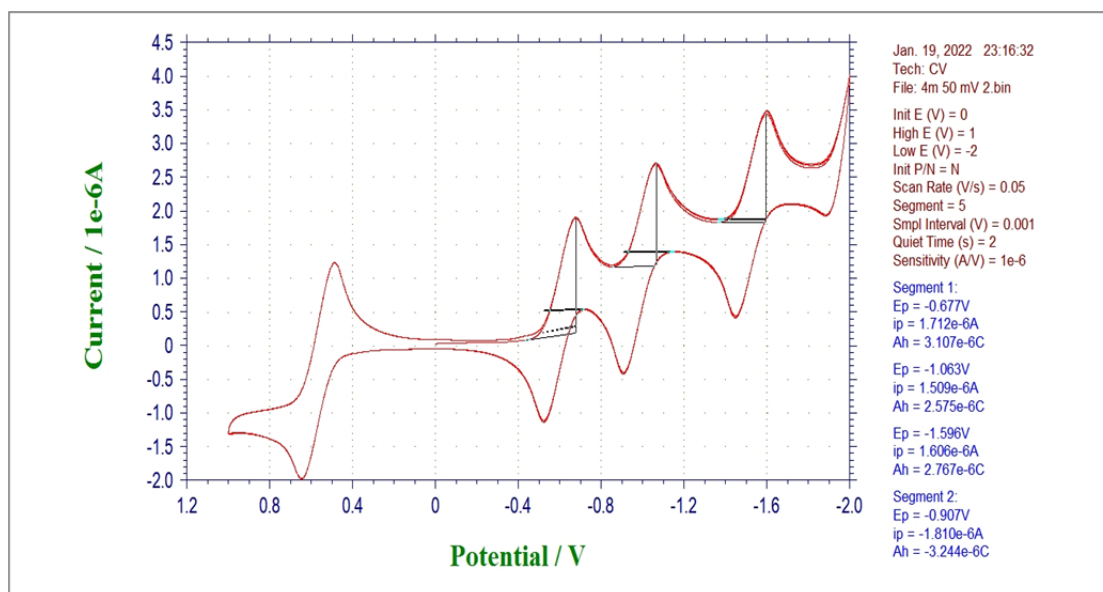

Cyclic voltammogram of compound **5I** (scanning rate: 50 mV s<sup>-1</sup>)

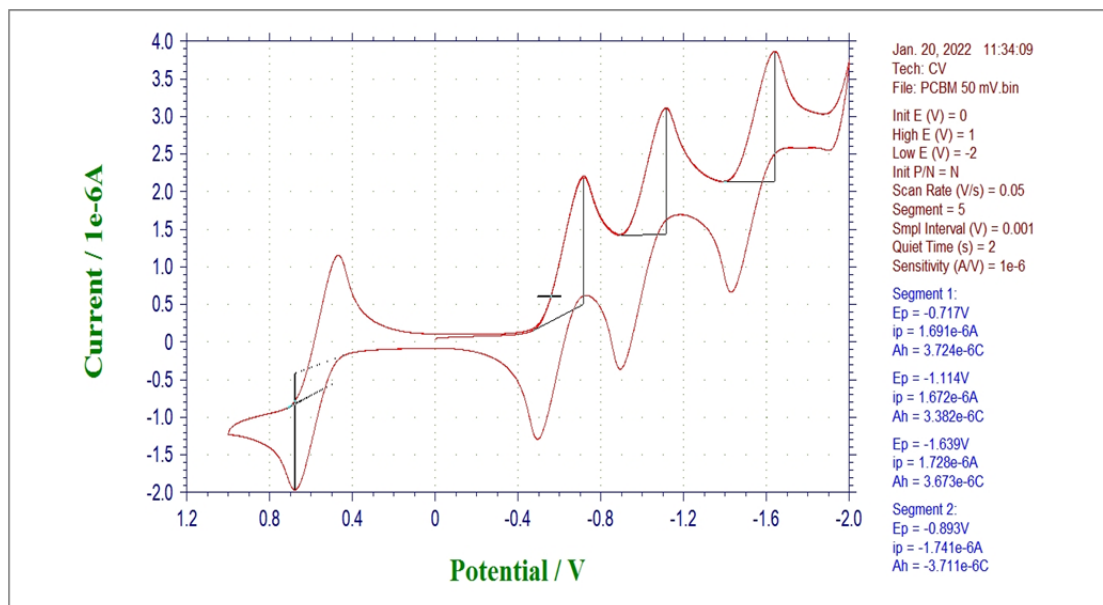

Cyclic voltammogram of compound **PCBM** (scanning rate: 50 mV s<sup>-1</sup>)

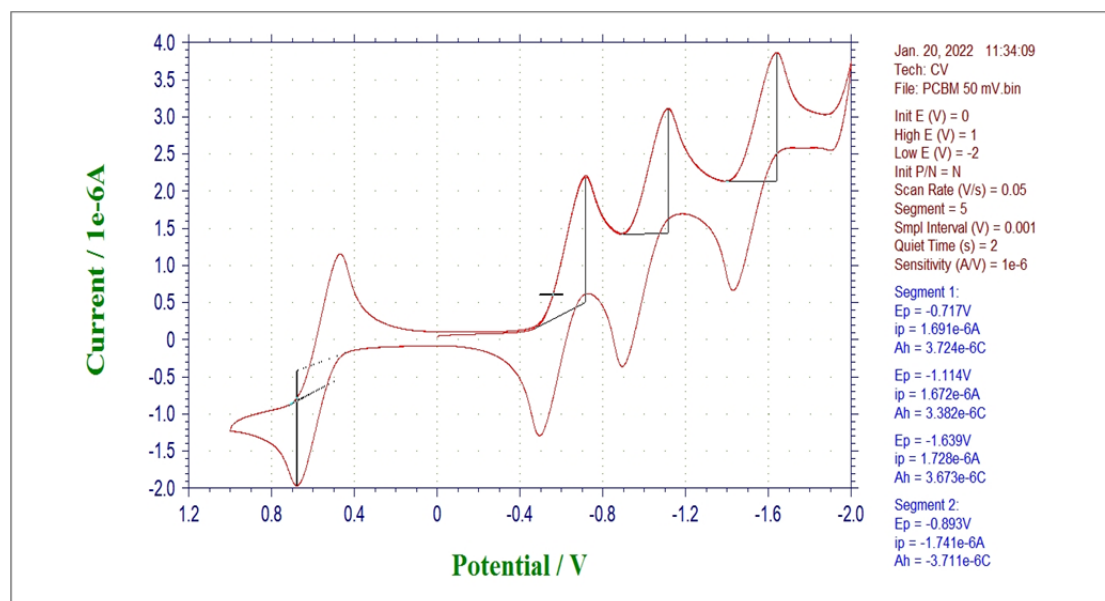

Cyclic voltammogram of compound C<sub>60</sub> (scanning rate: 50 mV s<sup>-1</sup>)

## 8. Spectral Data for All Compounds

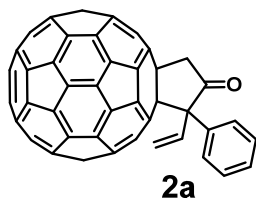

Spectral data of **2a**: the mixture was separated and purified by silica gel column chromatography with CS<sub>2</sub> as the eluent to give unreacted C<sub>60</sub> and **2a** (25.5 mg, 58%); amorphous brown solid; <sup>1</sup>H NMR (600 MHz, CDCl<sub>3</sub>/CS<sub>2</sub>) 7.75 (dd, *J* = 17.4, 10.8 Hz, 1H), 7.67 (d, *J* = 7.2 Hz, 2H), 7.33 (t, *J* = 7.8 Hz, 2H), 7.24–7.22 (m, 1H), 5.90 (d, *J* = 10.2 Hz, 1H), 5.70 (d, *J* = 17.4 Hz, 1H), 4.91 (d, *J* = 17.4 Hz, 1H), 4.26 (d, *J* = 17.4 Hz, 1H); <sup>13</sup>C{<sup>1</sup>H} NMR (150 MHz, CDCl<sub>3</sub>/CS<sub>2</sub> with Cr(acac)<sub>3</sub> as relaxation reagent) δ 207.8, 156.6, 155.3, 153.5, 151.9, 147.64, 147.59, 146.41, 146.37, 146.31, 146.29, 146.26, 146.12, 146.07, 146.01, 145.97, 145.7, 145.61, 145.58, 145.5, 145.4, 145.3, 145.2, 144.8, 144.6, 144.5, 144.4, 143.9, 143.2, 142.70, 142.66, 142.5, 142.13, 142.10, 142.0, 141.99, 141.98, 141.82, 141.79, 141.7, 141.5, 141.4, 141.1, 140.5, 140.1, 139.6, 139.2, 139.1, 137.1, 135.6, 134.7, 134.1, 131.0, 128.1, 127.7, 122.0, 76.3, 68.5, 61.5, 49.4; FT-IR ν/cm<sup>-1</sup> 1744, 1509, 1259, 1092, 1014, 793, 688, 524; UV-vis (CHCl<sub>3</sub>) λ<sub>max</sub>/nm 255, 315, 434, 701; MALDI-TOF MS *m/z* calcd for C<sub>71</sub>H<sub>10</sub>O [M]<sup>+</sup> 878.0737, found 878.0736.

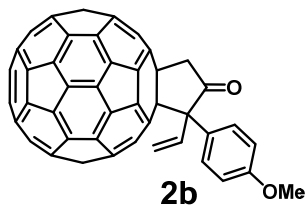

Spectral data of **2b**: the mixture was separated and purified by silica gel column chromatography with CS<sub>2</sub> as the eluent to recover unreacted C<sub>60</sub>, and then the eluent was switched to CS<sub>2</sub>/DCM (v/v = 5:1) to give **2b** (18.4 mg, 40%); amorphous brown solid; <sup>1</sup>H NMR (600 MHz, CDCl<sub>3</sub>/CS<sub>2</sub>) δ 7.72 (dd, *J* = 17.4, 10.2 Hz, 1H), 7.58 (d, *J* = 6.6, 1.8 Hz, 2H), 6.84 (d, *J* = 7.2, 1.8 Hz, 2H), 5.87 (d, *J* = 10.8 Hz, 1H), 5.68 (d, *J* = 17.4 Hz, 1H), 4.89 (d, *J* = 17.4 Hz, 1H), 4.25 (d, *J* = 17.4 Hz, 1H), 3.76 (s, 3H); <sup>13</sup>C{<sup>1</sup>H} NMR (150 MHz, CDCl<sub>3</sub>/CS<sub>2</sub> with Cr(acac)<sub>3</sub> as relaxation reagent) δ 208.4, 158.6, 156.7, 155.1, 153.6, 152.0, 147.6, 147.5, 146.31, 146.28, 146.22, 146.20, 146.18, 146.02, 145.98, 145.9, 145.6, 145.58, 145.57, 145.5, 145.32, 145.28, 145.22, 145.18, 145.1, 144.7, 144.5, 144.40, 144.36, 143.8, 143.1, 142.6, 142.58, 142.56, 142.4, 142.04, 142.02, 141.92, 141.89, 141.7, 141.69, 141.66, 141.4, 141.3, 141.1, 140.4, 140.0, 139.8, 139.6, 139.1, 137.0, 135.5, 134.5, 134.1, 132.1, 131.0, 121.8, 113.4, 76.5, 68.1, 61.3, 55.0, 49.3; FT-IR ν/cm<sup>-1</sup> 1736, 1508, 1247, 1179, 1005, 791, 523; UV-vis (CHCl<sub>3</sub>) λ<sub>max</sub>/nm 257, 315, 435, 702; MALDI-TOF MS *m/z* calcd for C<sub>72</sub>H<sub>12</sub>O<sub>2</sub> [M]<sup>-</sup> 908.0843, found 908.0840.

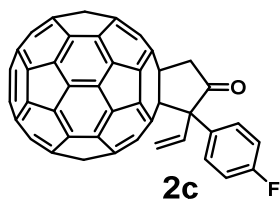

Spectral data of **2c**: the mixture was separated and purified by silica gel column chromatography with CS<sub>2</sub> as the eluent to give unreacted C<sub>60</sub> and **2c** (25.5 mg, 57%); amorphous brown solid; <sup>1</sup>H NMR (600 MHz, CDCl<sub>3</sub>/CS<sub>2</sub>) δ 7.77 (dd, *J* = 17.4, 10.2 Hz, 1H), 7.68 (dd, *J* = 9.0, 5.4 Hz, 2H), 7.03 (t, *J* = 9.0 Hz, 2H), 5.92 (d, *J* = 10.2 Hz,

1H), 5.69 (d,  $J = 17.4$  Hz, 1H), 4.91 (d,  $J = 17.4$  Hz, 1H), 4.26 (d,  $J = 17.4$  Hz, 1H);  $^{13}\text{C}\{^1\text{H}\}$  NMR (150 MHz,  $\text{CDCl}_3/\text{CS}_2$  with  $\text{Cr}(\text{acac})_3$  as relaxation reagent)  $\delta$  207.0, 161.7 ( $J_{\text{C-F}} = 248.0$  Hz), 156.3, 154.9, 153.0, 151.5, 147.52, 147.46, 146.3, 146.23, 146.2, 146.16, 146.15, 146.0, 145.9, 145.8, 145.7, 145.6, 145.5, 145.4, 145.33, 145.25, 145.22, 145.20, 145.15, 144.6, 144.4, 144.34, 144.28, 143.6, 143.1, 142.58, 142.57, 142.5, 142.4, 142.0, 141.9, 141.88, 141.86, 141.8, 141.7, 141.6, 141.32, 141.28, 141.0, 140.4, 140.1, 139.6, 139.5, 139.1, 137.1, 135.4, 134.8, 134.6, 133.9, 132.7, 132.6, 122.2, 115.0, 114.8, 76.0, 67.7, 61.2, 49.1;  $^{19}\text{F}$  NMR (377 MHz,  $\text{CDCl}_3/\text{CS}_2$ )  $\delta$ : -112.4; FT-IR  $\nu/\text{cm}^{-1}$  1742, 1506, 1221, 1163, 979, 932, 801, 764, 524; UV-vis ( $\text{CHCl}_3$ )  $\lambda_{\text{max}}/\text{nm}$  258, 315, 434, 700; MALDI-TOF MS  $m/z$  calcd for  $\text{C}_{71}\text{H}_9\text{OF}$   $[\text{M}]^-$  896.0643, found 896.0641.

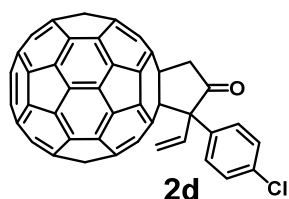

Spectral data of **2d**: the mixture was separated and purified by silica gel column chromatography with  $\text{CS}_2$  as the eluent to give unreacted  $\text{C}_{60}$  and **2d** (22.7 mg, 49%); amorphous brown solid;  $^1\text{H}$  NMR (400 MHz,  $\text{CDCl}_3/\text{CS}_2$ )  $\delta$  7.75 (dd,  $J = 17.2$ , 10.4 Hz, 1H), 7.63 (d,  $J = 8.8$  Hz, 2H), 7.31 (d,  $J = 8.8$  Hz, 2H), 5.91 (d,  $J = 10.4$  Hz, 1H), 5.68 (d,  $J = 17.2$  Hz, 1H), 4.90 (d,  $J = 17.6$  Hz, 1H), 4.25 (d,  $J = 17.6$  Hz, 1H);  $^{13}\text{C}\{^1\text{H}\}$  NMR (150 MHz,  $\text{CDCl}_3/\text{CS}_2$  with  $\text{Cr}(\text{acac})_3$  as relaxation reagent)  $\delta$  207.4, 156.2, 154.8, 152.8, 151.4, 147.5, 147.4, 146.24, 146.20, 146.17, 146.1, 146.0, 145.9, 145.7, 145.6, 145.5, 145.44, 145.39, 145.3, 145.23, 145.20, 145.16, 145.1, 114.6, 144.4,

144.3, 144.2, 143.6, 143.1, 142.54, 142.53, 142.5, 142.4, 141.94, 141.9, 141.84, 141.81, 141.78, 141.63, 141.61, 141.26, 141.25, 140.9, 140.4, 140.0, 139.5, 139.3, 139.1, 137.5, 137.1, 135.3, 134.6, 133.8, 132.2, 128.1, 122.3, 75.9, 67.8, 61.3, 49.1; FT-IR  $\nu/\text{cm}^{-1}$  1745, 1489, 1400, 1186, 1092, 1014, 989, 935, 796, 525; UV-vis ( $\text{CHCl}_3$ )  $\lambda_{\text{max}}/\text{nm}$  259, 316, 434, 700; MALDI-TOF MS  $m/z$  calcd for  $\text{C}_{71}\text{H}_9\text{OCl}$   $[\text{M}]^-$  912.0347, found 912.0342.

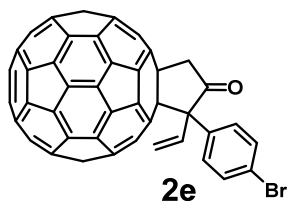

Spectral data of **2e**: the mixture was separated and purified by silica gel column chromatography with  $\text{CS}_2$  as the eluent to give unreacted  $\text{C}_{60}$  and **2e** (26.0 mg, 54%); amorphous brown solid;  $^1\text{H}$  NMR (600 MHz,  $\text{CDCl}_3/\text{CS}_2$ )  $\delta$  7.76 (dd,  $J = 17.2, 10.8$  Hz, 1H), 7.58 (d,  $J = 9.0$  Hz, 2H), 7.48 (d,  $J = 9.0$  Hz, 2H), 5.92 (d,  $J = 10.8$  Hz, 1H), 5.68 (d,  $J = 17.4$  Hz, 1H), 4.91 (d,  $J = 17.4$  Hz, 1H), 4.26 (d,  $J = 17.6$  Hz, 1H);  $^{13}\text{C}\{^1\text{H}\}$  NMR (150 MHz,  $\text{CDCl}_3/\text{CS}_2$  with  $\text{Cr}(\text{acac})_3$  as relaxation reagent)  $\delta$  208.0, 156.4, 155.0, 153.0, 151.5, 147.7, 147.6, 146.41, 146.37, 146.34, 146.31, 146.13, 146.11, 145.9, 145.7, 145.64, 145.60, 145.56, 145.5, 145.4, 145.38, 145.37, 145.33, 145.28, 145.25, 144.8, 144.6, 144.5, 144.4, 143.8, 143.2, 142.71, 142.69, 142.67, 142.5, 142.11, 142.07, 142.01, 141.97, 141.9, 141.8, 141.76, 141.43, 141.41, 141.1, 140.5, 140.11, 139.7, 139.4, 139.3, 138.2, 137.2, 135.5, 134.8, 133.9, 132.7, 131.2, 122.5, 122.2, 76.0, 68.0, 61.5, 49.3; FT-IR  $\nu/\text{cm}^{-1}$  1745, 1485, 1185, 1009, 936, 795, 525;

UV-vis ( $\text{CHCl}_3$ )  $\lambda_{\text{max}}/\text{nm}$  256, 318, 434, 699; MALDI-TOF MS  $m/z$  calcd for  $\text{C}_{71}\text{H}_9\text{OBr}$   $[\text{M}]^-$  955.9842, found 957.9825.

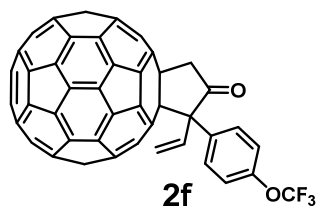

Spectral data of **2f**: the mixture was separated and purified by silica gel column chromatography with  $\text{CS}_2$  as the eluent to give unreacted  $\text{C}_{60}$  and **2f** (23.7 mg, 49%); amorphous brown solid;  $^1\text{H}$  NMR (400 MHz,  $\text{CDCl}_3/\text{CS}_2$ )  $\delta$  7.82–7.75 (m, 3H), 7.22 (d,  $J = 8.4$  Hz, 2H), 5.95 (d,  $J = 10.4$  Hz, 1H), 5.72 (d,  $J = 17.2$  Hz, 1H), 4.95 (d,  $J = 17.6$  Hz, 1H), 4.29 (d,  $J = 17.6$  Hz, 1H);  $^{13}\text{C}\{^1\text{H}\}$  NMR (150 MHz,  $\text{CDCl}_3/\text{CS}_2$  with  $\text{Cr}(\text{acac})_3$  as relaxation reagent)  $\delta$  207.8, 156.3, 154.9, 152.9, 151.4, 148.4, 147.7, 147.6, 146.39, 146.36, 146.32, 146.29, 146.12, 146.09, 145.9, 145.64, 145.57, 145.54, 145.46, 145.37, 145.35, 145.34, 145.26, 145.2, 144.7, 144.54, 144.47, 144.4, 143.8, 143.2, 142.7, 142.68, 142.66, 142.5, 142.09, 142.08, 142.04, 142.00, 141.97, 141.9, 141.79, 141.76, 141.4, 141.1, 140.5, 140.2, 139.7, 139.4, 139.1, 137.7, 137.3, 135.5, 134.8, 133.9, 132.5, 122.6, 120.24 ( $J_{\text{C-F}} = 256.2$  Hz), 120.21, 76.0, 67.9, 61.5, 49.3;  $^{19}\text{F}$  NMR (565 MHz,  $\text{CDCl}_3/\text{CS}_2$ )  $\delta$ : -57.5; FT-IR  $\nu/\text{cm}^{-1}$  1744, 1506, 1248, 1207, 1156, 935, 796, 524; UV-vis ( $\text{CHCl}_3$ )  $\lambda_{\text{max}}/\text{nm}$  257, 316, 434, 701; MALDI-TOF MS  $m/z$  calcd for  $\text{C}_{72}\text{H}_9\text{O}_2\text{F}_3$   $[\text{M}]^-$  962.0560, found 962.0569.

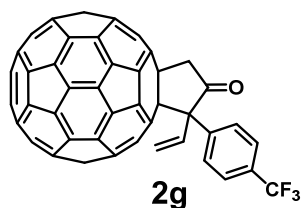

Spectral data of **2g**: the mixture was separated and purified by silica gel column chromatography with CS<sub>2</sub> as the eluent to give unreacted C<sub>60</sub> and **2g** (23.7 mg, 50%); amorphous brown solid; <sup>1</sup>H NMR (400 MHz, CDCl<sub>3</sub>/CS<sub>2</sub>) δ 7.85 (d, *J* = 7.6 Hz, 2H), 7.81 (dd, *J* = 17.2, 10.4 Hz, 1H), 7.61 (d, *J* = 8.0 Hz, 2H), 5.96 (d, *J* = 10.4 Hz, 1H), 5.68 (d, *J* = 17.2 Hz, 1H), 4.94 (d, *J* = 17.6 Hz, 1H), 4.29 (d, *J* = 17.6 Hz, 1H); <sup>13</sup>C{<sup>1</sup>H} NMR (150 MHz, CDCl<sub>3</sub>/CS<sub>2</sub> with Cr(acac)<sub>3</sub> as relaxation reagent) δ 207.6, 156.2, 154.9, 152.6, 151.2, 147.7, 147.6, 146.40, 146.36, 146.34, 146.31, 146.13, 146.11, 145.8, 145.7, 145.6, 145.54, 145.49, 145.4, 145.37, 145.35, 145.29, 145.26, 145.1, 144.8, 144.54, 144.48, 144.3, 143.7, 143.24, 143.22, 143.17, 142.72, 142.69, 142.68, 142.5, 142.10, 142.07, 142.04, 142.01, 141.96, 141.9, 141.8, 141.78, 141.75, 141.41, 141.38, 141.0, 140.5, 140.2, 139.7, 139.3, 139.2, 137.3, 135.5, 134.9, 133.9, 131.5, 129.7 (*J*<sub>C-F</sub> = 32.6 Hz), 124.91, 124.89, 123.8 (*J*<sub>C-F</sub> = 270.8 Hz), 122.8, 75.8, 68.1, 61.6, 49.3; <sup>19</sup>F NMR (565 MHz, CDCl<sub>3</sub>/CS<sub>2</sub>) δ: -62.3; FT-IR ν/cm<sup>-1</sup> 1745, 1512, 1323, 1162, 1118, 1069, 812, 525; UV-vis (CHCl<sub>3</sub>) λ<sub>max</sub>/nm 256, 316, 434, 699; MALDI-TOF MS *m/z* calcd for C<sub>72</sub>H<sub>9</sub>OF<sub>3</sub> [M]<sup>-</sup> 946.0611, found 962.0617.

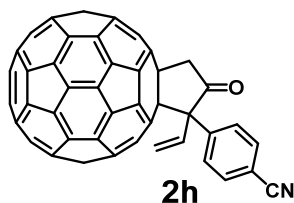

Spectral data of **2h**: the mixture was separated and purified by silica gel column chromatography with CS<sub>2</sub> as the eluent to recover unreacted C<sub>60</sub>, and then the eluent was switched to CS<sub>2</sub>/DCM (v/v = 4:1) to give **2h** (23.5 mg, 52%); amorphous brown solid; <sup>1</sup>H NMR (600 MHz, CDCl<sub>3</sub>/CS<sub>2</sub>) δ 7.86 (d, *J* = 8.4 Hz, 2H), 7.80 (dd, *J* = 17.4,

10.8 Hz 1H), 7.66 (d,  $J = 8.4$  Hz, 2H), 5.97 (d,  $J = 10.8$  Hz, 1H), 5.68 (d,  $J = 17.4$  Hz, 1H), 4.94 (d,  $J = 17.4$  Hz, 1H), 4.29 (d,  $J = 17.4$  Hz, 1H);  $^{13}\text{C}\{^1\text{H}\}$  NMR (150 MHz,  $\text{CDCl}_3/\text{CS}_2$  with  $\text{Cr}(\text{acac})_3$  as relaxation reagent)  $\delta$  206.7, 155.9, 154.6, 152.1, 150.8, 147.6, 147.5, 146.33, 146.28, 146.25, 146.1, 146.0, 145.7, 145.6, 145.44, 145.43, 145.36, 145.34, 145.31, 145.30, 145.27, 145.23, 145.21, 144.8, 144.7, 144.43, 144.40, 144.3, 144.2, 143.6, 143.2, 142.7, 142.65, 142.62, 142.5, 142.03, 141.98, 141.94, 141.93, 141.9, 141.8, 141.74, 141.68, 141.66, 141.4, 141.3, 140.9, 140.5, 140.2, 139.7, 139.1, 138.9, 137.3, 135.3, 134.9, 133.7, 131.7, 131.6, 123.0, 118.0, 111.7, 75.5, 67.9, 61.4, 49.2; FT-IR  $\nu/\text{cm}^{-1}$  1742, 1501, 1261, 1093, 1004, 935, 806, 524; UV-vis ( $\text{CHCl}_3$ )  $\lambda_{\text{max}}/\text{nm}$  256, 316, 433, 605, 699; MALDI-TOF MS  $m/z$  calcd for  $\text{C}_{72}\text{H}_9\text{ON}$   $[\text{M}]^-$  903.0690, found 903.0684.

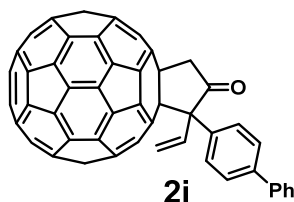

Spectral data of **2i**: the mixture was separated and purified by silica gel column chromatography with  $\text{CS}_2$  as the eluent to give unreacted  $\text{C}_{60}$  and **2i** (28.5 mg, 58%); amorphous brown solid;  $^1\text{H}$  NMR (600 MHz,  $\text{CDCl}_3/\text{CS}_2$ )  $\delta$  7.78 (dd,  $J = 17.4$ , 10.8 Hz, 1H), 7.74 (d,  $J = 8.4$  Hz, 2H), 7.56 (d,  $J = 8.4$  Hz, 2H), 7.52 (dd,  $J = 8.4$ , 1.2 Hz, 2H), 7.36 (t,  $J = 7.8$  Hz, 2H), 7.27 (t,  $J = 7.8$  Hz, 1H), 5.92 (d,  $J = 10.8$  Hz, 1H), 5.72 (d,  $J = 17.4$  Hz, 1H), 4.92 (d,  $J = 17.4$  Hz, 1H), 4.28 (d,  $J = 17.4$  Hz, 1H);  $^{13}\text{C}\{^1\text{H}\}$  NMR (150 MHz,  $\text{CDCl}_3/\text{CS}_2$  with  $\text{Cr}(\text{acac})_3$  as relaxation reagent)  $\delta$  208.1, 156.5, 155.1, 153.3, 151.8, 147.53, 147.48, 146.29, 146.26, 146.19, 146.17, 146.1, 145.99,

145.96, 145.8, 145.54, 145.51, 145.49, 145.3, 145.20, 145.15, 145.13, 144.6, 144.5, 144.4, 144.3, 143.8, 143.11, 143.09, 142.6, 142.5, 142.4, 141.99, 141.97, 141.90, 141.87, 141.7, 141.67, 141.66, 141.4, 141.3, 141.0, 140.4, 140.1, 140.03, 140.02, 139.6, 139.5, 139.1, 138.1, 137.0, 135.5, 134.7, 134.0, 131.3, 128.7, 127.4, 126.9, 126.6, 122.0, 76.3, 68.2, 61.4, 49.3; FT-IR  $\nu/\text{cm}^{-1}$  1742, 1484, 1181, 1142, 934, 901, 812, 759, 724, 693, 524; UV-vis ( $\text{CHCl}_3$ )  $\lambda_{\text{max}}/\text{nm}$  259, 315, 435, 701; MALDI-TOF MS  $m/z$  calcd for  $\text{C}_{77}\text{H}_{14}\text{O}$   $[\text{M}]^-$  954.1050, found 954.1048.

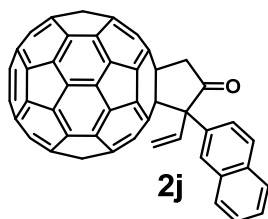

Spectral data of **2j**: the mixture was separated and purified by silica gel column chromatography with  $\text{CS}_2$  as the eluent to give unreacted  $\text{C}_{60}$  and **2j** (26.4 mg, 57%); amorphous brown solid;  $^1\text{H}$  NMR (400 MHz,  $\text{CDCl}_3/\text{CS}_2$ )  $\delta$  8.21 (s, 1H), 7.89–7.75 (m, 5H), 7.46–7.42 (m, 2H), 5.96 (d,  $J = 10.4$  Hz, 1H), 5.73 (d,  $J = 17.2$  Hz, 1H), 4.98 (d,  $J = 17.6$  Hz, 1H), 4.35 (d,  $J = 17.6$  Hz, 1H);  $^{13}\text{C}\{^1\text{H}\}$  NMR (150 MHz,  $\text{CDCl}_3/\text{CS}_2$  with  $\text{Cr}(\text{acac})_3$  as relaxation reagent)  $\delta$  208.4, 156.5, 155.3, 153.3, 152.0, 147.61, 147.56, 146.37, 146.35, 146.27, 146.25, 146.2, 146.1, 146.03, 145.97, 145.9, 145.64, 145.61, 145.6, 145.5, 145.4, 145.34, 145.31, 145.26, 145.2, 144.7, 144.6, 144.5, 144.3, 143.9, 143.20, 143.16, 142.7, 142.63, 142.60, 142.5, 142.1, 142.04, 141.99, 141.95, 141.8, 141.7, 141.4, 141.3, 141.1, 140.5, 140.1, 139.7, 139.6, 139.1, 137.1, 136.6, 135.5, 134.8, 134.1, 132.7, 132.3, 130.5, 128.6, 128.4, 127.6, 127.5, 126.6, 126.1,

122.2, 76.4, 68.6, 61.6, 49.5; FT-IR  $\nu/\text{cm}^{-1}$  1742, 1501, 1143, 933, 798, 735, 525;  
 UV-vis ( $\text{CHCl}_3$ )  $\lambda_{\text{max}}/\text{nm}$  254, 315, 434, 702; MALDI-TOF MS  $m/z$  calcd for  $\text{C}_{75}\text{H}_{12}\text{O}$   
 $[\text{M}]^-$  928.0894, found 928.0895.

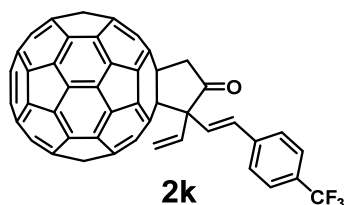

Spectral data of **2k**: the mixture was separated and purified by silica gel column chromatography with  $\text{CS}_2$  as the eluent to give unreacted  $\text{C}_{60}$  and **2k** (26.8 mg, 55%); amorphous brown solid;  $^1\text{H}$  NMR (400 MHz,  $\text{CDCl}_3/\text{CS}_2$ )  $\delta$  7.60–7.55 (m, 4H), 7.29 (d,  $J = 16.4$  Hz, 1H), 7.08 (dd,  $J = 17.2, 10.4$  Hz, 1H), 7.04 (d,  $J = 16.0$  Hz, 1H), 5.83 (d,  $J = 10.4$  Hz, 1H), 5.74 (d,  $J = 17.6$  Hz, 1H), 4.61 (d,  $J = 17.2$  Hz, 1H), 4.47 (d,  $J = 17.2$  Hz, 1H);  $^{13}\text{C}\{^1\text{H}\}$  NMR (150 MHz,  $\text{CDCl}_3/\text{CS}_2$  with  $\text{Cr}(\text{acac})_3$  as relaxation reagent)  $\delta$  208.5, 155.5, 155.3, 152.21, 152.20, 147.72, 147.65, 146.40, 146.38, 146.31, 148.28, 145.9, 145.68, 145.66, 145.54, 145.51, 145.47, 145.46, 145.43, 145.40, 145.1, 144.74, 144.68, 144.64, 144.58, 144.5, 143.29, 143.27, 142.74, 142.68, 142.2, 142.11, 142.09, 141.9, 141.8, 141.7, 141.5, 141.4, 140.4, 139.83, 139.81, 139.7, 137.6, 136.3, 135.9, 135.0, 134.6, 134.0, 131.1, 130.2 ( $J_{\text{C-F}} = 31.7$  Hz), 126.9, 125.73, 125.71, 123.9 ( $J_{\text{C-F}} = 270.4$  Hz), 121.0, 74.6, 65.2, 62.1, 48.8;  $^{19}\text{F}$  NMR (565 MHz,  $\text{CDCl}_3/\text{CS}_2$ )  $\delta$ : -62.3; FT-IR  $\nu/\text{cm}^{-1}$  1745, 1509, 1410, 1319, 1160, 1119, 1065, 524; UV-vis ( $\text{CHCl}_3$ )  $\lambda_{\text{max}}/\text{nm}$  256, 315, 434, 700; MALDI-TOF MS  $m/z$  calcd for  $\text{C}_{74}\text{H}_{11}\text{OF}_3$   $[\text{M}]^-$  972.0767, found 972.0751.

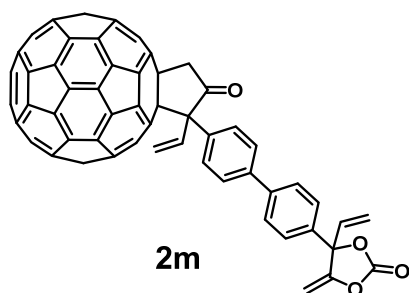

Spectral data of **2m**: the mixture was separated and purified by silica gel column chromatography with CS<sub>2</sub> as the eluent to recover unreacted C<sub>60</sub>, and then the eluent was switched to CS<sub>2</sub>/DCM (v/v = 2:1) to give **2m** (16.4 mg, 30%); amorphous brown solid; <sup>1</sup>H NMR (400 MHz, CDCl<sub>3</sub>/CS<sub>2</sub>) δ 7.79 (dd, *J* = 17.2, 10.4 Hz, 1H), 7.78 (d, *J* = 8.4 Hz, 2H), 7.59 (t, *J* = 8.4 Hz, 4H), 7.48 (d, *J* = 8.4 Hz, 2H), 6.18 (dd, *J* = 17.2 Hz, 10.4 Hz, 1H), 5.94 (d, *J* = 10.8 Hz, 1H), 5.73 (d, *J* = 17.2 Hz, 1H), 5.54 (d, *J* = 3.6 Hz, 1H), 5.50 (d, *J* = 3.2 Hz, 1H), 5.06 (d, *J* = 3.6 Hz, 1H), 4.94 (d, *J* = 17.6 Hz, 1H), 4.39 (d, *J* = 3.6 Hz, 1H), 4.29 (d, *J* = 18.0 Hz, 1H); <sup>13</sup>C{<sup>1</sup>H} NMR (150 MHz, CDCl<sub>3</sub>/CS<sub>2</sub> with Cr(acac)<sub>3</sub> as relaxation reagent) δ 207.1, 155.4, 154.0, 153.3, 152.2, 150.7, 149.3, 146.53, 146.46, 145.3, 145.24, 145.17, 145.15, 144.99, 144.95, 144.8, 144.7, 144.53, 144.49, 144.46, 144.4, 144.32, 144.26, 144.24, 144.22, 144.20, 144.14, 144.1, 143.6, 143.4, 143.37, 143.2, 142.7, 142.11, 142.09, 141.6, 141.5, 141.4, 141.0, 140.94, 140.88, 140.8, 140.67, 140.66, 140.6, 140.33, 140.32, 140.27, 140.0, 139.4, 139.0, 138.6, 138.5, 138.0, 137.84, 137.77, 136.1, 134.8, 134.4, 134.0, 133.7, 132.9, 130.5, 126.3, 125.7, 125.6, 121.1, 117.4, 89.2, 87.7, 76.2, 75.2, 67.2, 60.4, 48.3; FT-IR ν/cm<sup>-1</sup> 1821, 1742, 1677, 1496, 1399, 1260, 1094, 1014, 802, 524; UV-vis (CHCl<sub>3</sub>) λ<sub>max</sub>/nm 256, 314, 434, 700; MALDI-TOF MS *m/z* calcd for C<sub>83</sub>H<sub>18</sub>O<sub>4</sub> [M]<sup>-</sup> 1078.1211, found 1078.1206.

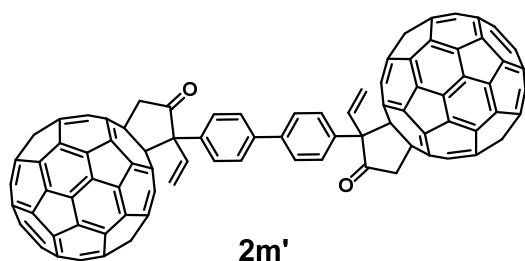

Spectral data of **2m'**: the mixture was separated and purified by silica gel column chromatography with CS<sub>2</sub> as the eluent to recover unreacted C<sub>60</sub>, and then the eluent was switched to CS<sub>2</sub>/DCM (v/v = 4:1) to give **2m'** (7.8 mg, 17%); amorphous brown solid; <sup>1</sup>H NMR (400 MHz, DMSO-*d*<sub>6</sub>/CS<sub>2</sub>) δ 7.73 (dd, *J* = 17.2 Hz, 10.4 Hz, 2H), 7.70 (d, *J* = 8.4 Hz, 4H), 7.55 (d, *J* = 8.4 Hz, 4H), 5.87 (d, *J* = 10.8 Hz, 2H), 5.62 (d, *J* = 17.2 Hz, 2H), 4.94 (dd, *J* = 17.6, 1.6 Hz, 2H), 4.25 (d, *J* = 17.6 Hz, 2H); the <sup>13</sup>C NMR spectrum of **2m'** could not be obtained because of poor solubility of the product; FT-IR ν/cm<sup>-1</sup> 1742, 1497, 1424, 1144, 1024, 1003, 797, 764, 668, 525; UV-vis (CHCl<sub>3</sub>) λ<sub>max</sub>/nm 258, 315, 435, 702; MALDI-TOF MS *m/z* calcd for C<sub>142</sub>H<sub>18</sub>O<sub>2</sub> [M]<sup>-</sup> 1755.1346, found 1755.1324.

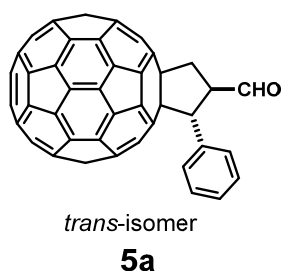

Spectral data of **5a**: the mixture was separated and purified by silica gel column chromatography with CS<sub>2</sub> as the eluent to recover unreacted C<sub>60</sub>, and then the eluent was switched to CS<sub>2</sub>/DCM (v/v = 8:1) to give **5a** (19.2 mg, 44%); amorphous brown solid; <sup>1</sup>H NMR (400 MHz, CDCl<sub>3</sub>/CS<sub>2</sub>) δ 10.12 (d, *J* = 2.8 Hz, 1H), 7.64 (d, *J* = 7.6

Hz, 2H) , 7.38 (t,  $J = 7.6$  Hz, 2H), 7.30 (t,  $J = 7.6$  Hz, 1H), 5.14 (d,  $J = 12.8$  Hz, 1H), 4.78–4.70 (m, 1H), 4.02–3.92 (m, 2H);  $^{13}\text{C}\{^1\text{H}\}$  NMR (150 MHz,  $\text{CDCl}_3/\text{CS}_2$  with  $\text{Cr}(\text{acac})_3$  as relaxation reagent)  $\delta$  199.9, 156.0, 155.6, 154.6, 152.4, 147.2, 146.2, 146.17, 146.15, 146.12, 146.02, 145.97, 145.9, 145.8, 145.7, 145.6, 145.4, 145.32, 145.3, 145.24, 145.21, 145.1, 145.0, 144.6, 144.5, 144.29, 144.28, 143.0, 142.9, 142.6, 142.52, 142.49, 142.4, 142.3, 142.1, 142.04, 142.98, 141.92, 141.85, 141.8, 141.6, 141.53, 141.49, 140.2, 140.1, 139.6, 139.4, 135.9, 135.6, 135.34, 135.26, 135.2, 129.3, 128.9, 128.3, 75.2, 68.9, 62.3, 53.2, 43.7; FT-IR  $\nu/\text{cm}^{-1}$  3307, 2973, 2879, 1718, 1426, 1379, 1087, 1046, 880, 524; UV-vis ( $\text{CHCl}_3$ )  $\lambda_{\text{max}}/\text{nm}$  256, 310, 431, 700; MALDI-TOF MS  $m/z$  calcd for  $\text{C}_{70}\text{H}_{10}\text{O}$   $[\text{M}]^-$  866.0737, found 866.0716.

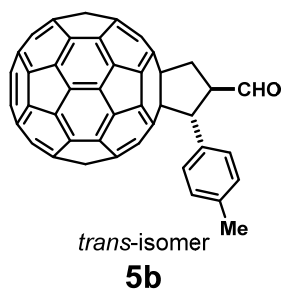

Spectral data of **5b**: the mixture was separated and purified by silica gel column chromatography with  $\text{CS}_2$  as the eluent to recover unreacted  $\text{C}_{60}$ , and then the eluent was switched to  $\text{CS}_2/\text{DCM}$  ( $v/v = 8:1$ ) to give **5b** (13.2 mg, 30%); amorphous brown solid;  $^1\text{H}$  NMR (400 MHz,  $\text{CDCl}_3/\text{CS}_2$ )  $\delta$  10.10 (d,  $J = 2.8$  Hz, 1H), 7.52 (d,  $J = 7.6$  Hz, 2H) , 7.18 (d,  $J = 8.0$  Hz, 2H), 5.10 (d,  $J = 12.8$  Hz, 1H), 4.75–4.66 (m, 1H), 4.01–3.90 (m, 2H), 2.33 (s, 3H);  $^{13}\text{C}\{^1\text{H}\}$  NMR (150 MHz,  $\text{CDCl}_3/\text{CS}_2$  with  $\text{Cr}(\text{acac})_3$  as relaxation reagent)  $\delta$  200.2, 156.2, 155.8, 154.8, 152.7, 147.3, 146.3, 146.28, 146.25, 146.19, 146.18, 146.1, 146.04, 146.01, 145.97, 145.8, 145.7, 145.42, 145.41,

145.35, 145.31, 145.28, 145.2, 145.1, 144.7, 144.5, 144.38, 144.35, 143.1, 143.0, 142.7, 142.59, 142.55, 142.5, 142.3, 142.2, 142.1, 142.0, 141.9, 141.8, 141.7, 141.63, 141.59, 140.3, 140.2, 139.7, 139.5, 138.0, 136.0, 135.4, 135.3, 132.6, 129.7, 129.3, 75.4, 69.0, 62.1, 53.4, 43.7, 21.3; FT-IR  $\nu/\text{cm}^{-1}$  3308, 2972, 2874, 1720, 1509, 1087, 1045, 879, 527; UV-vis ( $\text{CHCl}_3$ )  $\lambda_{\text{max}}/\text{nm}$  258, 314, 431, 700; MALDI-TOF MS  $m/z$  calcd for  $\text{C}_{71}\text{H}_{12}\text{O}$   $[\text{M}]^-$  880.0894, found 880.0872.

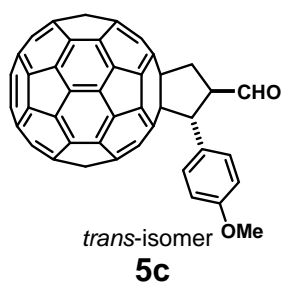

Spectral data of **5c**: the mixture was separated and purified by silica gel column chromatography with  $\text{CS}_2$  as the eluent to recover unreacted  $\text{C}_{60}$ , and then the eluent was switched to  $\text{CS}_2/\text{DCM}$  ( $v/v = 4:1$ ) to give **5c** (6.9 mg, 15%); amorphous brown solid;  $^1\text{H}$  NMR (400 MHz,  $\text{CDCl}_3/\text{CS}_2$ )  $\delta$  10.10 (d,  $J = 2.8$  Hz, 1H), 7.56 (d,  $J = 8.4$  Hz, 2H), 6.89 (d,  $J = 8.8$  Hz, 2H), 5.10 (d,  $J = 12.8$  Hz, 1H), 4.72–4.63 (m, 1H), 4.01–3.90 (m, 2H), 3.77 (s, 3H);  $^{13}\text{C}\{^1\text{H}\}$  NMR (150 MHz,  $\text{CDCl}_3/\text{CS}_2$  with  $\text{Cr}(\text{acac})_3$  as relaxation reagent)  $\delta$  200.1, 159.3, 156.2, 155.7, 154.8, 152.7, 147.24, 147.22, 146.23, 146.22, 146.21, 146.15, 146.13, 146.06, 146.0, 145.93, 145.92, 145.7, 145.6, 145.38, 145.36, 145.3, 145.28, 145.27, 145.25, 145.13, 145.07, 144.6, 144.5, 144.4, 144.3, 143.1, 142.98, 142.96, 142.63, 142.56, 142.51, 142.46, 142.3, 142.1, 142.02, 141.96, 141.9, 141.8, 141.7, 141.58, 141.55, 140.2, 140.1, 139.7, 139.5, 135.9, 135.4, 135.24, 135.23, 130.4, 127.5, 114.3, 75.5, 68.9, 61.7, 55.0, 53.5, 43.6; FT-IR  $\nu/\text{cm}^{-1}$

1724, 1512, 1427, 1249, 1178, 1032, 828, 668, 526; UV-vis (CHCl<sub>3</sub>)  $\lambda_{\text{max}}$ /nm 258, 319, 431, 699; MALDI-TOF MS  $m/z$  calcd for C<sub>71</sub>H<sub>12</sub>O<sub>2</sub> [M]<sup>-</sup> 896.0843, found 896.0821.

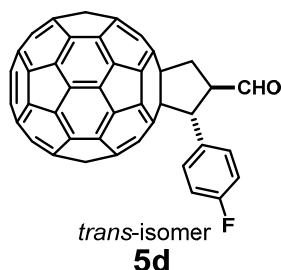

Spectral data of **5d**: the mixture was separated and purified by silica gel column chromatography with CS<sub>2</sub> as the eluent to recover unreacted C<sub>60</sub>, and then the eluent was switched to CS<sub>2</sub>/DCM (v/v = 8:1) to give **5d** (14.9 mg, 33%); amorphous brown solid; <sup>1</sup>H NMR (400 MHz, CDCl<sub>3</sub>/CS<sub>2</sub>)  $\delta$  10.13 (d,  $J$  = 3.2 Hz, 1H), 7.64 (d,  $J$  = 8.4, 5.2 Hz, 1H), 7.08 (t,  $J$  = 8.4 Hz, 2H), 5.15 (d,  $J$  = 12.8 Hz, 1H), 4.73–4.65 (m, 1H), 4.02–3.95 (m, 2H); <sup>13</sup>C{<sup>1</sup>H} NMR (150 MHz, CDCl<sub>3</sub>/CS<sub>2</sub> with Cr(acac)<sub>3</sub> as relaxation reagent)  $\delta$  199.8, 162.4 ( $J_{C-F}$  = 247.0 Hz), 155.9, 155.5, 154.4, 152.1, 147.3, 146.23, 146.15, 146.1, 146.0, 145.97, 145.95, 145.9, 145.6, 145.5, 145.39, 145.35, 145.31, 145.3, 145.28, 145.25, 145.13, 145.1, 144.6, 144.5, 144.3, 143.1, 143.0, 142.7, 142.6, 142.53, 142.47, 142.3, 142.1, 142.04, 142.0, 141.95, 141.88, 141.86, 141.8, 141.7, 141.6, 141.5, 140.3, 140.2, 139.7, 139.5, 136.0, 135.4, 135.3, 135.2, 131.5, 130.9, 116.0, 115.8, 75.1, 68.9, 61.4, 53.5, 43.7; <sup>19</sup>F NMR (377 MHz, CDCl<sub>3</sub>/CS<sub>2</sub>)  $\delta$ : -111.1; FT-IR  $\nu/\text{cm}^{-1}$  1718, 1508, 1425, 1230, 1095, 840, 525; UV-vis (CHCl<sub>3</sub>)  $\lambda_{\text{max}}$ /nm 256, 312, 431, 697; MALDI-TOF MS  $m/z$  calcd for C<sub>70</sub>H<sub>9</sub>FO [M]<sup>-</sup> 884.0643, found 884.0621.

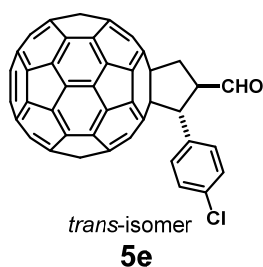

Spectral data of **5e**: the mixture was separated and purified by silica gel column chromatography with CS<sub>2</sub> as the eluent to recover unreacted C<sub>60</sub>, and then the eluent was switched to CS<sub>2</sub>/DCM (v/v = 8:1) to give **5e** (23.6 mg, 52%); amorphous brown solid; <sup>1</sup>H NMR (400 MHz, CDCl<sub>3</sub>/CS<sub>2</sub>) δ 10.12 (d, *J* = 2.8 Hz, 1H), 7.60 (d, *J* = 8.4 Hz, 2H), 7.36 (d, *J* = 8.4 Hz, 2H), 5.13 (d, *J* = 12.4 Hz, 1H), 4.74–4.65 (m, 1H), 3.97 (d, *J* = 8.8 Hz, 2H); <sup>13</sup>C{<sup>1</sup>H} NMR (150 MHz, CDCl<sub>3</sub>/CS<sub>2</sub> with Cr(acac)<sub>3</sub> as relaxation reagent) δ 199.5, 155.8, 155.4, 154.2, 151.9, 147.3, 146.25, 146.24, 146.16, 146.1, 146.0, 145.96, 145.94, 145.92, 145.60, 145.58, 145.5, 145.4, 145.38, 145.32, 145.29, 145.25, 145.14, 145.11, 144.6, 144.5, 144.3, 143.1, 143.0, 142.7, 142.59, 142.55, 142.5, 142.3, 142.1, 142.03, 142.00, 141.96, 141.89, 141.86, 141.8, 141.7, 141.6, 141.5, 140.3, 140.2, 139.7, 139.6, 136.1, 135.4, 135.3, 135.2, 134.4, 134.3, 130.6, 129.1, 75.0, 68.9, 61.5, 53.3, 43.7; FT-IR v/cm<sup>-1</sup> 1721, 1508, 1091, 1013, 827, 668, 524; UV-vis (CHCl<sub>3</sub>) λ<sub>max</sub>/nm 256, 318, 431, 697; MALDI-TOF MS *m/z* calcd for C<sub>70</sub>H<sub>9</sub>ClO [M]<sup>-</sup> 900.0347, found 900.0326.

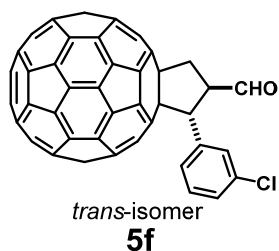

Spectral data of **5f**: the mixture was separated and purified by silica gel column chromatography with CS<sub>2</sub> as the eluent to recover unreacted C<sub>60</sub>, and then the eluent was switched to CS<sub>2</sub>/DCM (v/v = 8:1) to give **5f** (26.1 mg, 58%); amorphous brown solid; <sup>1</sup>H NMR (400 MHz, CDCl<sub>3</sub>/CS<sub>2</sub>) δ 10.14 (s, 1H), 7.63 (s, 1H), 7.56 (d, *J* = 7.2 Hz, 1H), 7.34 (t, *J* = 7.6 Hz, 1H), 7.28 (d, *J* = 8.0 Hz, 1H), 5.11 (d, *J* = 12.4 Hz, 1H), 4.74–4.67 (m, 1H), 3.98–3.92 (m, 1H); <sup>13</sup>C{<sup>1</sup>H} NMR (150 MHz, CDCl<sub>3</sub>/CS<sub>2</sub> with Cr(acac)<sub>3</sub> as relaxation reagent) δ 199.3, 155.7, 155.3, 154.1, 151.7, 147.2, 146.20, 146.18, 146.11, 146.03, 145.98, 145.91, 145.90, 145.8, 145.53, 145.50, 145.42, 145.38, 145.35, 145.27, 145.24, 145.14, 145.09, 145.06, 144.5, 144.46, 144.3, 143.0, 142.9, 142.6, 142.53, 142.49, 142.4, 142.2, 142.1, 142.0, 141.91, 141.84, 141.82, 141.75, 141.7, 141.6, 141.5, 140.3, 140.1, 139.7, 139.5, 137.9, 136.0, 135.4, 135.3, 135.1, 134.9, 130.1, 128.5, 74.8, 68.9, 61.5, 53.2, 43.7; FT-IR ν/cm<sup>-1</sup> 2963, 1722, 1507, 1428, 1259, 1082, 1015, 791, 524; UV-vis (CHCl<sub>3</sub>) λ<sub>max</sub>/nm 256, 312, 431, 697; MALDI-TOF MS *m/z* calcd for C<sub>70</sub>H<sub>9</sub>ClO [M]<sup>+</sup> 900.0347, found 900.0339.

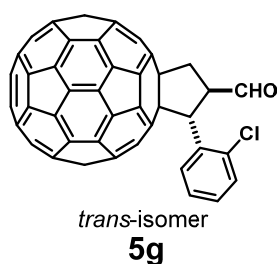

Spectral data of **5g**: the mixture was separated and purified by silica gel column chromatography with CS<sub>2</sub> as the eluent to recover unreacted C<sub>60</sub>, and then the eluent was switched to CS<sub>2</sub>/DCM (v/v = 8:1) to give **5g** (14.4 mg, 32%); amorphous brown solid; <sup>1</sup>H NMR (400 MHz, CDCl<sub>3</sub>/CS<sub>2</sub>) δ 10.03 (d, *J* = 3.2 Hz, 1H), 7.79 (d, *J* = 7.6

Hz, 1H) , 7.42 (d,  $J = 8.0$  Hz, 1H), 7.34 (t,  $J = 7.6$  Hz, 1H), 7.24 (t,  $J = 8.0$  Hz, 1H), 5.87 (d,  $J = 12.8$  Hz, 1H), 4.69–4.61 (m, 1H), 4.06–3.93 (m, 2H);  $^{13}\text{C}\{^1\text{H}\}$  NMR (150 MHz,  $\text{CDCl}_3/\text{CS}_2$  with  $\text{Cr}(\text{acac})_3$  as relaxation reagent)  $\delta$  198.8, 156.1, 155.0, 154.9, 152.1, 147.12, 146.07, 146.04, 145.97, 145.90, 145.87, 145.8, 145.6, 145.51, 145.46, 145.4, 145.3, 145.24, 145.18, 145.14, 145.09, 145.0, 144.9, 144.5, 144.3, 144.1, 142.9, 142.5, 142.4, 142.3, 142.2, 142.1, 141.9, 141.81, 141.77, 141.7, 141.6, 141.5, 141.2, 140.2, 140.0, 139.6, 139.4, 135.8, 135.6, 135.5, 135.1, 134.5, 133.7, 130.3, 130.1, 129.2, 127.2, 74.5, 69.0, 56.6, 53.9, 43.3; FT-IR  $\nu/\text{cm}^{-1}$  2929, 1718, 1513, 1428, 1262, 1035, 802, 747, 526; UV-vis ( $\text{CHCl}_3$ )  $\lambda_{\text{max}}/\text{nm}$  256, 311, 431, 698; MALDI-TOF MS  $m/z$  calcd for  $\text{C}_{70}\text{H}_9\text{ClO}$   $[\text{M}]^-$  900.0347, found 900.0354.

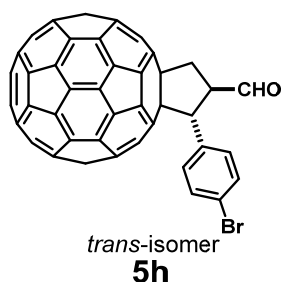

Spectral data of **5h**: the mixture was separated and purified by silica gel column chromatography with  $\text{CS}_2$  as the eluent to recover unreacted  $\text{C}_{60}$ , and then the eluent was switched to  $\text{CS}_2/\text{DCM}$  (v/v = 8:1) to give **5h** (22.5 mg, 47%); amorphous brown solid;  $^1\text{H}$  NMR (400 MHz,  $\text{CDCl}_3/\text{CS}_2$ )  $\delta$  10.11 (d,  $J = 2.8$  Hz, 1H), 7.53 (d,  $J = 8.8$  Hz, 2H), 7.50 (d,  $J = 9.2$  Hz, 2H), 5.10 (d,  $J = 12.4$  Hz, 1H), 4.72–4.63 (m, 1H), 3.969 (d,  $J = 8.8$  Hz, 2H);  $^{13}\text{C}\{^1\text{H}\}$  NMR (150 MHz,  $\text{CDCl}_3/\text{CS}_2$  with  $\text{Cr}(\text{acac})_3$  as relaxation reagent)  $\delta$  199.4, 155.8, 155.4, 154.2, 151.9, 147.2, 146.24, 146.22, 146.14, 146.10, 146.02, 145.95, 145.93, 145.90, 145.58, 145.56, 145.5, 145.39, 145.37,

145.33, 145.31, 145.29, 145.28, 145.2, 145.13, 145.10, 144.53, 144.49, 144.3, 143.1, 143.0, 142.7, 142.6, 142.54, 142.47, 142.3, 142.1, 142.02, 141.99, 141.95, 141.88, 141.85, 141.8, 141.7, 141.6, 141.5, 140.3, 140.2, 139.7, 139.6, 136.1, 135.4, 135.3, 135.2, 134.8, 132.1, 130.9, 122.7, 74.9, 68.9, 61.5, 53.3, 43.7; FT-IR  $\nu/\text{cm}^{-1}$  1722, 1508, 1010, 668, 524; UV-vis ( $\text{CHCl}_3$ )  $\lambda_{\text{max}}/\text{nm}$  256, 313, 431, 697; MALDI-TOF MS  $m/z$  calcd for  $\text{C}_{70}\text{H}_9\text{BrO}$   $[\text{M}]^-$  943.9842, found 943.9821.

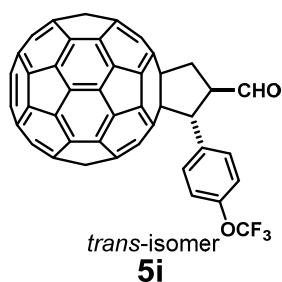

Spectral data of **5i**: the mixture was separated and purified by silica gel column chromatography with  $\text{CS}_2$  as the eluent to recover unreacted  $\text{C}_{60}$ , and then the eluent was switched to  $\text{CS}_2/\text{DCM}$  ( $v/v = 8:1$ ) to give **5i** (19.4 mg, 41%); amorphous brown solid;  $^1\text{H}$  NMR (400 MHz,  $\text{CDCl}_3/\text{CS}_2$ )  $\delta$  10.13 (d,  $J = 2.8$  Hz, 1H), 7.70 (d,  $J = 8.4$  Hz, 2H), 7.24 (d,  $J = 8.0$  Hz, 2H), 5.17 (d,  $J = 12.4$  Hz, 1H), 4.75–4.67 (m, 1H), 3.98 (d,  $J = 8.4$  Hz, 2H);  $^{13}\text{C}\{^1\text{H}\}$  NMR (150 MHz,  $\text{CDCl}_3/\text{CS}_2$  with  $\text{Cr}(\text{acac})_3$  as relaxation reagent)  $\delta$  199.5, 155.8, 155.4, 154.1, 151.8, 149.0, 147.3, 146.24, 146.17, 146.1, 146.04, 145.97, 145.95, 145.9, 145.6, 145.52, 145.48, 145.40, 145.39, 145.35, 145.33, 145.31, 145.3, 145.26, 145.14, 145.12, 144.54, 144.51, 144.32, 144.31, 144.29, 143.1, 143.0, 142.7, 142.59, 142.55, 142.5, 142.3, 142.11, 142.03, 142.00, 141.96, 141.87, 141.85, 141.8, 141.7, 141.6, 141.5, 140.3, 140.2, 139.7, 139.5, 136.1, 135.4, 135.3, 135.2, 134.4, 130.7, 121.0, 120.7 ( $J_{\text{C-F}} = 257.2$  Hz), 74.9, 68.9, 61.3,

53.4, 43.7;  $^{19}\text{F}$  NMR (565 MHz,  $\text{CDCl}_3/\text{CS}_2$ )  $\delta$ : -57.5; FT-IR  $\nu/\text{cm}^{-1}$  1719, 1508, 1248, 1205, 1160, 524; UV-vis ( $\text{CHCl}_3$ )  $\lambda_{\text{max}}/\text{nm}$  255, 318, 431, 697; MALDI-TOF MS  $m/z$  calcd for  $\text{C}_{71}\text{H}_9\text{F}_3\text{O}_2$   $[\text{M}]^-$  950.0560, found 950.0539.

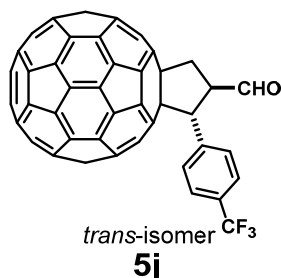

Spectral data of **5j**: the mixture was separated and purified by silica gel column chromatography with  $\text{CS}_2$  as the eluent to recover unreacted  $\text{C}_{60}$ , and then the eluent was switched to  $\text{CS}_2/\text{DCM}$  ( $v/v = 8:1$ ) to give **5j** (30.3 mg, 64%); amorphous brown solid;  $^1\text{H}$  NMR (400 MHz,  $\text{CDCl}_3/\text{CS}_2$ )  $\delta$  10.14 (d,  $J = 2.8$  Hz, 1H), 7.80 (d,  $J = 8.0$  Hz, 2H), 7.66 (d,  $J = 8.0$  Hz, 2H), 5.22 (d,  $J = 12.8$  Hz, 1H), 4.81–4.73 (m, 1H), 4.05–3.95 (m, 2H);  $^{13}\text{C}\{^1\text{H}\}$  NMR (150 MHz,  $\text{CDCl}_3/\text{CS}_2$  with  $\text{Cr}(\text{acac})_3$  as relaxation reagent)  $\delta$  199.2, 155.6, 155.2, 153.9, 151.5, 147.2, 146.21, 146.20, 146.13, 146.05, 146.0, 145.93, 145.91, 145.7, 145.48, 145.46, 145.37, 145.36, 145.32, 145.29, 145.26, 145.2, 145.1, 144.5, 144.28, 144.25, 144.2, 143.03, 142.95, 142.63, 142.55, 142.5, 142.4, 142.2, 142.1, 142.0, 141.94, 141.91, 141.82, 141.79, 141.76, 141.7, 141.5, 141.4, 140.3, 140.2, 139.9, 139.7, 139.5, 136.1, 135.4, 135.2, 135.1, 130.4 ( $J_{\text{C-F}} = 32.4$  Hz), 129.7, 125.7, 123.6 ( $J_{\text{C-F}} = 247.0$  Hz), 74.7, 68.9, 61.5, 53.3, 43.7;  $^{19}\text{F}$  NMR (377 MHz,  $\text{CDCl}_3/\text{CS}_2$ )  $\delta$ : -62.4; FT-IR  $\nu/\text{cm}^{-1}$  1724, 1512, 1422, 1323, 1164, 1120, 1068, 1017, 841, 527; UV-vis ( $\text{CHCl}_3$ )  $\lambda_{\text{max}}/\text{nm}$  258, 313, 431, 697; MALDI-TOF MS  $m/z$  calcd for  $\text{C}_{71}\text{H}_9\text{F}_3\text{O}$   $[\text{M}]^-$  934.0611, found 934.0619.

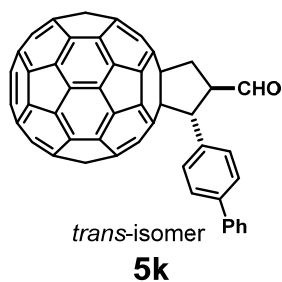

Spectral data of **5k**: the mixture was separated and purified by silica gel column chromatography with CS<sub>2</sub> as the eluent to recover unreacted C<sub>60</sub>, and then the eluent was switched to CS<sub>2</sub>/DCM (v/v = 8:1) to give **5k** (12.3 mg, 26%); amorphous brown solid; <sup>1</sup>H NMR (400 MHz, CDCl<sub>3</sub>/CS<sub>2</sub>) δ 10.16 (d, *J* = 3.2 Hz, 1H), 7.73 (d, *J* = 8.0 Hz, 2H), 7.62 (d, *J* = 8.0 Hz, 2H), 7.55 (d, *J* = 7.2 Hz, 2H), 7.40 (t, *J* = 7.2 Hz, 2H), 7.30 (t, *J* = 7.2 Hz, 1H), 5.20 (d, *J* = 12.8 Hz, 1H), 4.82–4.74 (m, 1H), 4.05–3.95 (m, 2H); <sup>13</sup>C{<sup>1</sup>H} NMR (150 MHz, CDCl<sub>3</sub>/CS<sub>2</sub> with Cr(acac)<sub>3</sub> as relaxation reagent) δ 200.0, 156.1, 155.7, 154.7, 152.5, 147.3, 146.31, 146.27, 146.24, 146.22, 146.21, 146.14, 146.08, 146.00, 145.99, 145.9, 145.8, 145.7, 145.5, 145.43, 145.36, 145.3, 145.2, 145.1, 144.7, 144.6, 144.41, 144.39, 144.38, 143.1, 143.0, 142.7, 142.62, 142.59, 142.5, 142.4, 142.18, 142.15, 142.1, 142.02, 141.96, 141.9, 141.8, 141.6, 141.0, 140.3, 140.2, 140.1, 139.8, 139.6, 136.1, 135.5, 135.4, 135.3, 134.7, 129.9, 128.8, 127.5, 127.0, 75.4, 69.1, 62.1, 53.5, 43.8; FT-IR ν/cm<sup>-1</sup> 3310, 2973, 2880, 1725, 1510, 1087, 1046, 880, 525; UV-vis (CHCl<sub>3</sub>) λ<sub>max</sub>/nm 256, 313, 431, 700; MALDI-TOF MS *m/z* calcd for C<sub>76</sub>H<sub>14</sub>O [M]<sup>-</sup> 942.1050, found 942.1029.

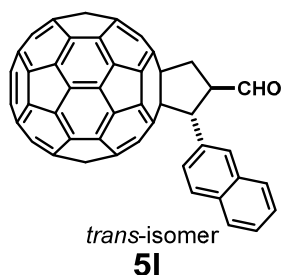

Spectral data of **5I**: the mixture was separated and purified by silica gel column chromatography with CS<sub>2</sub> as the eluent to recover unreacted C<sub>60</sub>, and then the eluent was switched to CS<sub>2</sub>/DCM (v/v = 8:1) to give **5I** (10.2 mg, 21%); amorphous brown solid; <sup>1</sup>H NMR (400 MHz, CDCl<sub>3</sub>/CS<sub>2</sub>) δ 10.15 (d, *J* = 2.8 Hz, 1H), 8.08 (s, 1H), 7.87–7.77 (m, 4H), 7.48–7.43 (m, 2H), 5.31 (d, *J* = 12.4 Hz, 1H), 4.91–4.83 (m, 1H), 4.08–3.97 (m, 2H); <sup>13</sup>C{<sup>1</sup>H} NMR (150 MHz, CDCl<sub>3</sub>/CS<sub>2</sub> with Cr(acac)<sub>3</sub> as relaxation reagent) δ 199.9, 156.1, 155.8, 154.7, 152.4, 147.3, 146.3, 146.24, 146.22, 146.20, 146.11, 146.06, 146.0, 145.8, 145.6, 145.5, 145.43, 145.35, 145.31, 145.28, 145.2, 145.1, 144.7, 144.6, 144.39, 144.36, 143.1, 143.0, 142.7, 142.6, 142.5, 142.4, 142.2, 142.1, 142.04, 142.02, 141.96, 141.92, 141.86, 141.7, 141.61, 141.59, 140.3, 140.2, 139.7, 139.6, 136.1, 135.5, 135.4, 135.3, 133.2, 133.0, 128.8, 128.1, 127.8, 126.6, 126.5, 75.4, 69.1, 62.6, 53.5, 43.8; FT-IR ν/cm<sup>-1</sup> 1723, 1510, 746, 574, 526; UV-vis (CHCl<sub>3</sub>) λ<sub>max</sub>/nm 257, 313, 431, 698; MALDI-TOF MS *m/z* calcd for C<sub>74</sub>H<sub>12</sub>O [M]<sup>-</sup> 916.0894, found 916.0878.

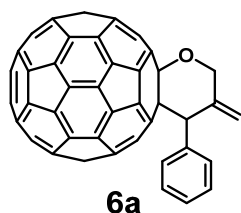

Spectral data of **6a**<sup>3</sup>: <sup>1</sup>H NMR (400 MHz, CDCl<sub>3</sub>/CS<sub>2</sub>) δ 7.63 (d, *J* = 7.6 Hz, 2H),

7.34 (t,  $J = 7.2$  Hz, 2H), 7.27 (t,  $J = 7.2$  Hz, 1H), 5.80 (s, 1H), 5.75 (d,  $J = 15.6$  Hz, 1H), 5.54–5.49 (m, 2H), 5.36 (s, 1H).

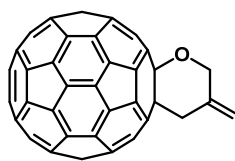

**6m**

Spectral data of **6m**<sup>3</sup>: the mixture was separated and purified by silica gel column chromatography with CS<sub>2</sub> as the eluent to give C<sub>60</sub> and **6m** (12.7 mg, 32%); amorphous brown solid; <sup>1</sup>H NMR (400 MHz, CDCl<sub>3</sub>/CS<sub>2</sub>)  $\delta$  5.50 (s, 2H), 5.45 (s, 2H), 4.24 (s, 2H).

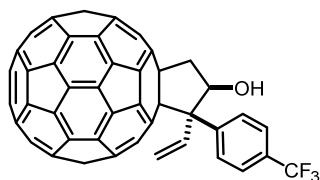

**cis-7g**

Spectral data of **cis-7g**: the mixture was separated and purified by silica gel column chromatography with CS<sub>2</sub>/DCM (v/v = 10:1) as the eluent to give **cis-7g** (10.2 mg, 27%); amorphous brown solid; <sup>1</sup>H NMR (400 MHz, CDCl<sub>3</sub>/CS<sub>2</sub>)  $\delta$  8.38 (d,  $J = 8.0$  Hz, 2H), 7.65 (d,  $J = 8.4$  Hz, 2H), 7.50–7.43 (m, 1H), 5.62 (d,  $J = 10.8$  Hz, 2H), 5.11 (d,  $J = 17.6$  Hz, 1H), 4.20 (dd,  $J = 14.0, 3.2$  Hz, 1H), 3.85 (dd,  $J = 14.0, 2.4$  Hz, 1H), 2.71 (br, 1H); the <sup>13</sup>C NMR spectrum of **cis-7g** could not be obtained because of poor solubility of the product; FT-IR  $\nu/\text{cm}^{-1}$  3284, 2923, 1571, 1456, 1324, 1164, 1120, 1072, 1016, 927, 835, 526; UV-vis (CHCl<sub>3</sub>)  $\lambda_{\text{max}}/\text{nm}$  256, 312, 431, 701; MALDI-TOF MS  $m/z$  calcd for C<sub>72</sub>H<sub>11</sub>F<sub>3</sub>O [M]<sup>+</sup> 948.0767, found 948.0746.

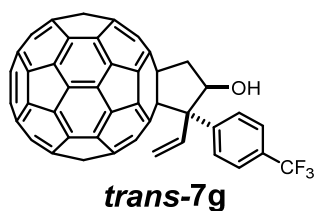

Spectral data of ***trans-7g***: the mixture was separated and purified by silica gel column chromatography with CS<sub>2</sub>/DCM (v/v = 4:1) as the eluent to give ***trans-7g*** (25.1 mg, 66%); amorphous brown solid; <sup>1</sup>H NMR (400 MHz, CDCl<sub>3</sub>/CS<sub>2</sub>) δ 8.00 (d, *J* = 8.0 Hz, 2H), 7.65 (d, *J* = 8.0 Hz, 2H), 7.62 (dd, *J* = 17.6, 10.8 Hz, 1 H), 6.24 (td, *J* = 12.0, 6.4 Hz, 1 H), 5.99 (d, *J* = 11.2 Hz, 1H), 5.25 (d, *J* = 17.2 Hz, 1H), 3.96 (dd, *J* = 12.4, 6.4 Hz, 1 H), 3.73 (t, *J* = 12.4 Hz, 1H), 2.39 (d, *J* = 11.6 Hz, 1H); <sup>13</sup>C{<sup>1</sup>H} NMR (150 MHz, CDCl<sub>3</sub>/CS<sub>2</sub> with Cr(acac)<sub>3</sub> as relaxation reagent) δ 157.7, 156.0, 152.8, 152.5, 147.6, 147.5, 146.8, 146.49, 146.45, 146.4, 146.3, 146.2, 146.17, 145.8, 145.7, 145.61, 145.55, 145.52, 145.50, 145.48, 145.42, 145.41, 145.2, 144.9, 144.6, 144.4, 144.3, 143.9, 143.33, 143.28, 142.90, 142.86, 142.8, 142.7, 142.34, 142.27, 142.23, 142.20, 142.16, 142.0, 141.97, 141.89, 141.62, 141.57, 141.5, 140.7, 140.5, 139.7, 139.5, 139.1, 137.6, 135.9, 135.7, 134.5, 130.7, 129.9 (*J*<sub>C-F</sub> = 32.4 Hz), 125.33, 125.31, 124.0 (*J*<sub>C-F</sub> = 271.0 Hz), 123.3, 76.4, 71.2, 65.1, 64.9, 46.4; FT-IR ν/cm<sup>-1</sup> 3373, 2854, 1616, 1413, 1321, 1164, 1112, 1068, 1016, 936, 808, 524; UV-vis (CHCl<sub>3</sub>) λ<sub>max</sub>/nm 257, 313, 433, 699; MALDI-TOF MS *m/z* calcd for C<sub>72</sub>H<sub>11</sub>F<sub>3</sub>O [M]<sup>-</sup> 948.0767, found 948.0746.

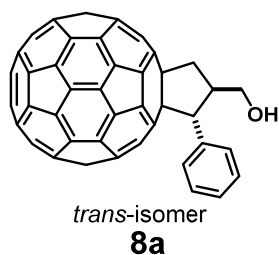

Spectral data of **8a**: the mixture was separated and purified by silica gel column chromatography with CS<sub>2</sub>/DCM (v/v = 4:1) to give the quantitative product **8a**; amorphous brown solid; <sup>1</sup>H NMR (400 MHz, CDCl<sub>3</sub>/CS<sub>2</sub>) δ 7.61 (s, 2H), 7.38 (t, *J* = 7.2 Hz, 2H), 7.28 (t, *J* = 7.2 Hz, 1H), 4.80 (d, *J* = 12.0 Hz, 1H), 4.27 (d, *J* = 10.0 Hz, 1H), 4.09 (d, *J* = 9.6 Hz, 1H), 4.03–3.92 (m, 2H), 3.78 (t, *J* = 12.0 Hz, 1H), 1.58 (s, 1H); <sup>13</sup>C{<sup>1</sup>H} NMR (150 MHz, CDCl<sub>3</sub>/CS<sub>2</sub> with Cr(acac)<sub>3</sub> as relaxation reagent) δ 157.4, 156.9, 155.8, 153.7, 147.2, 146.4, 146.2, 146.18, 146.15, 146.1, 146.04, 146.00, 145.93, 145.91, 145.7, 145.5, 145.29, 145.27, 145.24, 145.17, 145.11, 145.05, 144.6, 144.4, 143.1, 143.0, 142.6, 142.51, 142.48, 142.42, 142.39, 142.2, 142.1, 142.02, 142.00, 141.95, 141.93, 141.89, 141.8, 141.7, 141.6, 141.5, 140.2, 140.1, 139.6, 139.3, 137.2, 136.1, 135.4, 135.1, 135.0, 128.8, 127.8, 76.0, 69.2, 62.9, 62.4, 46.0, 43.7; FT-IR ν/cm<sup>-1</sup> 1704, 1428, 1357, 1218, 1185, 1085, 1041, 698, 526; UV-vis (CHCl<sub>3</sub>) λ<sub>max</sub>/nm 256, 326, 432, 702; MALDI-TOF MS *m/z* calcd for C<sub>70</sub>H<sub>12</sub>O [M]<sup>+</sup> 868.0894, found 868.0872.

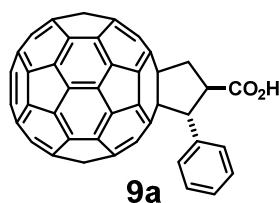

Spectral data of **9a**: the mixture was separated and purified by silica gel column chromatography with CS<sub>2</sub>/DCM/EA (v/v/v = 4:1:1) to give **9a** (30.0 mg, 85%); amorphous brown solid; <sup>1</sup>H NMR (400 MHz, DMSO-*d*<sub>6</sub>/CS<sub>2</sub>) δ 12.9 (br, 1 H), 7.63 (d, *J* = 7.2 Hz, 2H), 7.34 (t, *J* = 7.2 Hz, 2H), 7.24 (t, *J* = 7.2 Hz, 1H), 5.17 (d, *J* = 12.4 Hz, 1H), 4.65–4.57 (m, 1H), 4.07–4.03 (m, 1 H), 3.95 (t, *J* = 12.4 Hz, 1H); <sup>13</sup>C{<sup>1</sup>H} NMR (150 MHz, DMSO-*d*<sub>6</sub>/CS<sub>2</sub> with Cr(acac)<sub>3</sub> as relaxation reagent) δ 172.6, 156.3, 156, 155.1, 146.8, 146.1, 145.81, 145.76, 145.75, 145.72, 145.63, 145.59, 145.5, 145.4, 145.08, 145.97, 144.89, 144.85, 144.81, 144.76, 144.71, 144.65, 144.58, 144.17, 144.0, 143.96, 142.65, 142.59, 142.2, 142.14, 142.09, 142.03, 141.8, 141.7, 141.65, 141.6, 141.58, 141.53, 141.4, 141.27, 141.25, 141.1, 139.8, 139.7, 139.2, 139.0, 136.42, 135.7, 135.2, 135.0, 134.97, 128.3, 127.5, 74.8, 69.1, 63.5, 46.5, 46.1; FT-IR  $\nu/\text{cm}^{-1}$  3456, 1711, 1427, 1262, 1183, 1022, 697, 527; UV-vis (CHCl<sub>3</sub>)  $\lambda_{\text{max}}/\text{nm}$  256, 309, 430, 697; MALDI-TOF MS *m/z* calcd for C<sub>70</sub>H<sub>10</sub>O<sub>2</sub> [M]<sup>+</sup> 882.0686, found 882.0672.

## References:

- (3) Liu, Q.; Liu, T.-X.; Ru, Y.; Zhu, X.; Zhang, G. Palladium-catalyzed decarboxylative heterocyclizations of [60]fullerene: preparation of novel vinyl-substituted [60]fullerene-fused tetrahydrofurans/pyrans/quinolines. *Chem. Commun.* **2019**, 55, 14498.

## 9. $^1\text{H}$ , $^{13}\text{C}$ and $^{19}\text{F}$ NMR Spectra of All Compounds

### $^1\text{H}$ NMR (600 MHz, $\text{CDCl}_3/\text{CS}_2$ ) of compound 2a

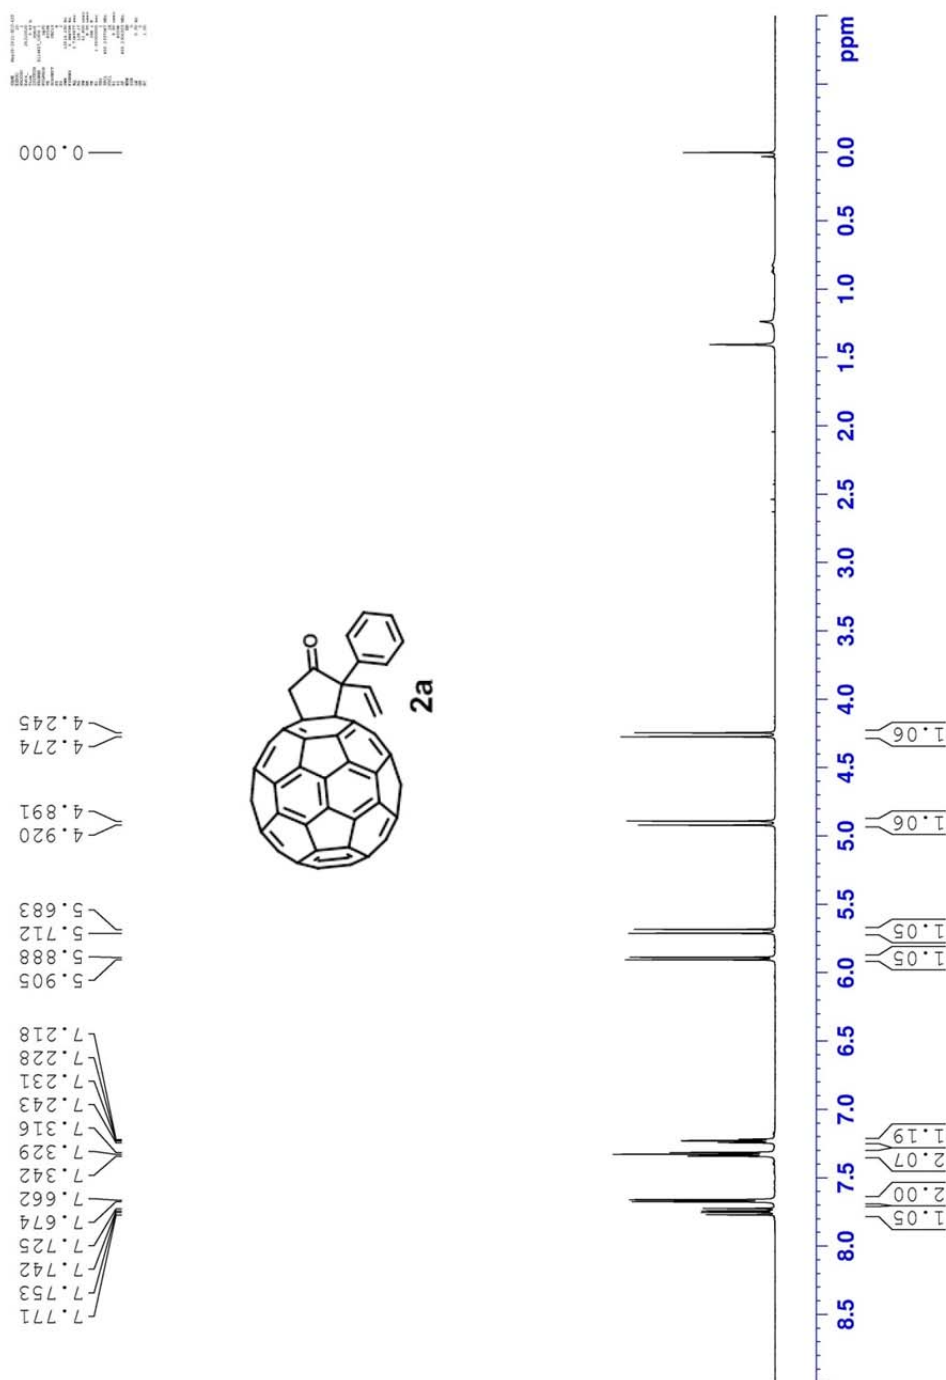

192.772  
192.471  
155.250  
151.912  
147.378  
146.637  
146.305  
146.290  
146.262  
146.073  
146.006  
145.970  
145.669  
145.606  
145.576  
145.359  
145.278  
145.241  
144.760  
144.585  
144.490  
144.430  
143.878  
143.223  
142.696  
142.535  
142.126  
142.101  
142.018  
141.992  
141.976  
141.820  
141.792  
141.741  
141.471  
141.122  
139.145  
139.173  
137.148  
135.573  
134.691  
134.116  
131.016  
128.144  
127.698  
122.041  
77.372  
76.949  
68.496  
61.497  
49.416

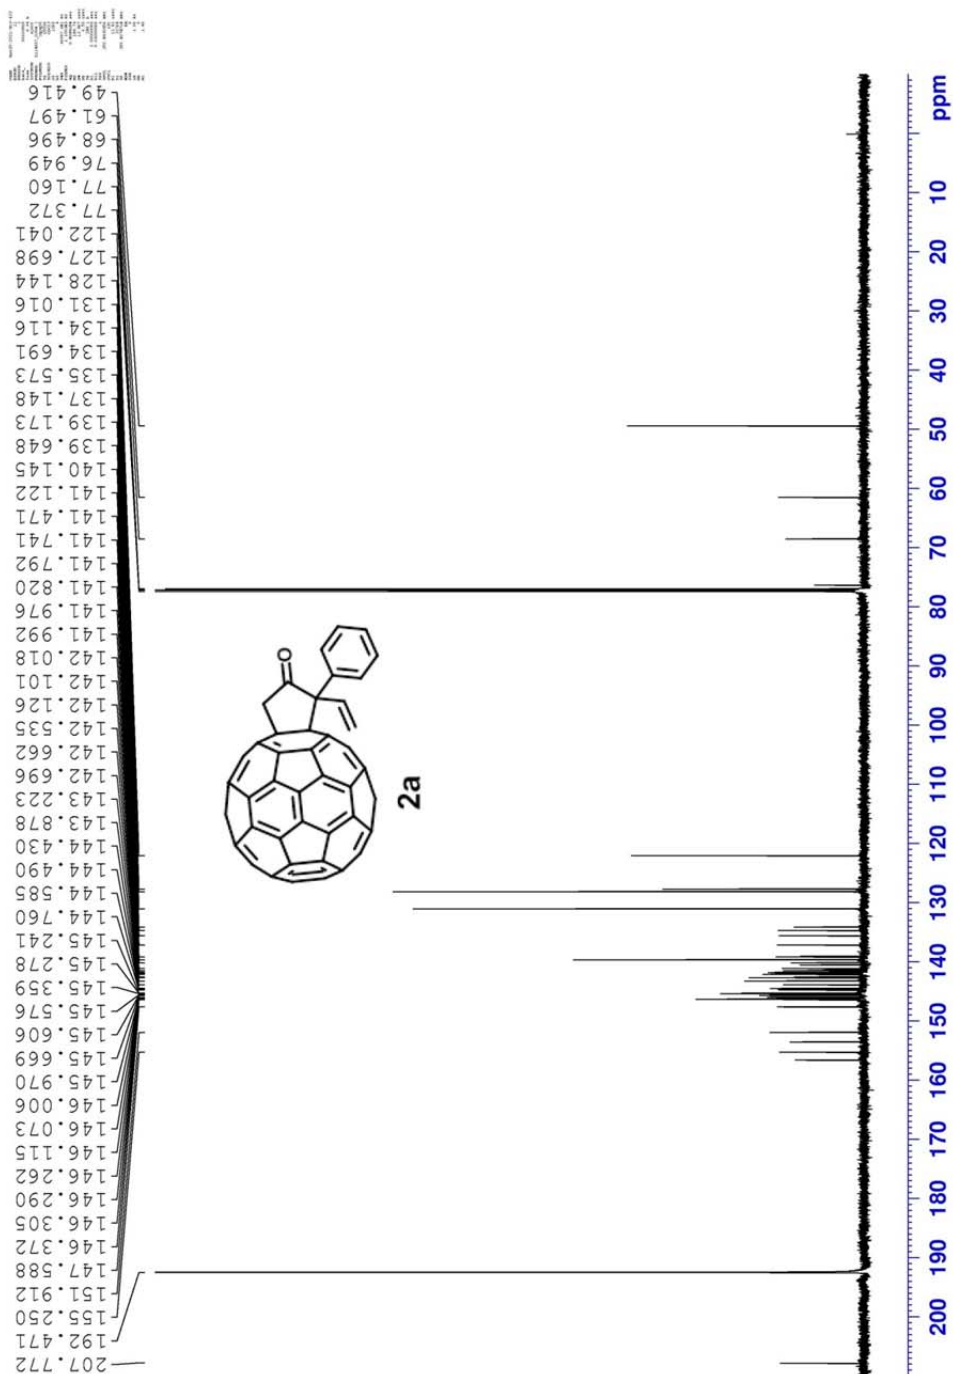

**Expanded  $^{13}\text{C}$  NMR (150 MHz,  $\text{CDCl}_3/\text{CS}_2$ ) of compound 2a**

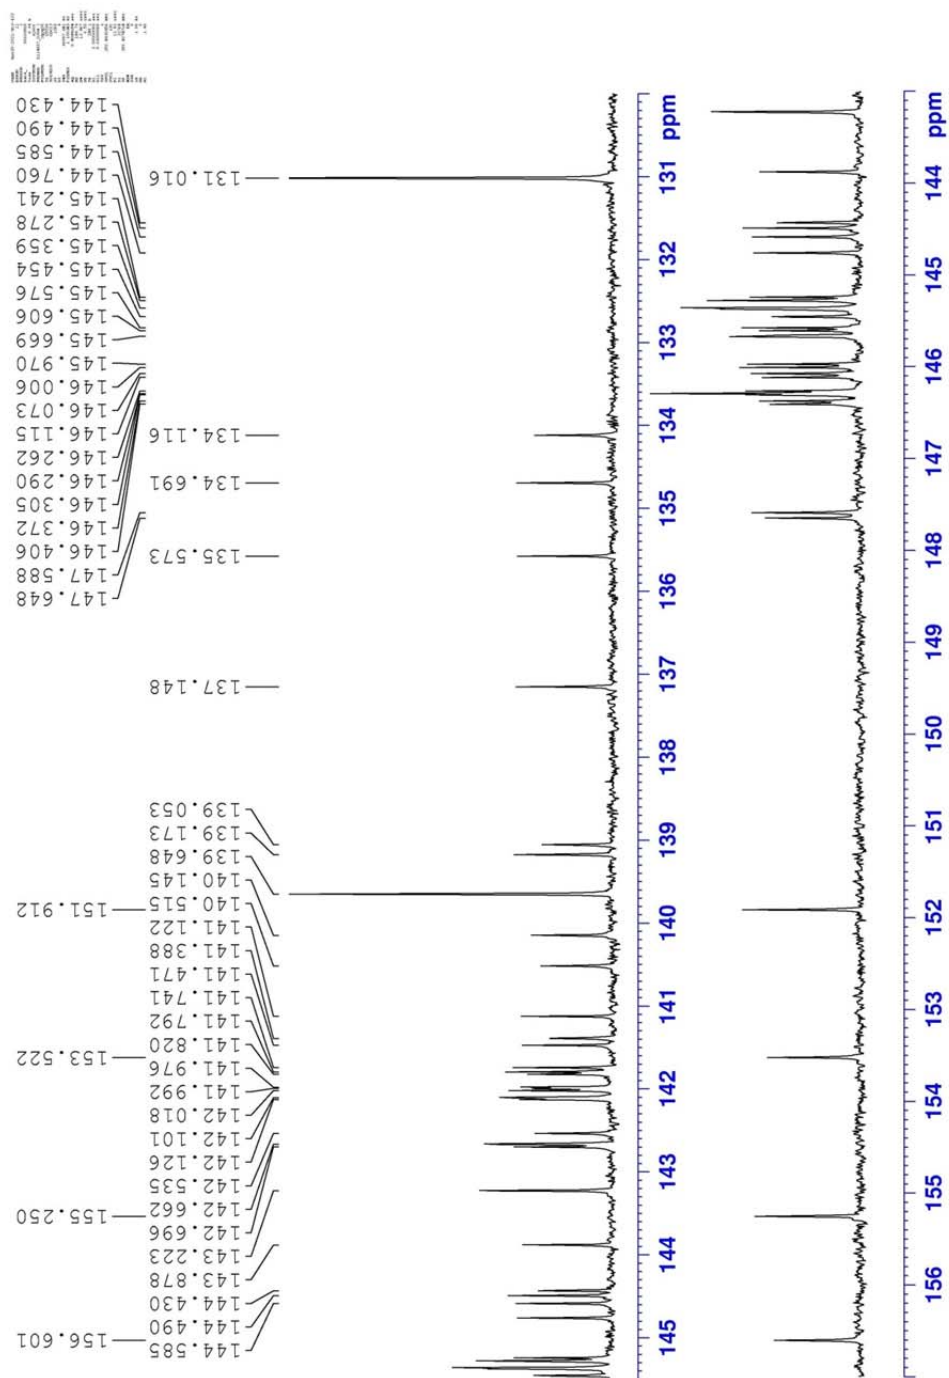

**<sup>1</sup>H NMR (600 MHz, CDCl<sub>3</sub>/CS<sub>2</sub>) of compound 2b**

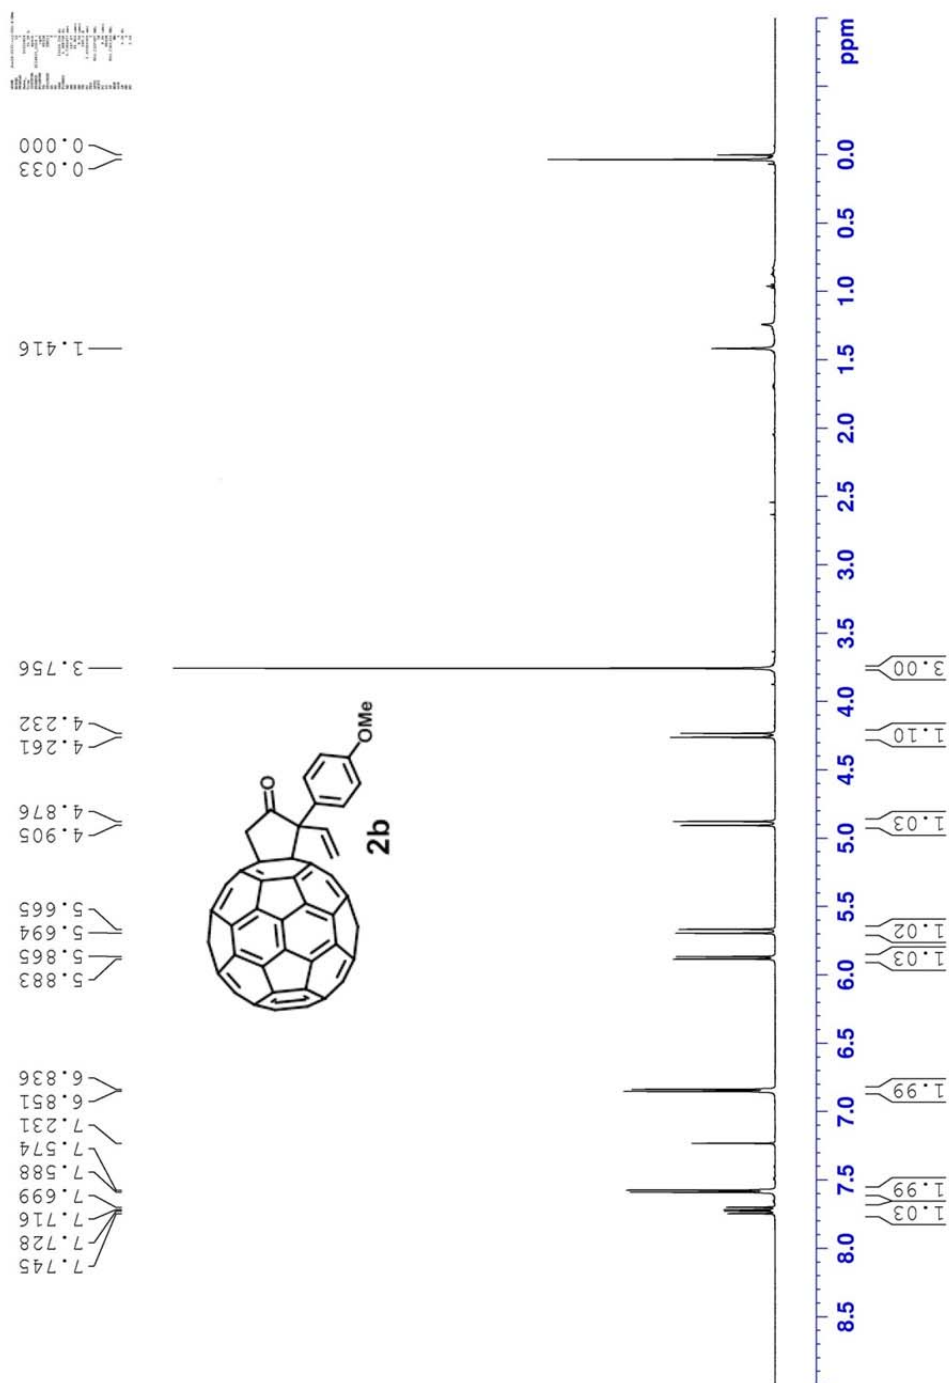

**$^{13}\text{C}$  NMR (150 MHz,  $\text{CDCl}_3/\text{CS}_2$ ) of compound 2b**

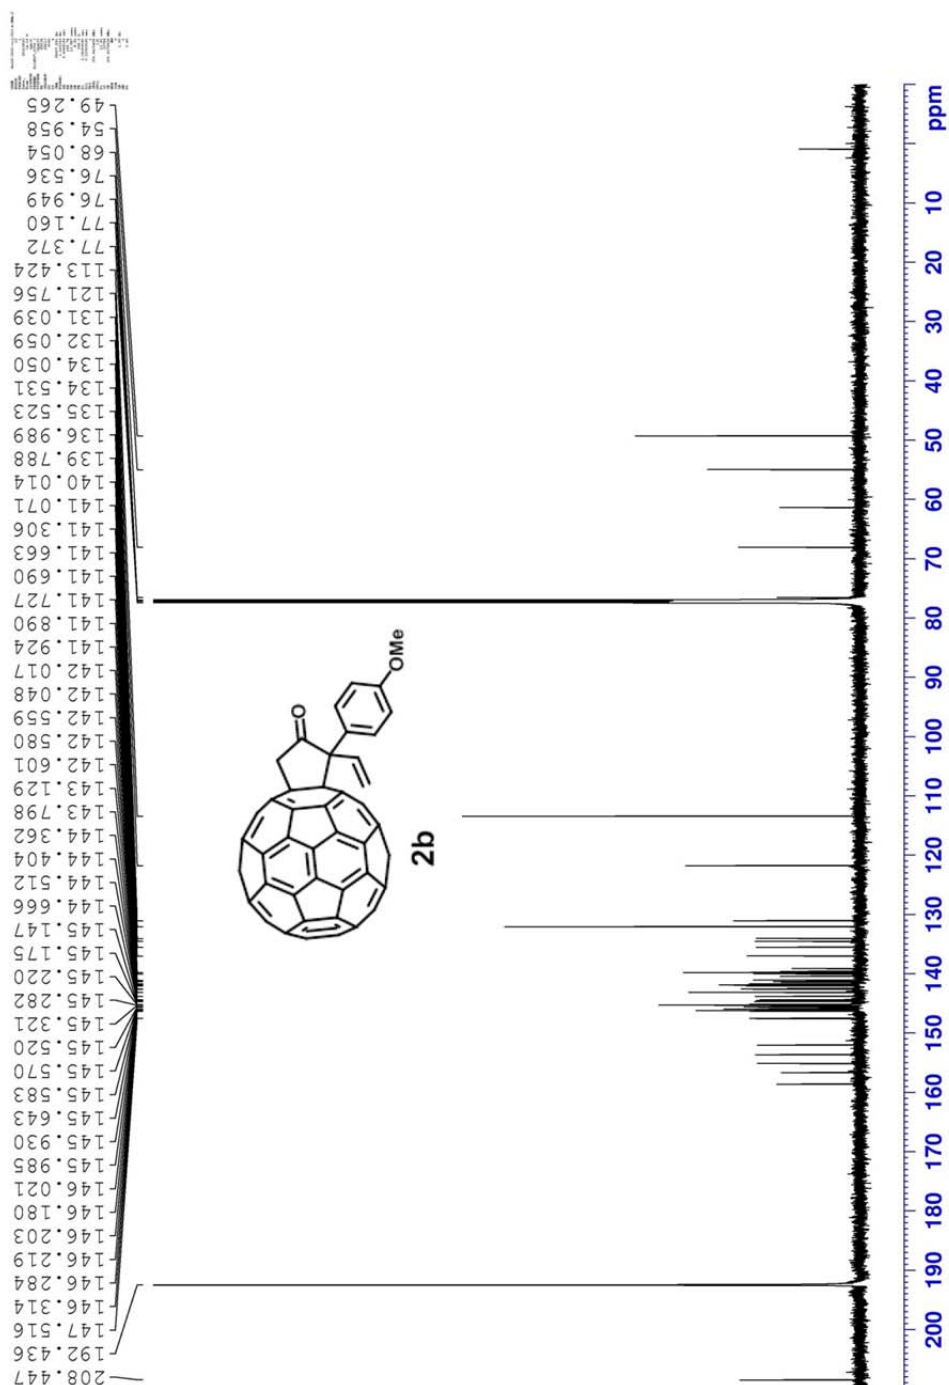

**Expanded  $^{13}\text{C}$  NMR (150 MHz,  $\text{CDCl}_3/\text{CS}_2$ ) of compound 2b**

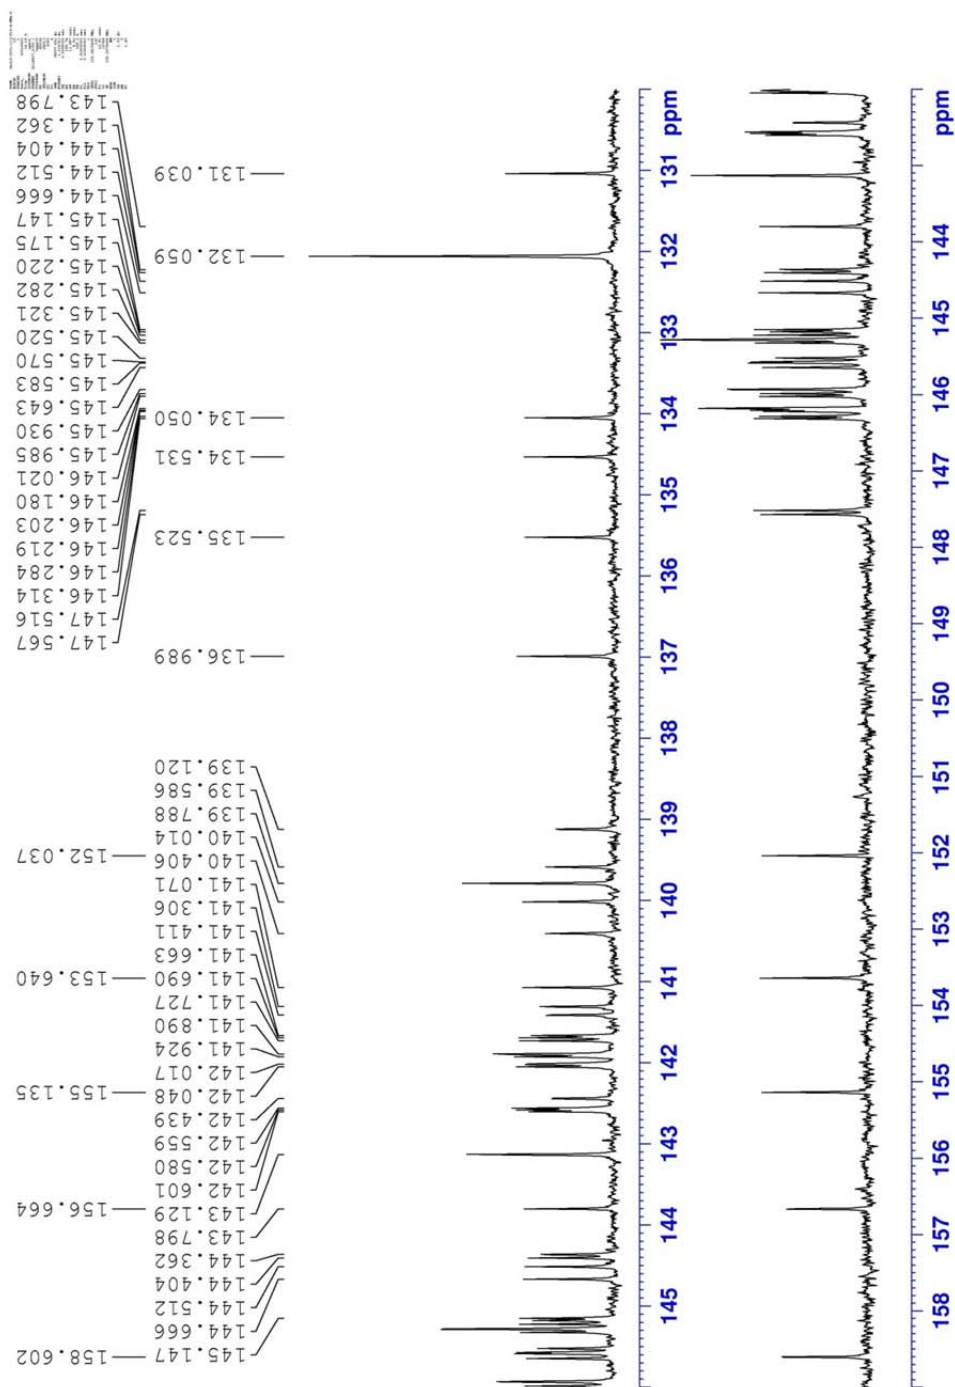

**$^1\text{H}$  NMR (600 MHz,  $\text{CDCl}_3/\text{CS}_2$ ) of compound **2c****

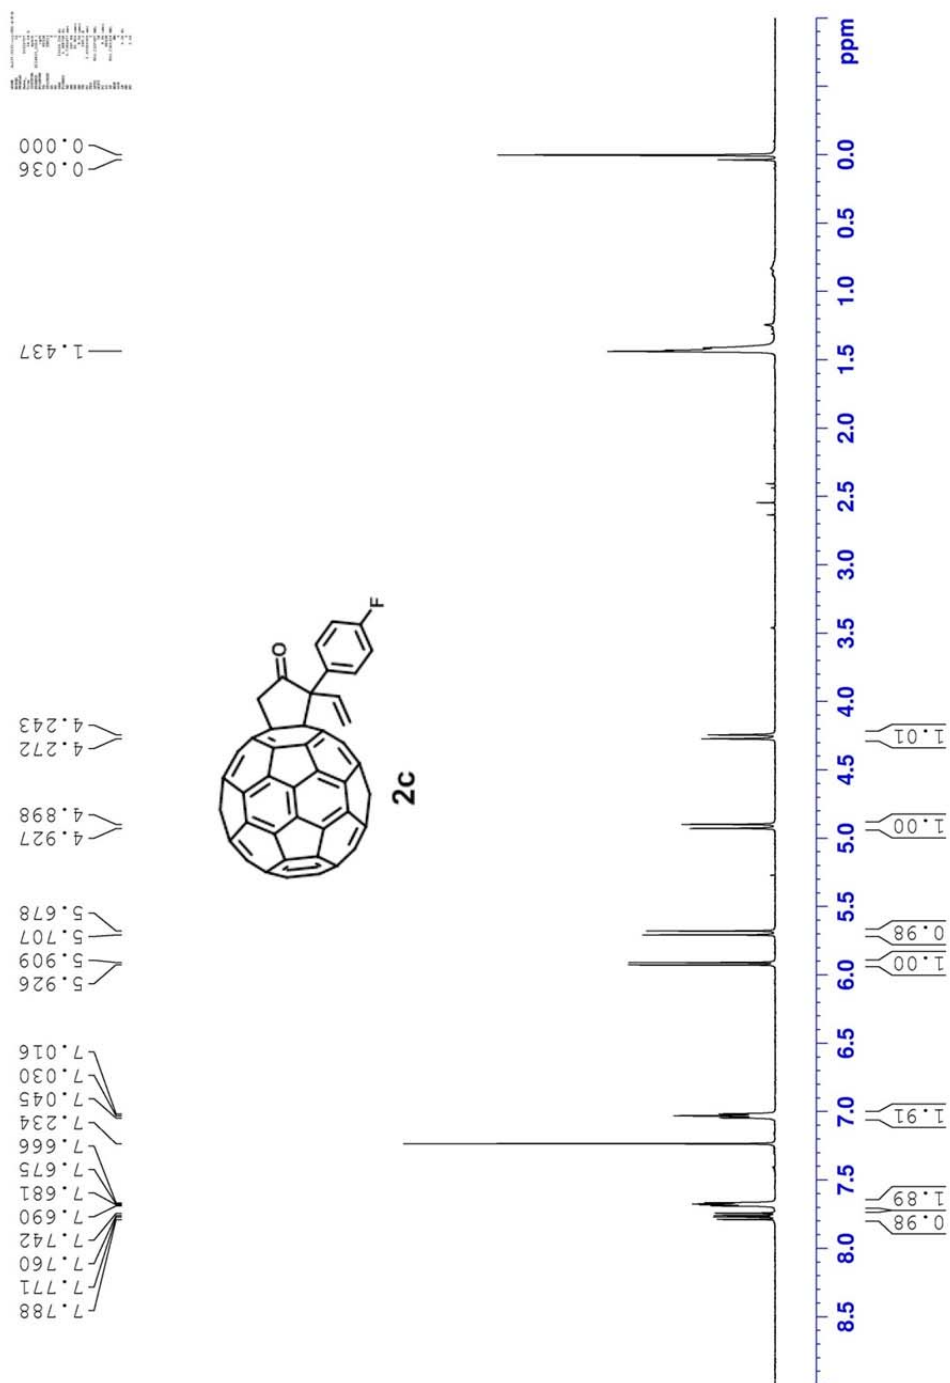

**$^{13}\text{C}$  NMR (150 MHz,  $\text{CDCl}_3/\text{CS}_2$ ) of compound 2c**

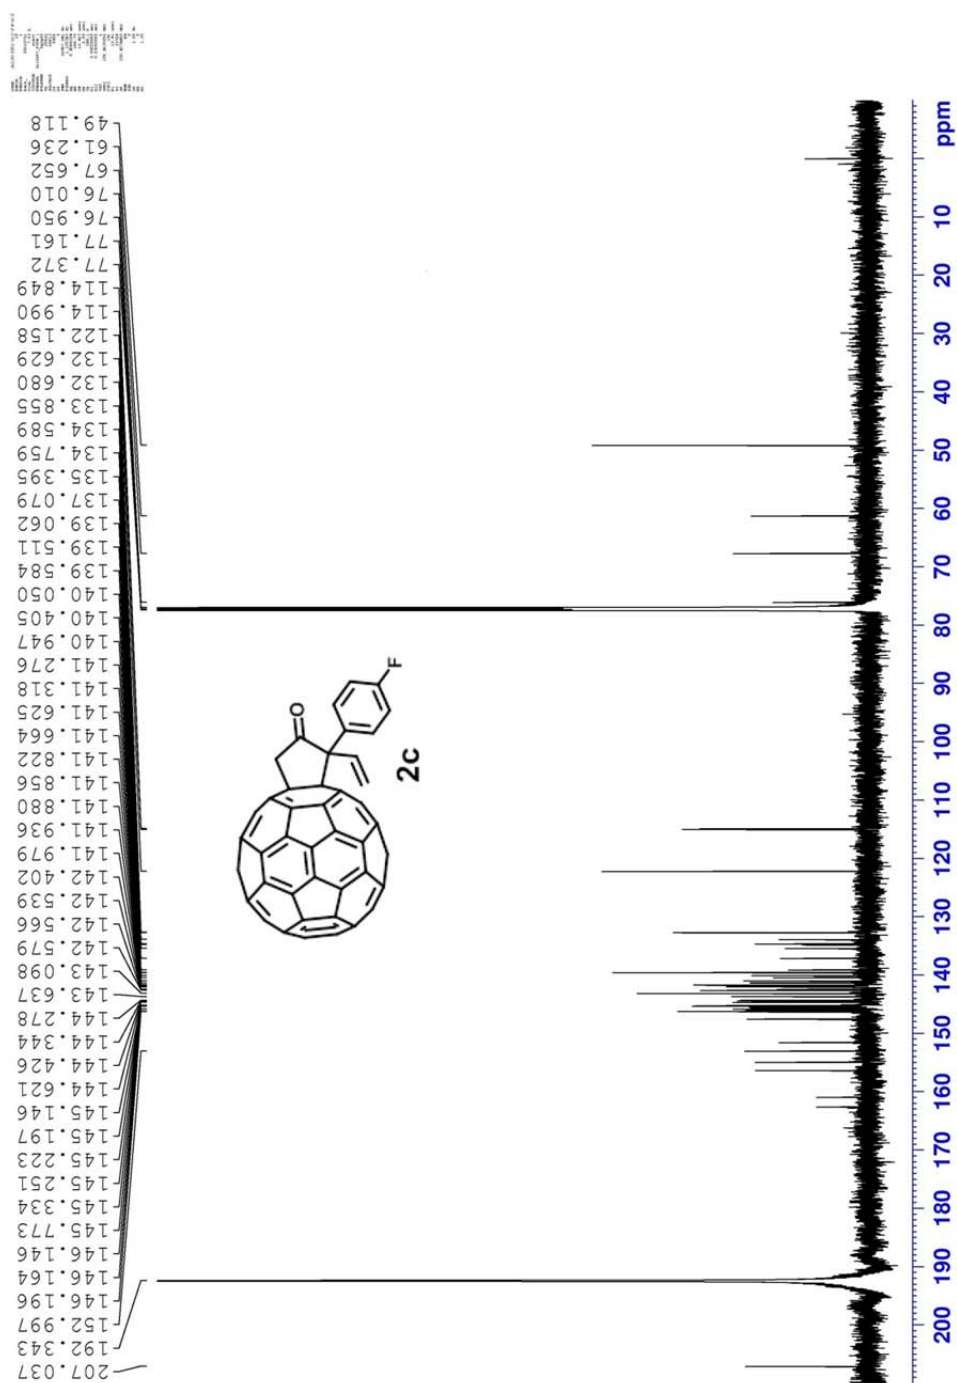

# Expanded $^{13}\text{C}$ NMR (150 MHz, $\text{CDCl}_3/\text{CS}_2$ ) of compound **2c**

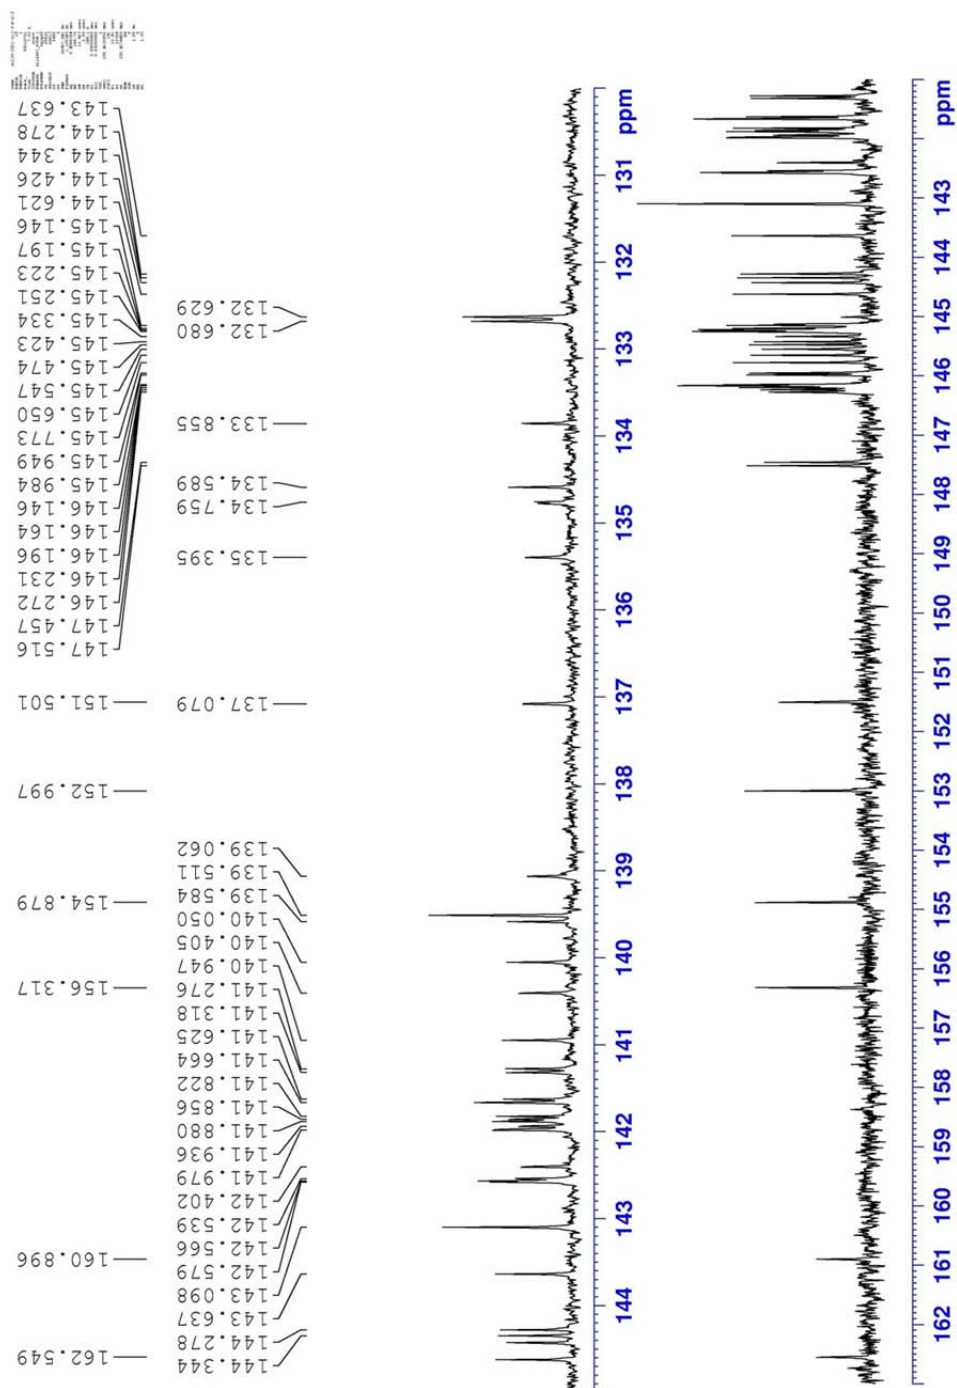

**$^{19}\text{F}$  NMR (377 MHz,  $\text{CDCl}_3/\text{CS}_2$ ) of compound **2c****

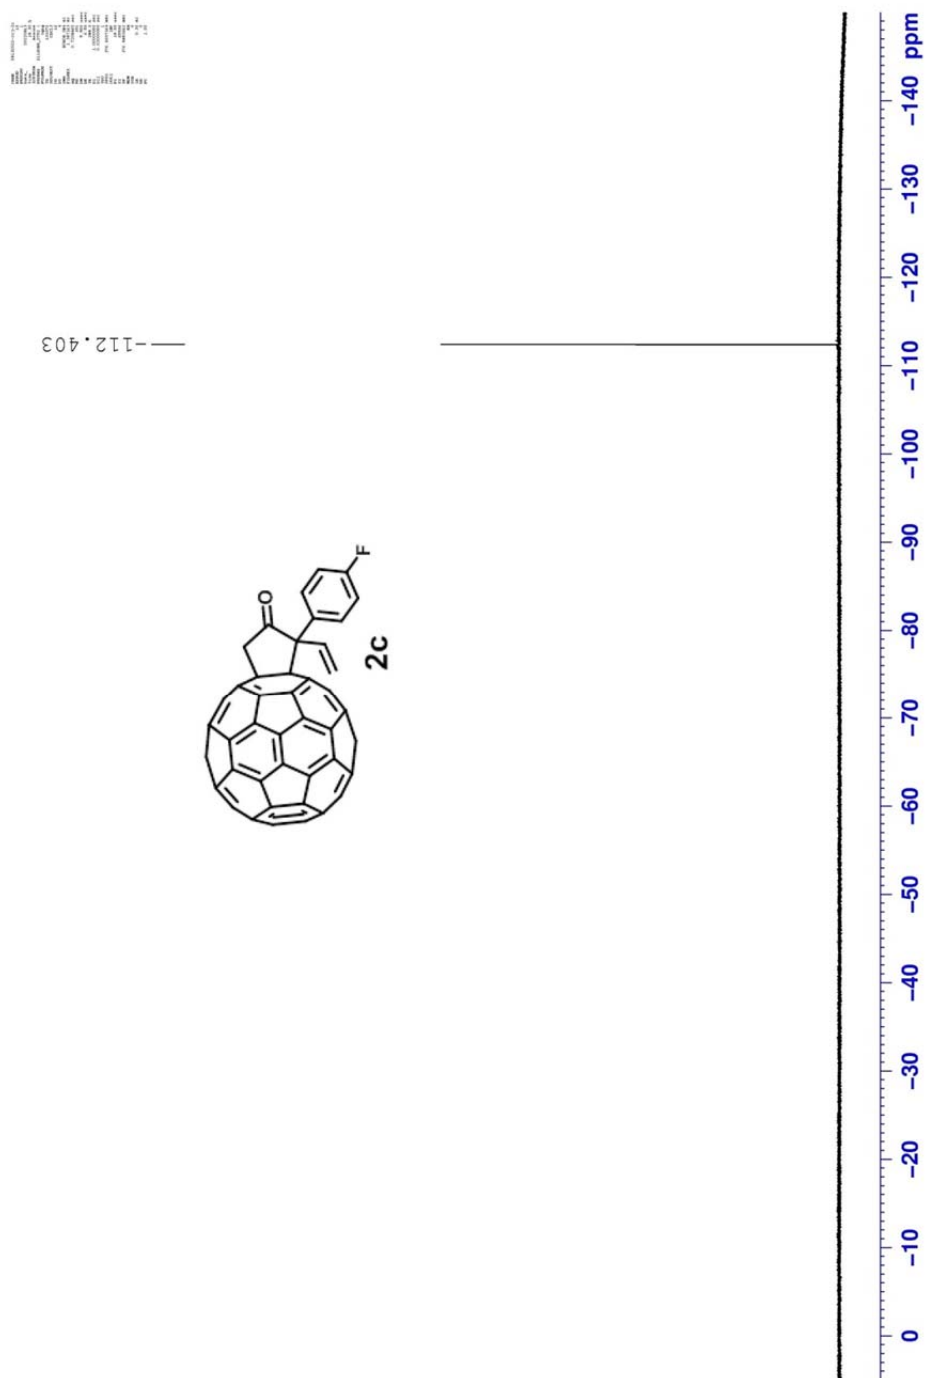

**$^1\text{H}$  NMR (400 MHz,  $\text{CDCl}_3/\text{CS}_2$ ) of compound 2d**

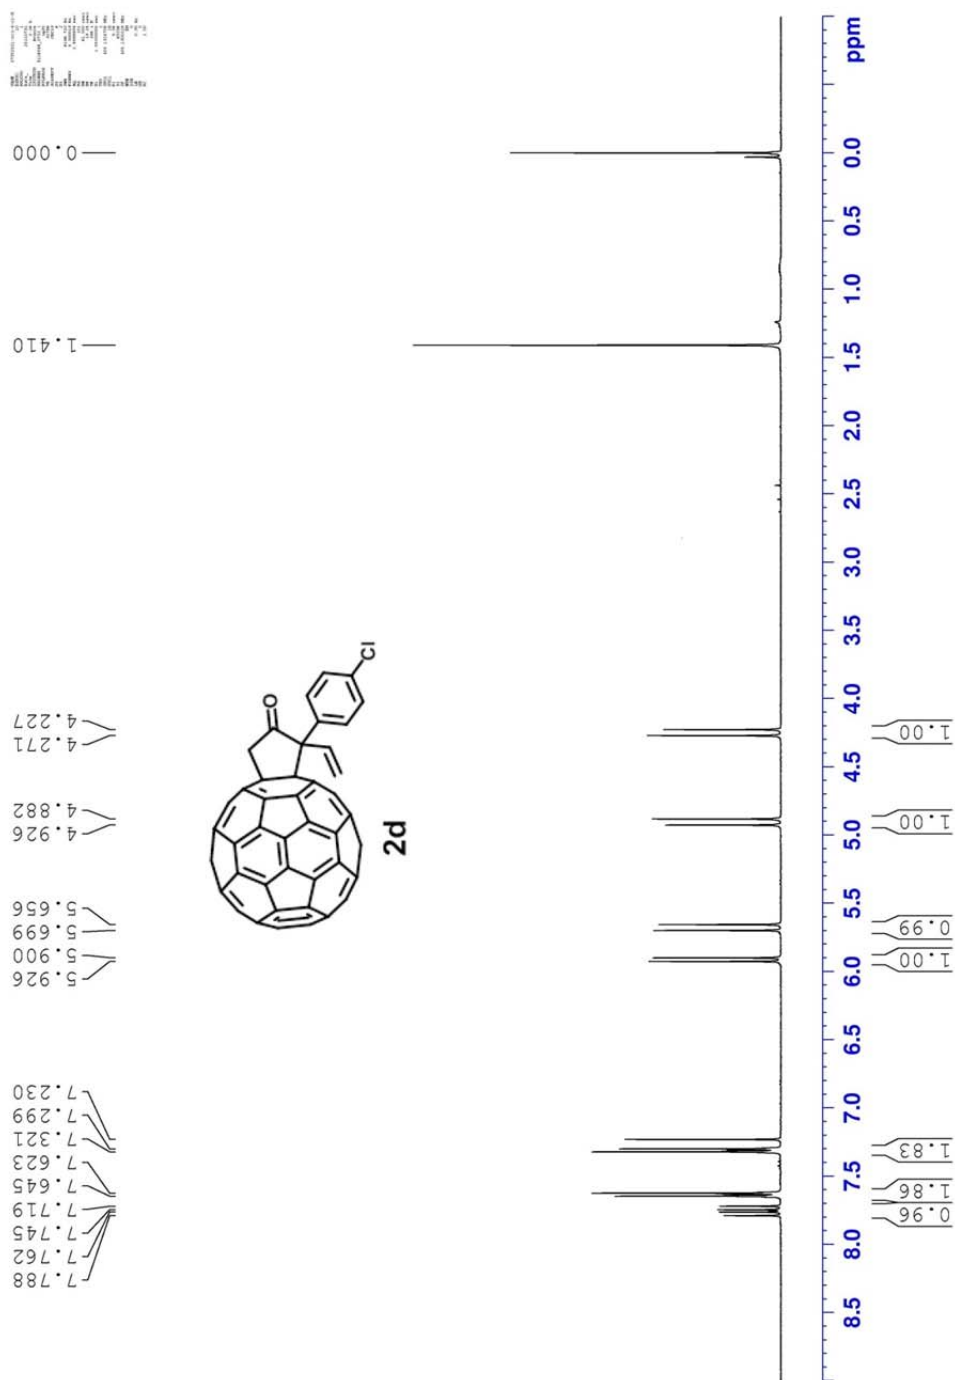

**$^{13}\text{C}$  NMR (150 MHz,  $\text{CDCl}_3/\text{CS}_2$ ) of compound 2d**

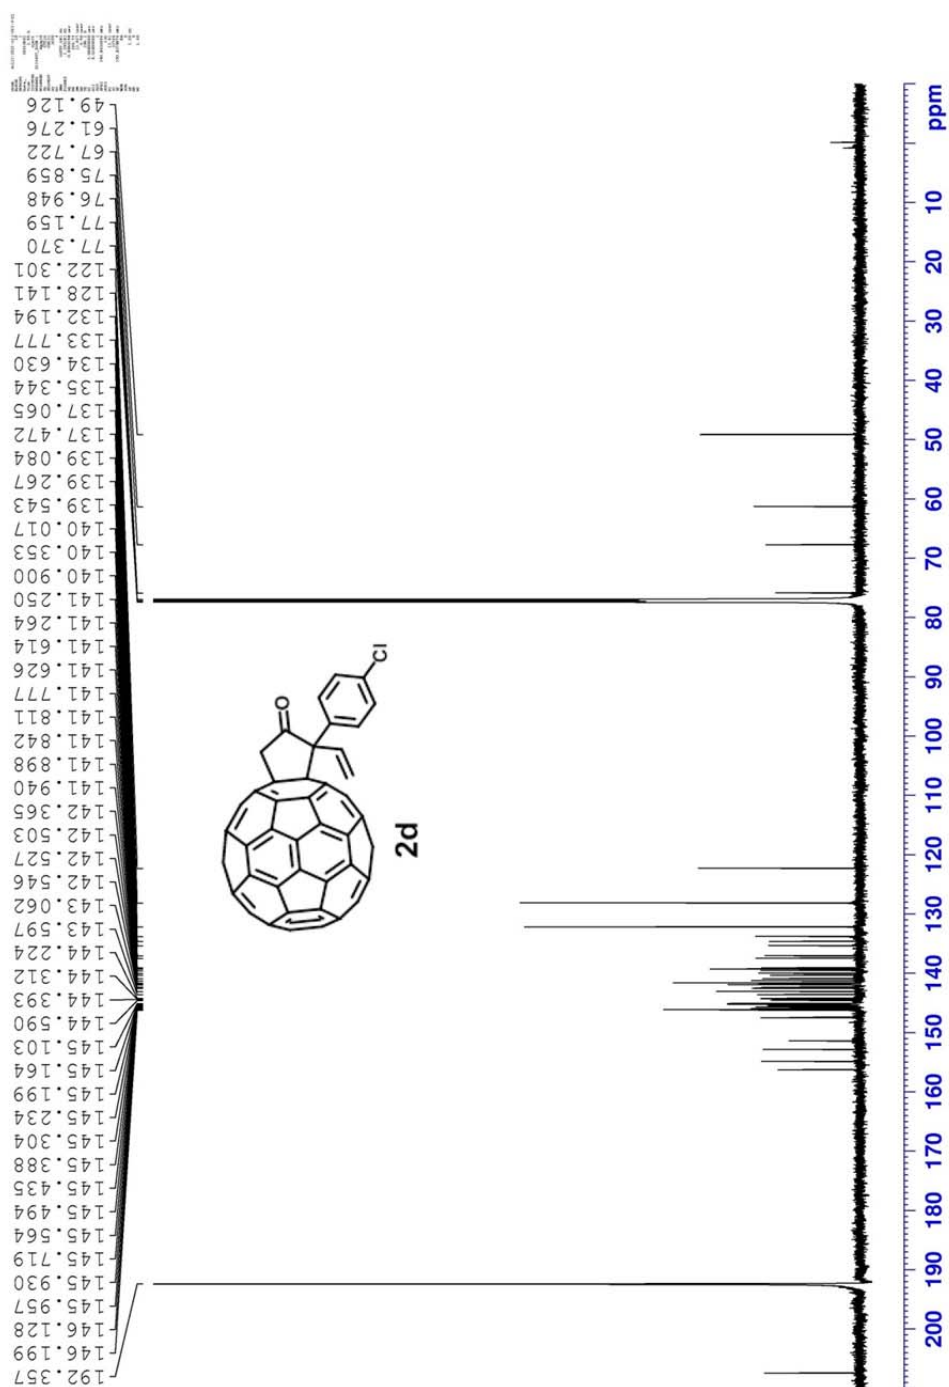

**Expanded  $^{13}\text{C}$  NMR (150 MHz,  $\text{CDCl}_3/\text{CS}_2$ ) of compound 2d**

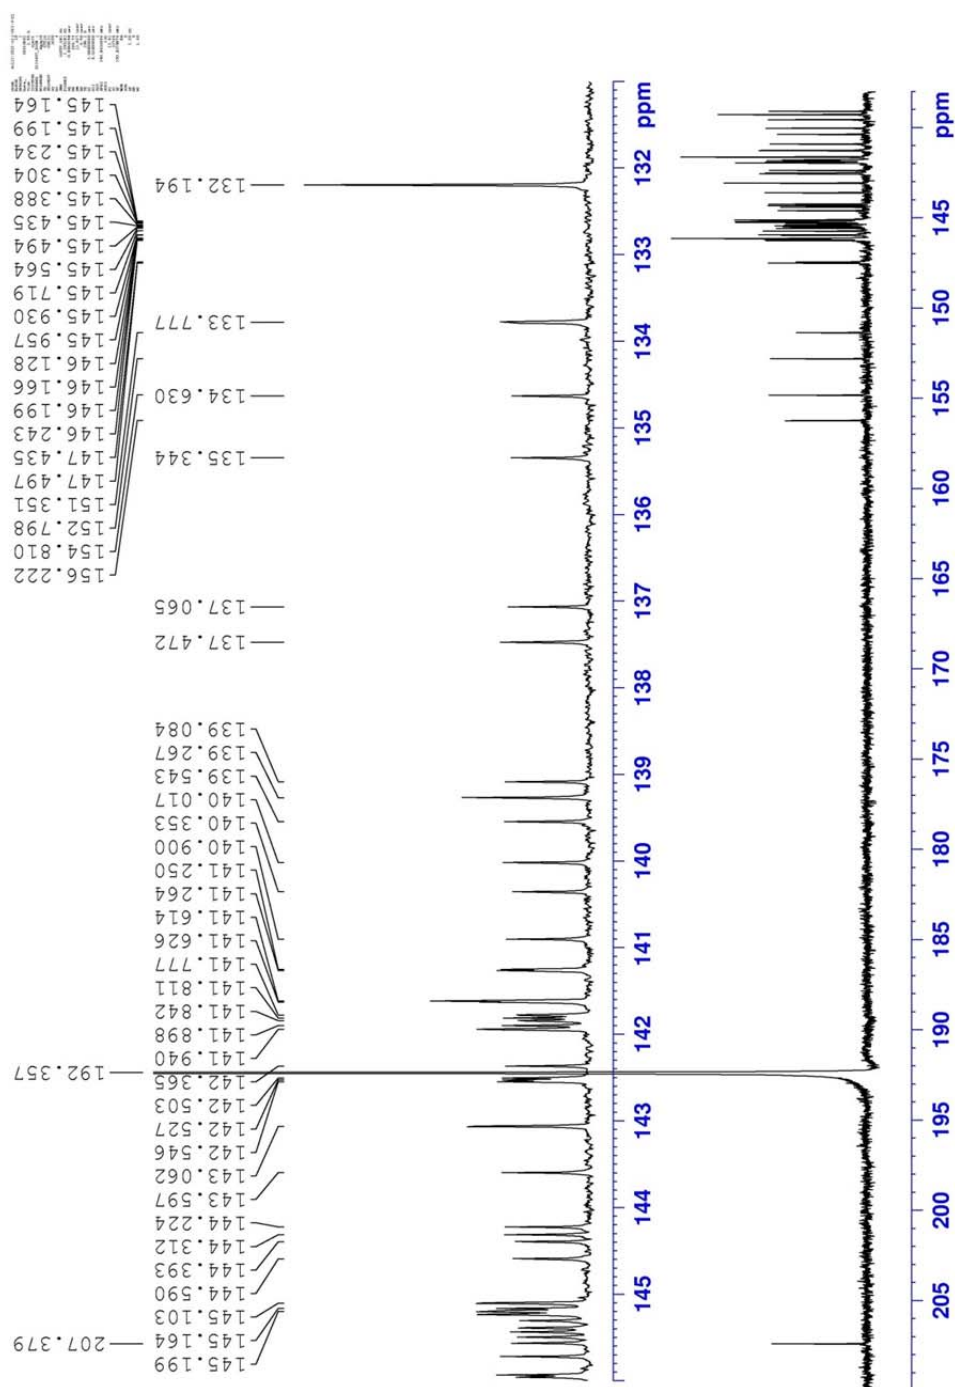

**<sup>1</sup>H NMR (600 MHz, CDCl<sub>3</sub>/CS<sub>2</sub>) of compound 2e**

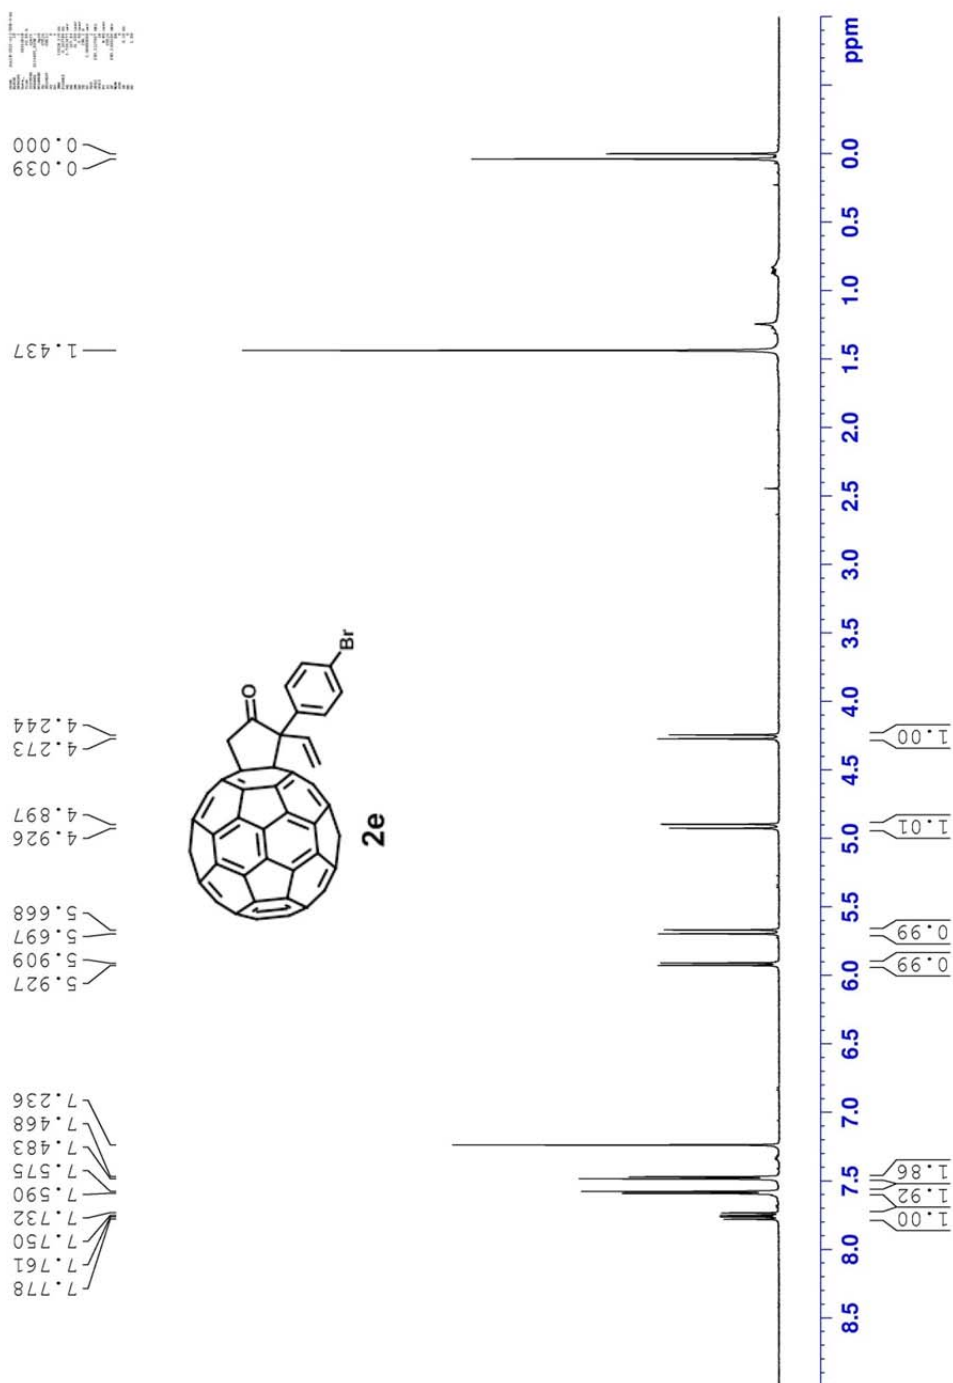

Chemical structure of compound **2e** is shown. The structure is a C<sub>60</sub> fullerene cage substituted with a 4-bromophenyl group and a 2-oxo-1,3-dihydroisobenzofuran-5-yl group. The <sup>13</sup>C NMR spectrum (CDCl<sub>3</sub>) is displayed below the structure, showing peaks from 192.5 to 49.3 ppm. The x-axis is labeled ppm and ranges from 200 to 0.

Chemical structure of compound **2e** is shown. The structure is a C<sub>60</sub> fullerene cage substituted with a 4-bromophenyl group and a 2-oxo-1,3-dihydroisobenzofuran-5-yl group. The <sup>13</sup>C NMR spectrum (CDCl<sub>3</sub>) is displayed below the structure, showing peaks from 192.5 to 49.3 ppm. The x-axis is labeled ppm and ranges from 200 to 0.

Expanded  $^{13}\text{C}$  NMR (150 MHz,  $\text{CDCl}_3/\text{CS}_2$ ) of compound 2e

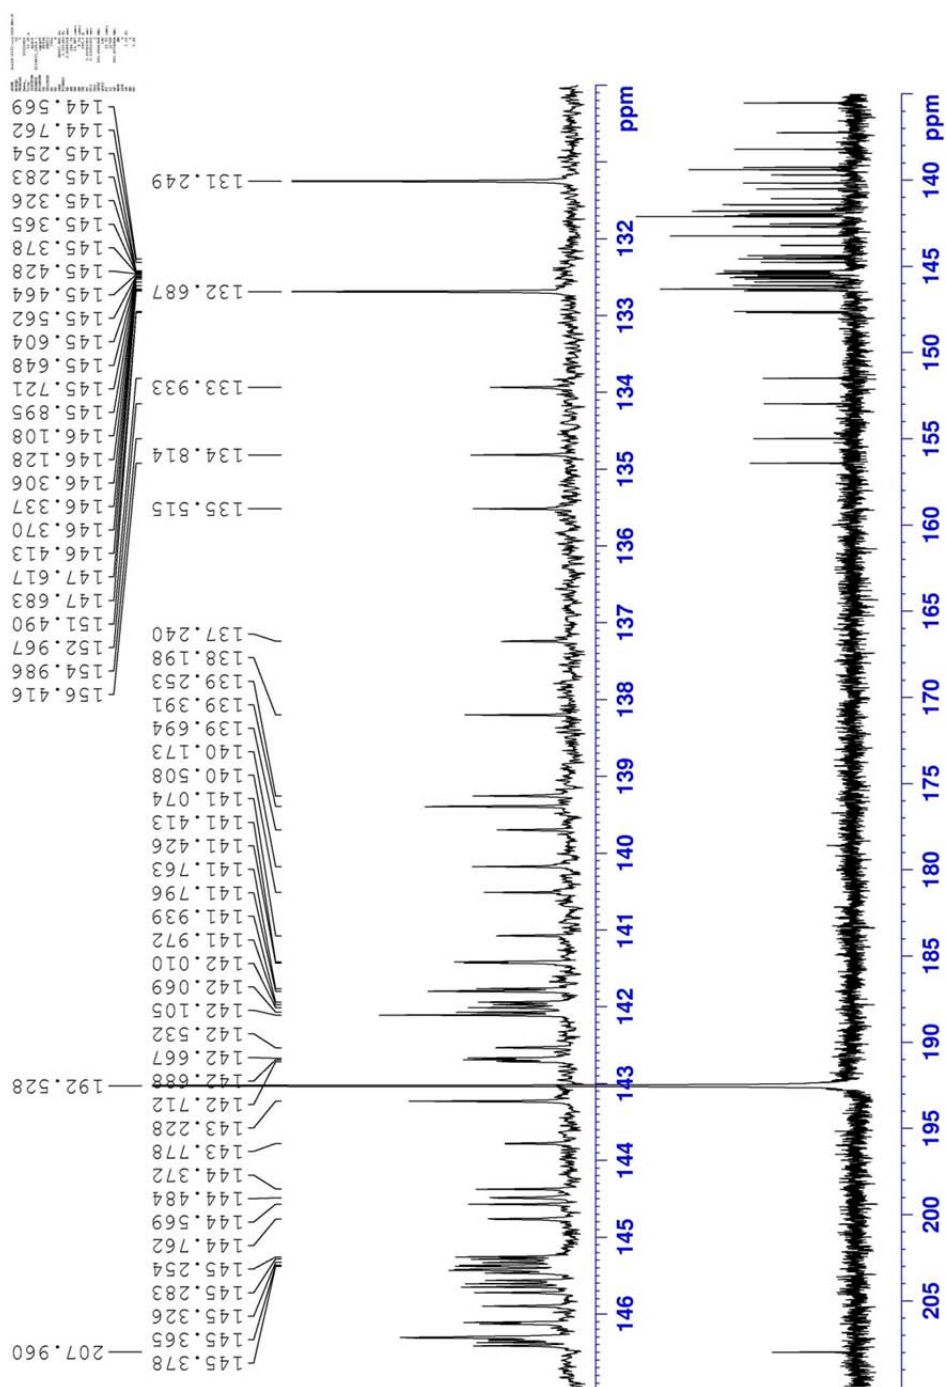

**$^1\text{H}$  NMR (400 MHz,  $\text{CDCl}_3/\text{CS}_2$ ) of compound 2f**

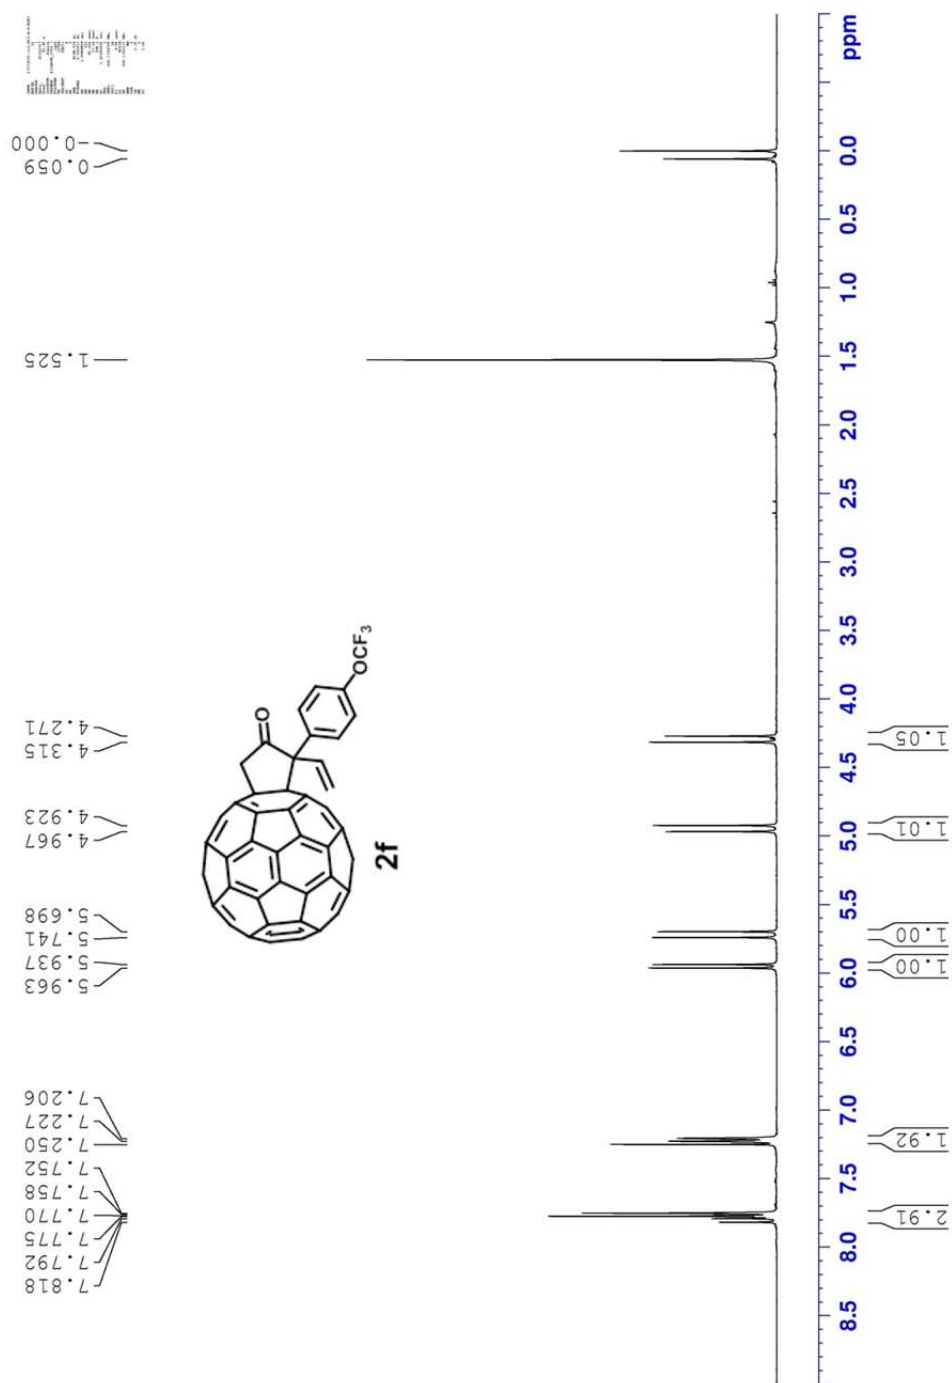

**$^{13}\text{C}$  NMR (150 MHz,  $\text{CDCl}_3/\text{CS}_2$ ) of compound 2f**

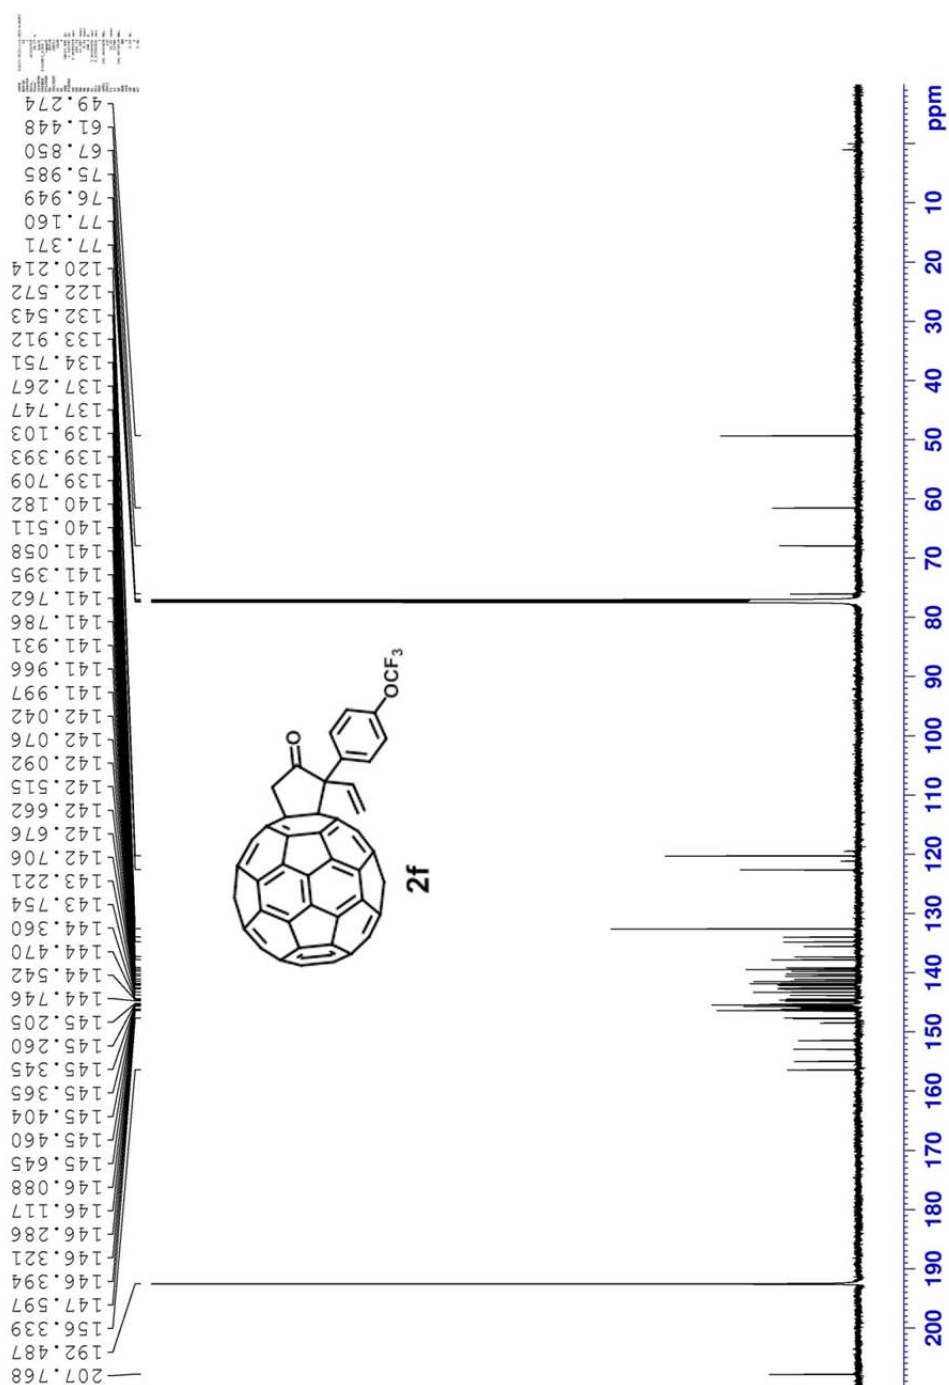

# Expanded $^{13}\text{C}$ NMR (150 MHz, $\text{CDCl}_3/\text{CS}_2$ ) of compound 2f

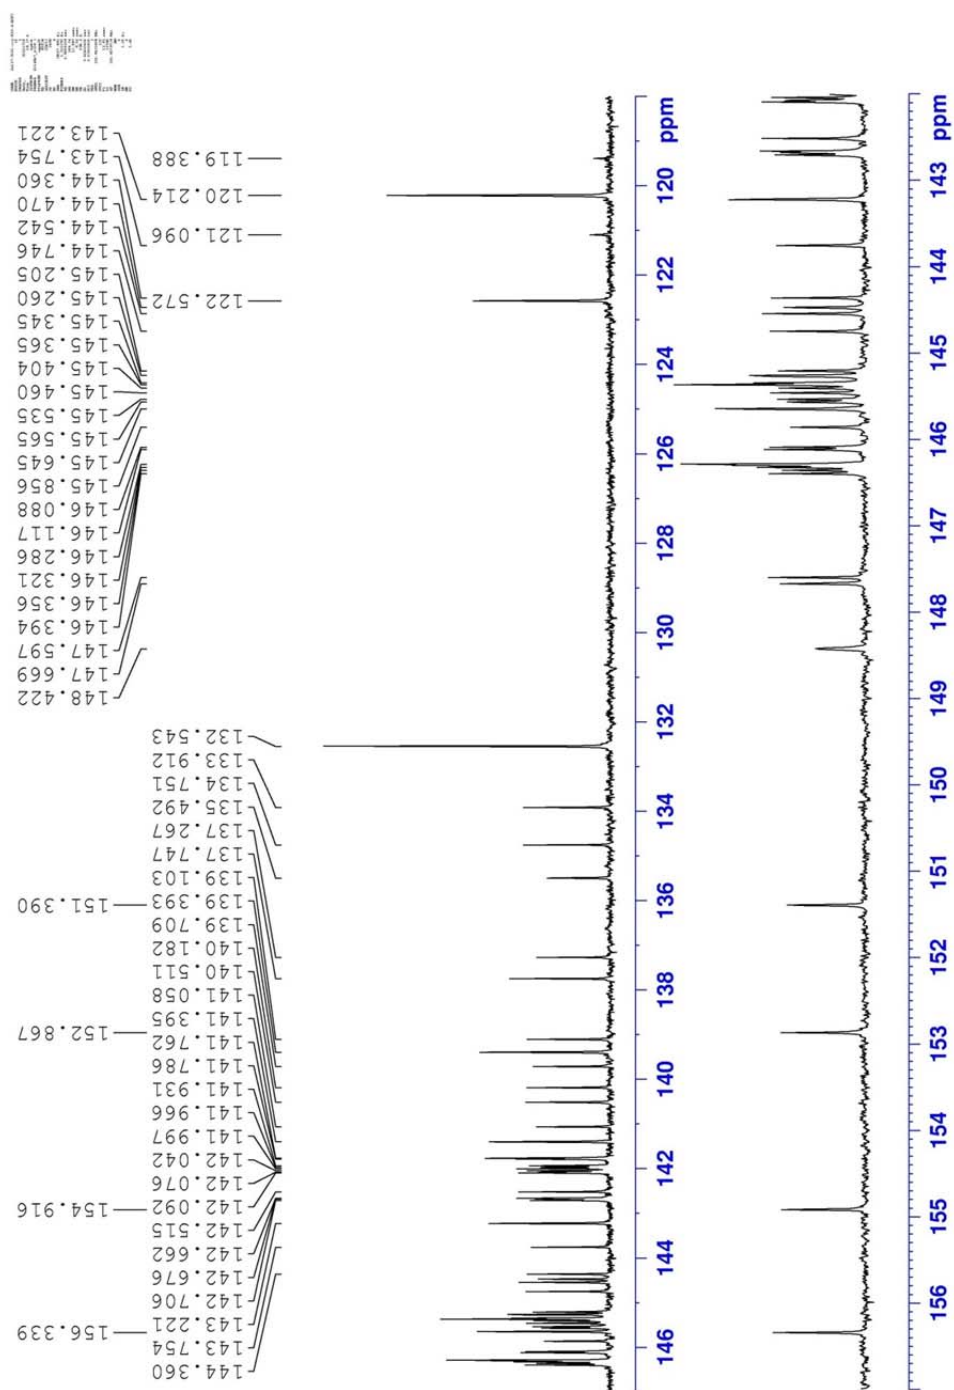

**$^{19}\text{F}$  NMR (565 MHz,  $\text{CDCl}_3/\text{CS}_2$ ) of compound **2f****

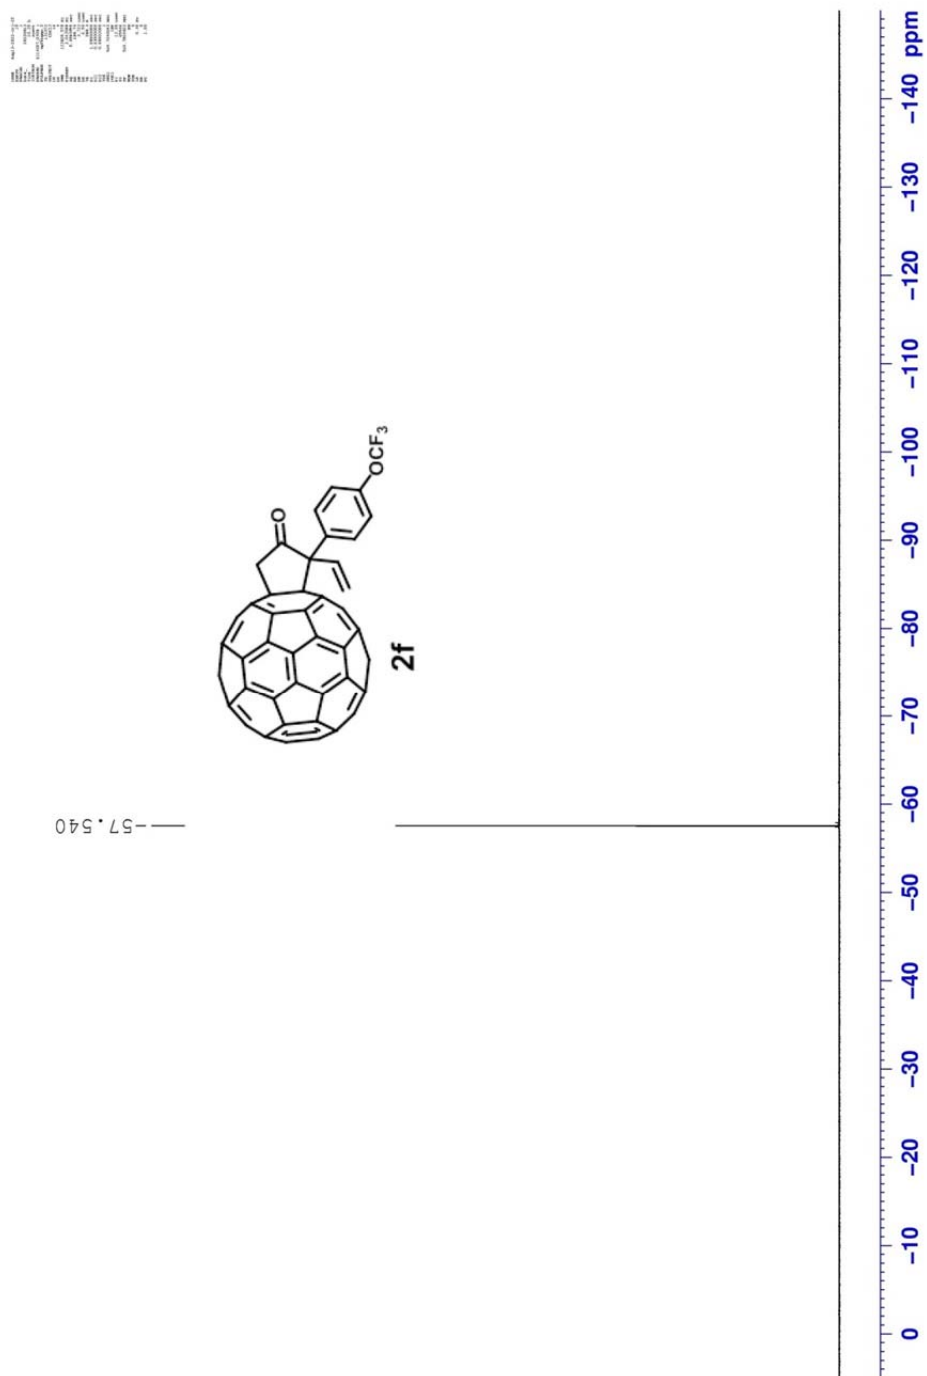

**<sup>1</sup>H NMR (400 MHz, CDCl<sub>3</sub>/CS<sub>2</sub>) of compound 2g**

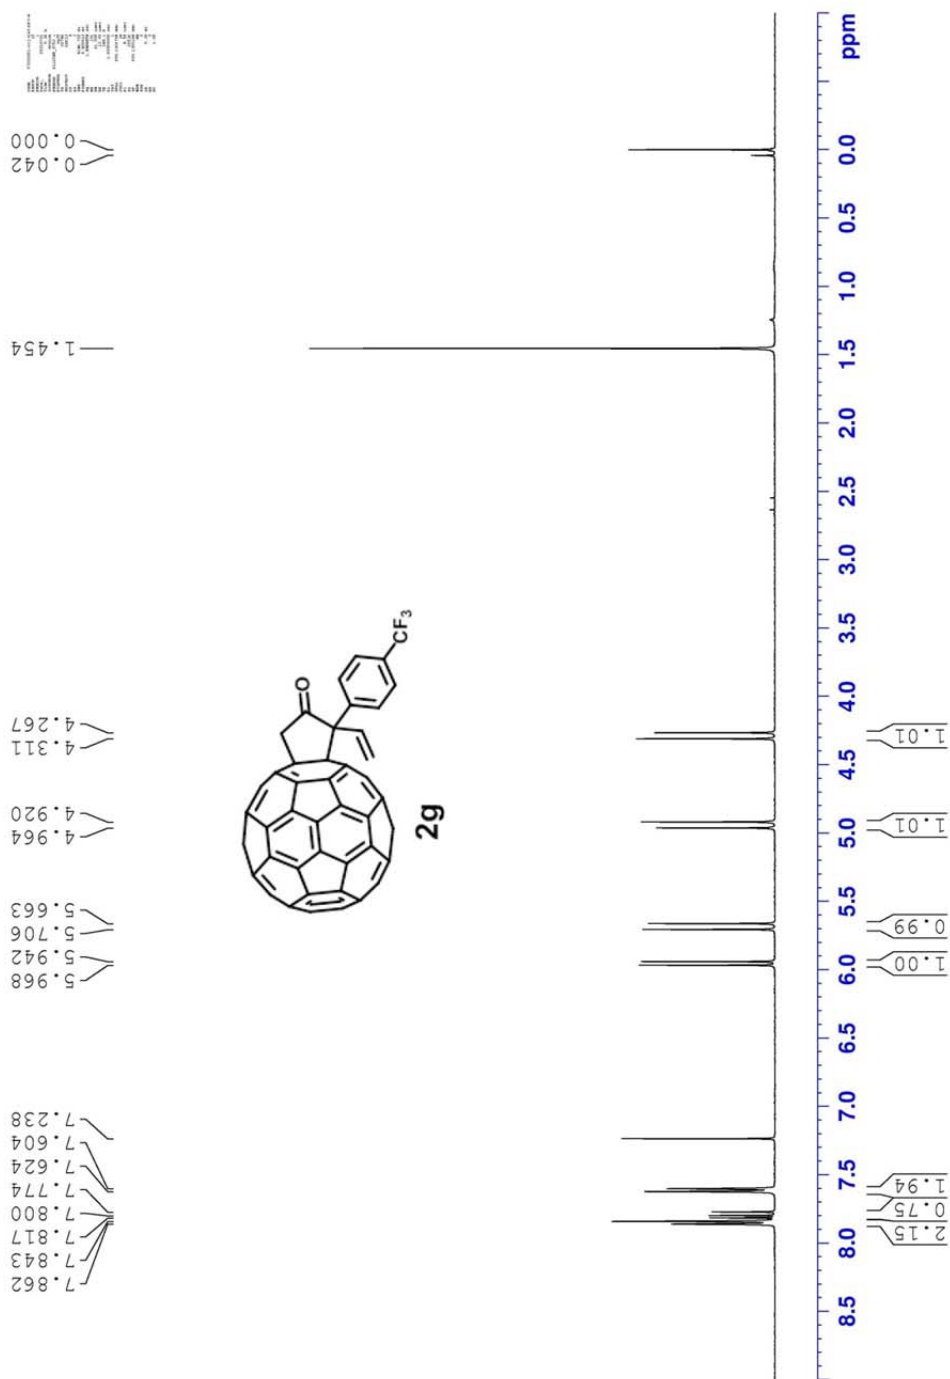

**$^{13}\text{C}$  NMR (150 MHz,  $\text{CDCl}_3/\text{CS}_2$ ) of compound **2g****

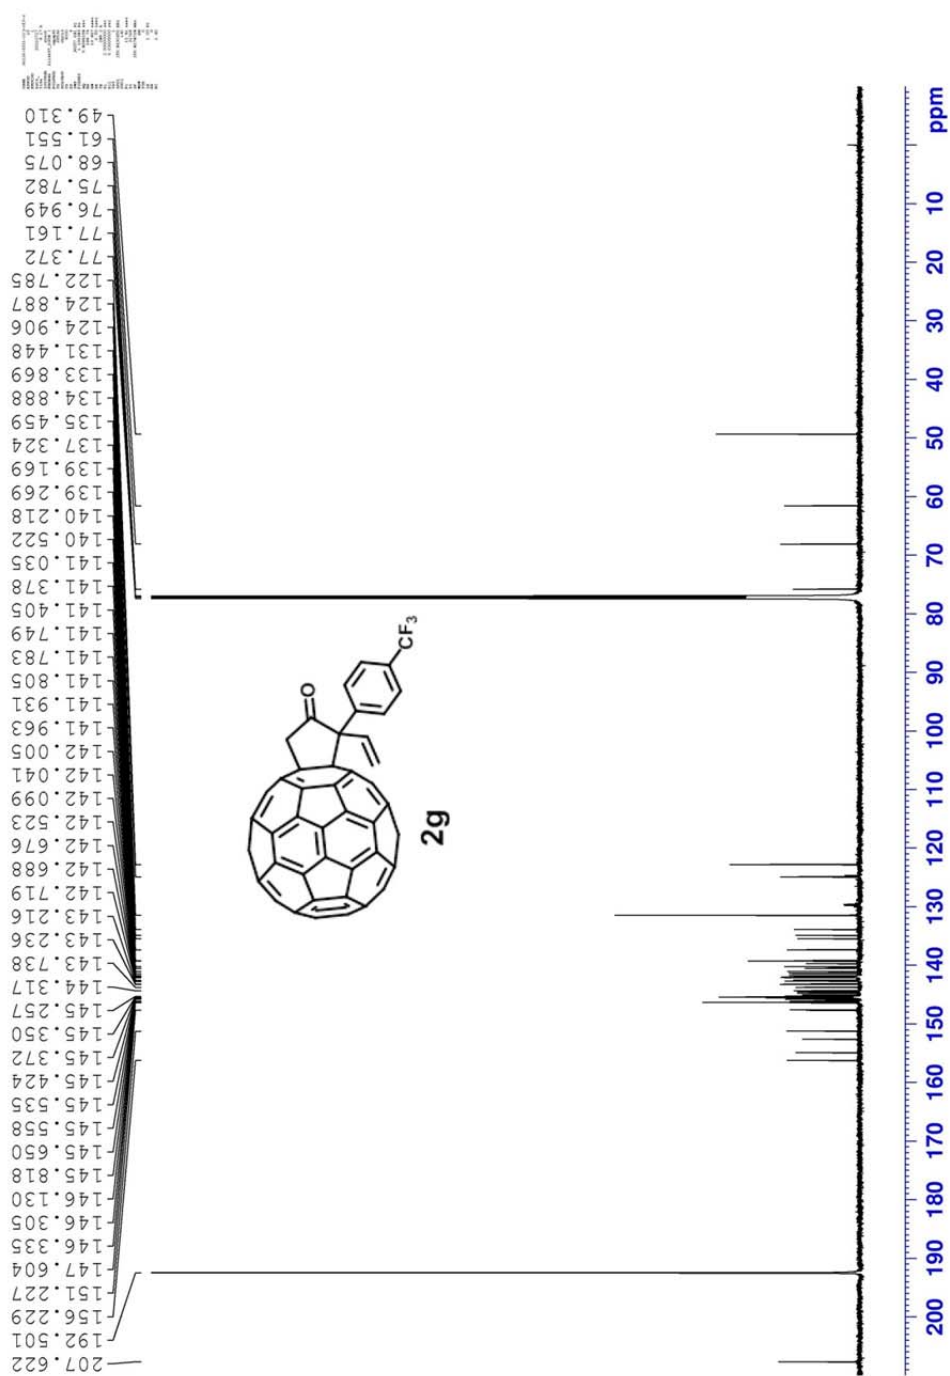

**Expanded  $^{13}\text{C}$  NMR (150 MHz,  $\text{CDCl}_3/\text{CS}_2$ ) of compound 2g**

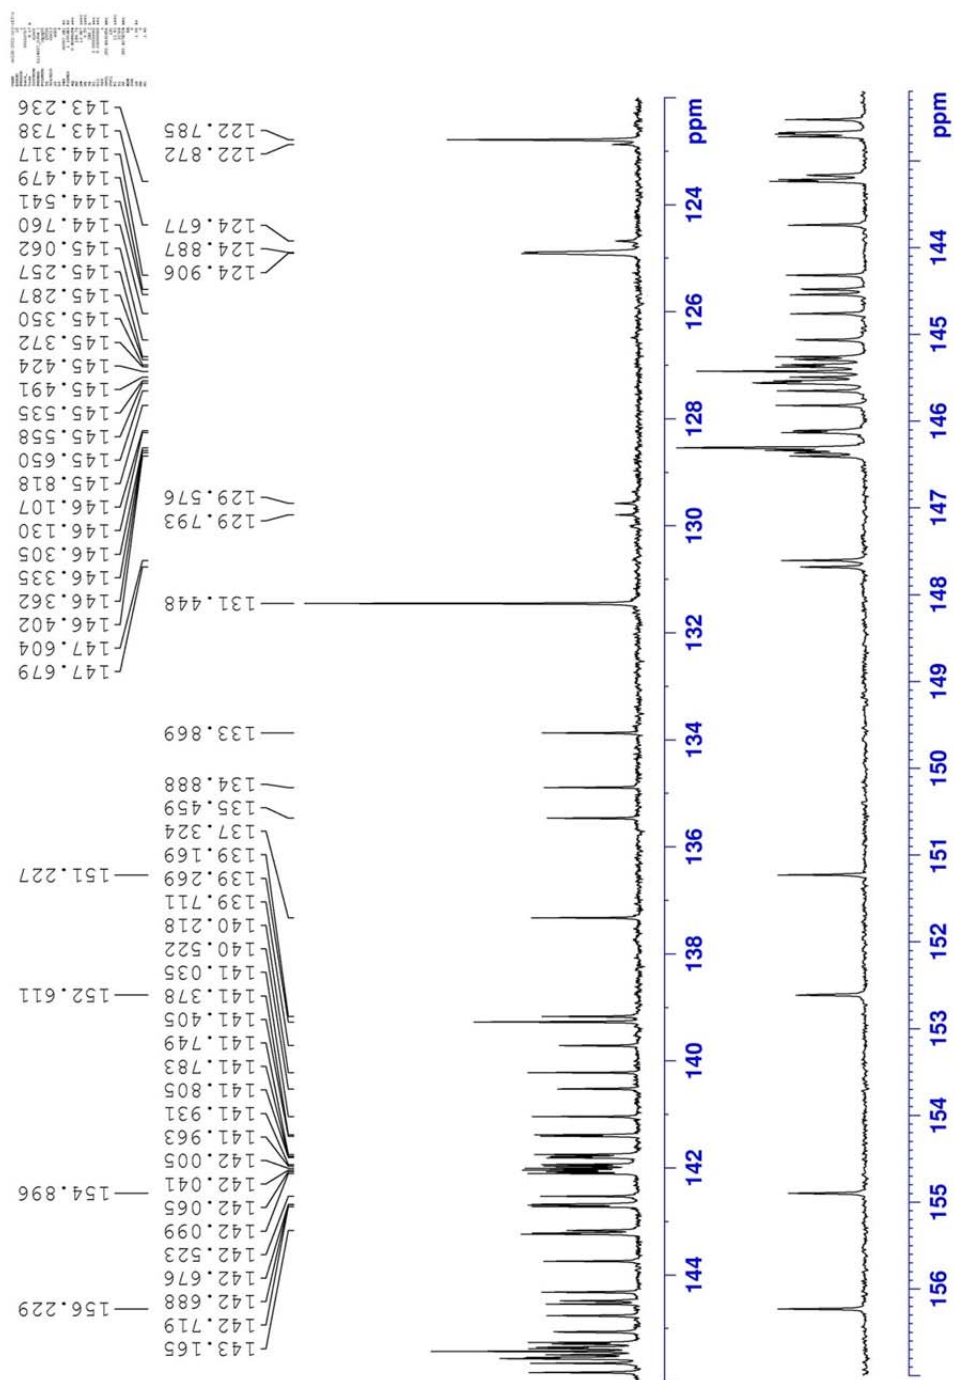

**$^{19}\text{F}$  NMR (565 MHz,  $\text{CDCl}_3/\text{CS}_2$ ) of compound 2g**

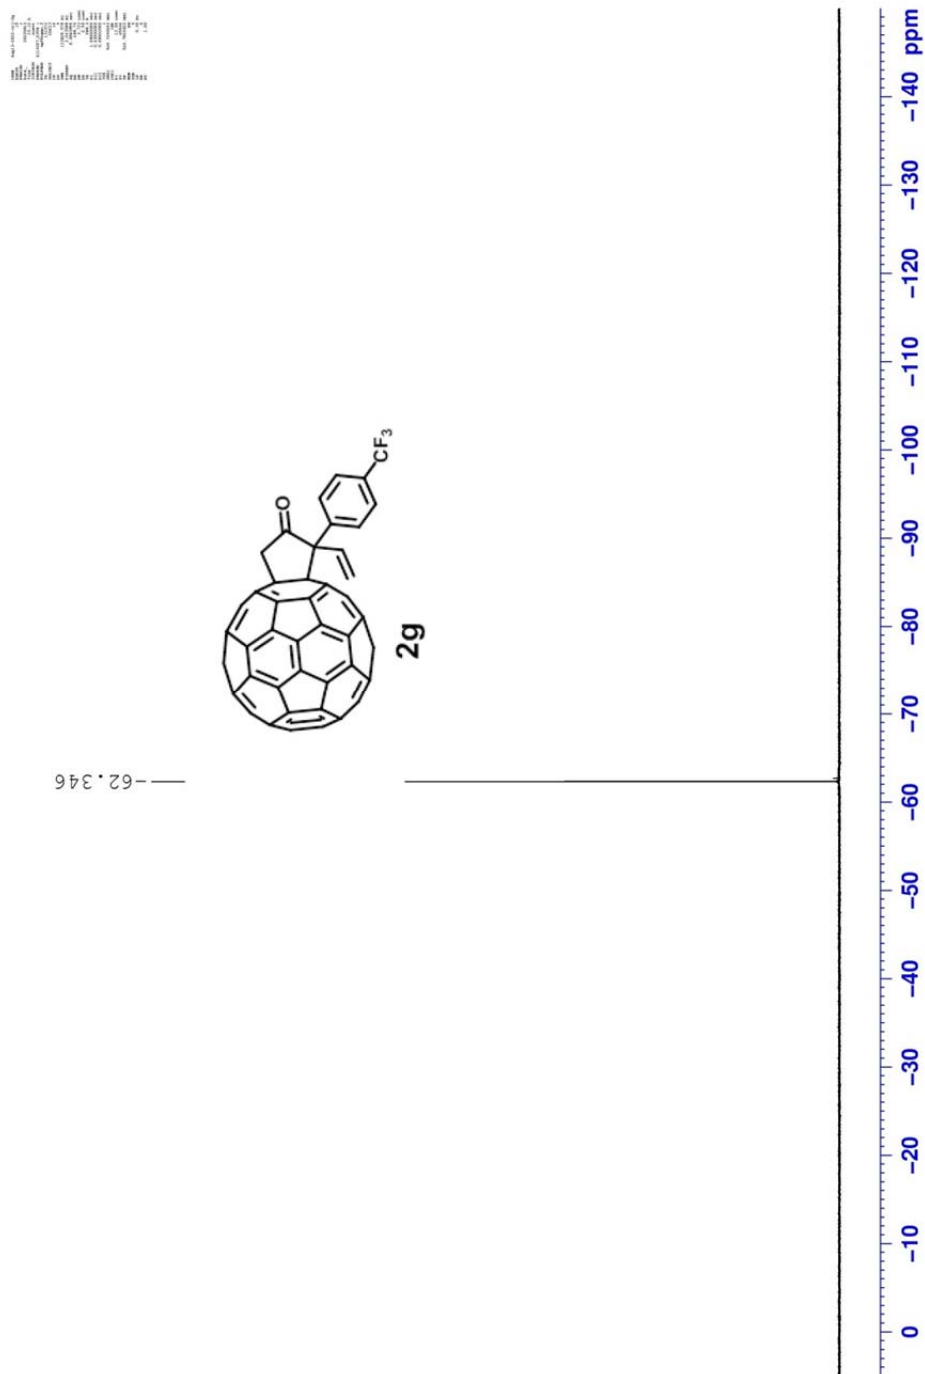

**<sup>1</sup>H NMR (600 MHz, CDCl<sub>3</sub>/CS<sub>2</sub>) of compound 2h**

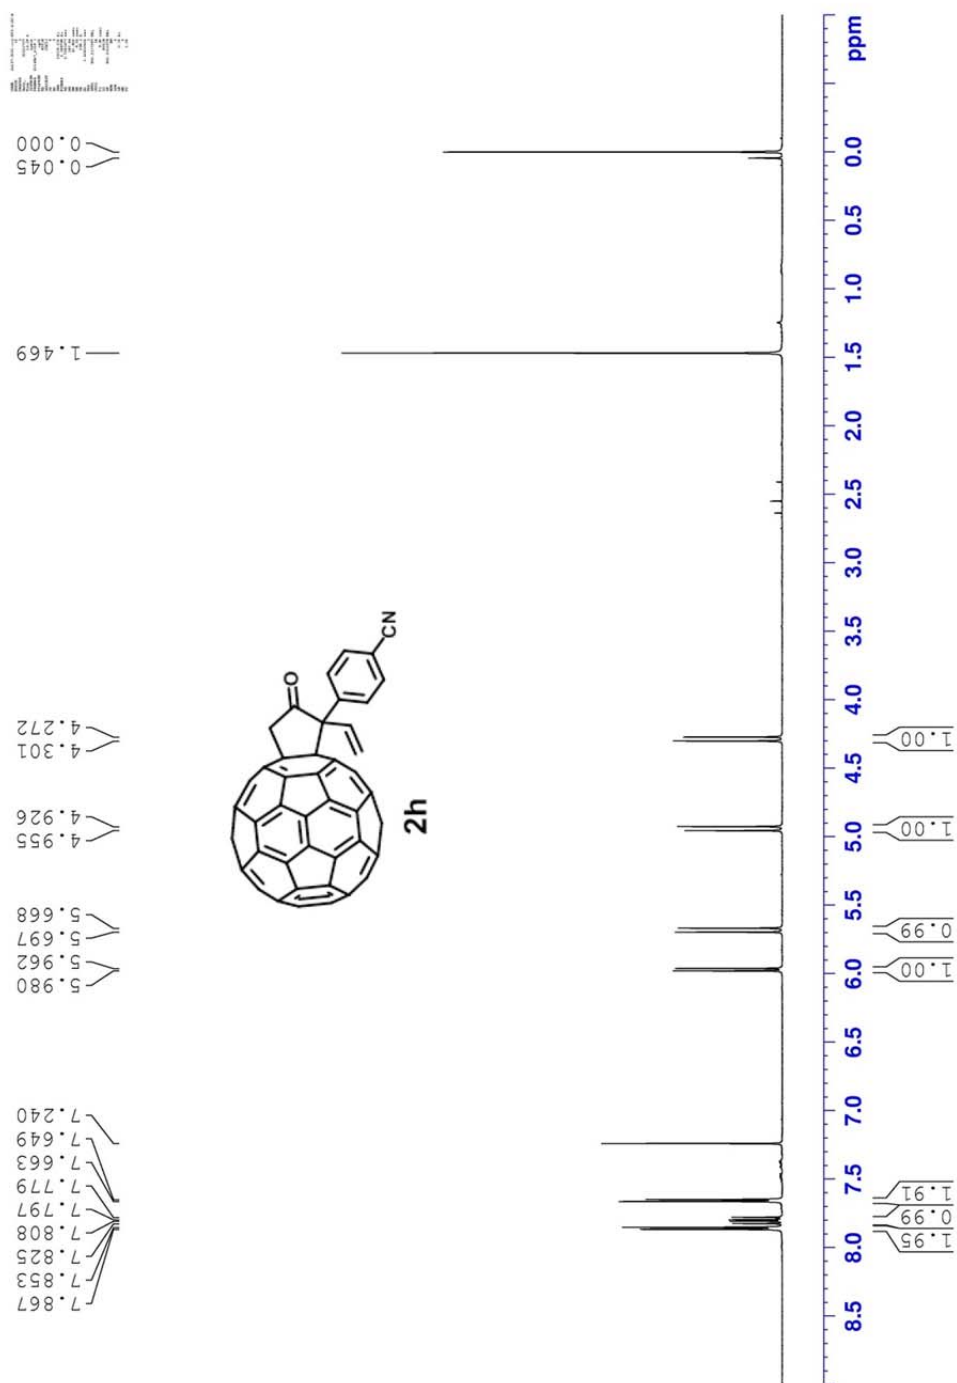

**$^{13}\text{C}$  NMR (150 MHz,  $\text{CDCl}_3/\text{CS}_2$ ) of compound 2h**

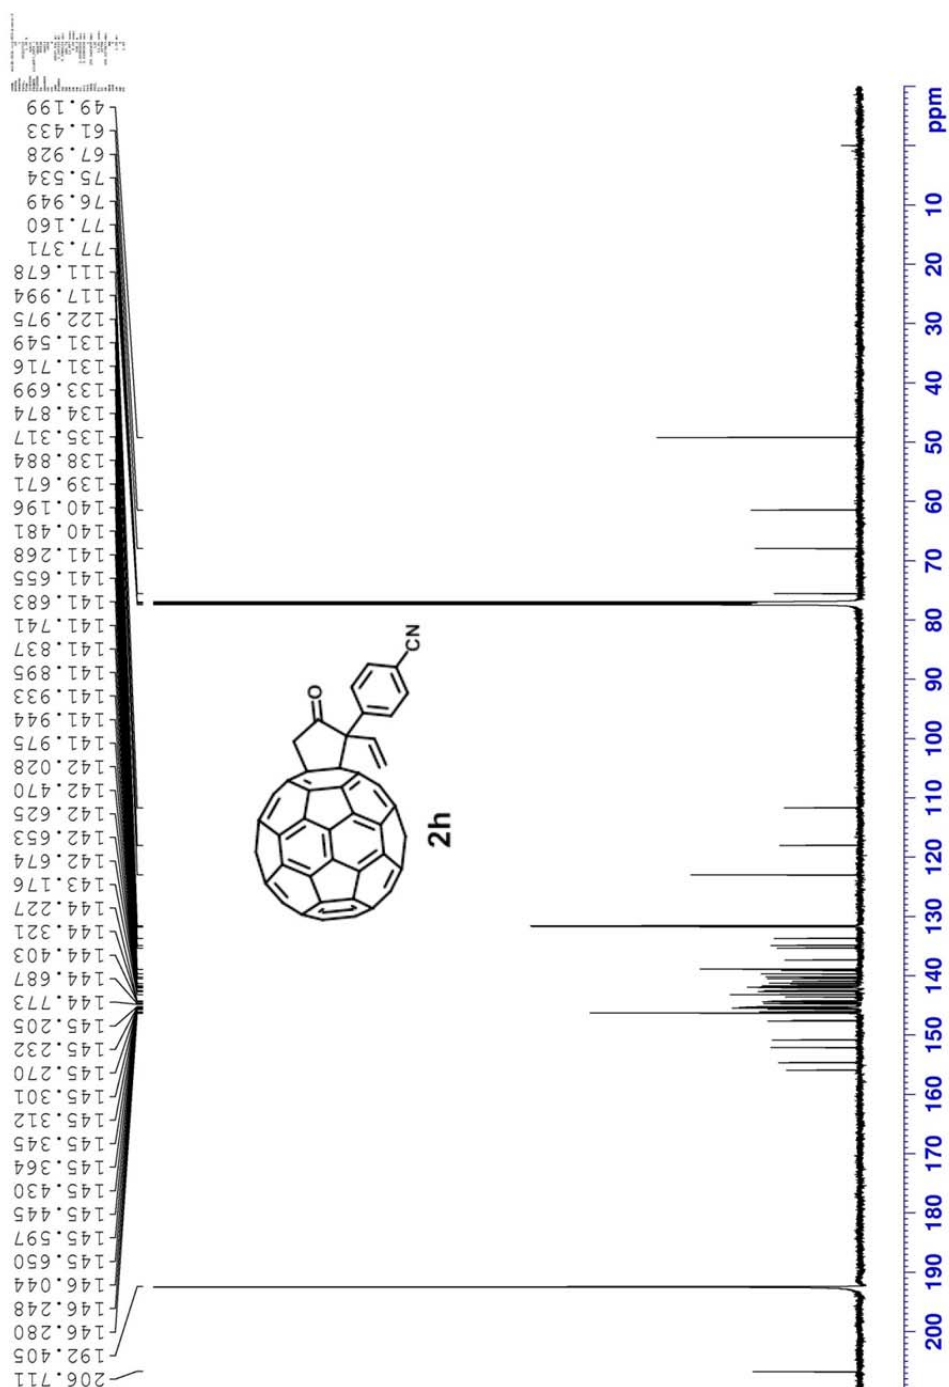



**<sup>1</sup>H NMR (600 MHz, CDCl<sub>3</sub>/CS<sub>2</sub>) of compound 2i**

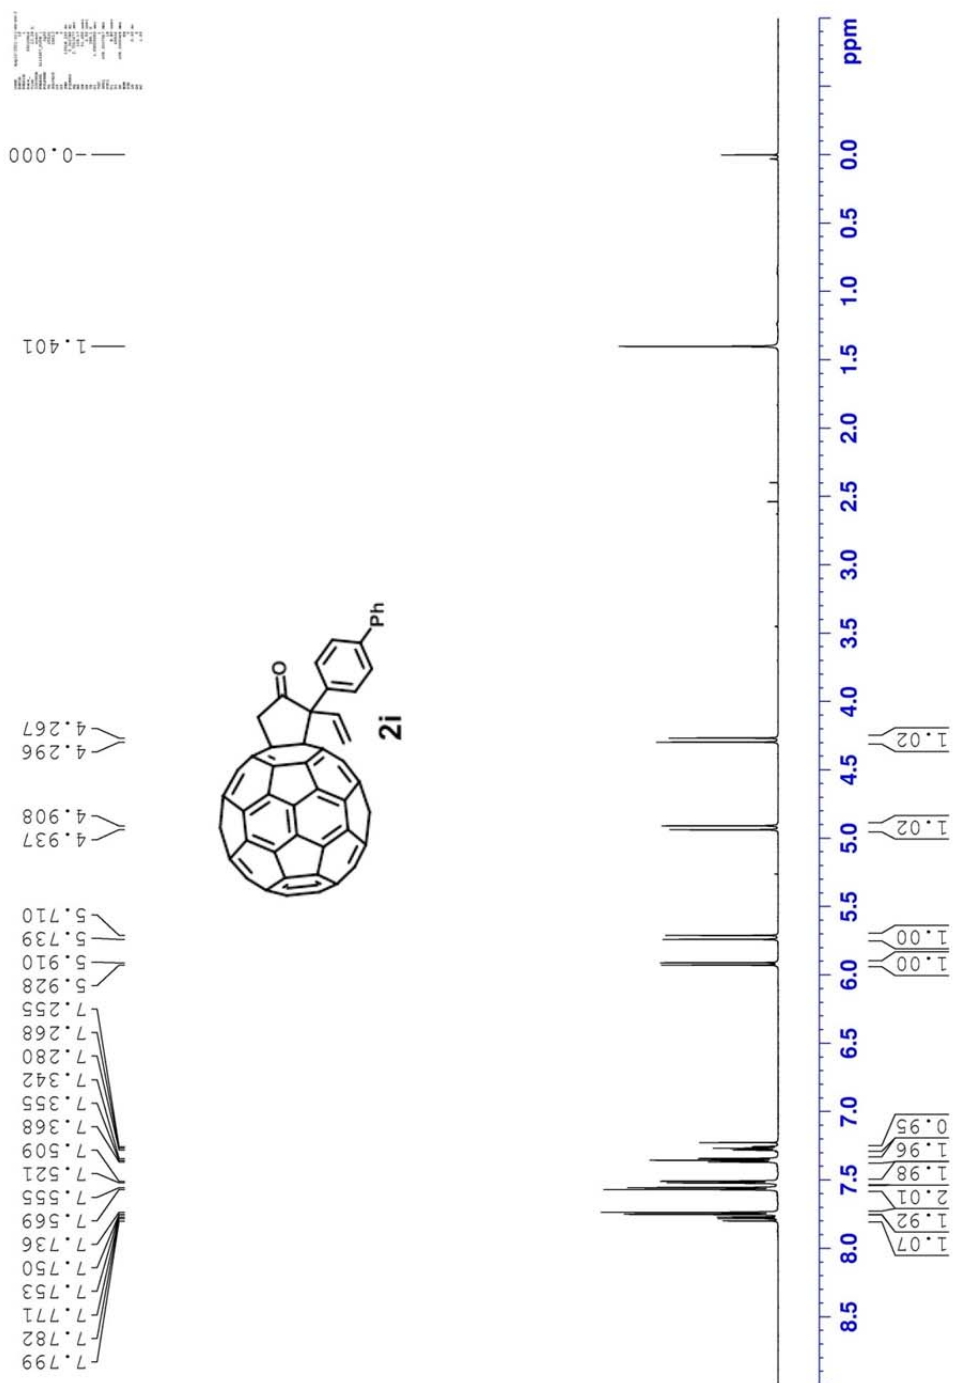

**$^{13}\text{C}$  NMR (150 MHz,  $\text{CDCl}_3/\text{CS}_2$ ) of compound 2i**

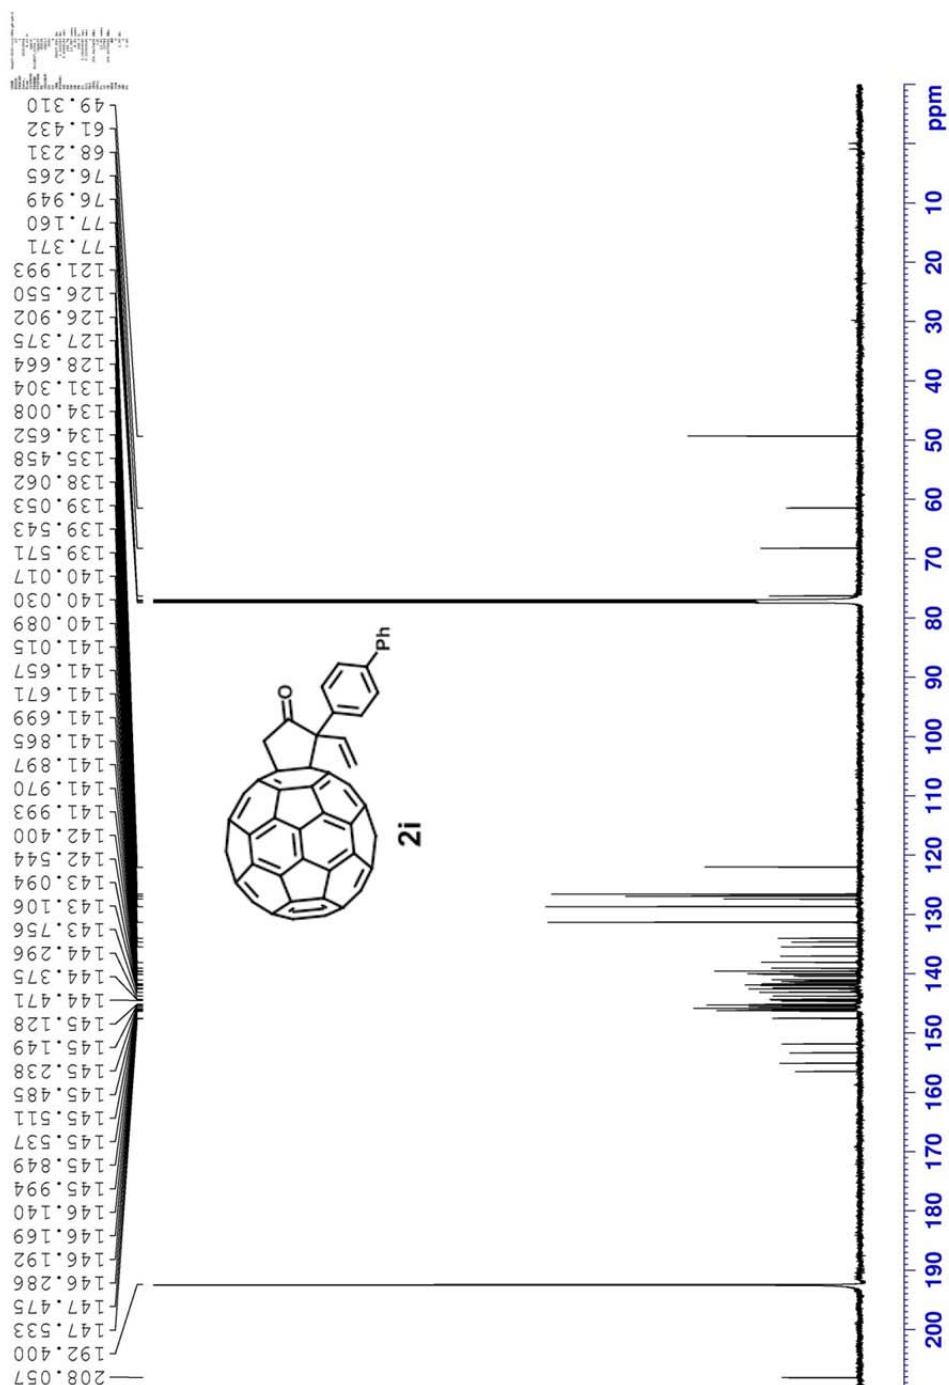

# Expanded $^{13}\text{C}$ NMR (150 MHz, $\text{CDCl}_3/\text{CS}_2$ ) of compound 2i

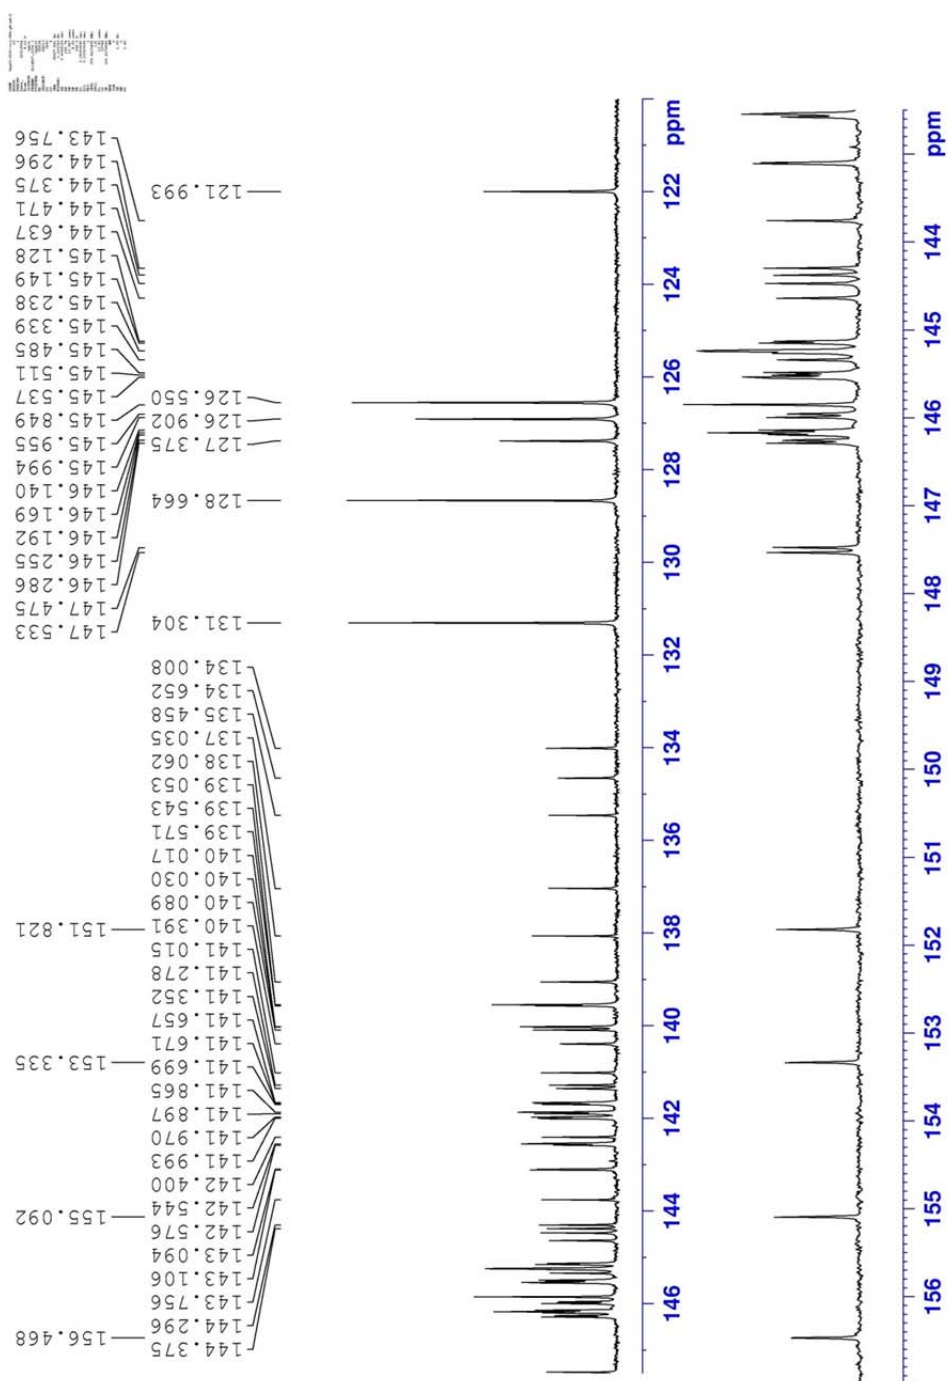

**$^1\text{H}$  NMR (400 MHz,  $\text{CDCl}_3/\text{CS}_2$ ) of compound 2j**

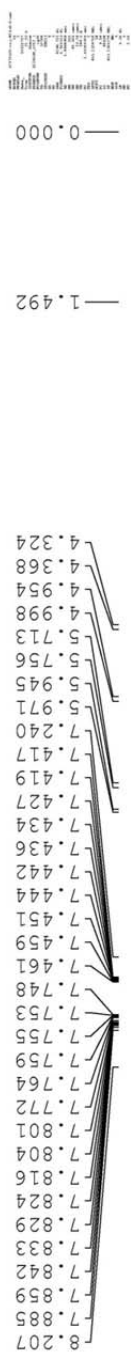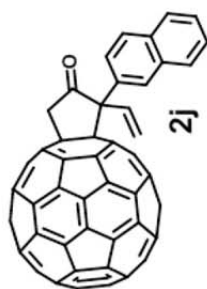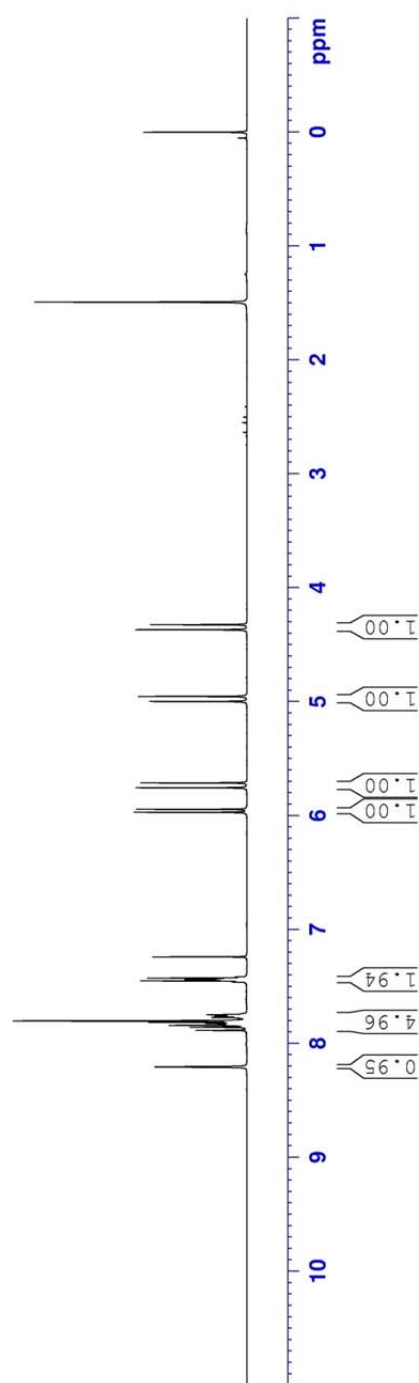

**$^{13}\text{C}$  NMR (150 MHz,  $\text{CDCl}_3/\text{CS}_2$ ) of compound 2j**

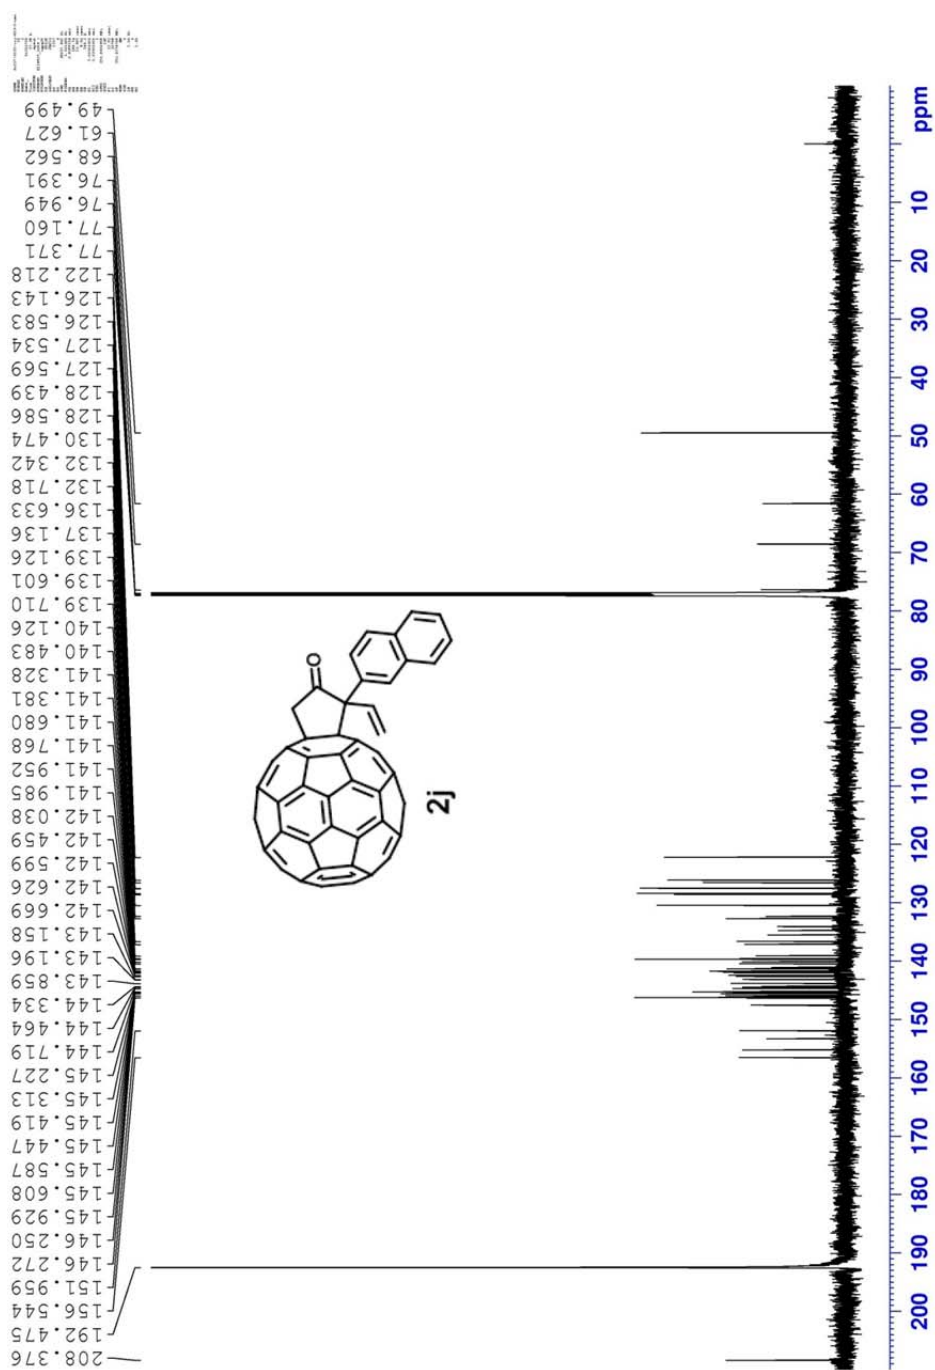

# Expanded $^{13}\text{C}$ NMR (150 MHz, $\text{CDCl}_3/\text{CS}_2$ ) of compound 2j

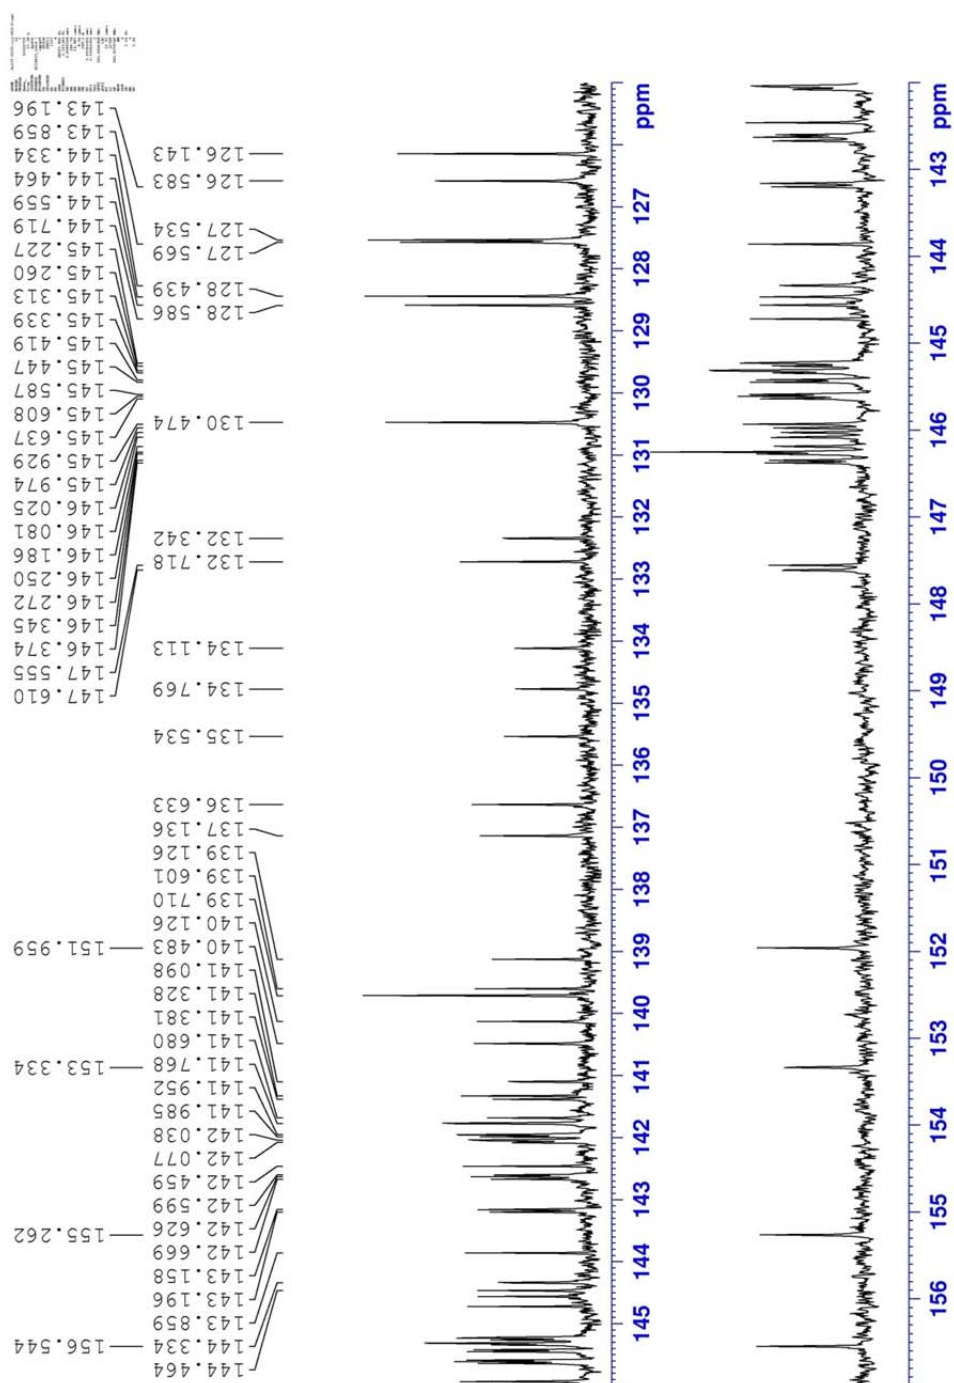

**<sup>1</sup>H NMR (400 MHz, CDCl<sub>3</sub>/CS<sub>2</sub>) of compound 2k**

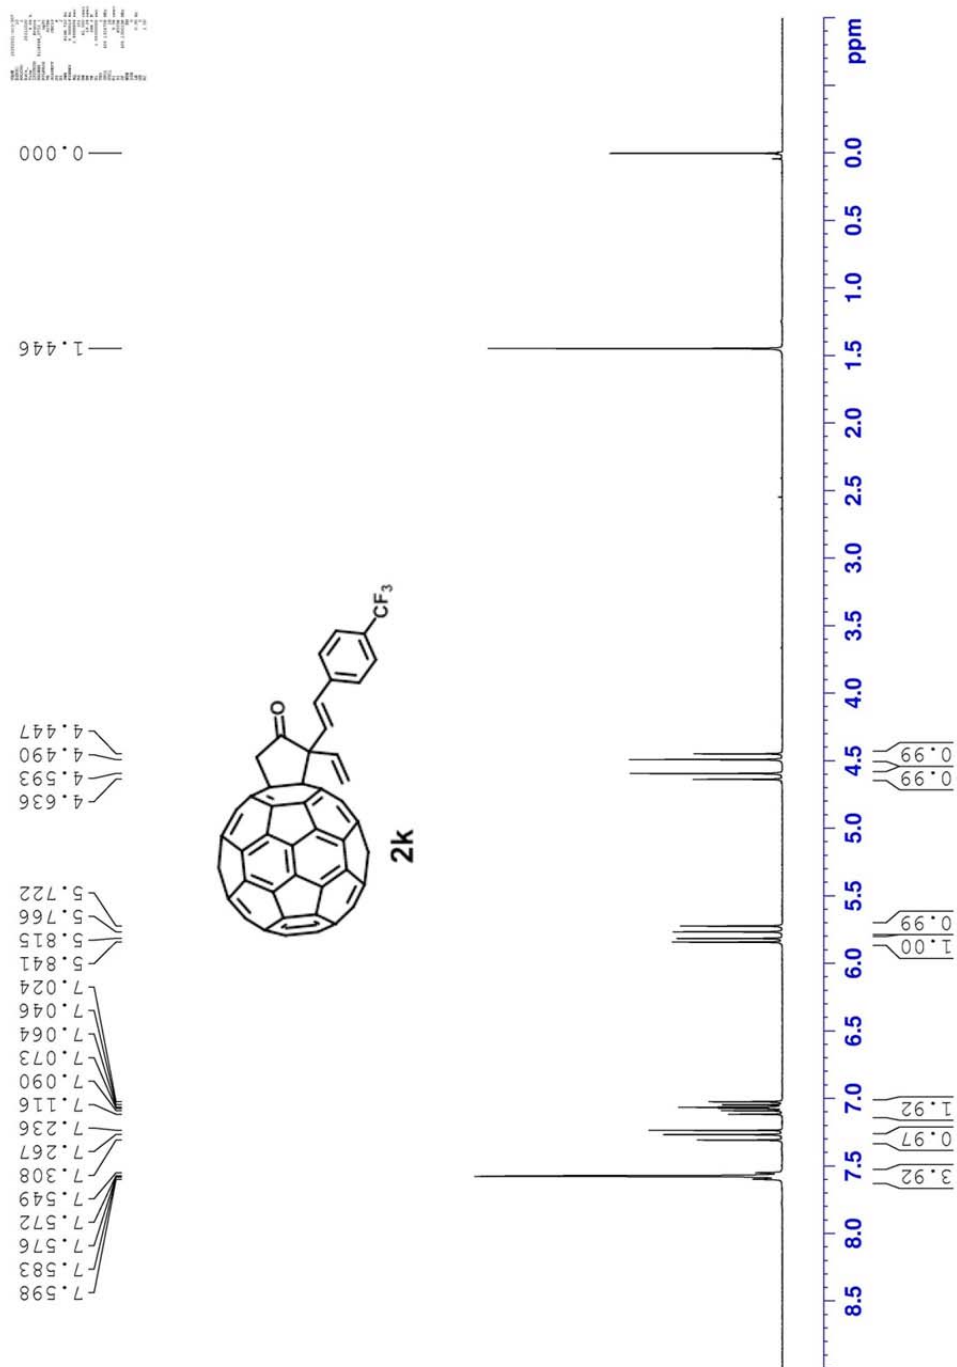

**$^{13}\text{C}$  NMR (150 MHz,  $\text{CDCl}_3/\text{CS}_2$ ) of compound 2k**

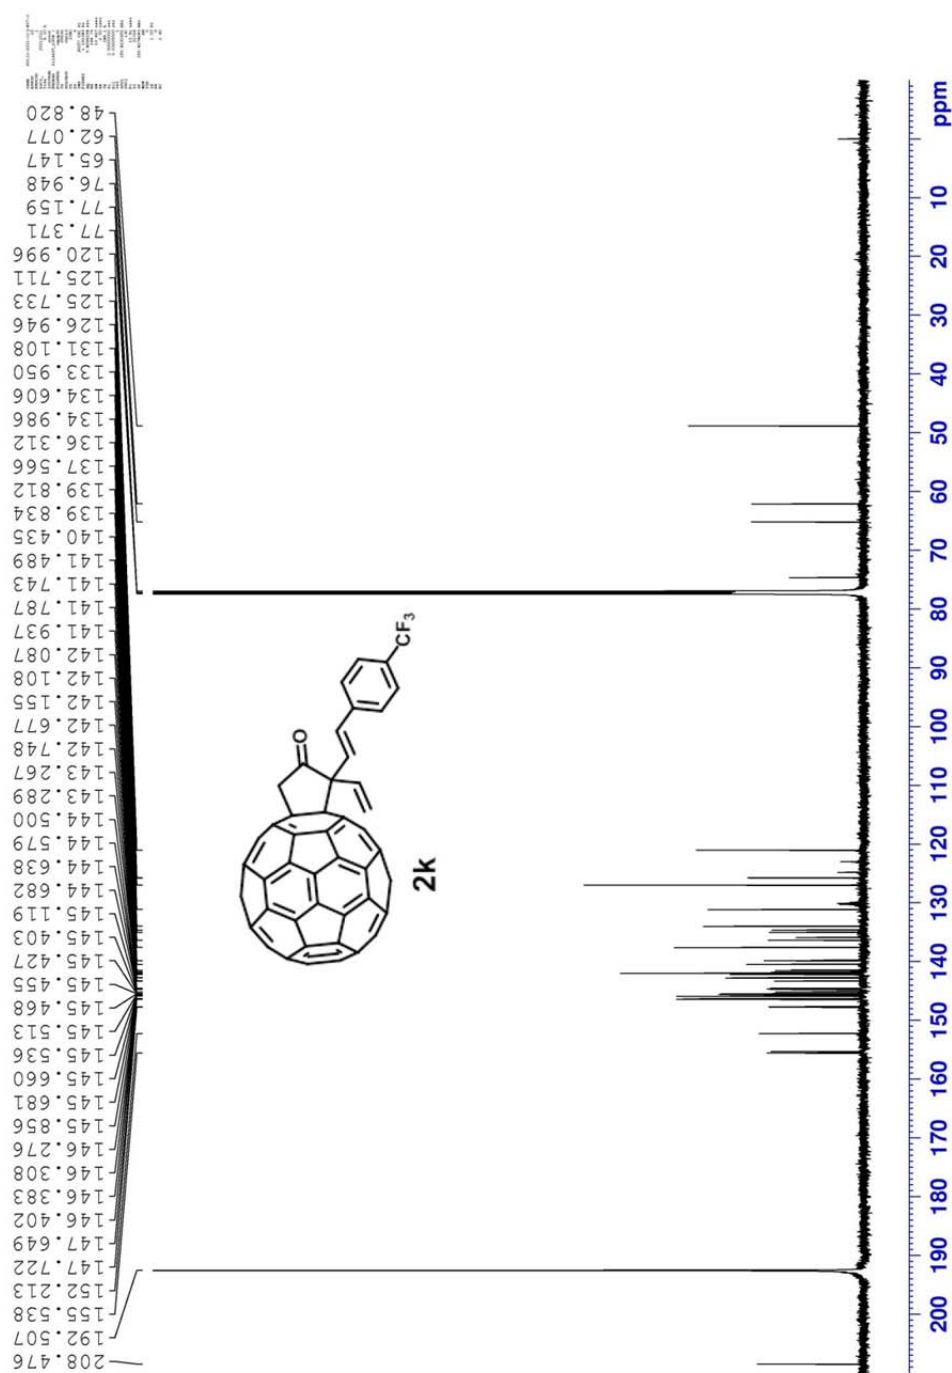

# Expanded $^{13}\text{C}$ NMR (150 MHz, $\text{CDCl}_3/\text{CS}_2$ ) of compound 2k

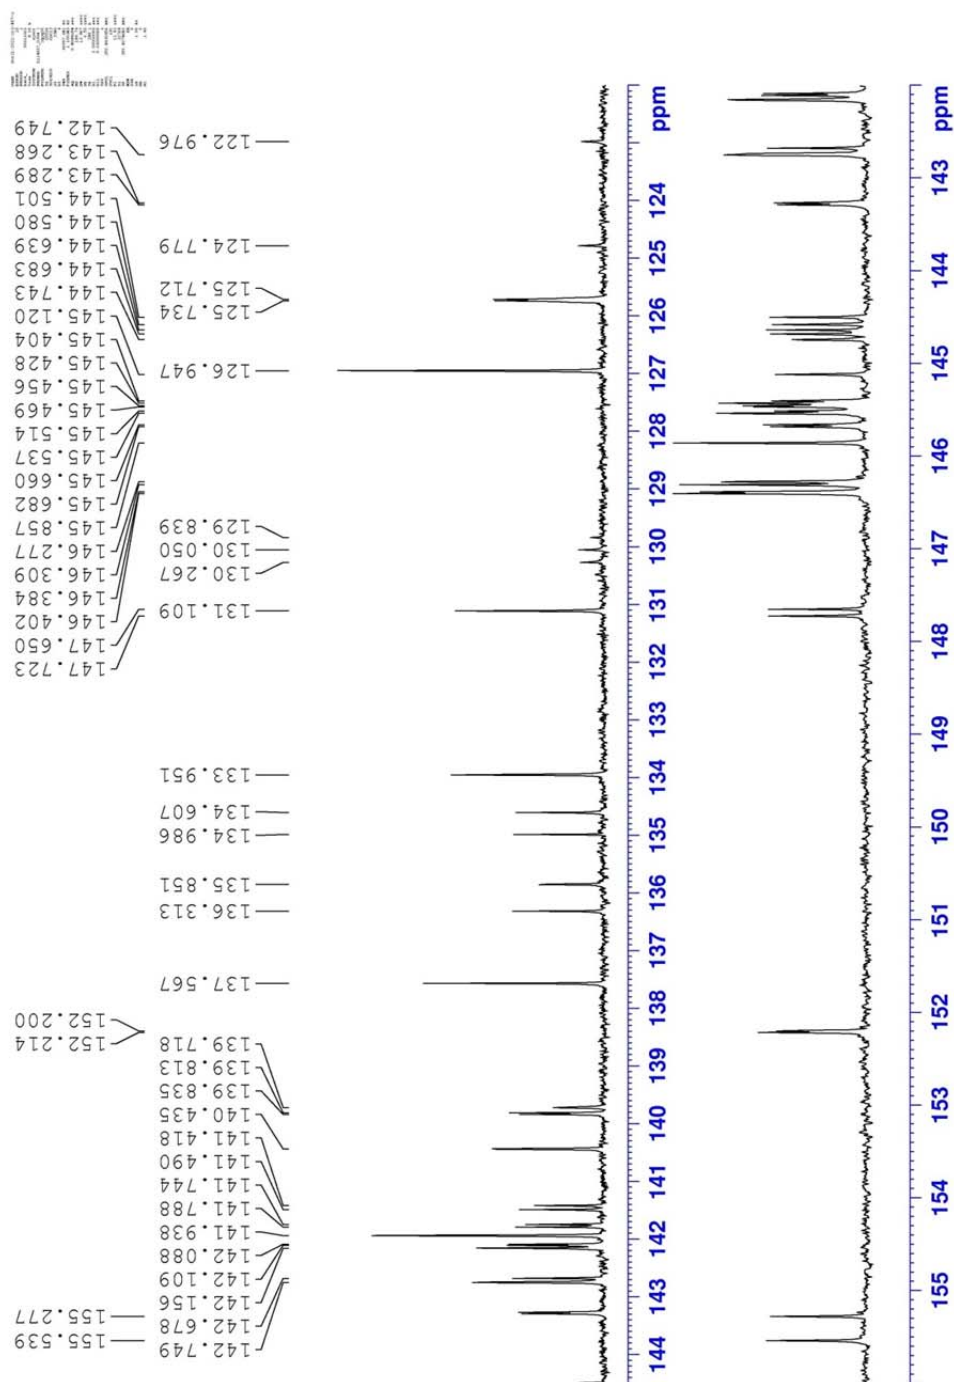

<sup>19</sup>F NMR (565 MHz, CDCl<sub>3</sub>/CS<sub>2</sub>) of compound 2k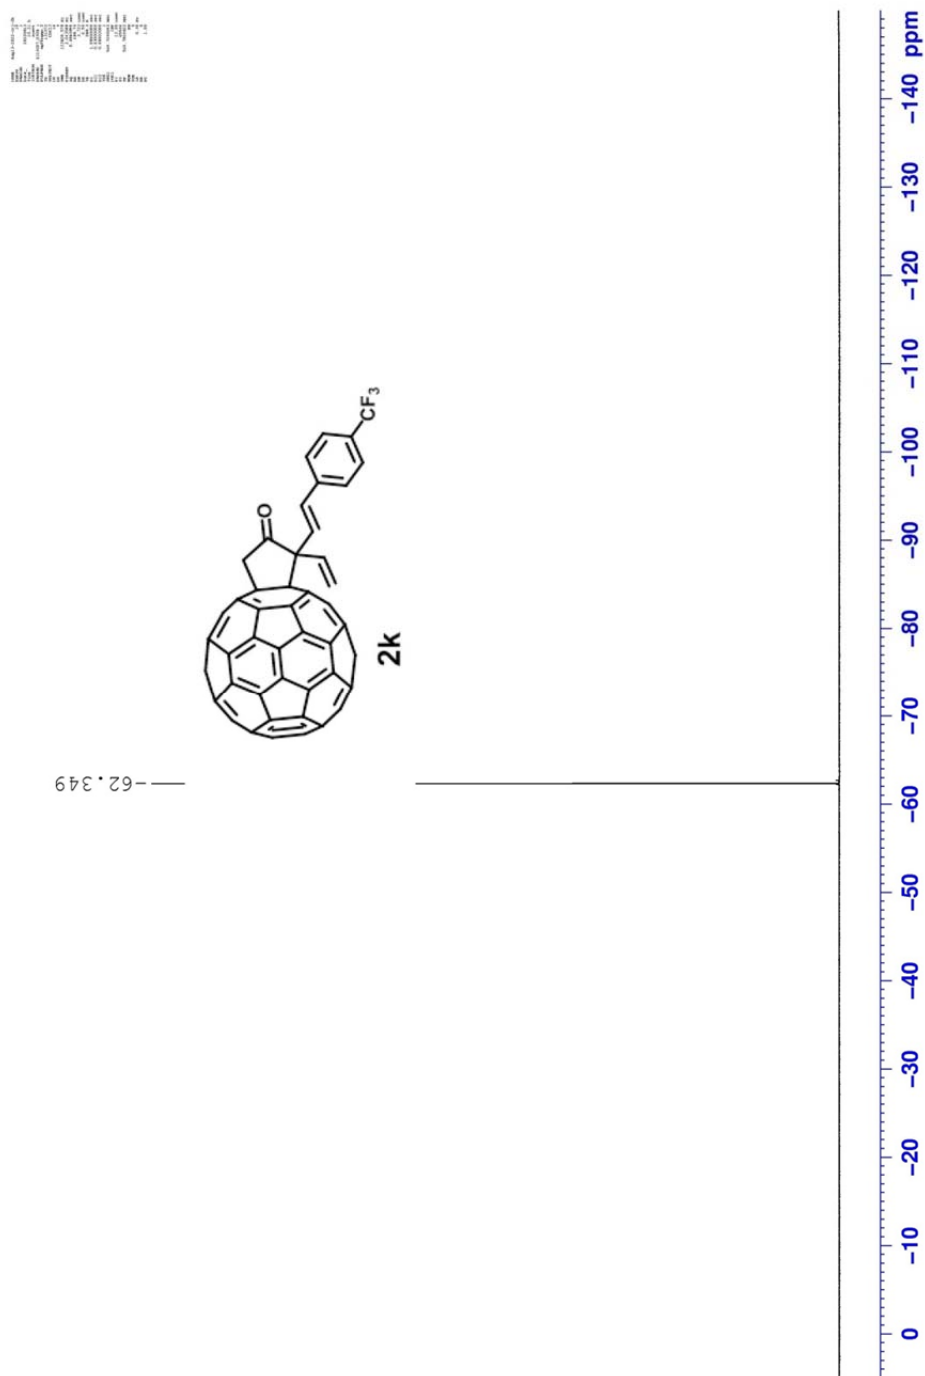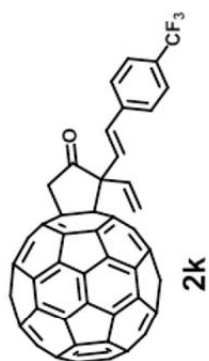

<sup>1</sup>H NMR (400 MHz, CDCl<sub>3</sub>/CS<sub>2</sub>) of compound 2m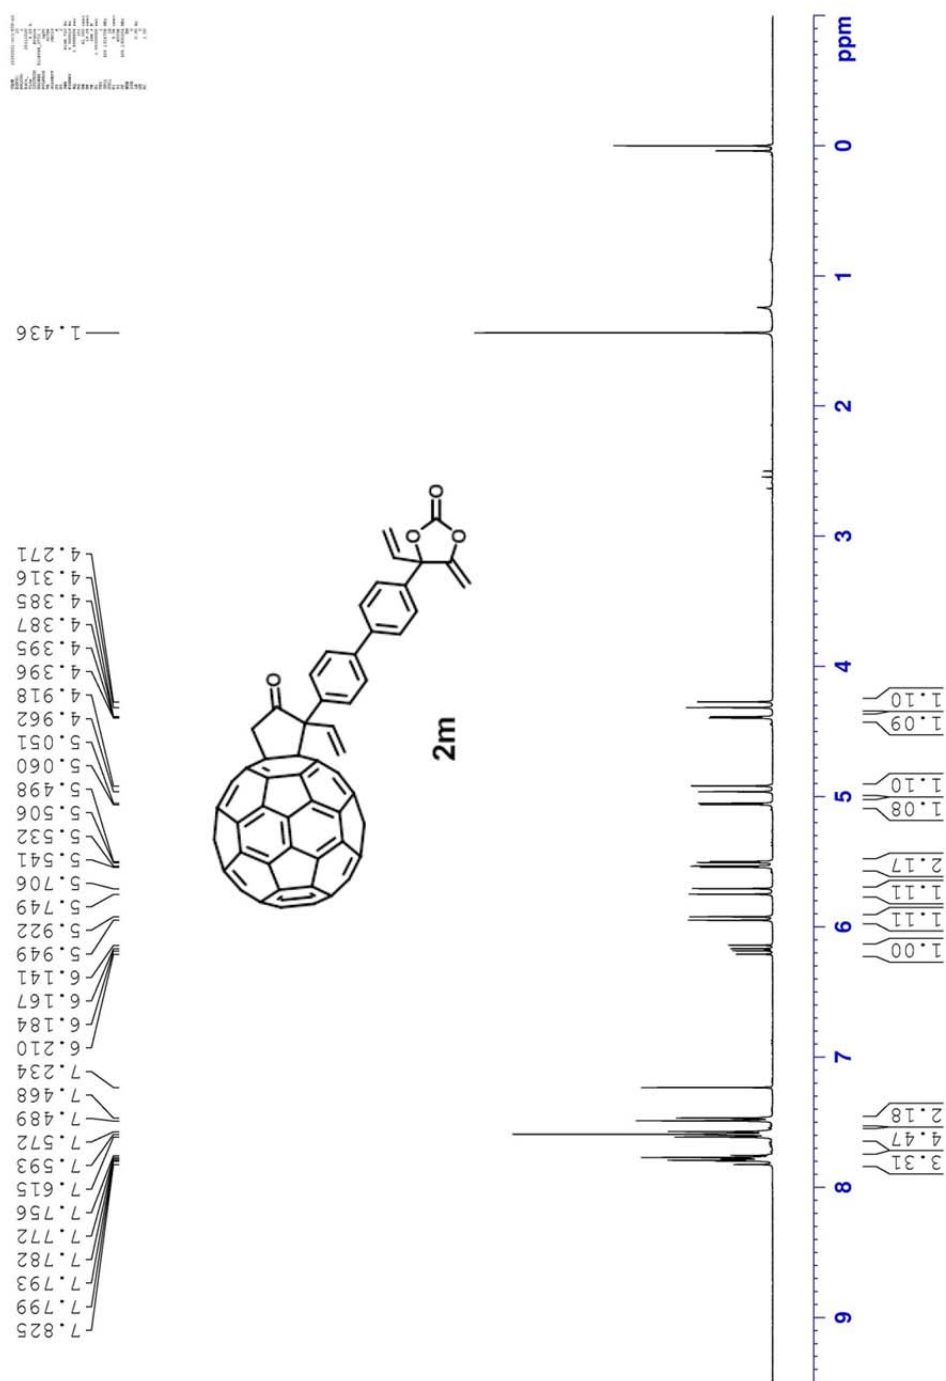

**$^{13}\text{C}$  NMR (150 MHz,  $\text{CDCl}_3/\text{CS}_2$ ) of compound 2m**

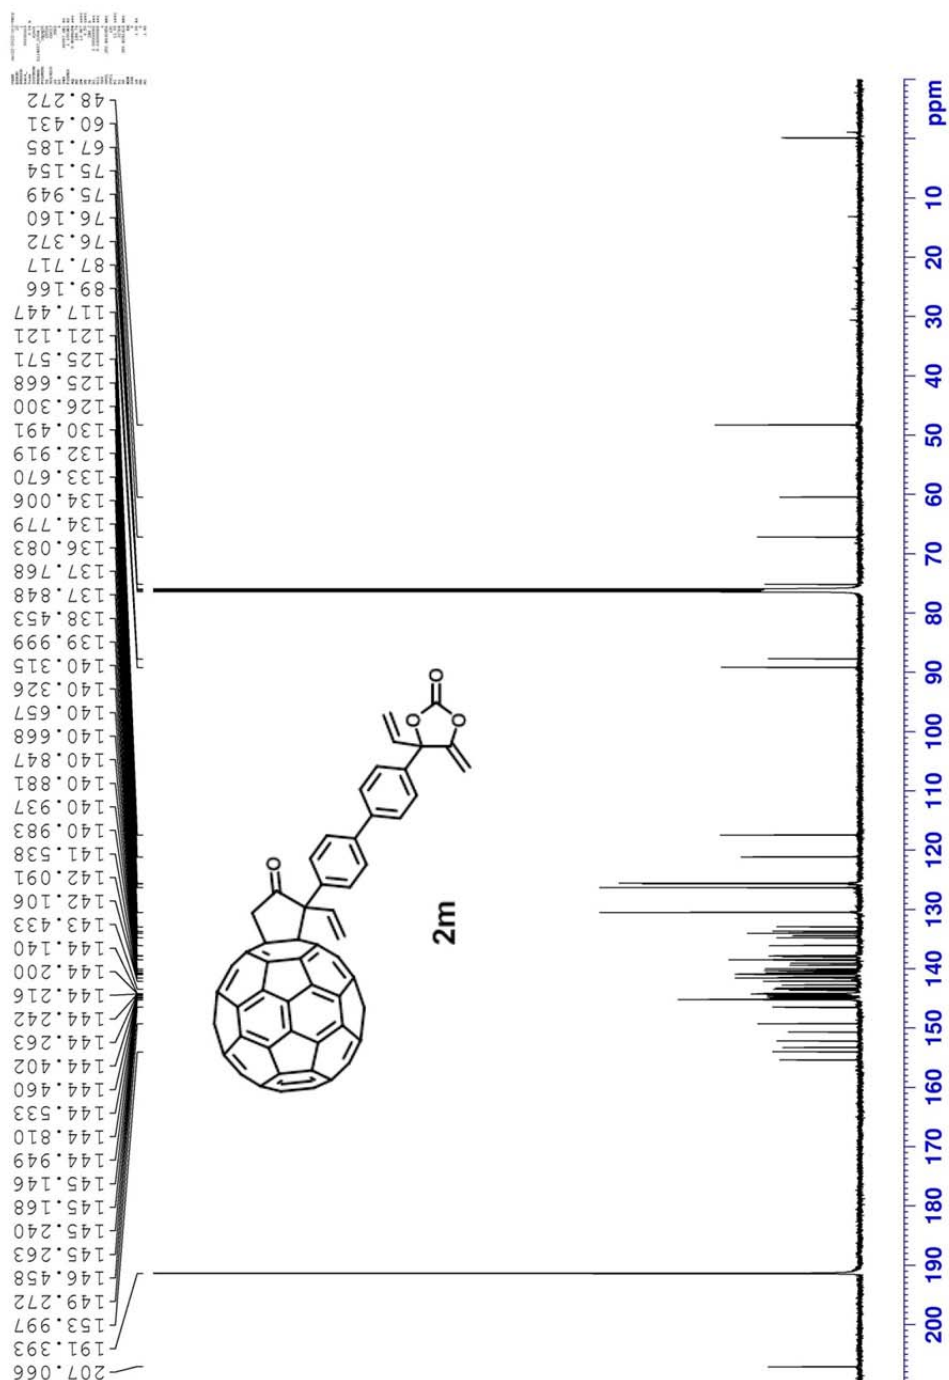

Expanded  $^{13}\text{C}$  NMR (150 MHz,  $\text{CDCl}_3/\text{CS}_2$ ) of compound 2m

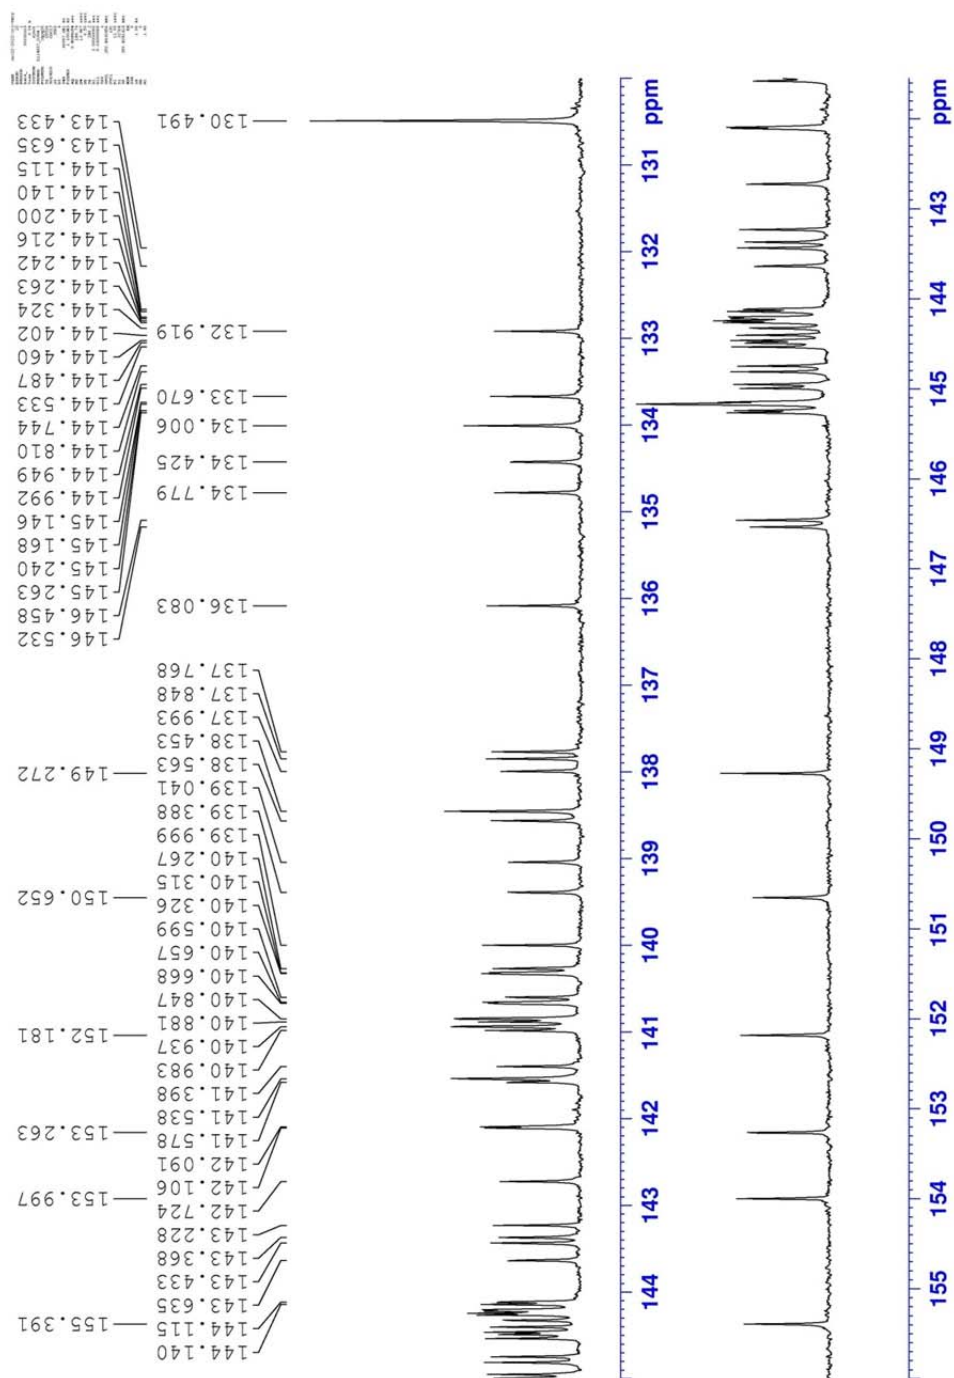

**<sup>1</sup>H NMR (400 MHz, DMSO-*d*<sub>6</sub>/CS<sub>2</sub>) of compound 2m'**

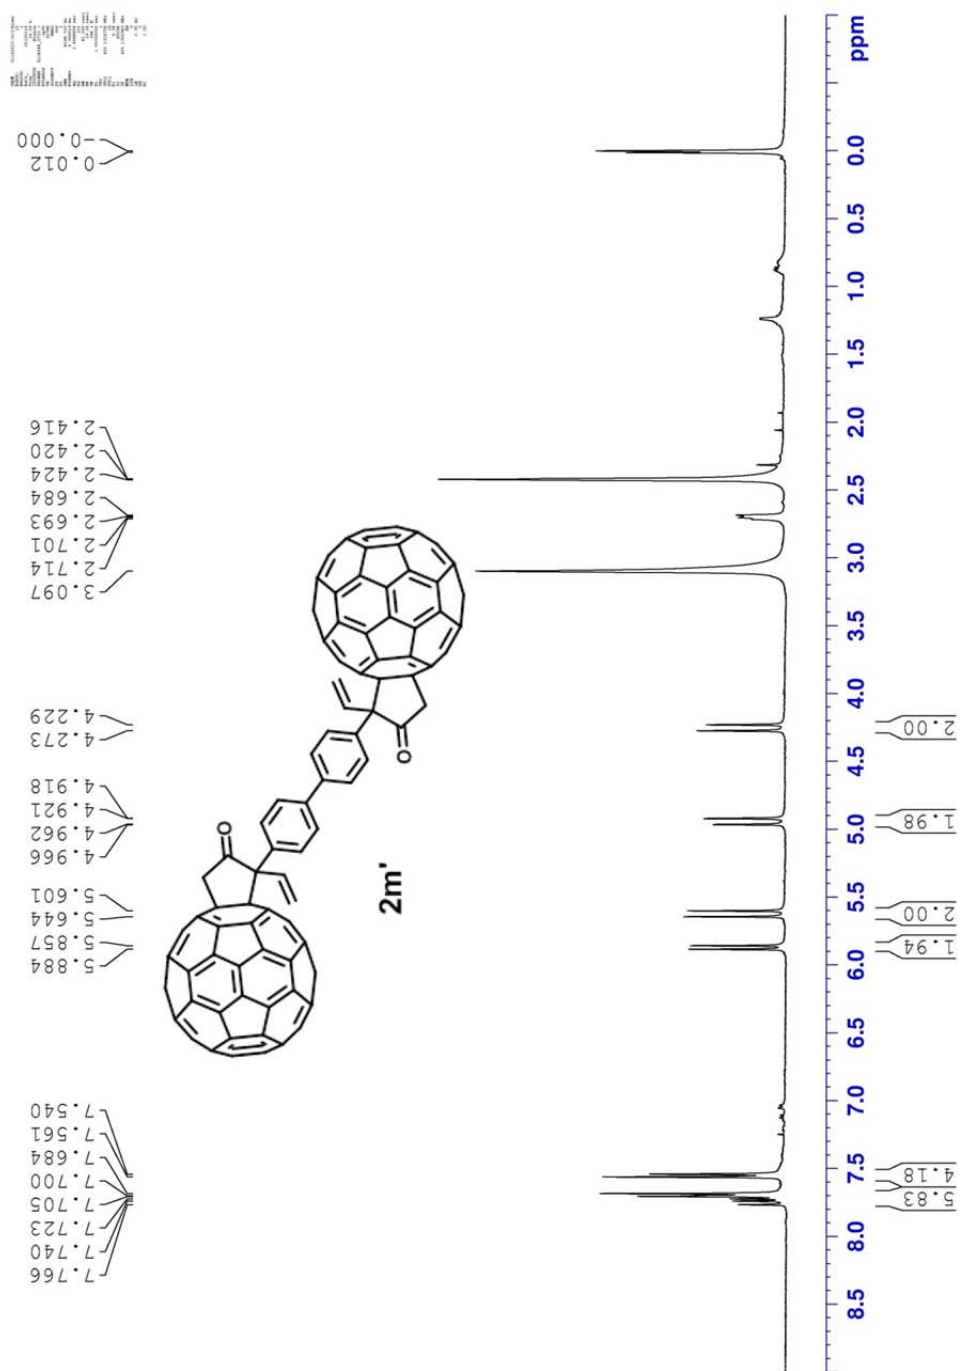

**$^1\text{H}$  NMR (400 MHz,  $\text{CDCl}_3/\text{CS}_2$ ) of compound 5a**

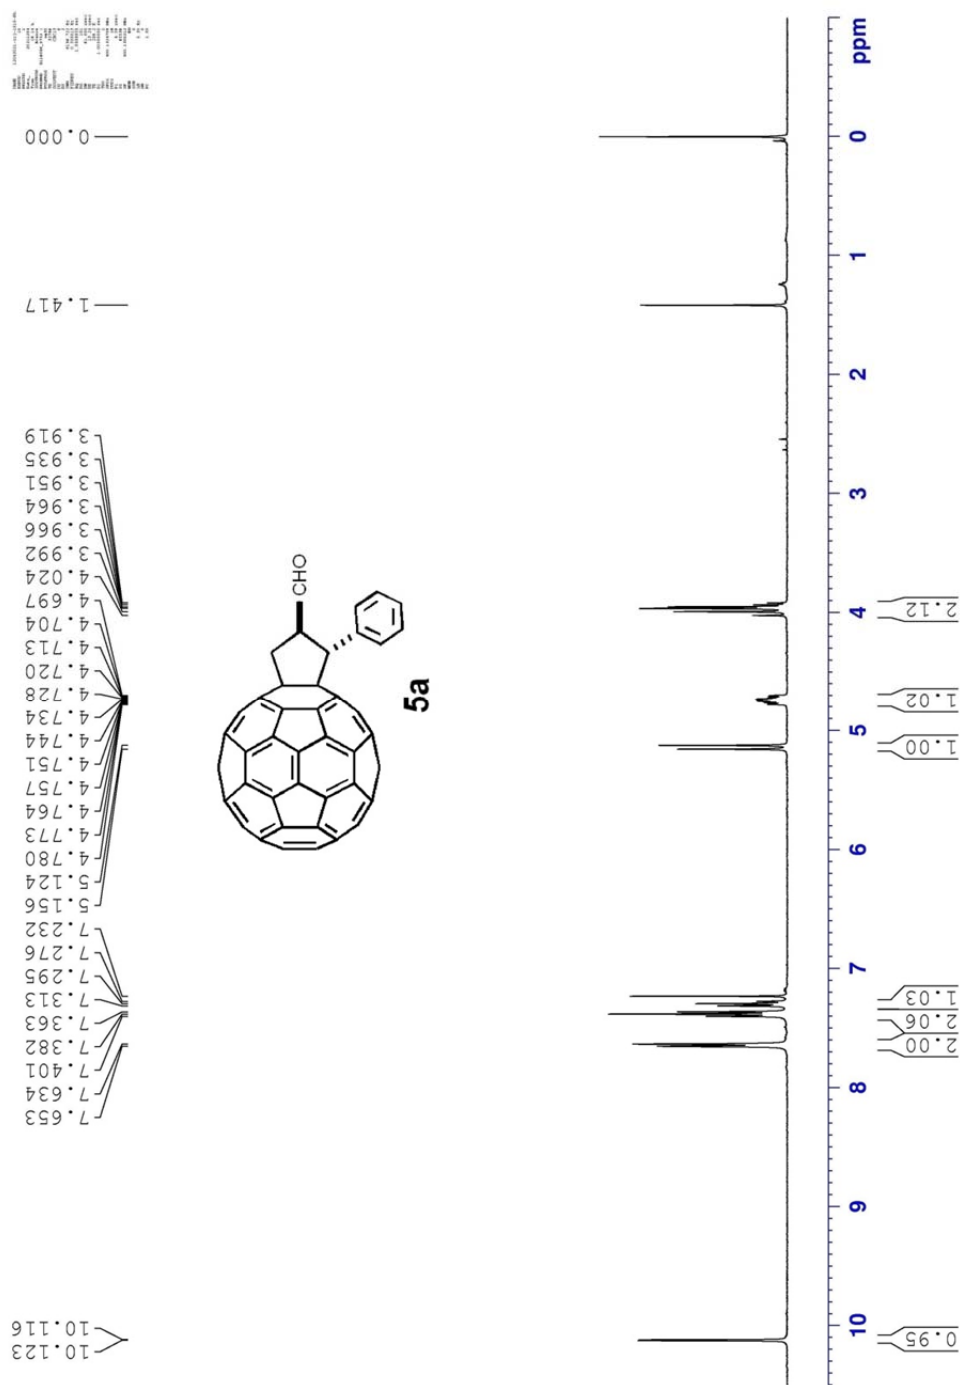

**$^1\text{H}$  NMR (400 MHz,  $\text{DMSO}/\text{CS}_2$ ) of compound 5a**

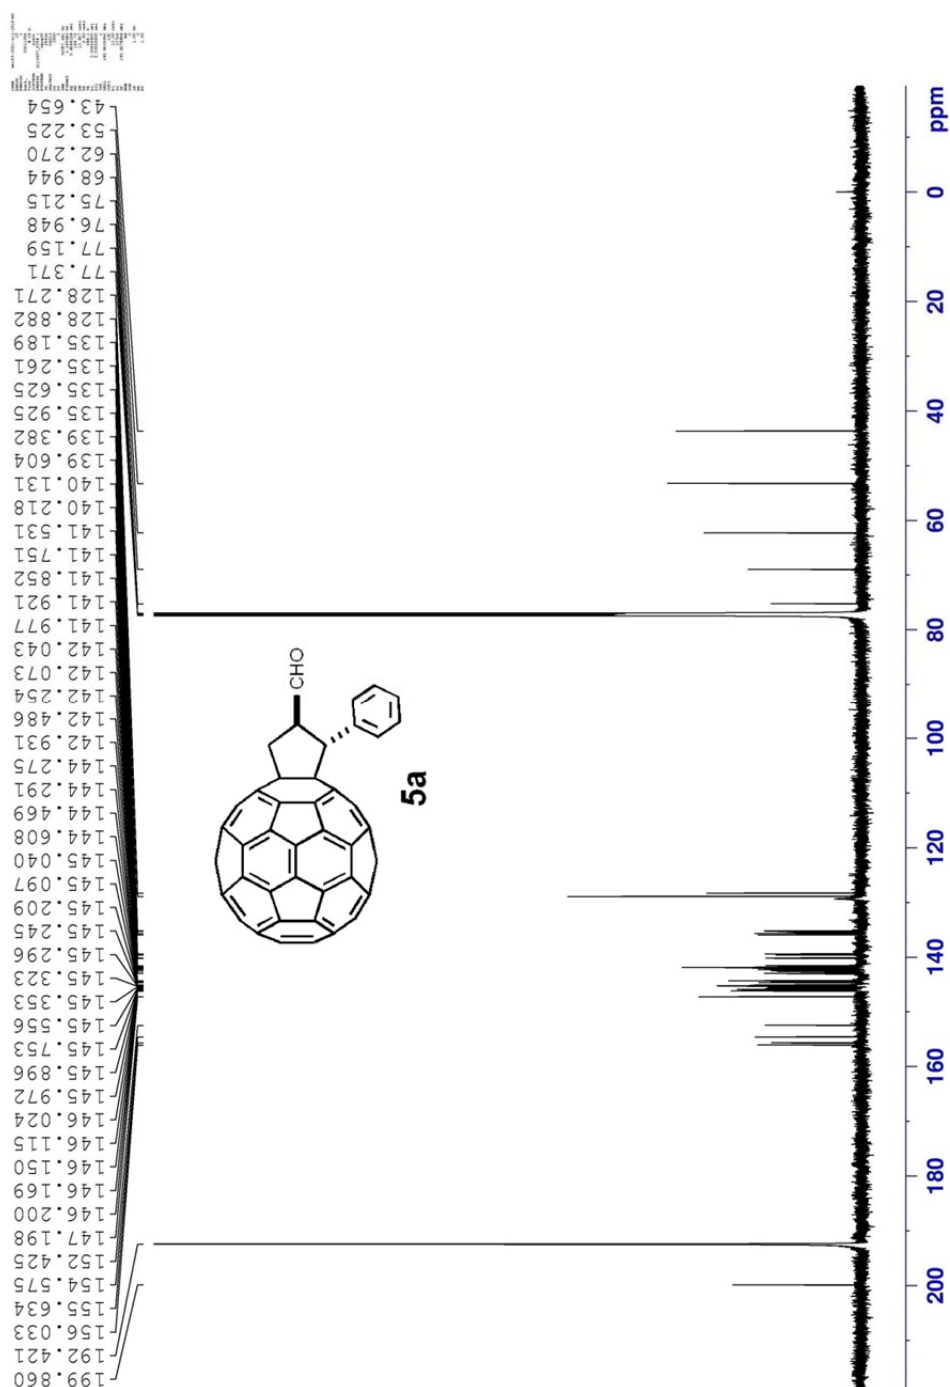

**Expanded  $^{13}\text{C}$  NMR (150 MHz,  $\text{CDCl}_3/\text{CS}_2$ ) of compound 5a**

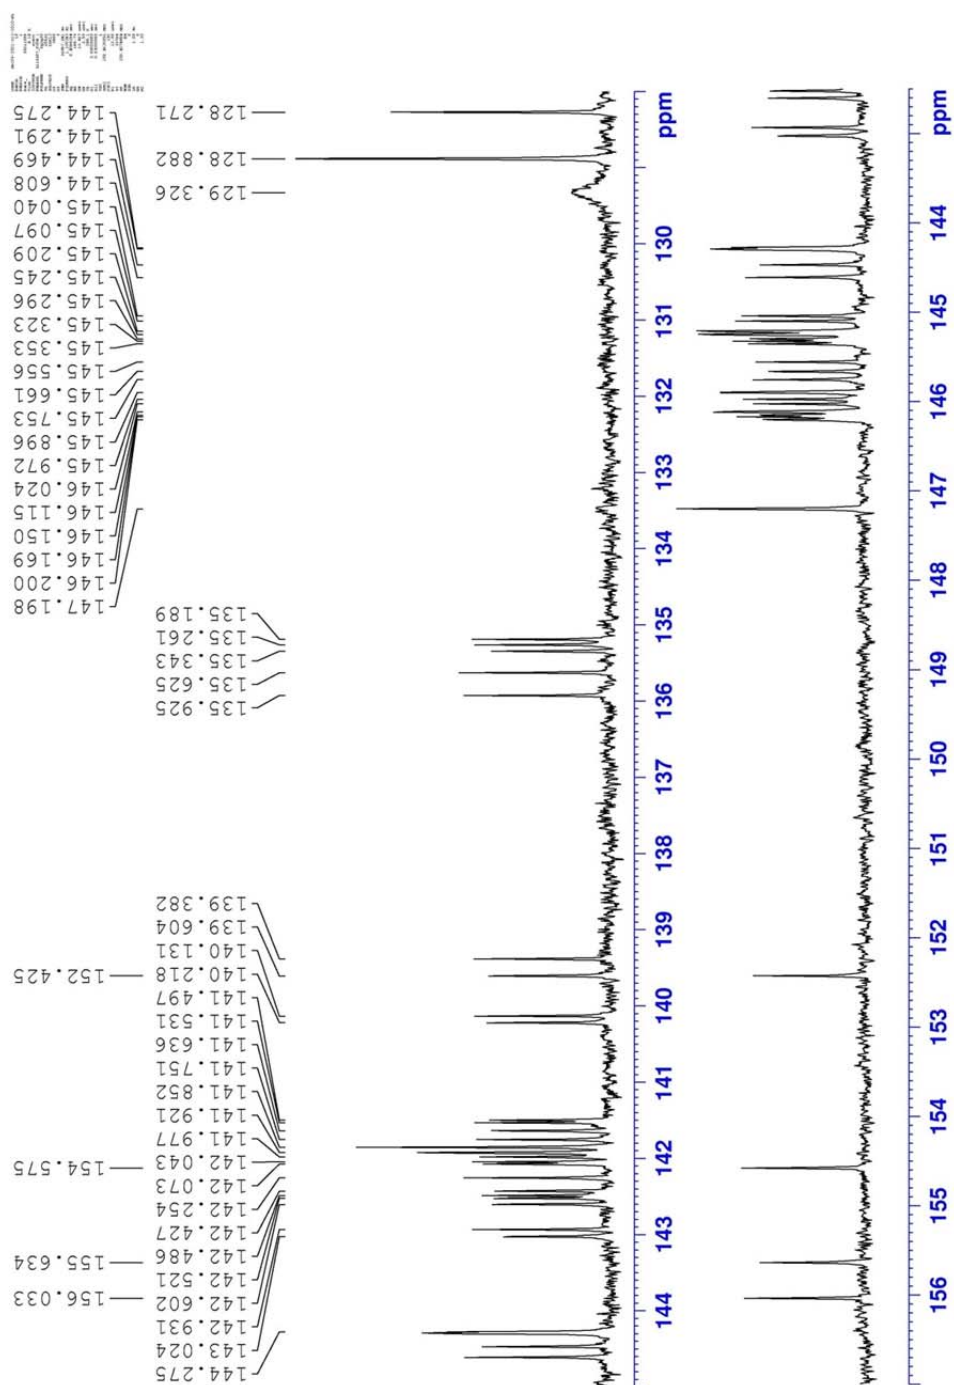

**<sup>1</sup>H NMR (400 MHz, CDCl<sub>3</sub>/CS<sub>2</sub>) of compound 5b**

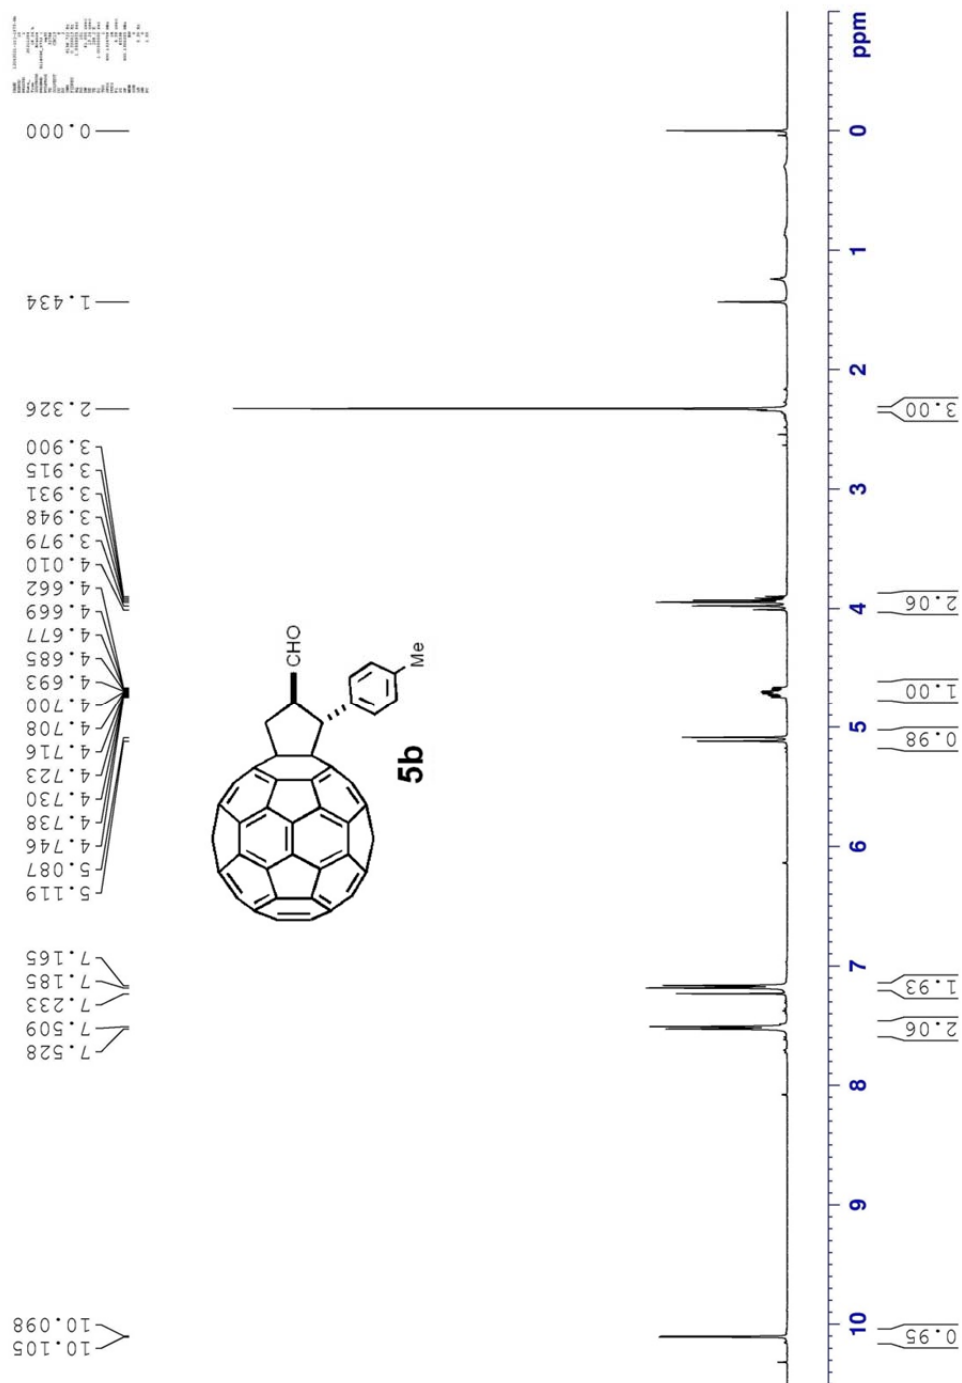

**$^{13}\text{C}$  NMR (150 MHz,  $\text{CDCl}_3/\text{CS}_2$ ) of compound **5b****

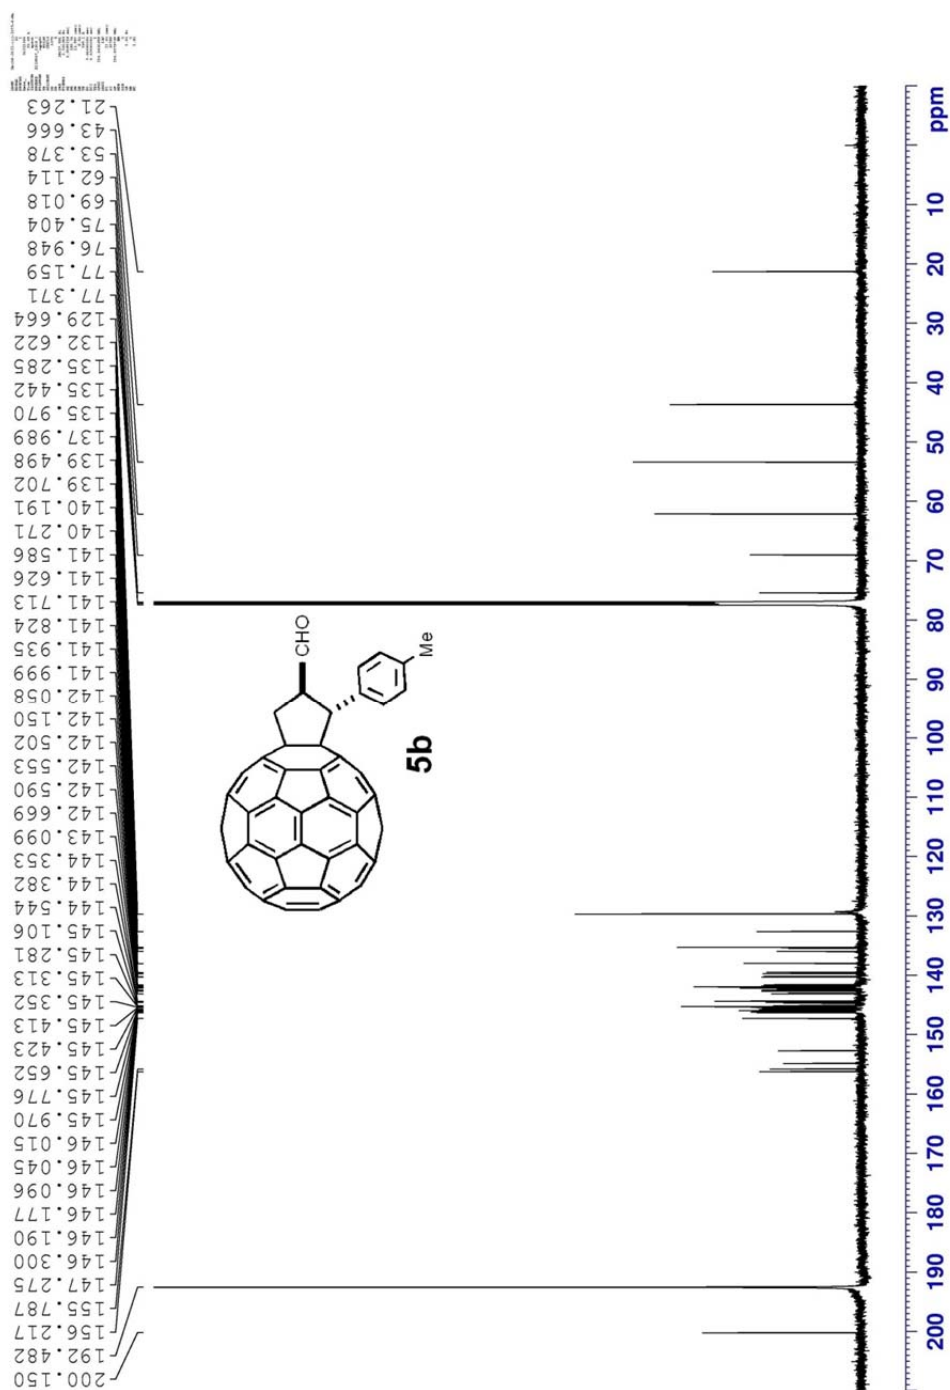

**Expanded  $^{13}\text{C}$  NMR (150 MHz,  $\text{CDCl}_3/\text{CS}_2$ ) of compound 5b**

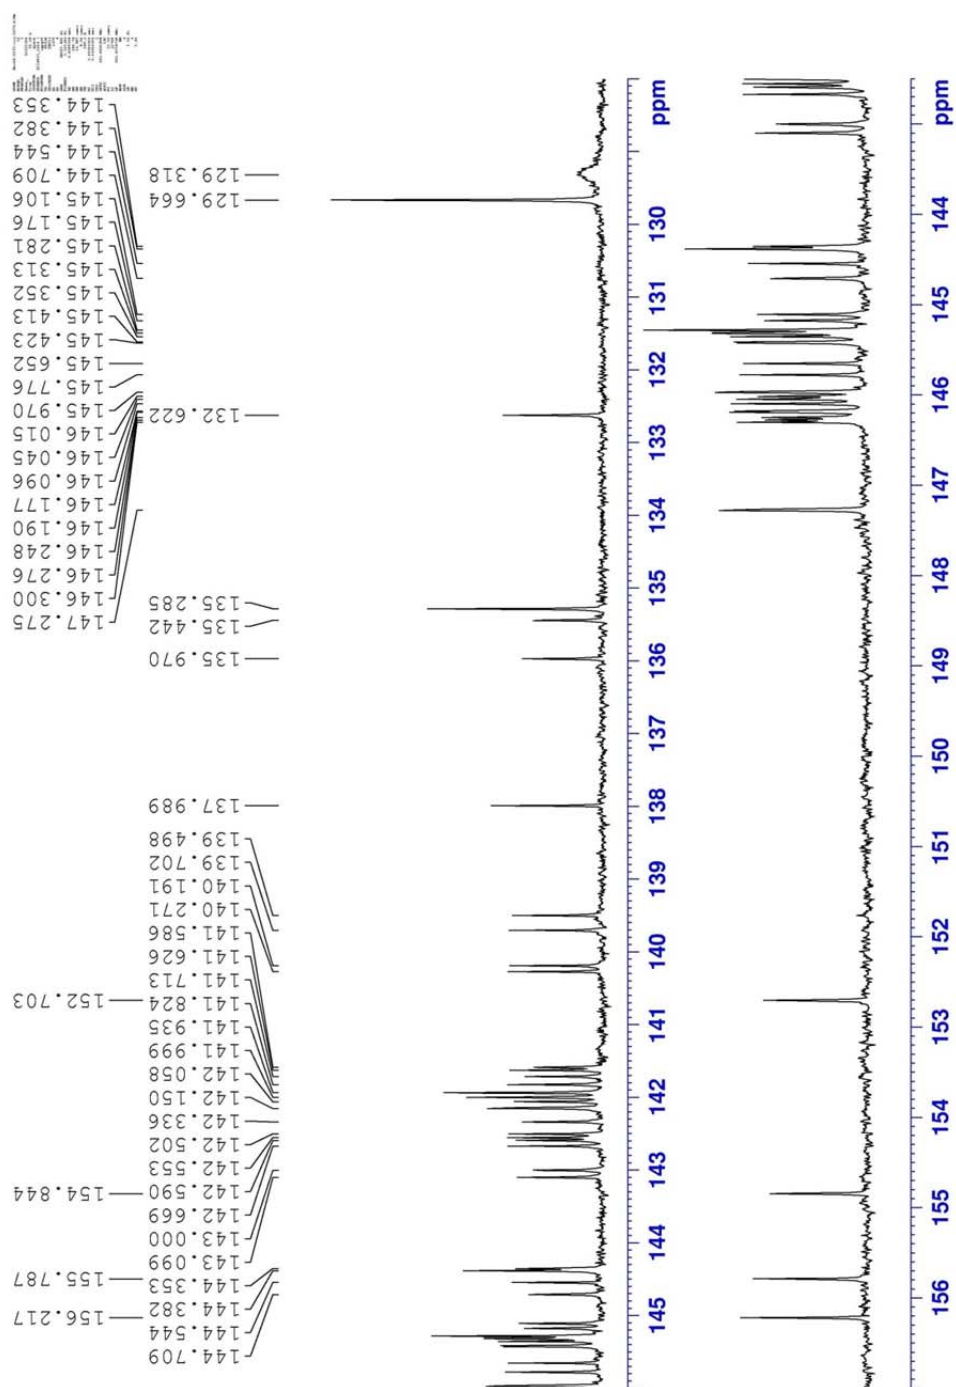

**<sup>1</sup>H NMR (400 MHz, CDCl<sub>3</sub>/CS<sub>2</sub>) of compound 5c**

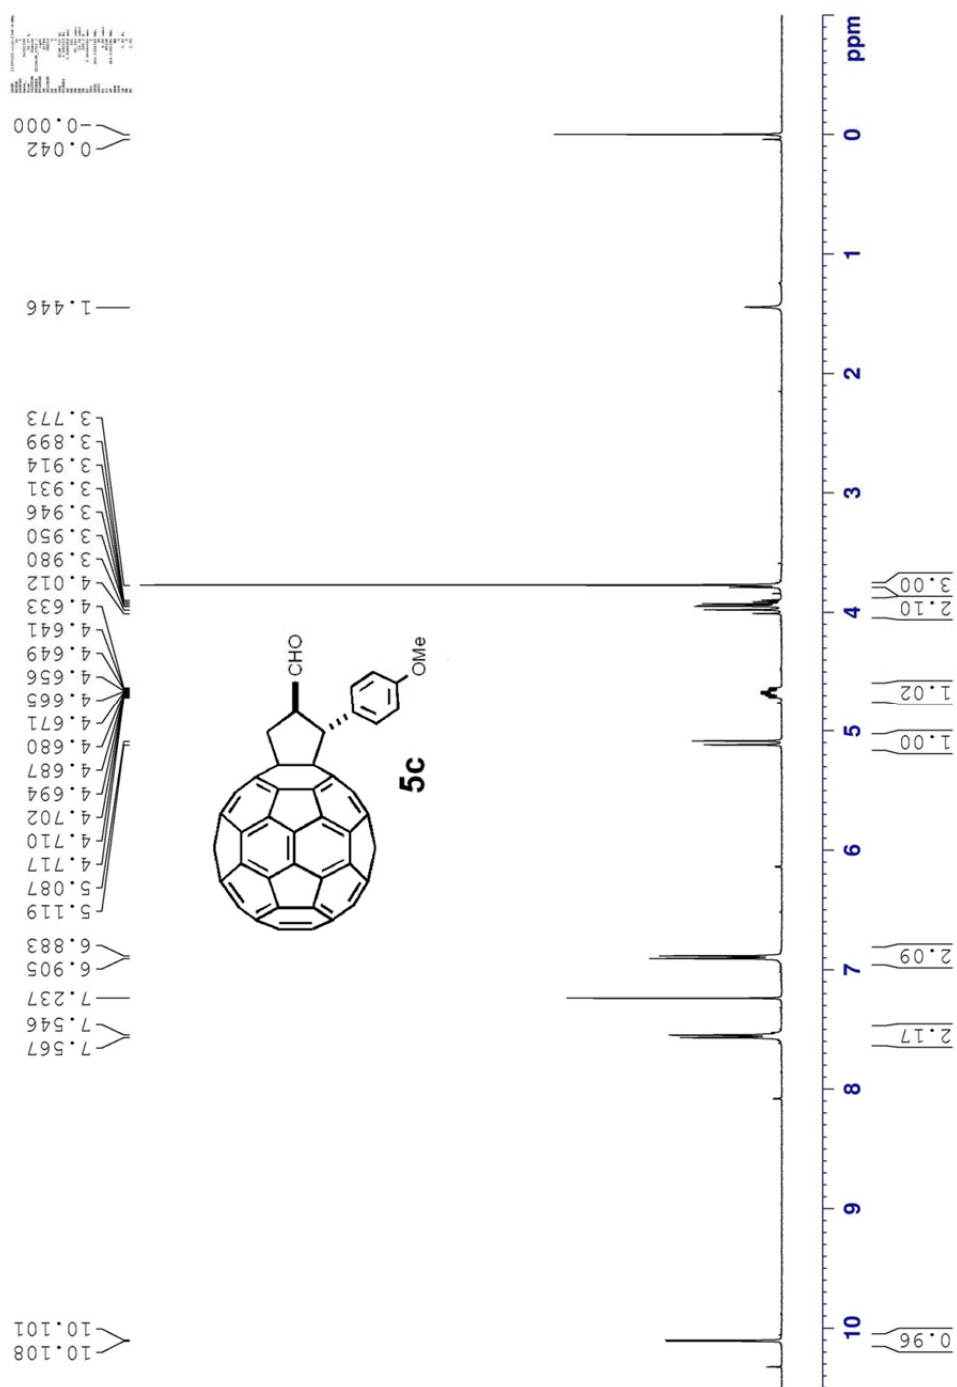

**$^{13}\text{C}$  NMR (150 MHz,  $\text{CDCl}_3/\text{CS}_2$ ) of compound **5c****

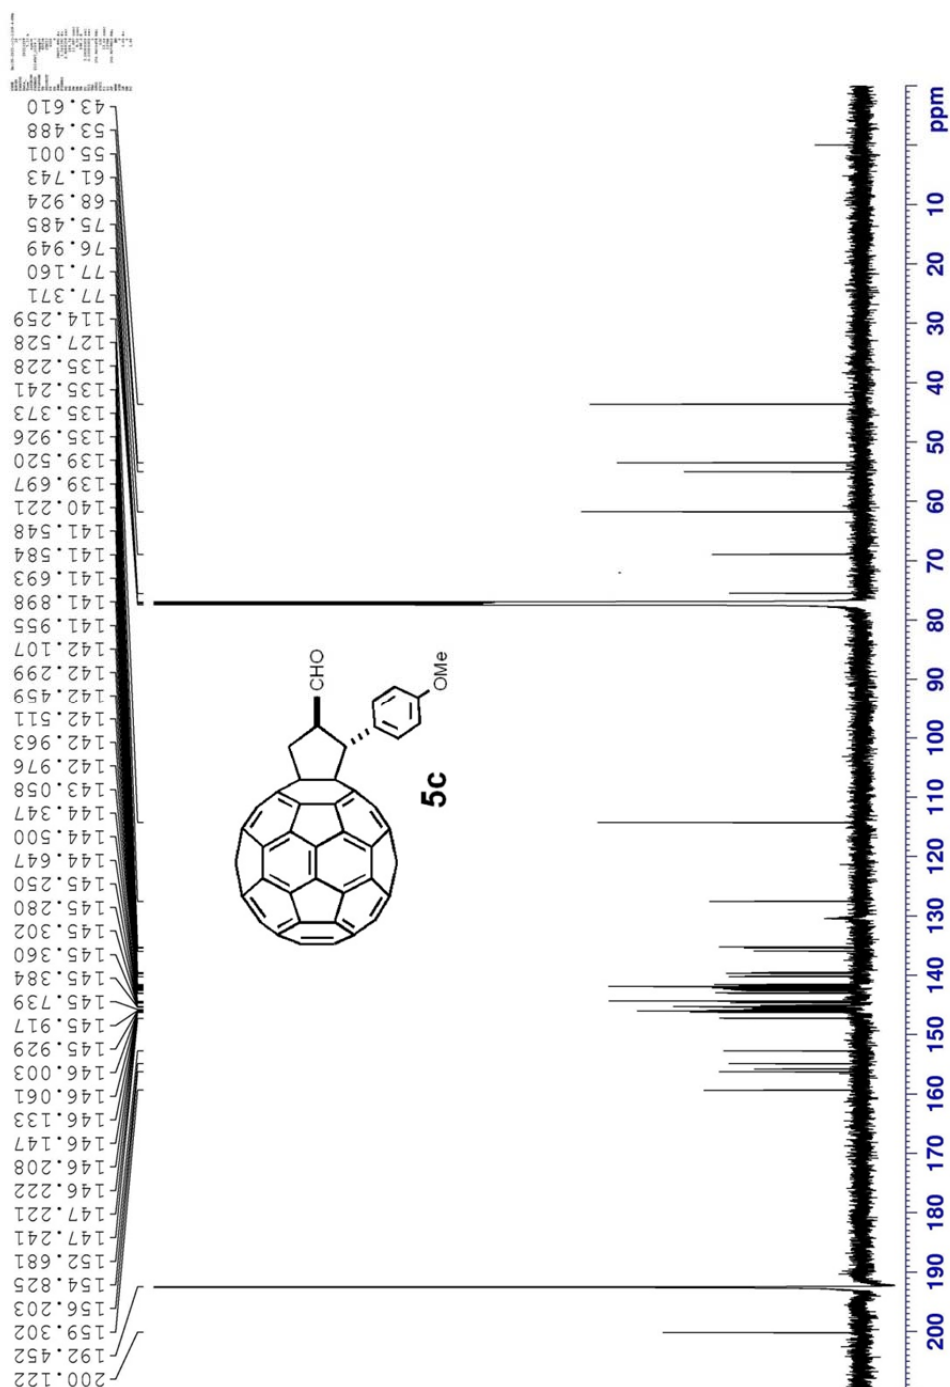

# Expanded <sup>13</sup>C NMR (150 MHz, CDCl<sub>3</sub>/CS<sub>2</sub>) of compound 5c

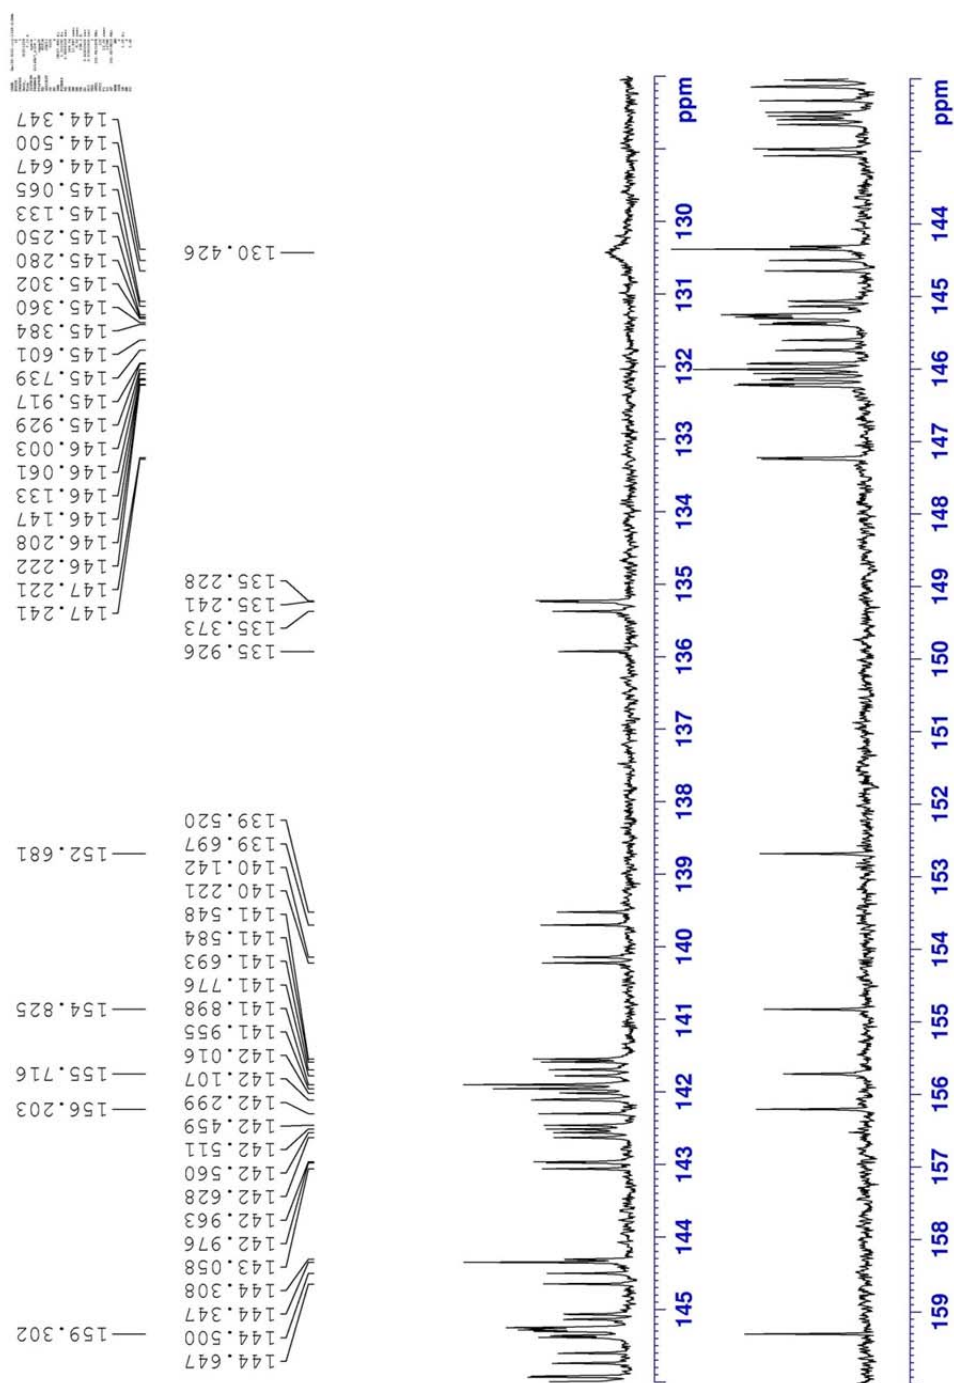

**<sup>1</sup>H NMR (400 MHz, CDCl<sub>3</sub>/CS<sub>2</sub>) of compound 5d**

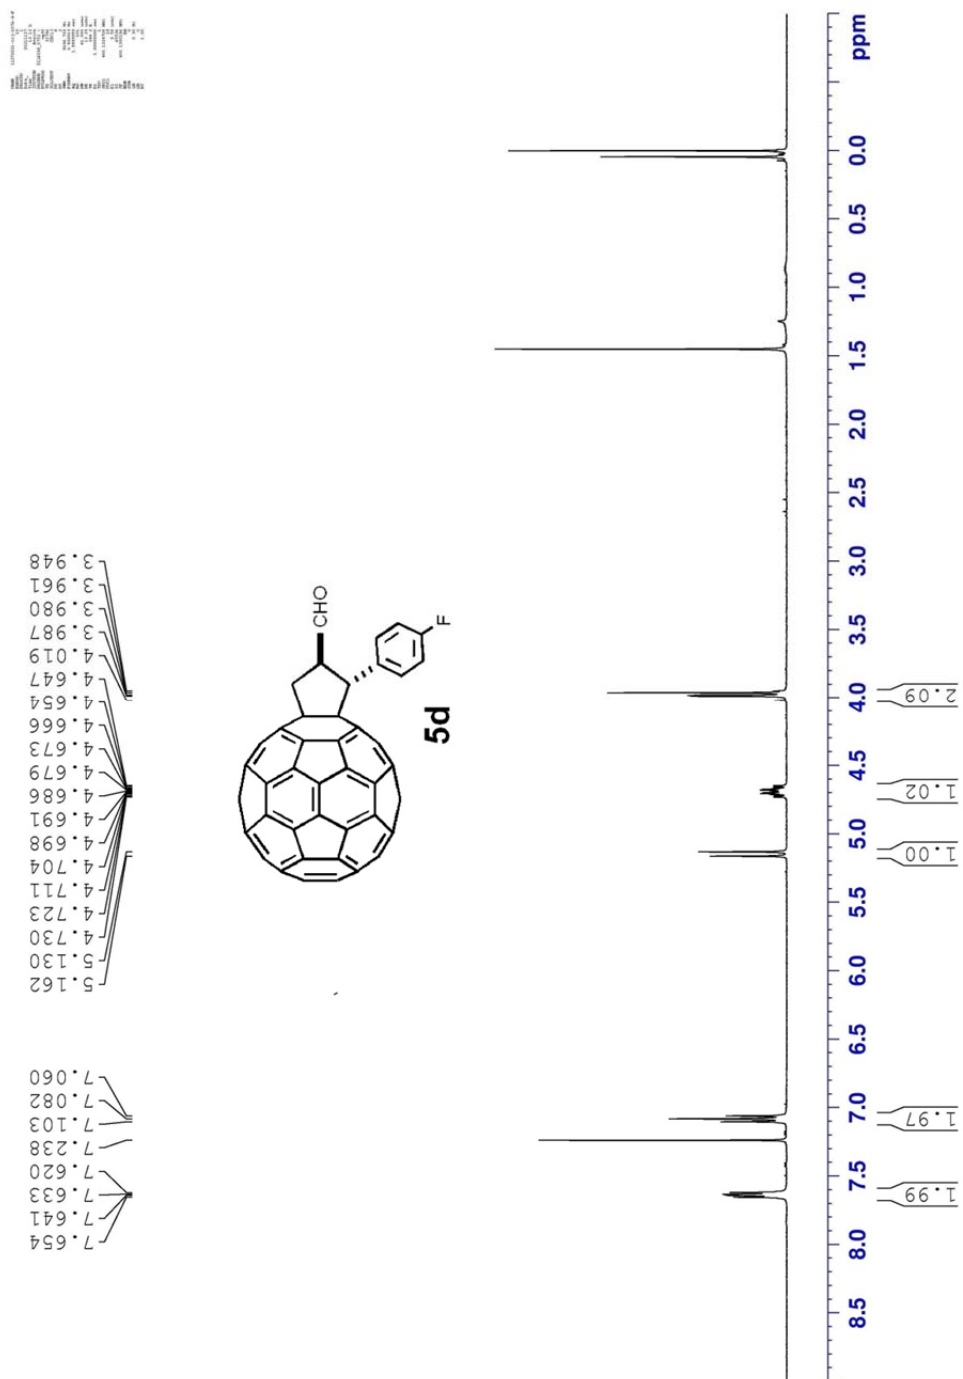

**$^{13}\text{C}$  NMR (150 MHz,  $\text{CDCl}_3/\text{CS}_2$ ) of compound 5d**

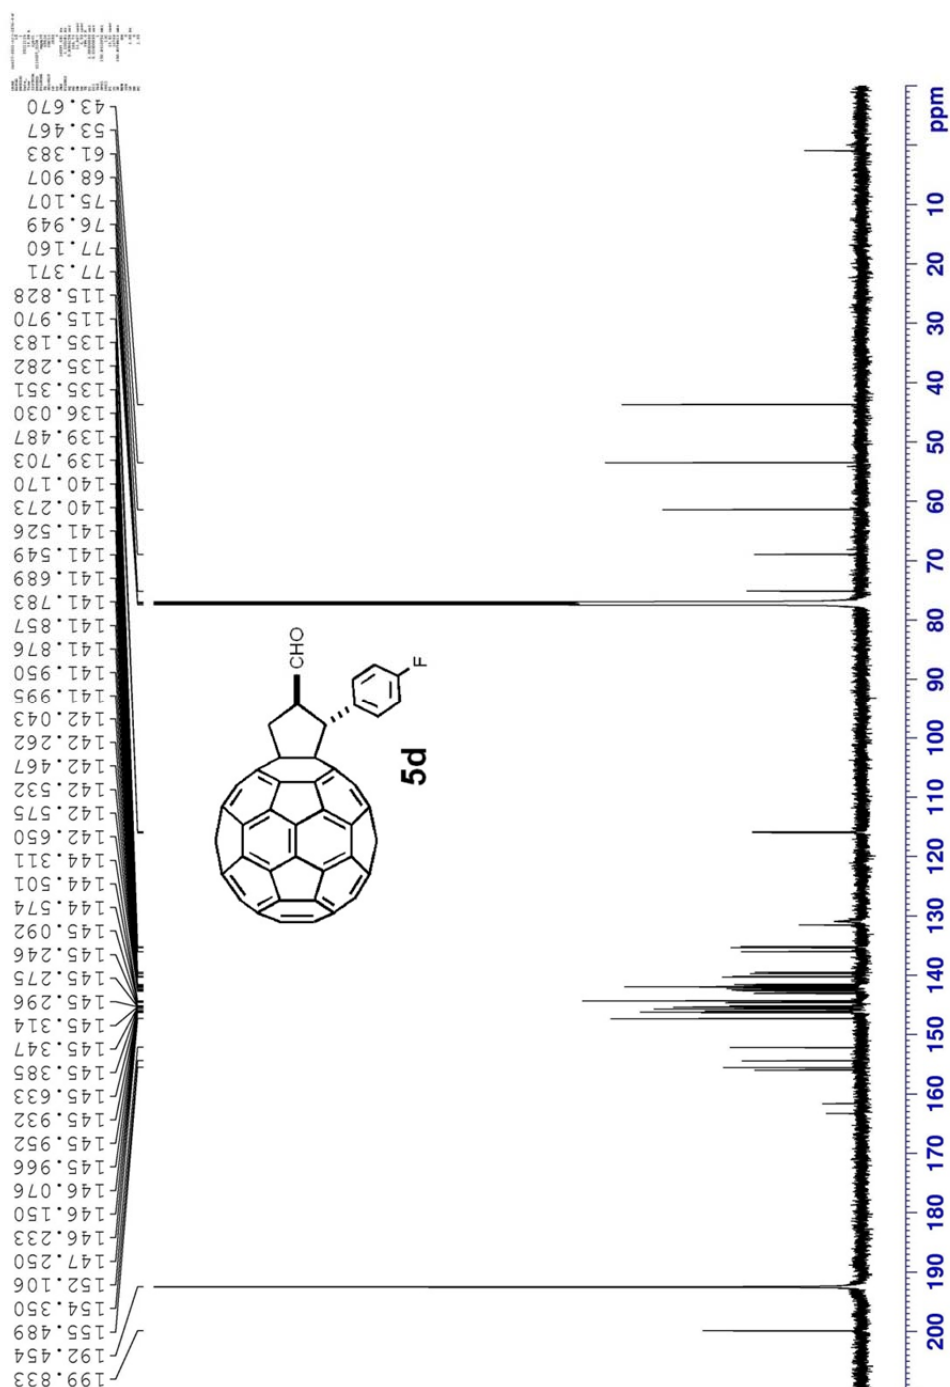

**Expanded  $^{13}\text{C}$  NMR (150 MHz,  $\text{CDCl}_3/\text{CS}_2$ ) of compound 5d**

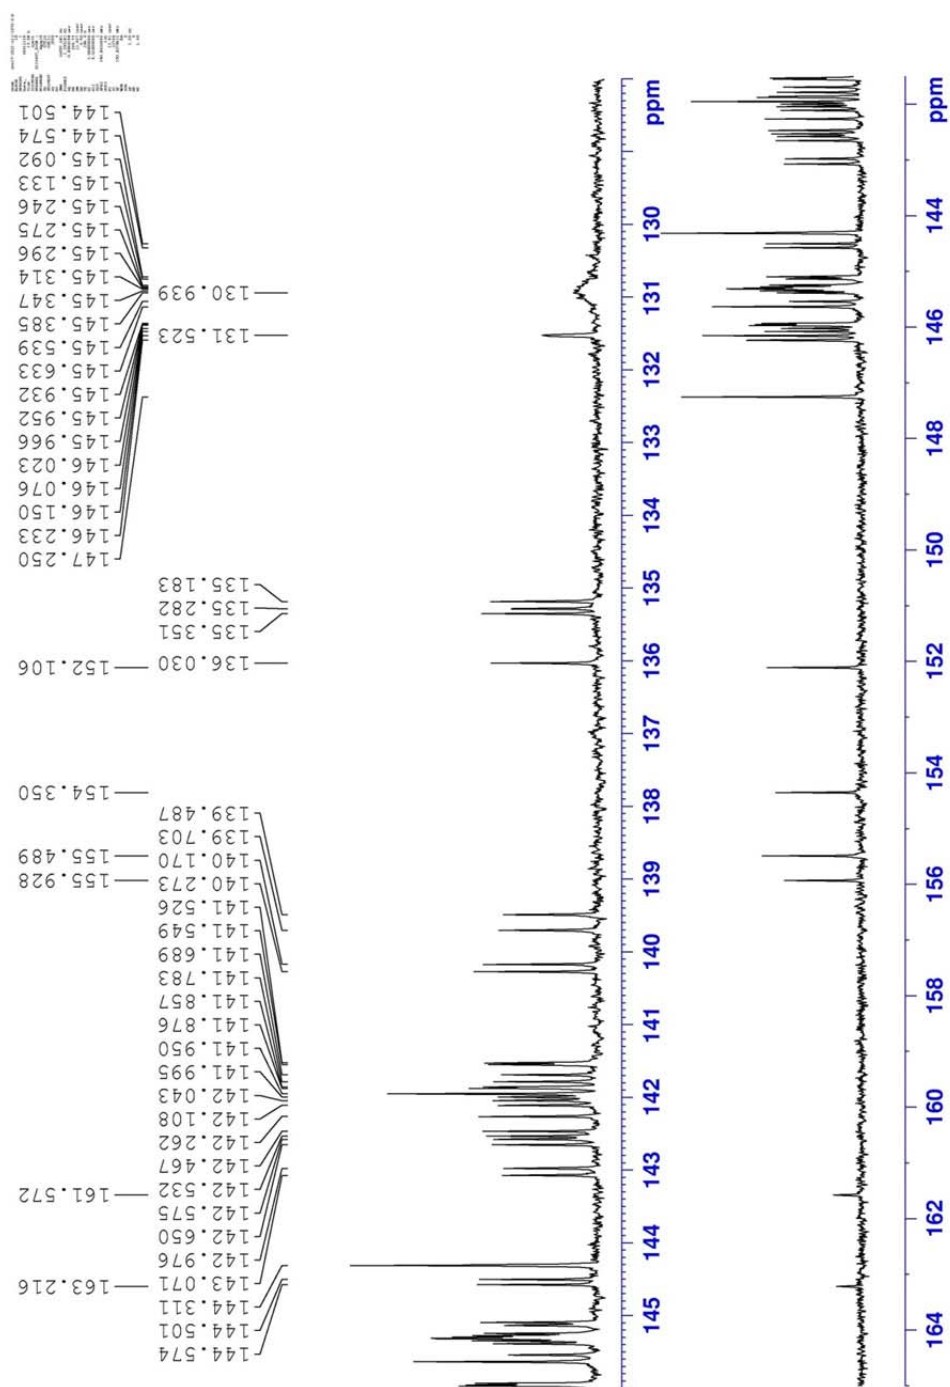

**$^{19}\text{F}$  NMR (377 MHz,  $\text{CDCl}_3/\text{CS}_2$ ) of compound 5d**

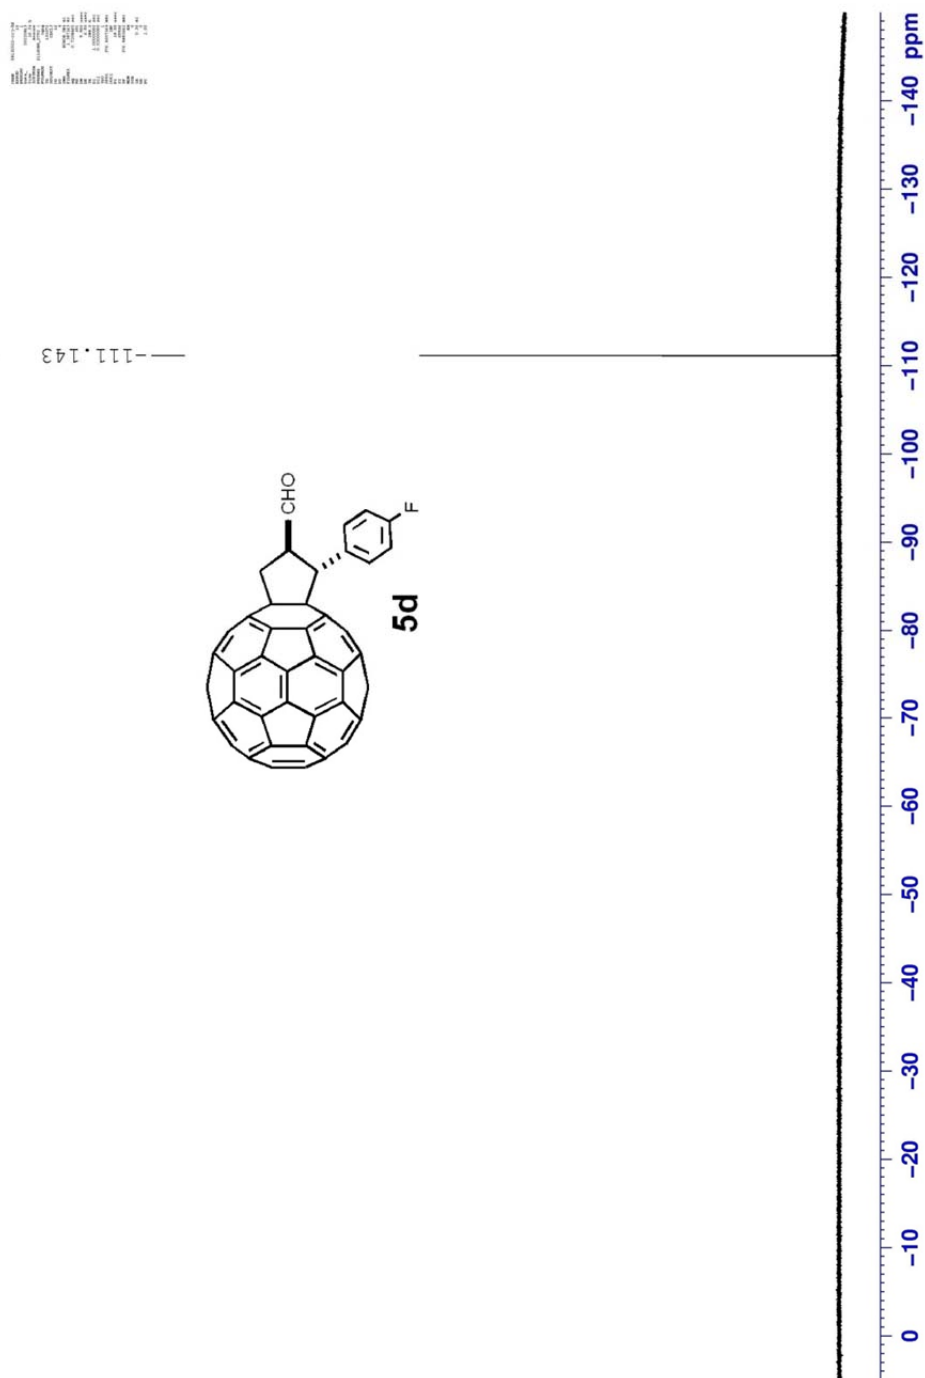

**<sup>1</sup>H NMR (400 MHz, CDCl<sub>3</sub>/CS<sub>2</sub>) of compound 5e**

10.128  
10.121

7.611  
7.590  
7.375  
7.354  
7.238

5.148  
5.117  
4.736  
4.729  
4.714  
4.707  
4.698  
4.692  
4.683  
4.675  
4.660  
4.653  
3.984  
3.962

1.451

0.043  
0.000

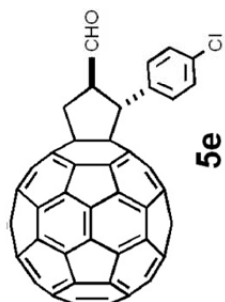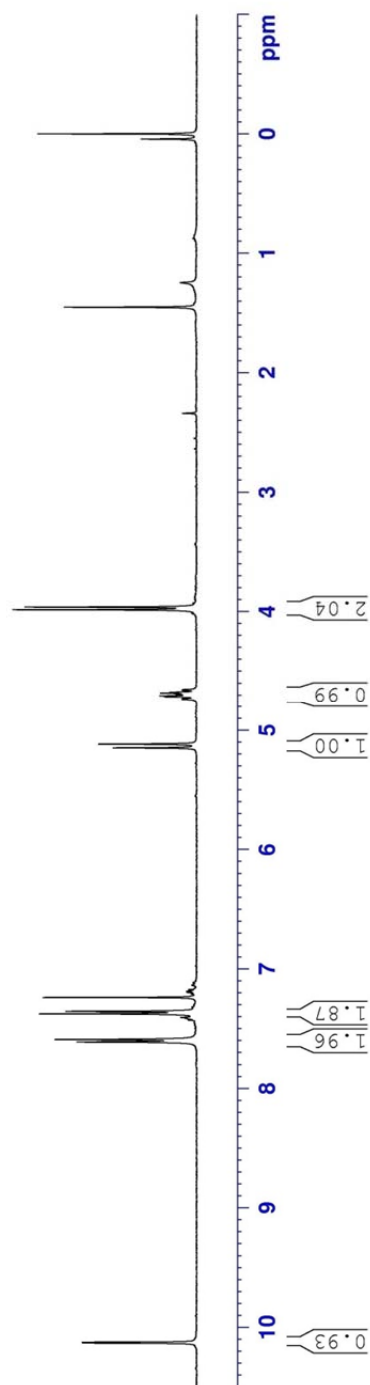

**$^{13}\text{C}$  NMR (150 MHz,  $\text{CDCl}_3/\text{CS}_2$ ) of compound **5e****

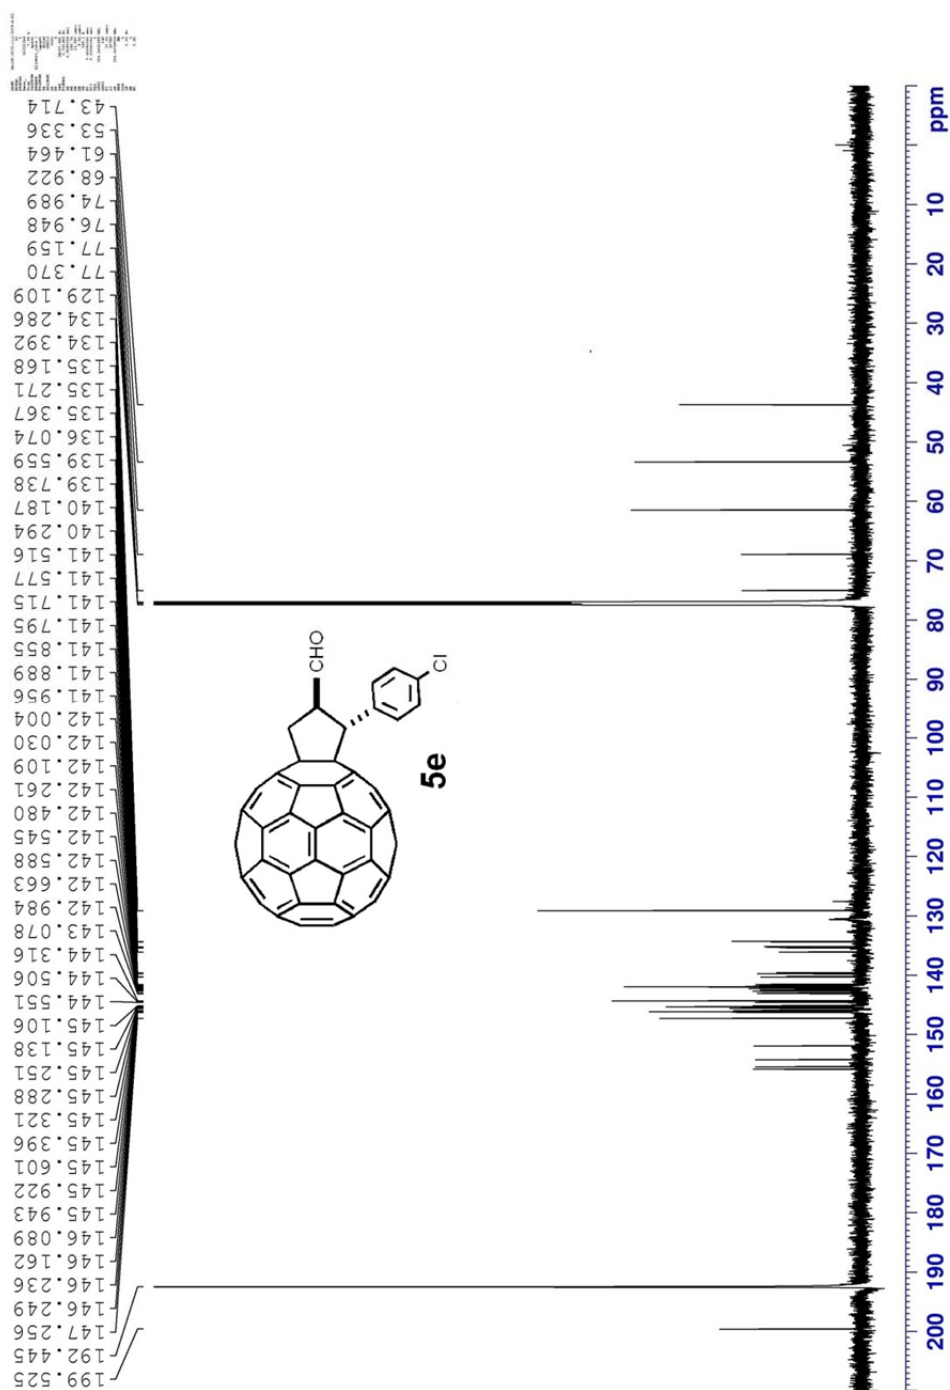

Expanded  $^{13}\text{C}$  NMR (150 MHz,  $\text{CDCl}_3/\text{CS}_2$ ) of compound **5e**

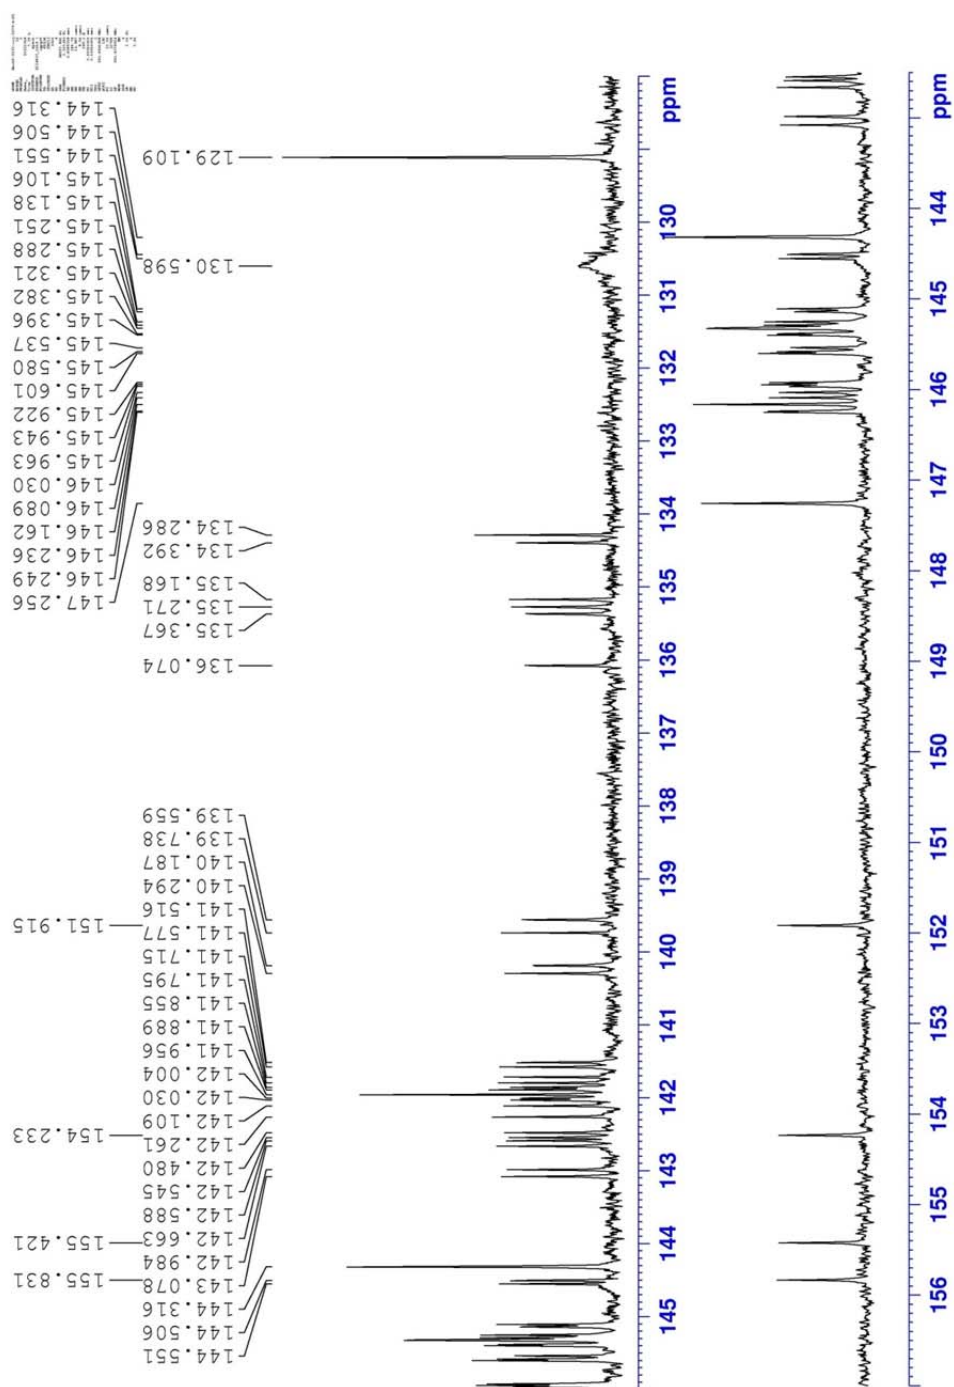

**<sup>1</sup>H NMR (400 MHz, CDCl<sub>3</sub>/CS<sub>2</sub>) of compound 5f**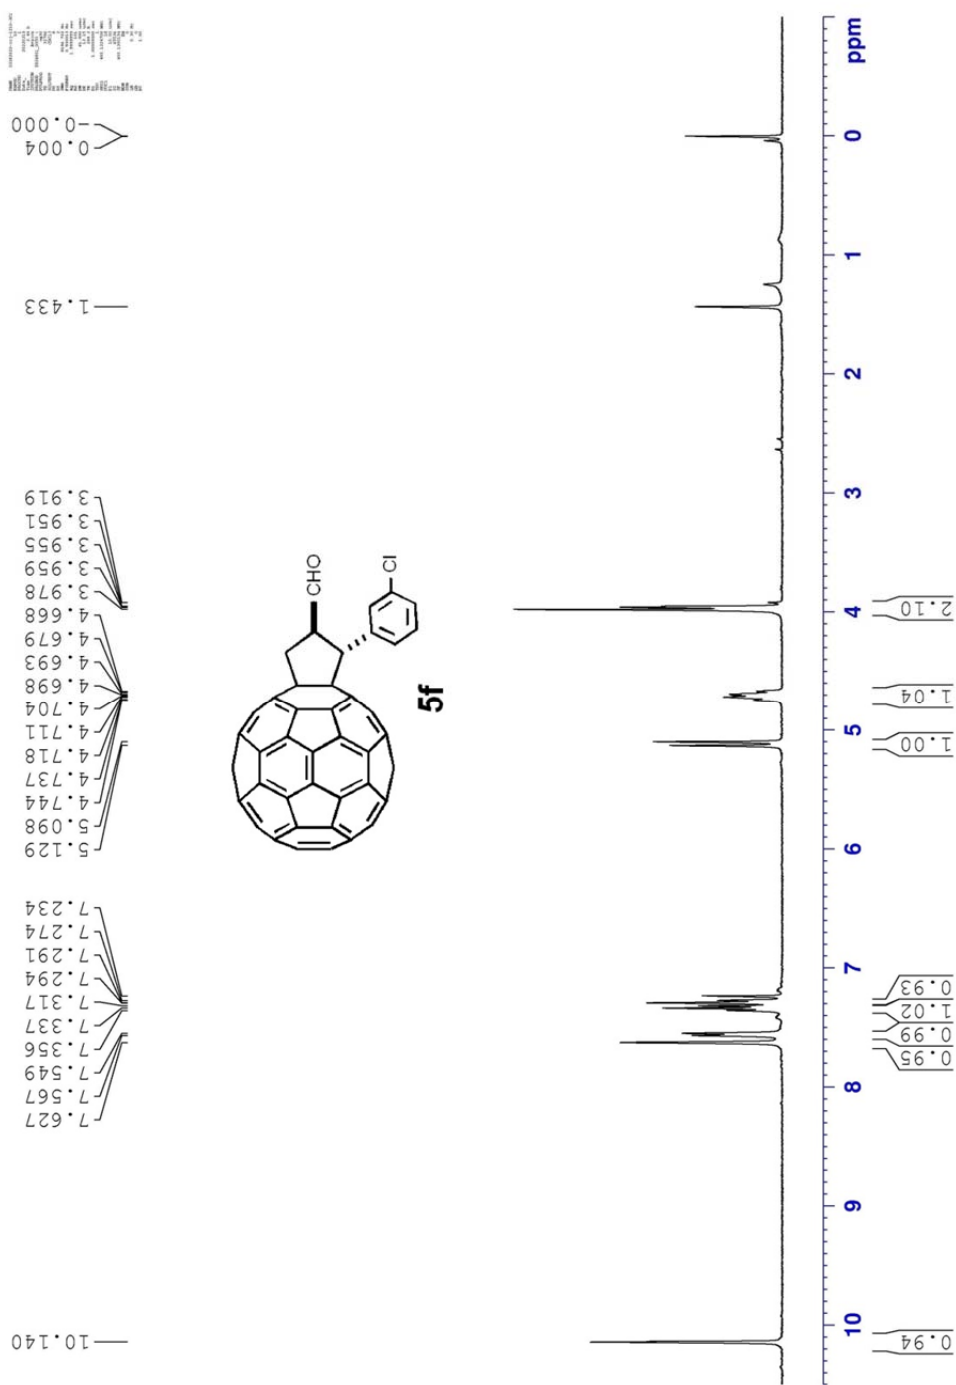

**$^{13}\text{C}$  NMR (150 MHz,  $\text{CDCl}_3/\text{CS}_2$ ) of compound 5f**

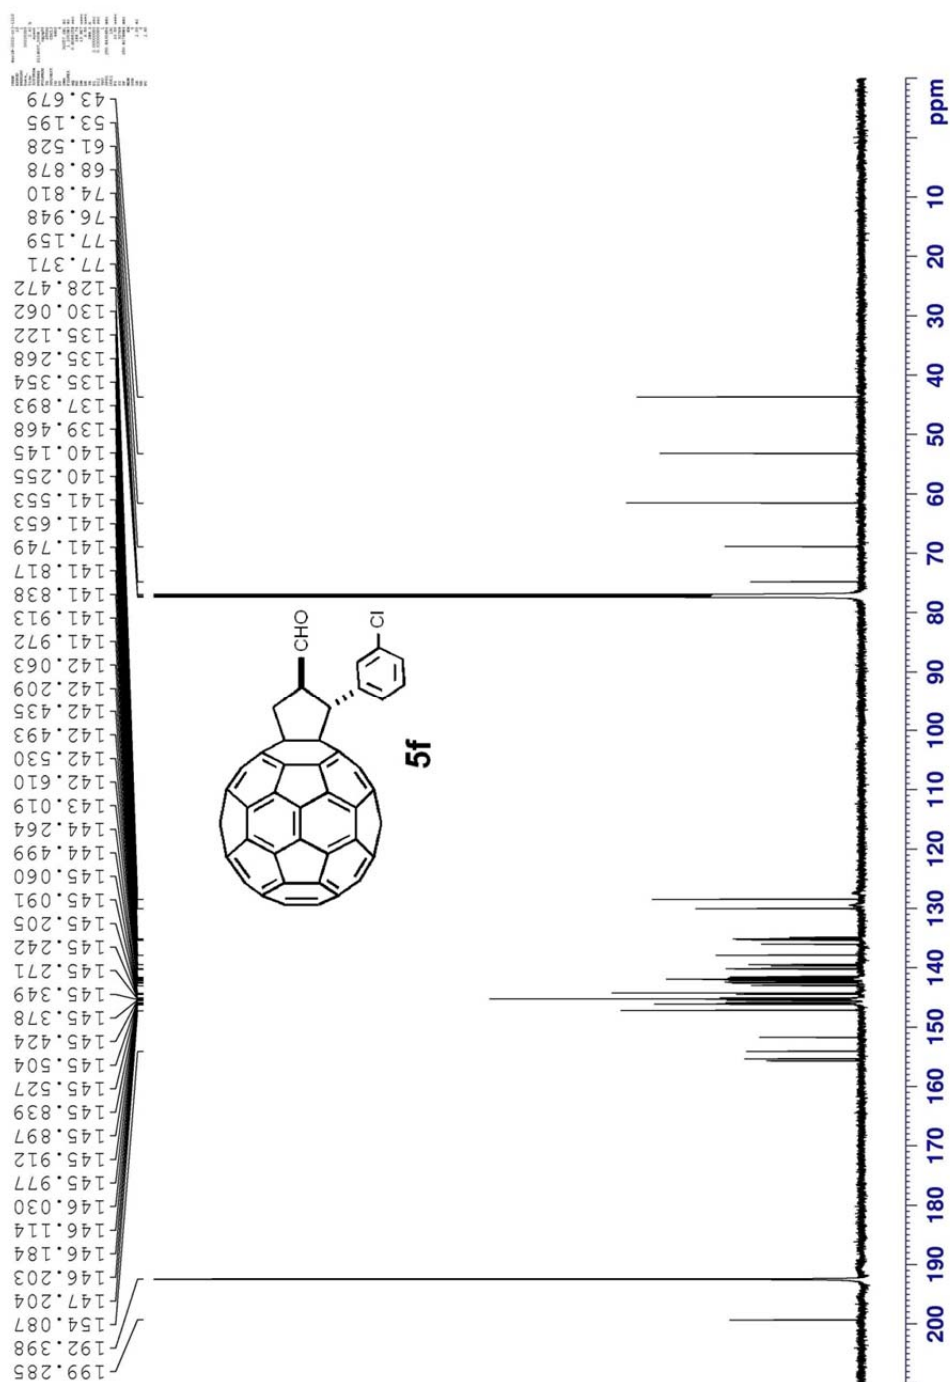

**Expanded  $^{13}\text{C}$  NMR (150 MHz,  $\text{CDCl}_3/\text{CS}_2$ ) of compound 5f**

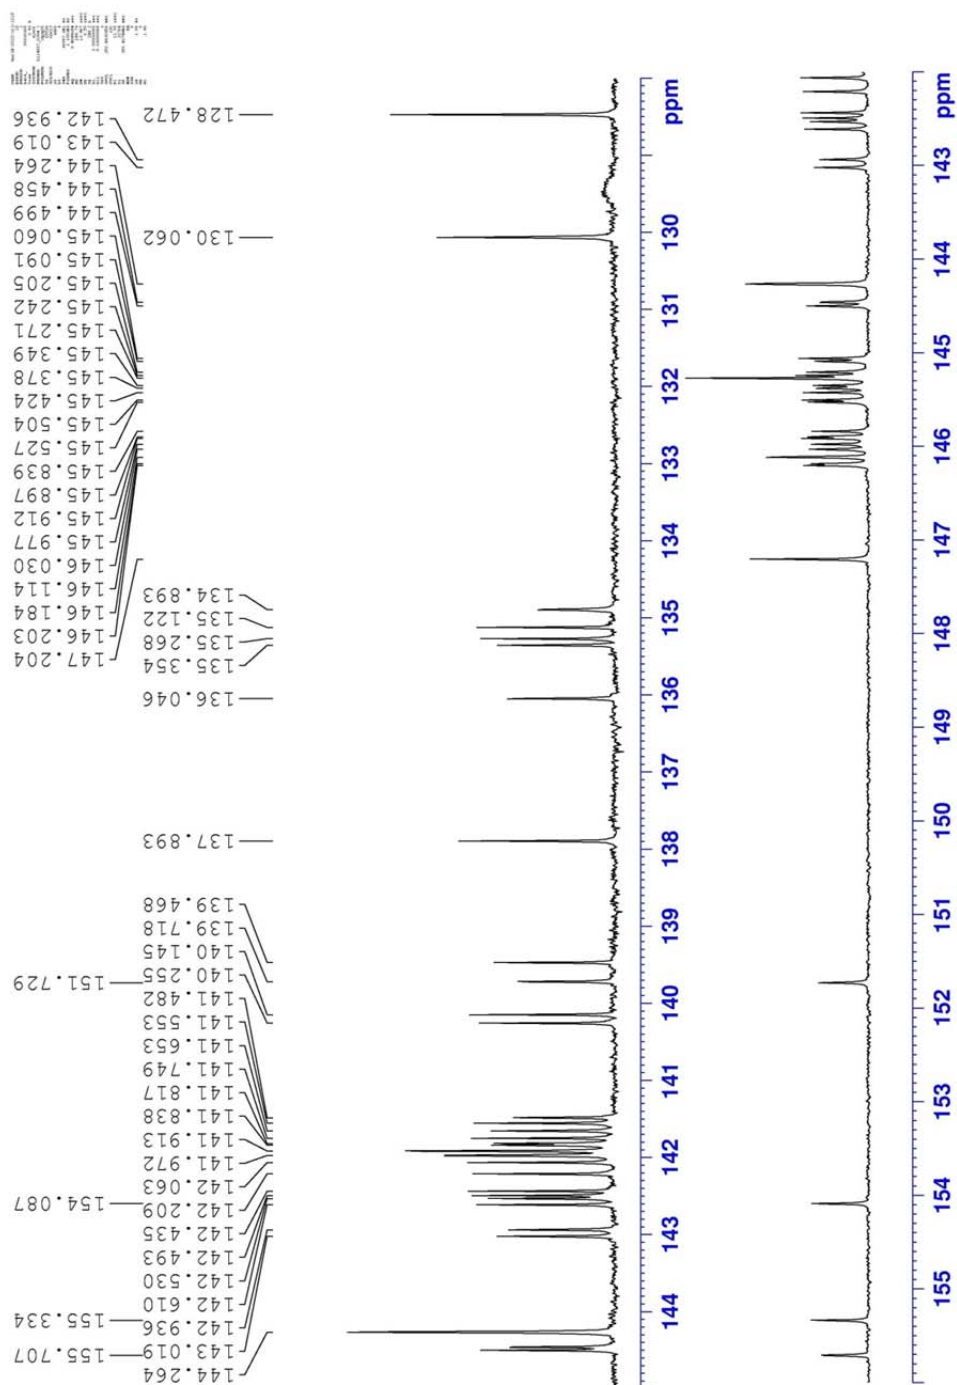

<sup>1</sup>H NMR (400 MHz, CDCl<sub>3</sub>/CS<sub>2</sub>) of compound **5g**

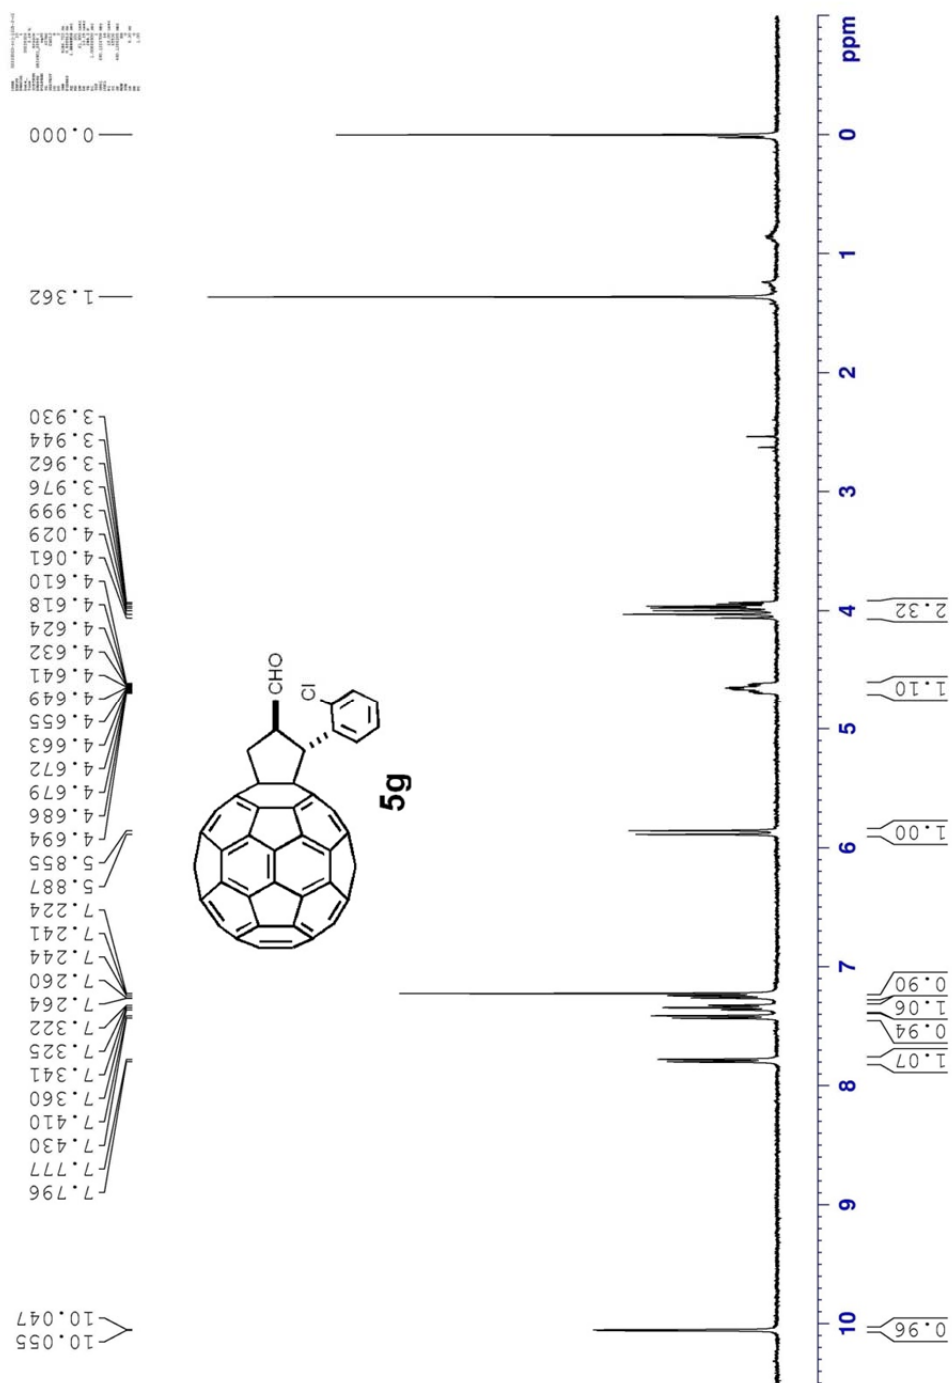

$^{13}\text{C}$  NMR (150 MHz,  $\text{CDCl}_3/\text{CS}_2$ ) of compound **5g**

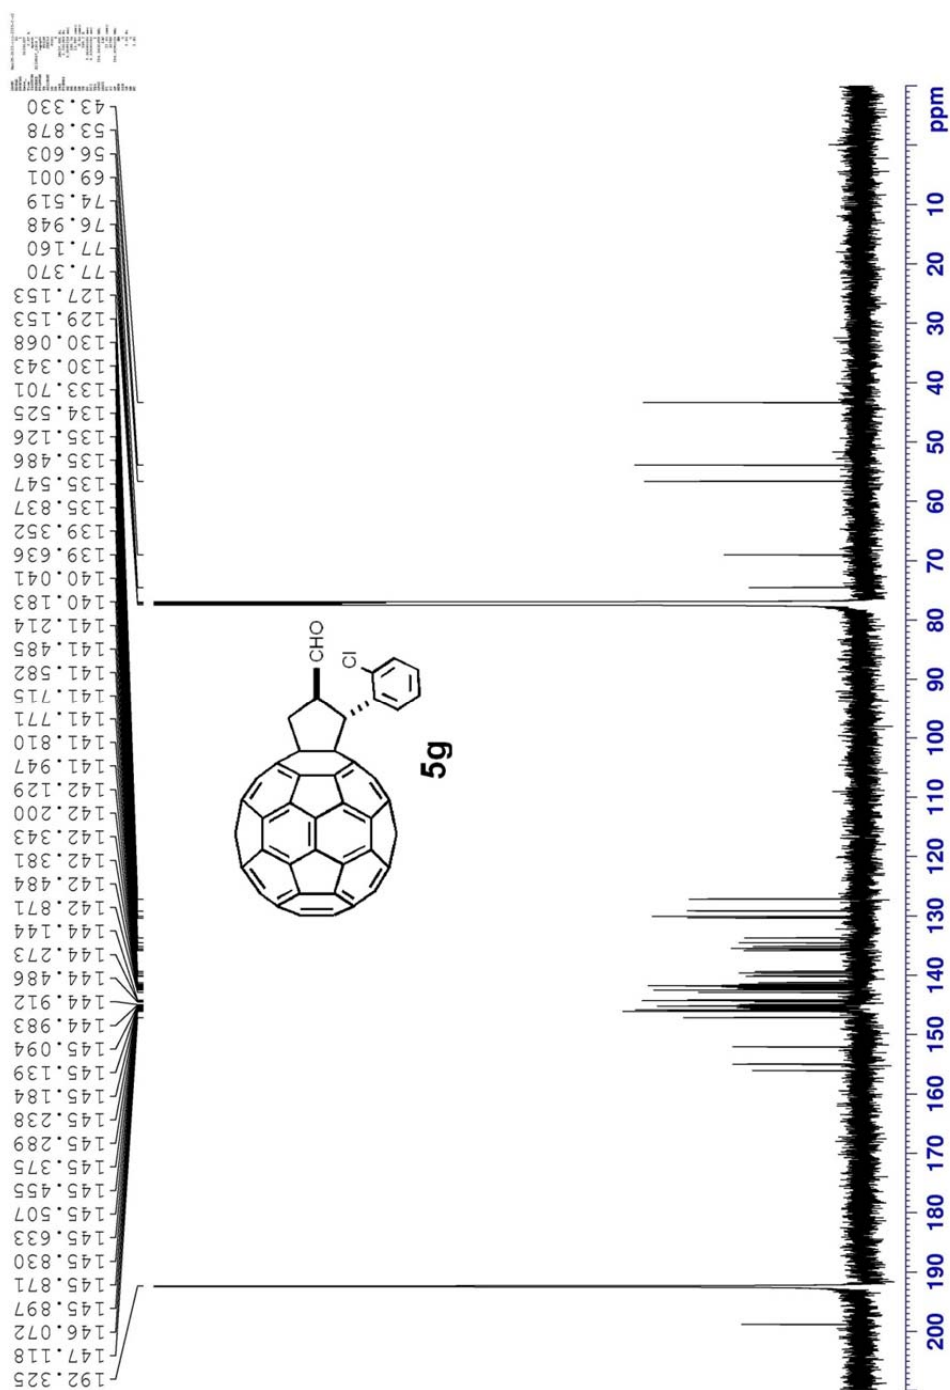

Expanded  $^{13}\text{C}$  NMR (150 MHz,  $\text{CDCl}_3/\text{CS}_2$ ) of compound 5g

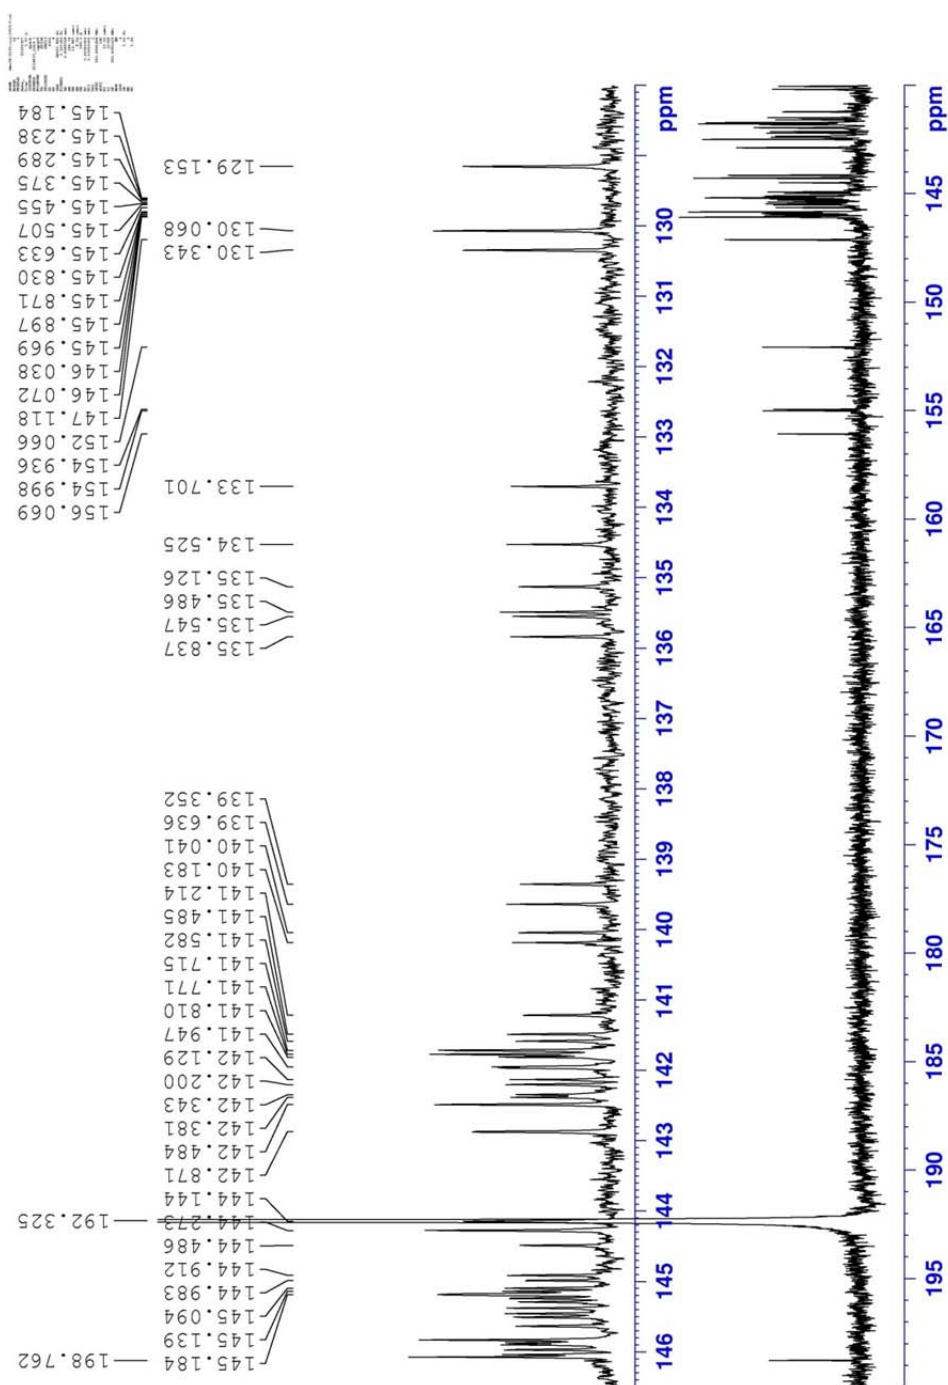

**$^1\text{H}$  NMR (400 MHz,  $\text{CDCl}_3/\text{CS}_2$ ) of compound 5h**

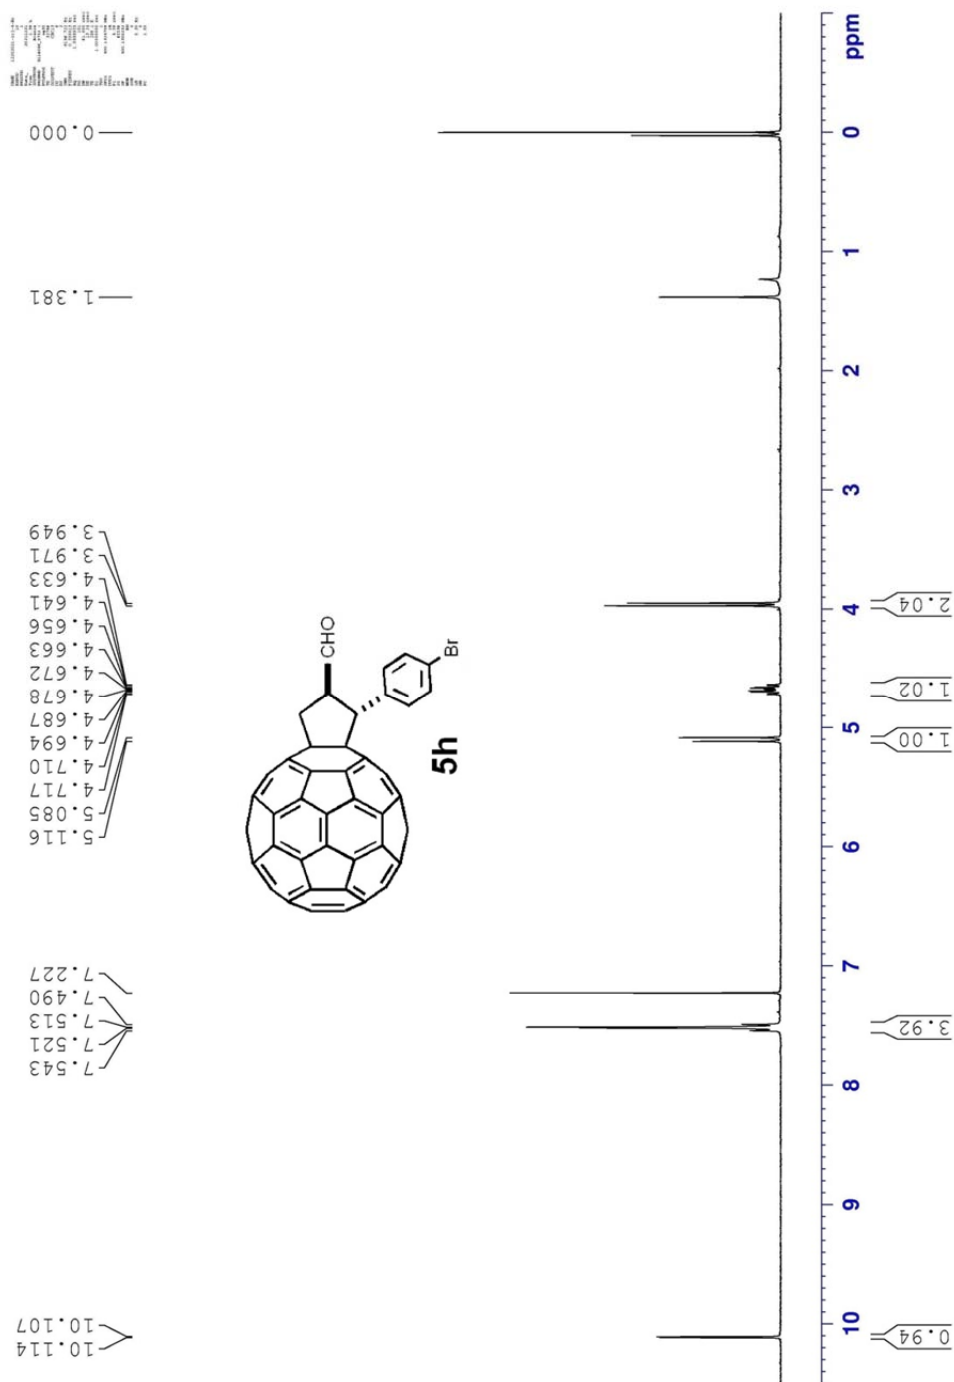

**$^{13}\text{C}$  NMR (150 MHz,  $\text{CDCl}_3/\text{CS}_2$ ) of compound 5h**

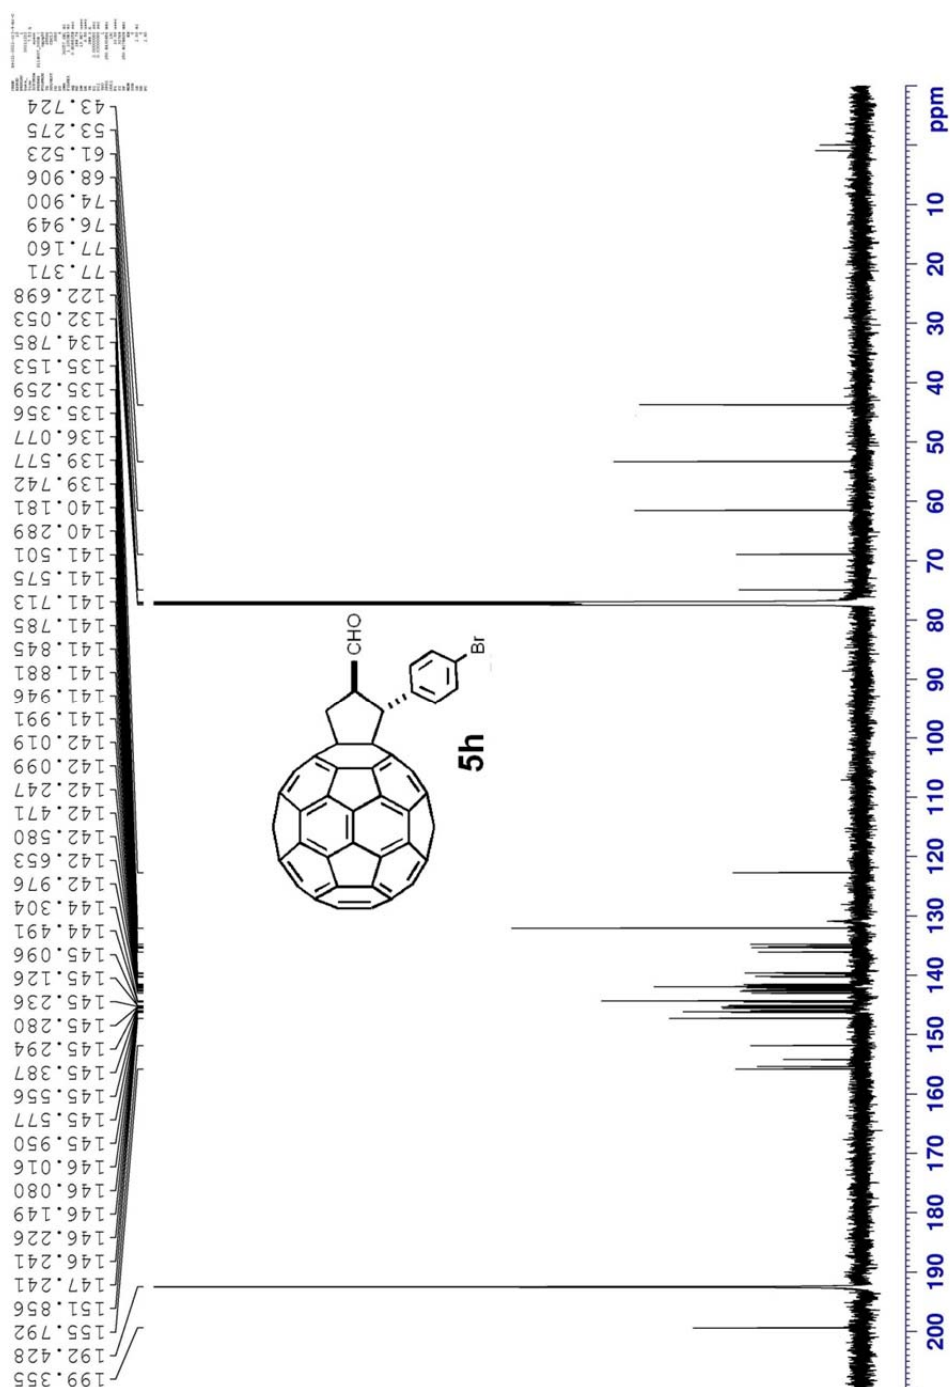

**Expanded  $^{13}\text{C}$  NMR (150 MHz,  $\text{CDCl}_3/\text{CS}_2$ ) of compound 5h**

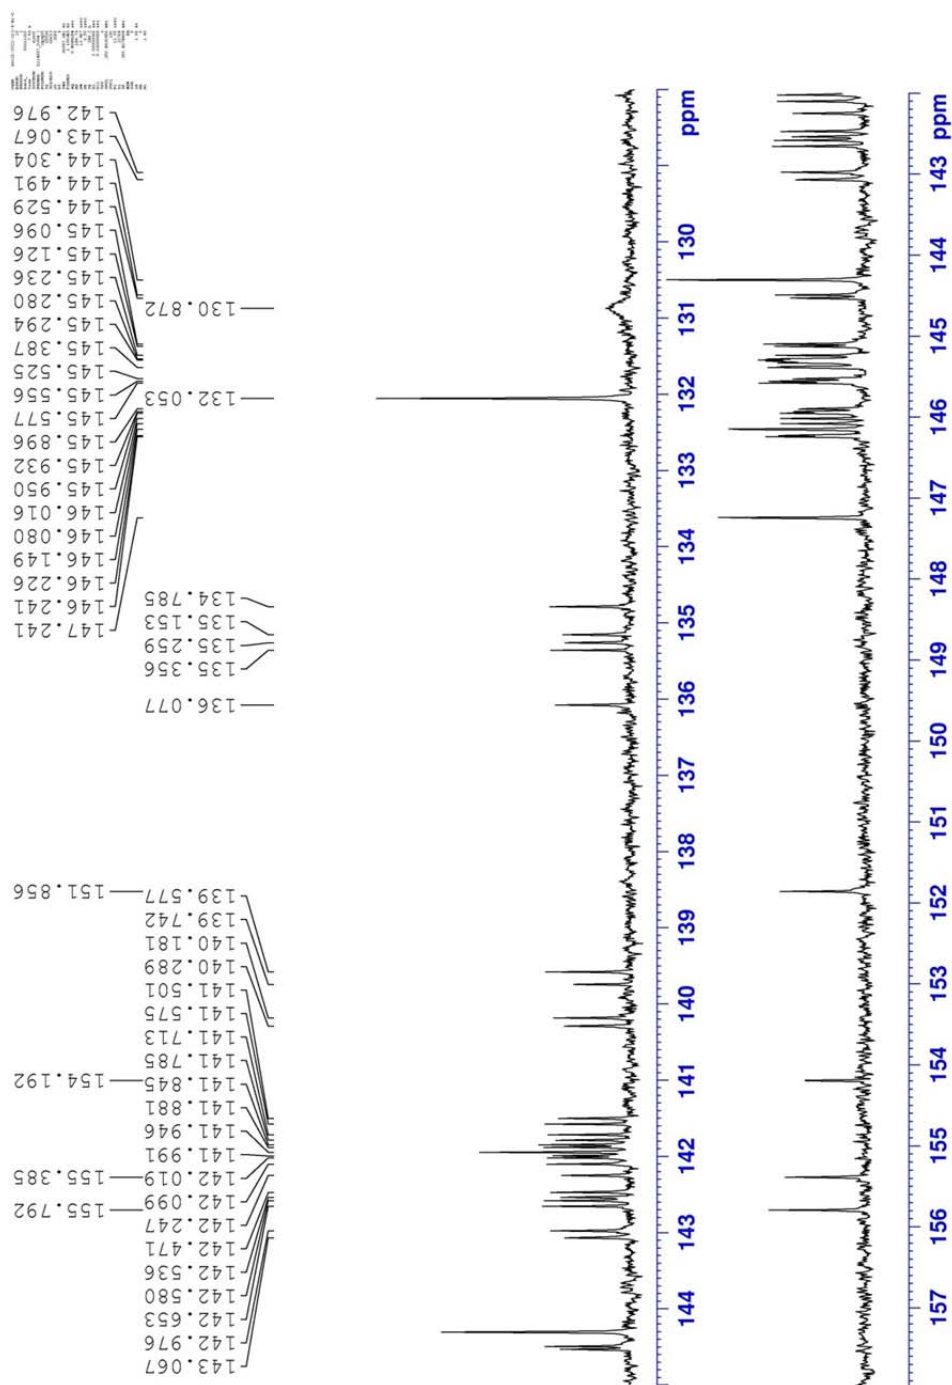

**<sup>1</sup>H NMR (400 MHz, CDCl<sub>3</sub>/CS<sub>2</sub>) of compound 5i**

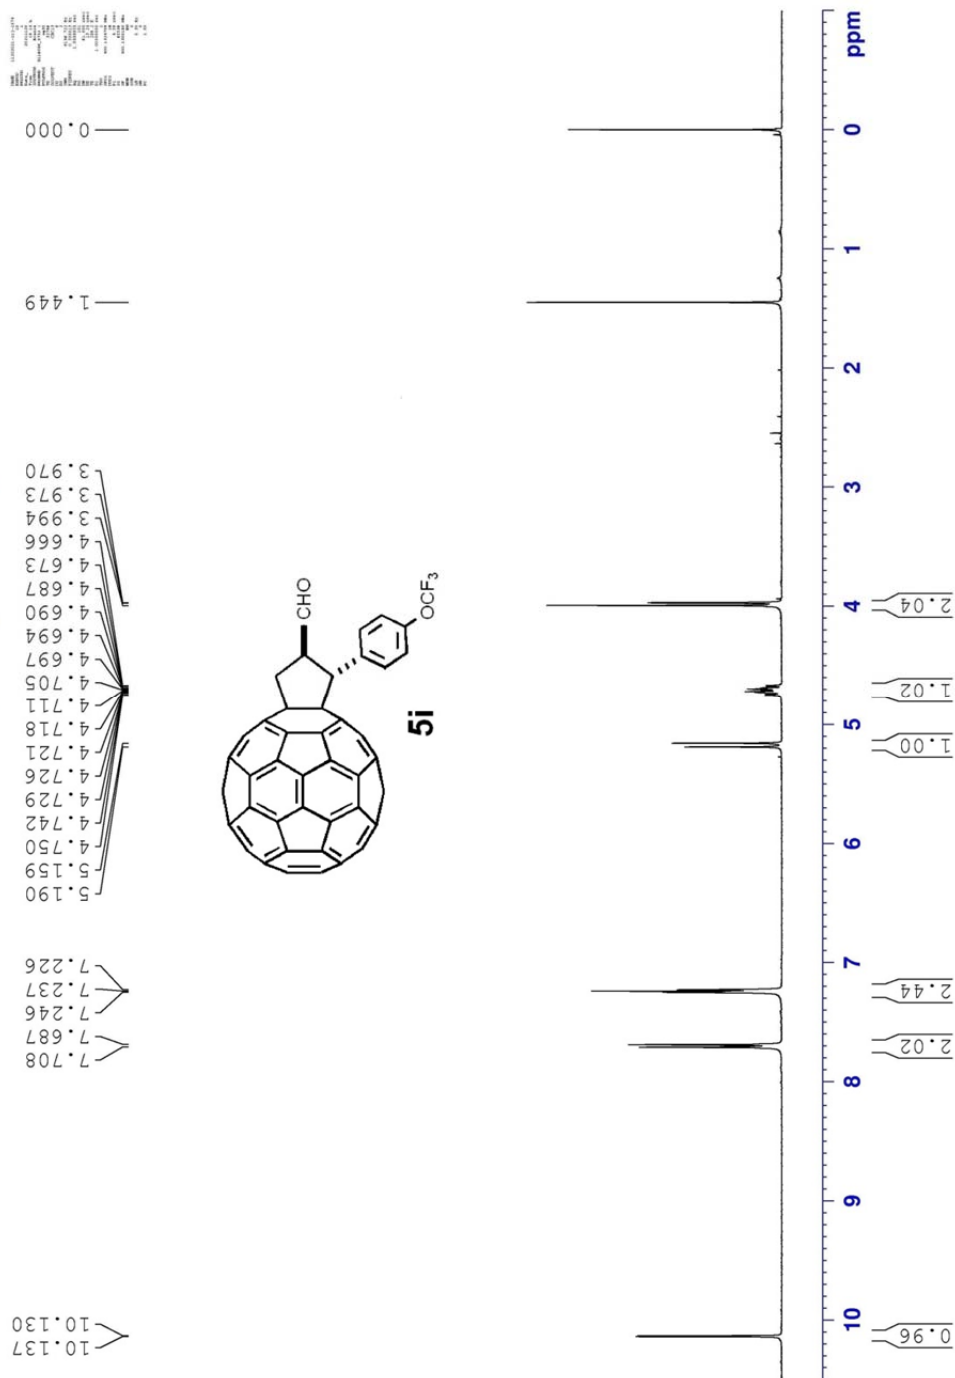

**$^{13}\text{C}$  NMR (150 MHz,  $\text{CDCl}_3/\text{CS}_2$ ) of compound **5i****

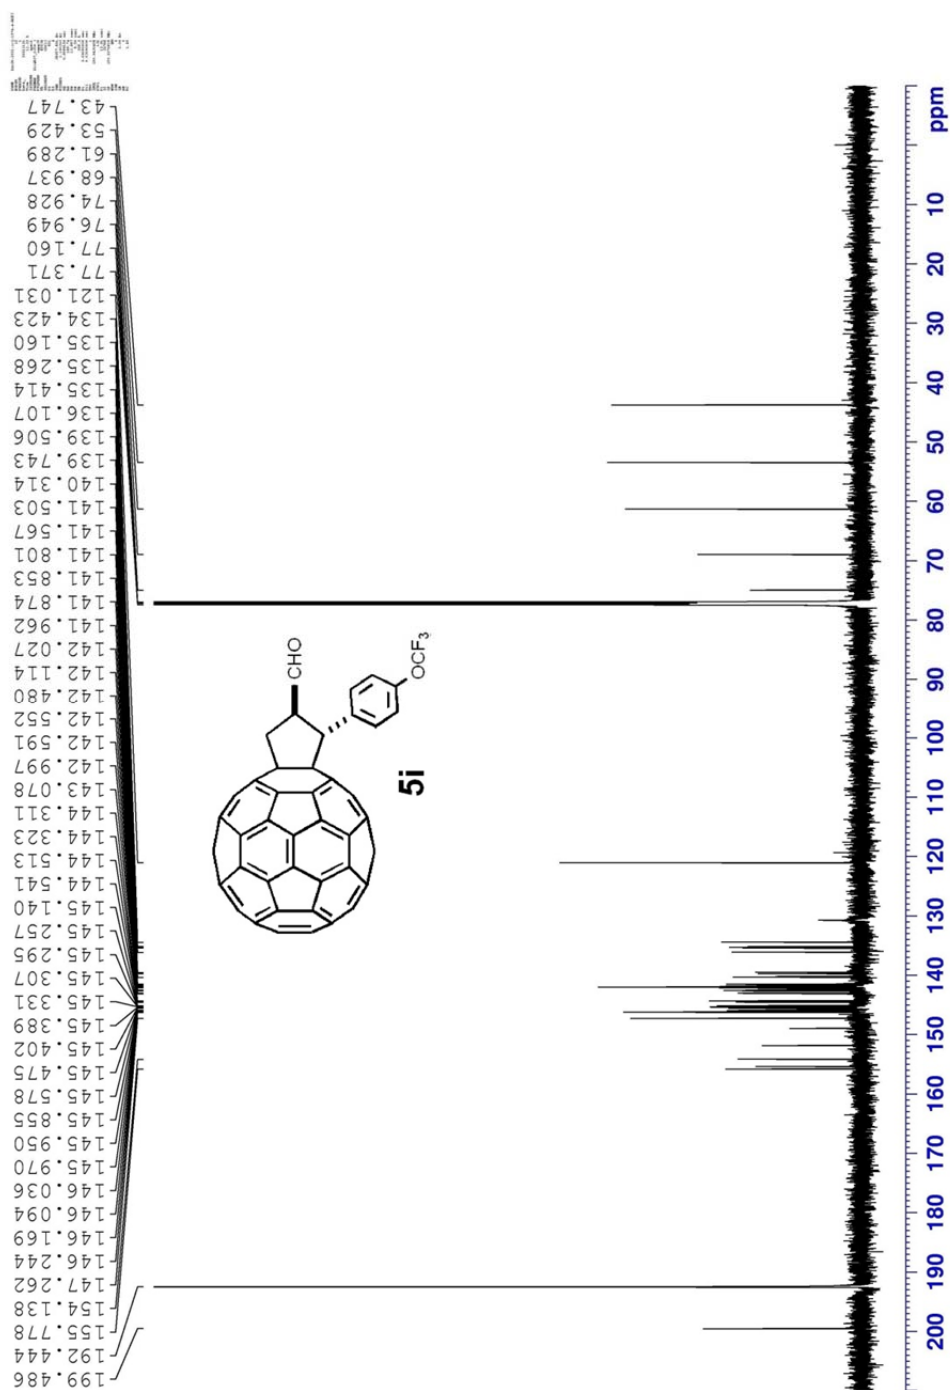

Figure 1. A schematic diagram of the experimental design. The diagram shows a sequence of events: a subject is presented with a stimulus (a word or picture), then a response is recorded (e.g., a button press), and finally, the response is evaluated (e.g., a correct/incorrect judgment). The diagram also indicates the timing of these events, with a 1000 ms interval between the stimulus and the response, and a 1000 ms interval between the response and the evaluation.

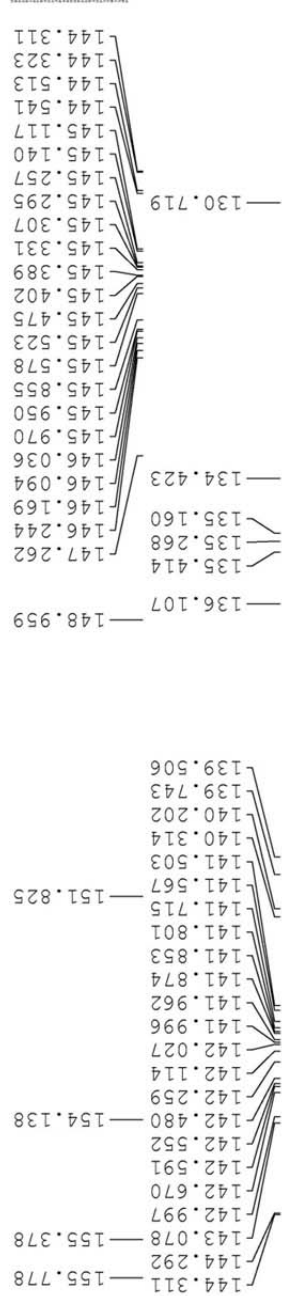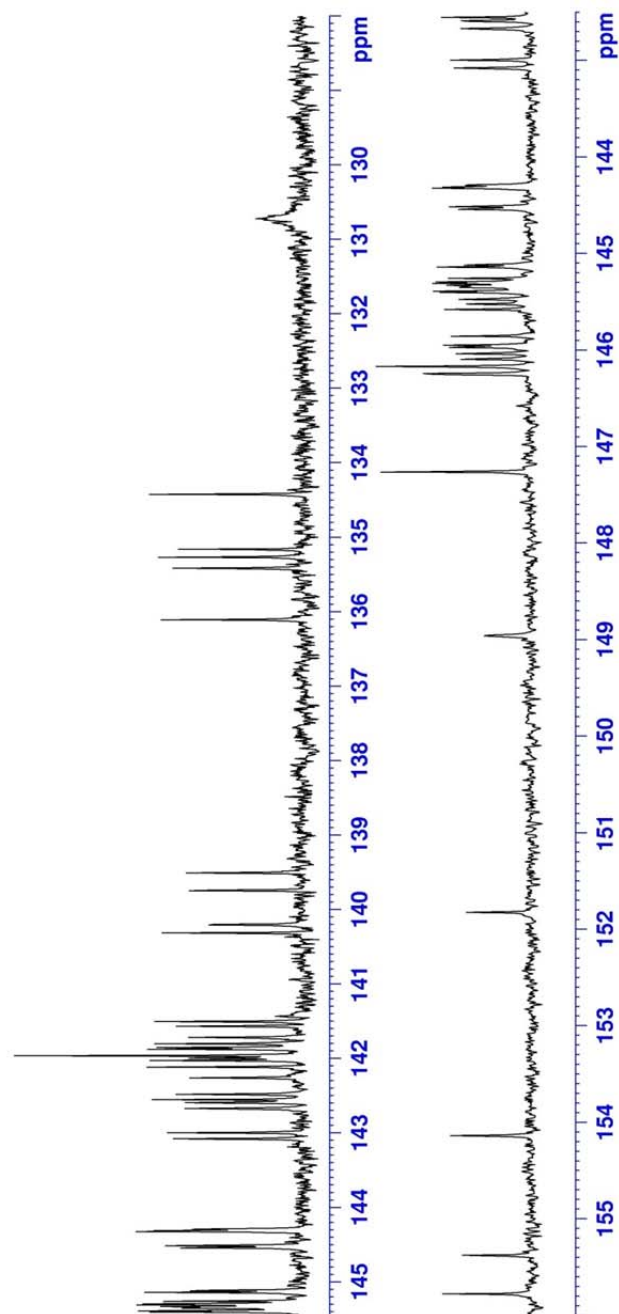

**$^{19}\text{F}$  NMR (565 MHz,  $\text{CDCl}_3/\text{CS}_2$ ) of compound **5i****

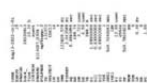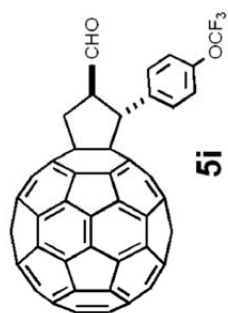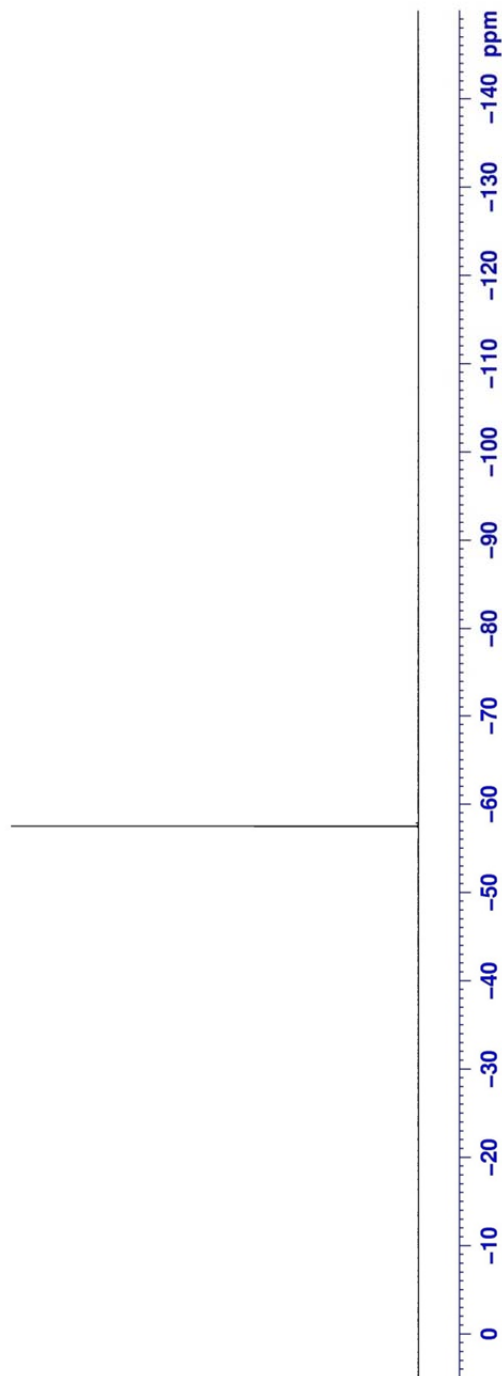

**<sup>1</sup>H NMR (400 MHz, CDCl<sub>3</sub>/CS<sub>2</sub>) of compound 5j**

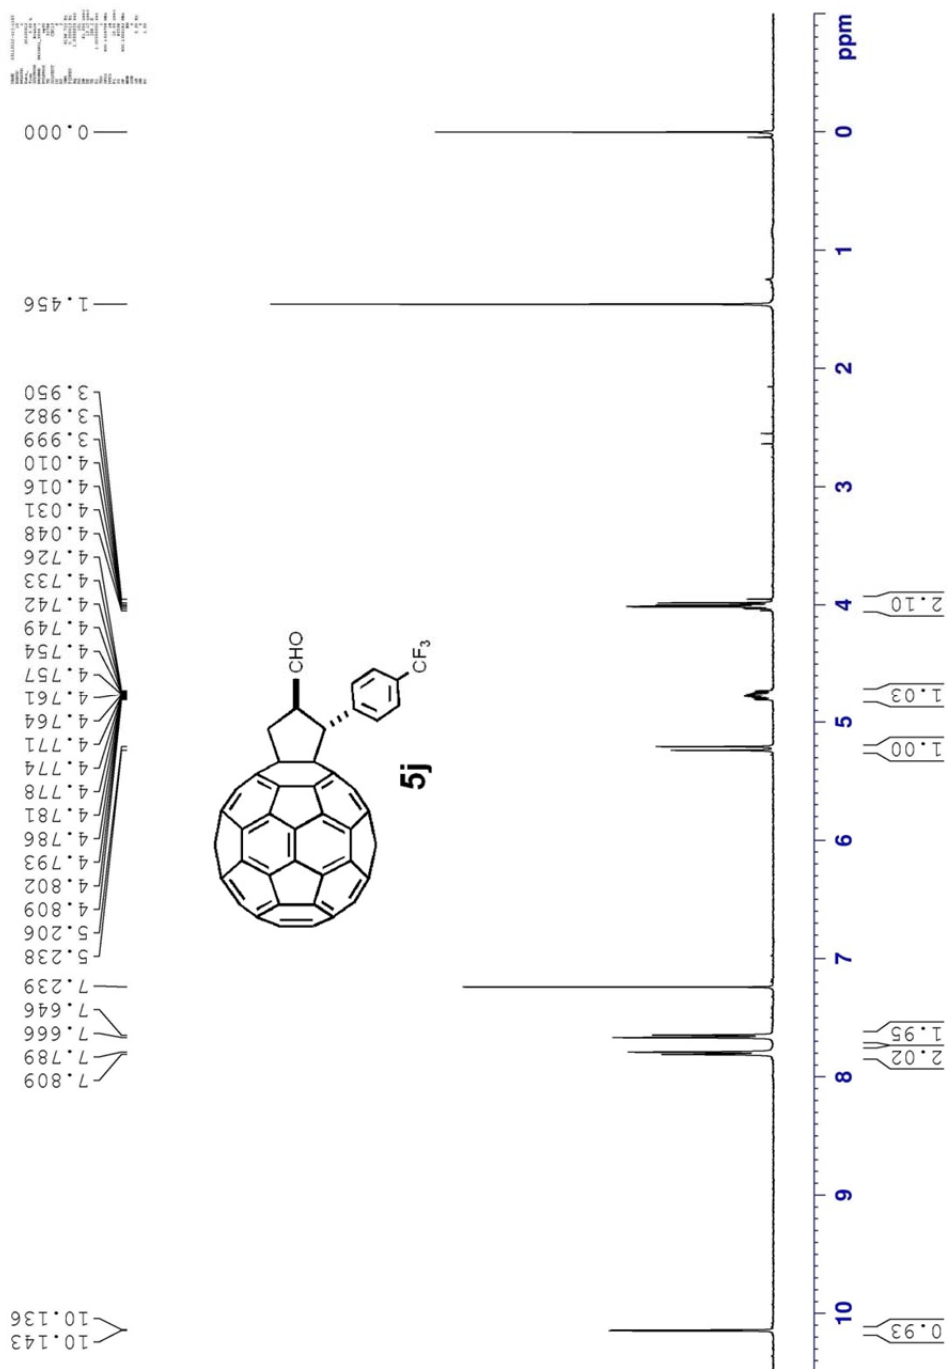

<sup>13</sup>C NMR (150 MHz, CDCl<sub>3</sub>/CS<sub>2</sub>) of compound 5j

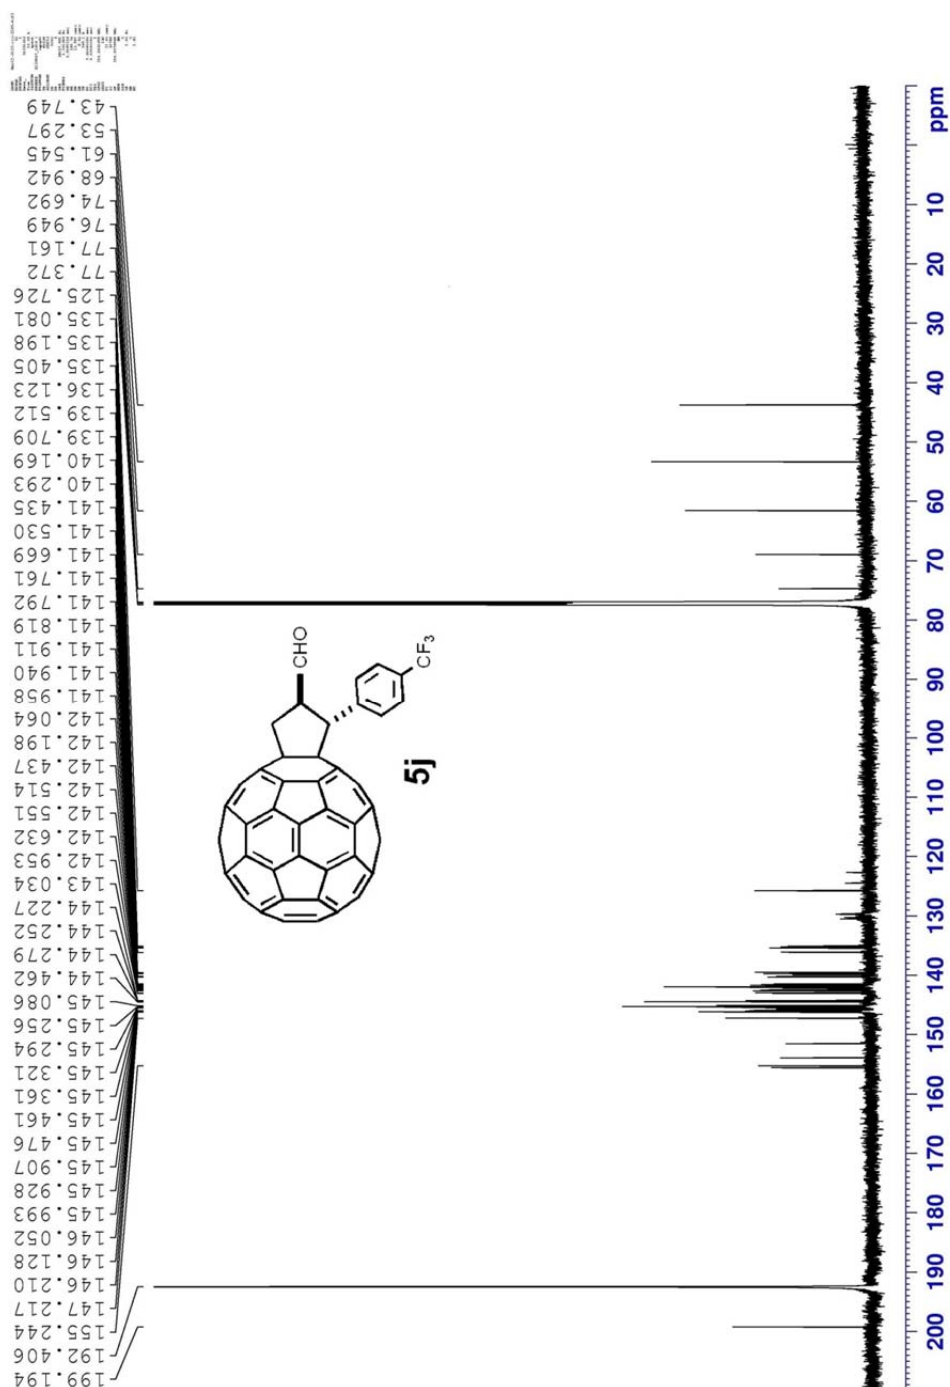

Expanded  $^{13}\text{C}$  NMR (150 MHz,  $\text{CDCl}_3/\text{CS}_2$ ) of compound 5j

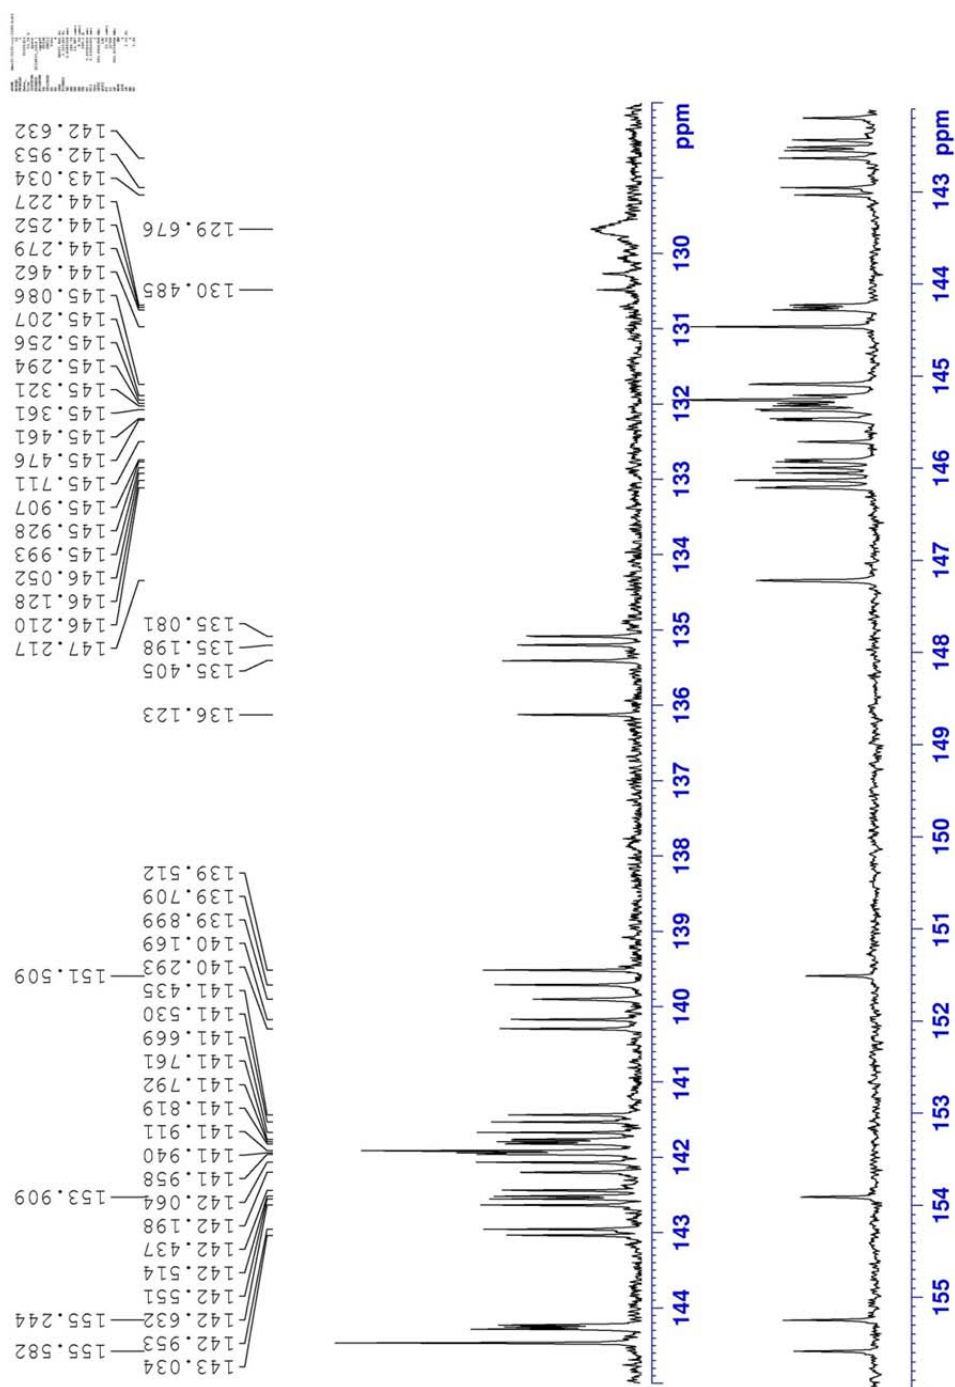



**$^1\text{H}$  NMR (400 MHz,  $\text{CDCl}_3/\text{CS}_2$ ) of compound 5k**

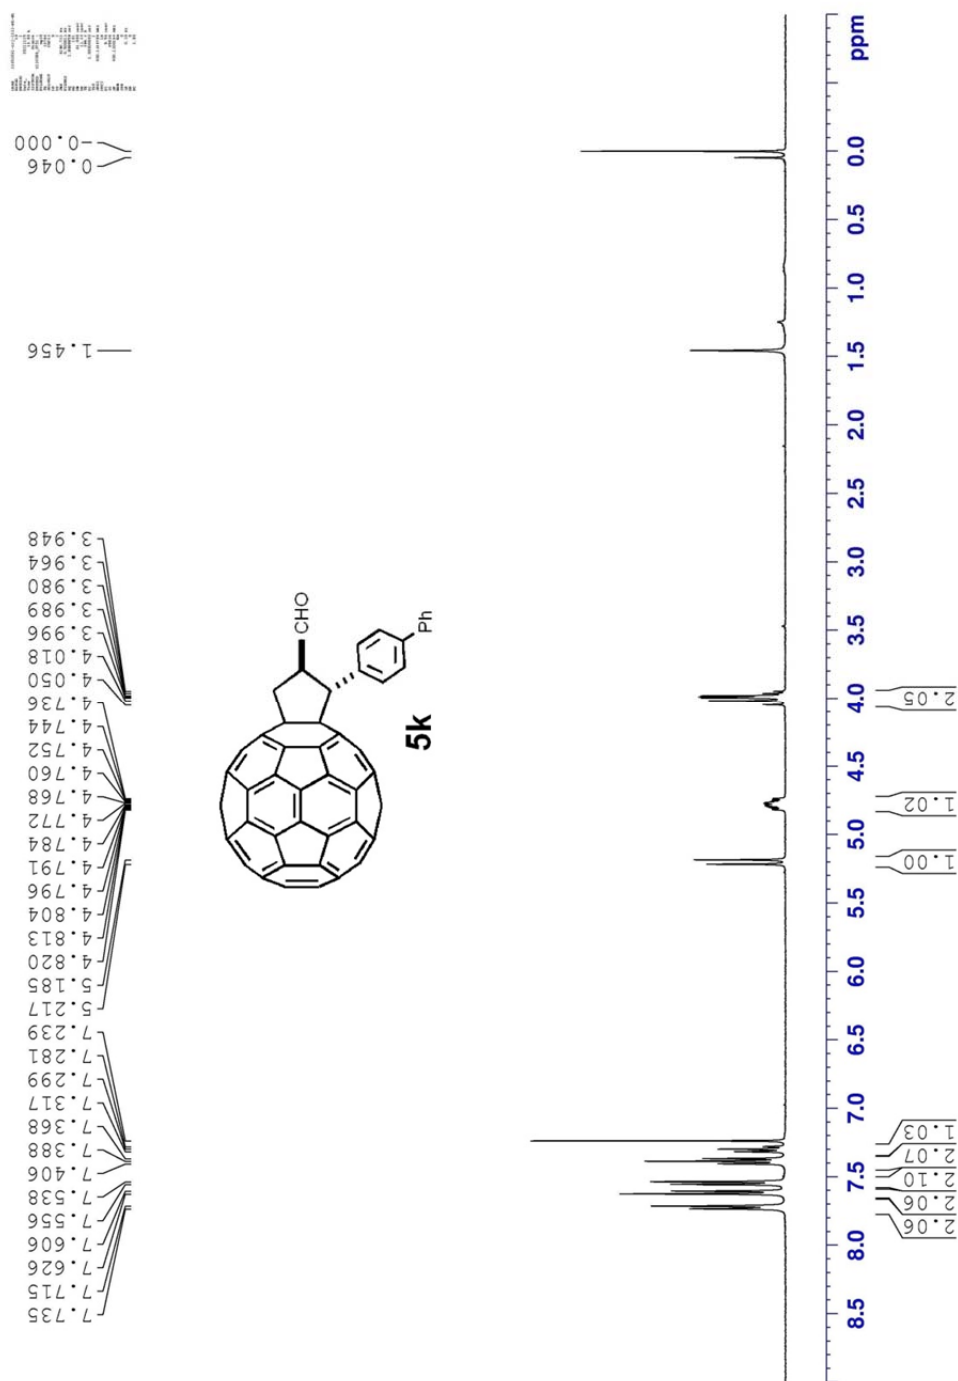

**$^{13}\text{C}$  NMR (150 MHz,  $\text{CDCl}_3/\text{CS}_2$ ) of compound 5k**

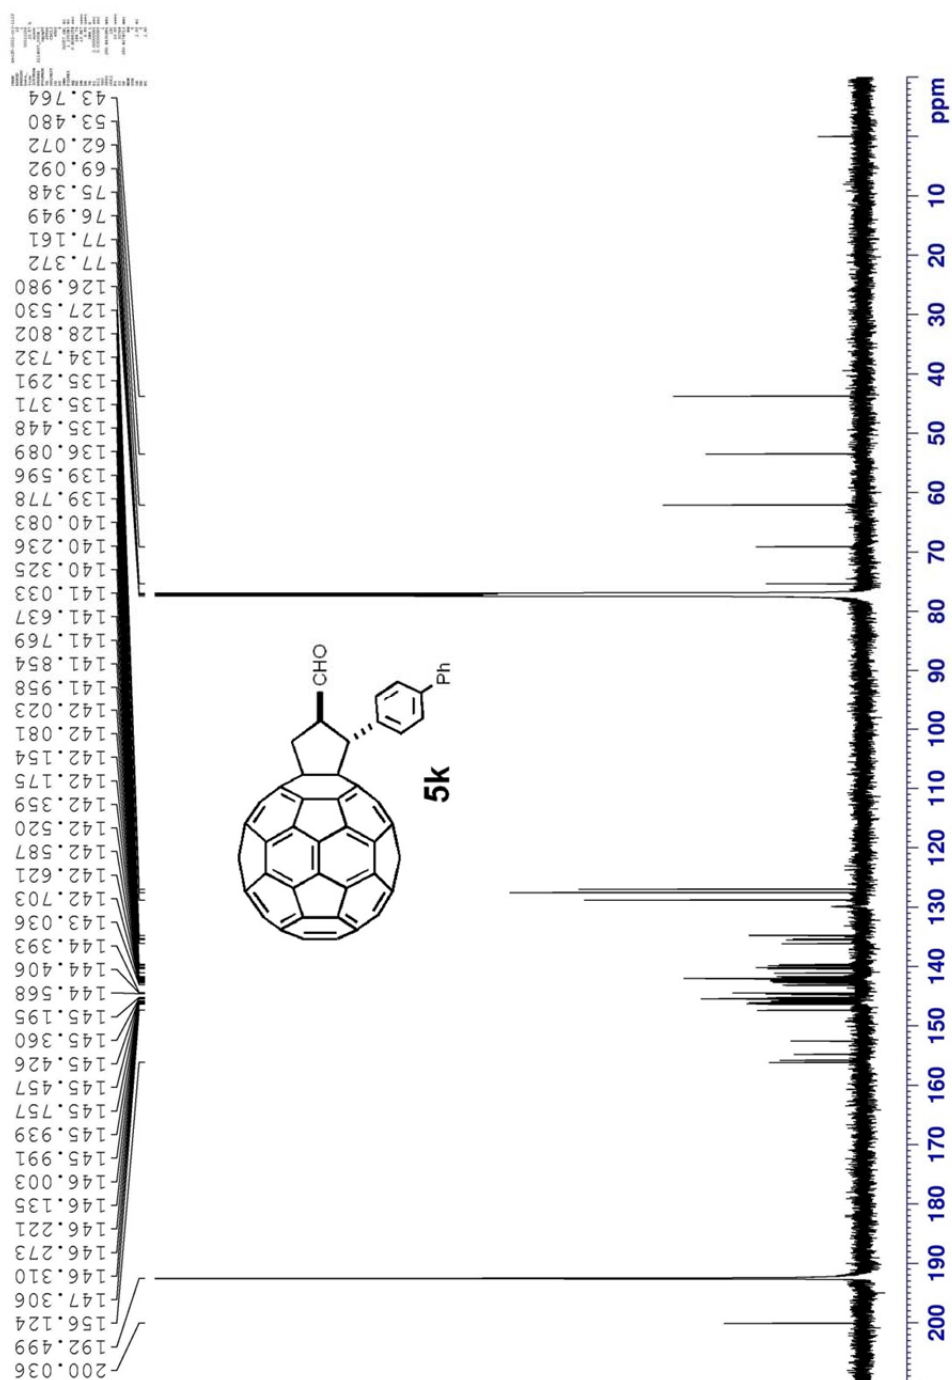

**Expanded  $^{13}\text{C}$  NMR (150 MHz,  $\text{CDCl}_3/\text{CS}_2$ ) of compound 5k**

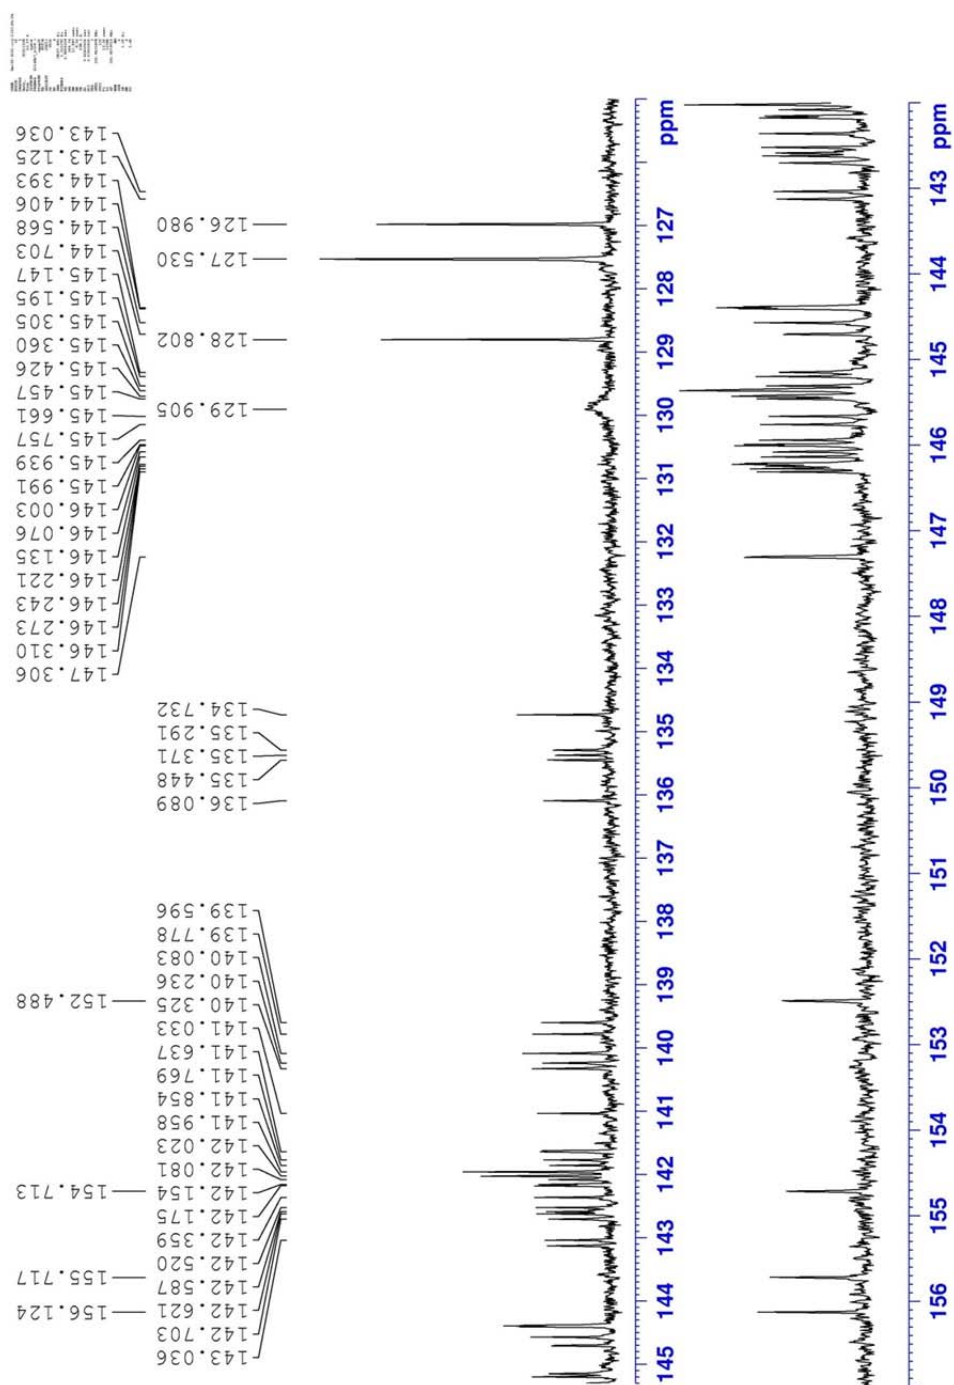

**<sup>1</sup>H NMR (400 MHz, CDCl<sub>3</sub>/CS<sub>2</sub>) of compound 5I**

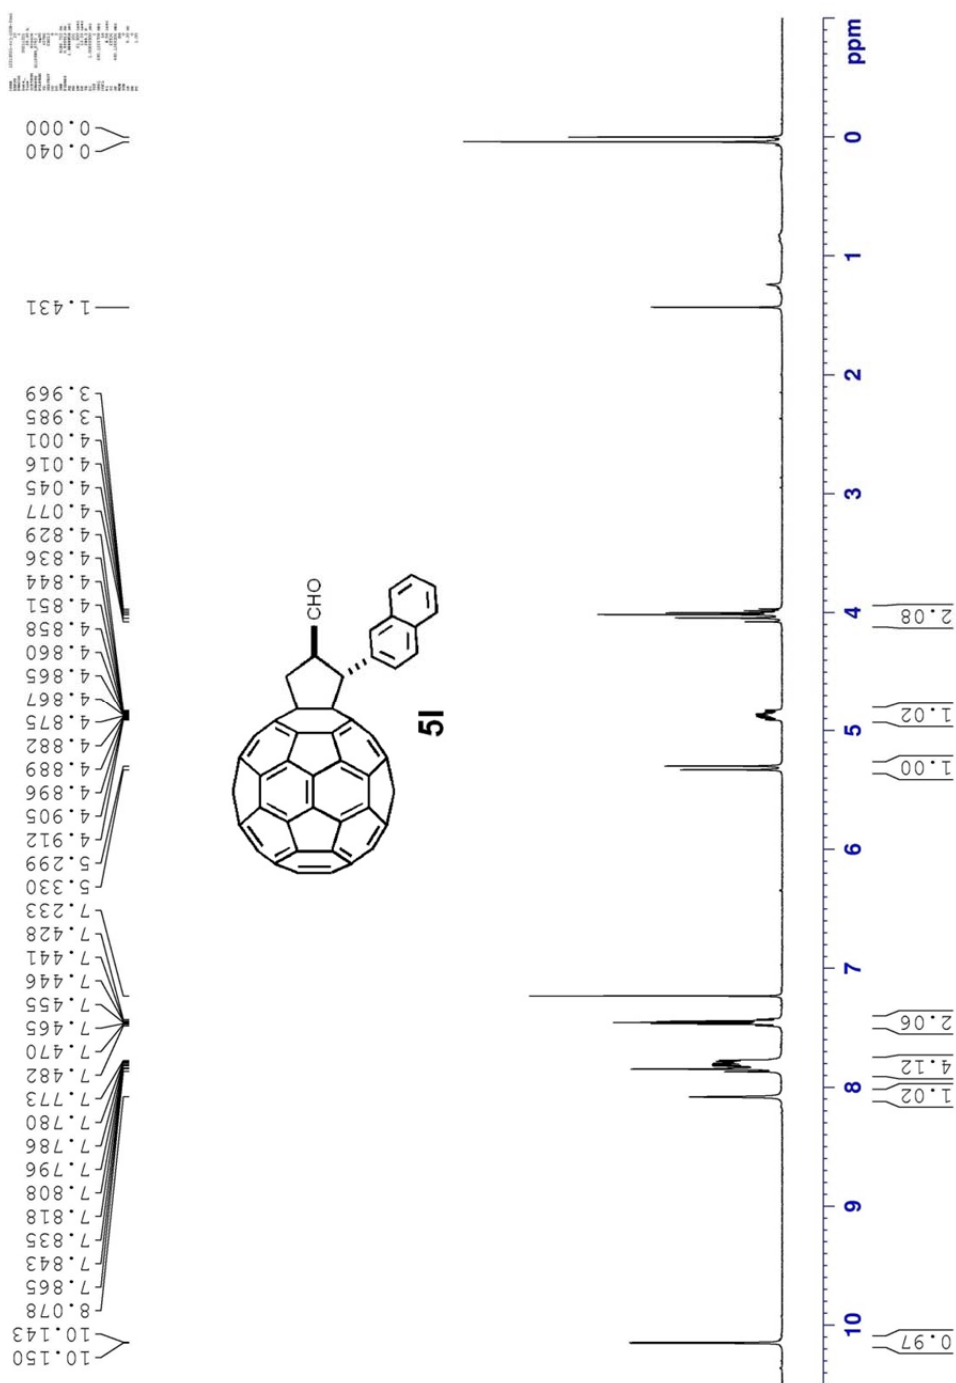

**$^{13}\text{C}$  NMR (150 MHz,  $\text{CDCl}_3/\text{CS}_2$ ) of compound 5I**

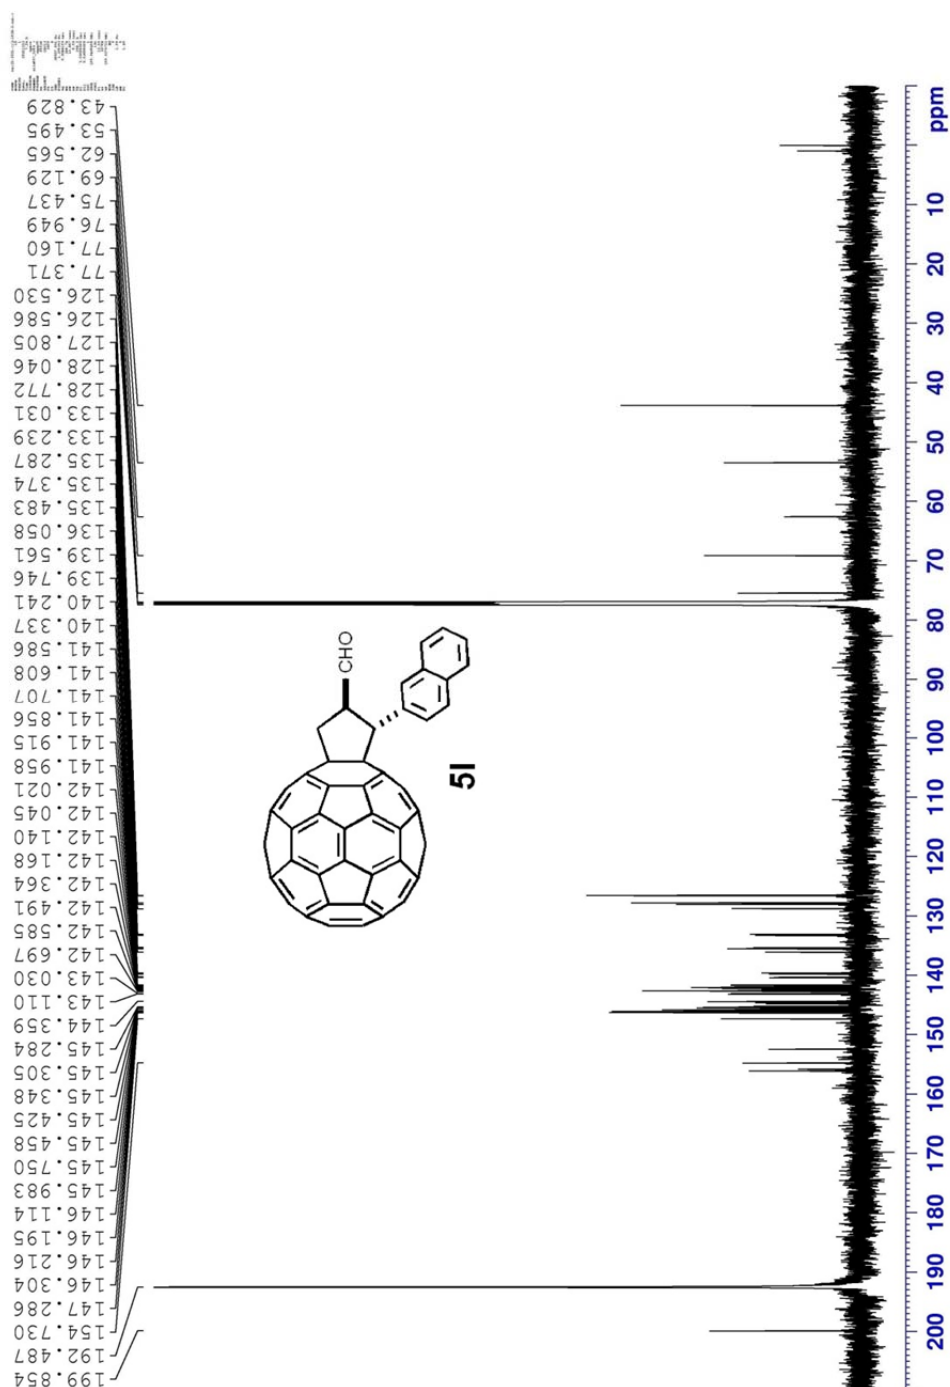

# Expanded <sup>13</sup>C NMR (150 MHz, CDCl<sub>3</sub>/CS<sub>2</sub>) of compound 5l

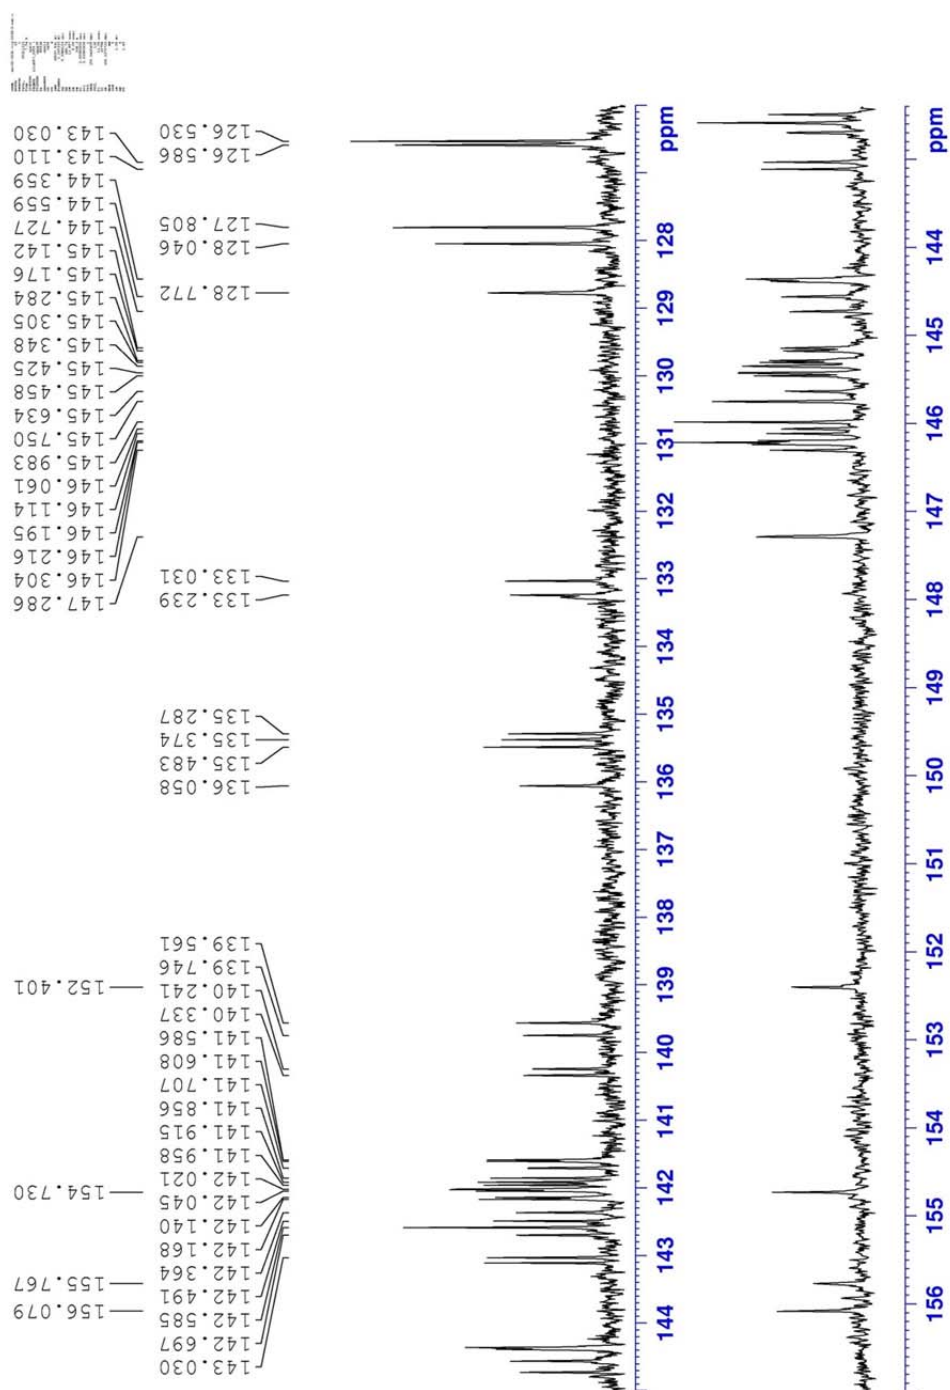

**<sup>1</sup>H NMR (400 MHz, CDCl<sub>3</sub>/CS<sub>2</sub>) of compound 6a**

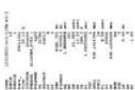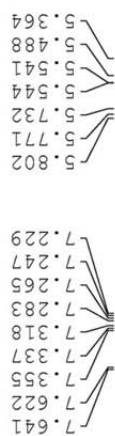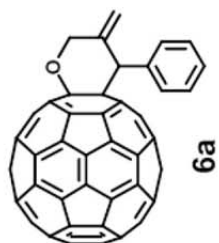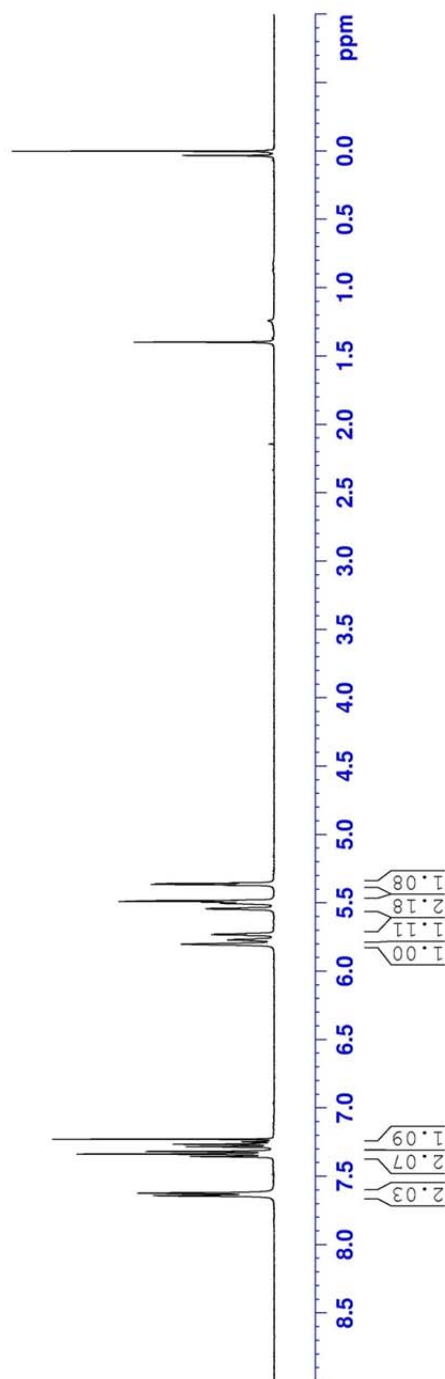

**<sup>1</sup>H NMR (400 MHz, CDCl<sub>3</sub>/CS<sub>2</sub>) of compound 6m**

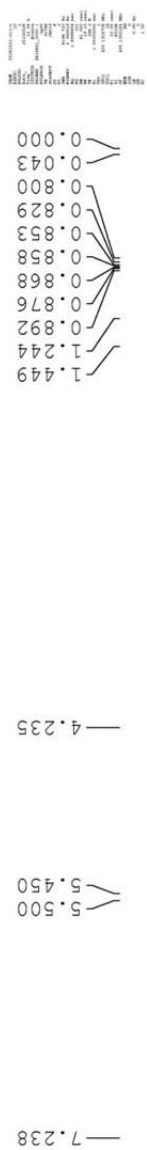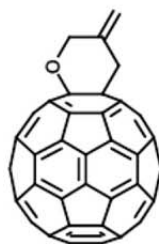

**6m**

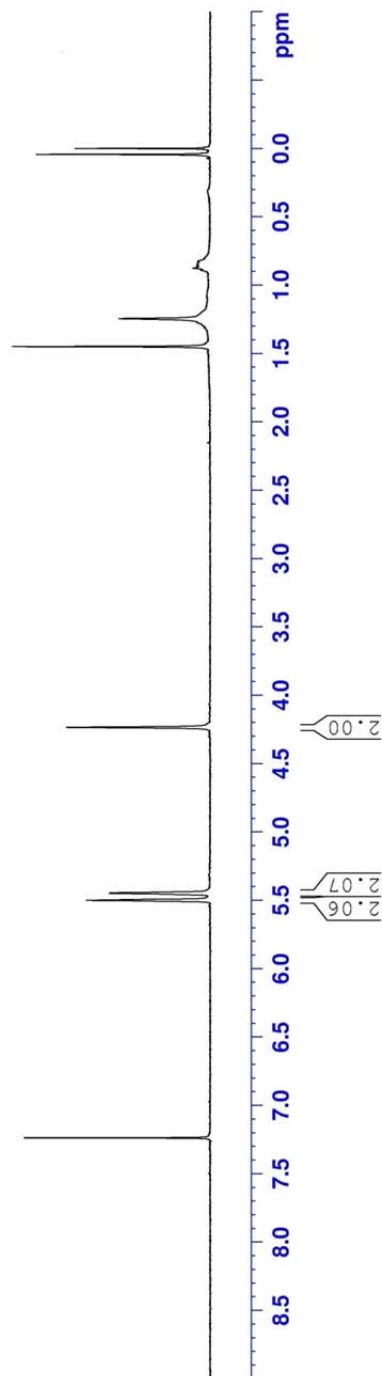

<sup>1</sup>H NMR (400 MHz, CDCl<sub>3</sub>/CS<sub>2</sub>) of compound *cis*-7g

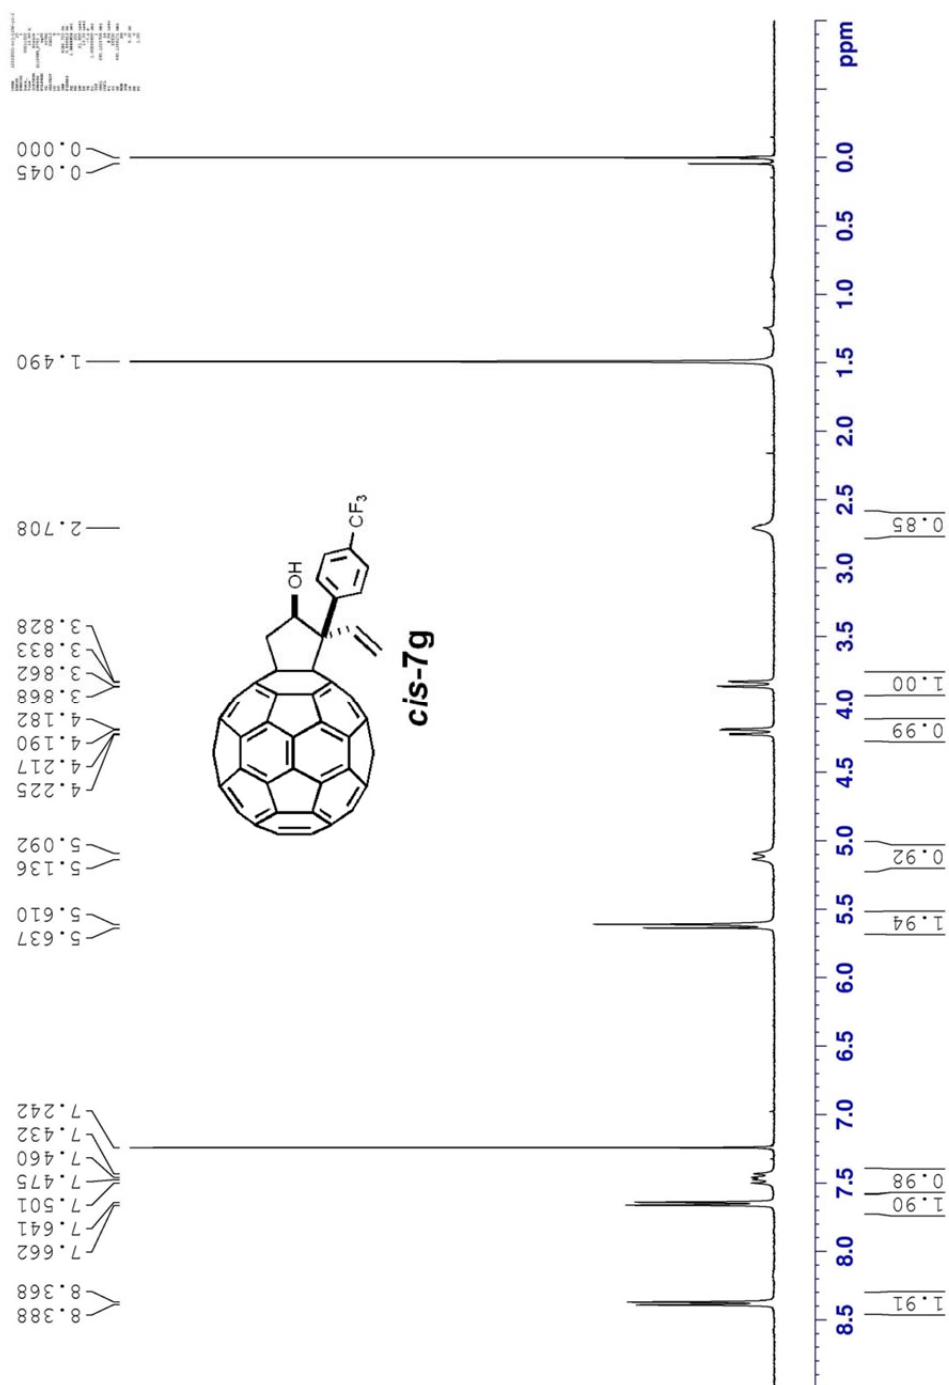

<sup>1</sup>H NMR (400 MHz, CDCl<sub>3</sub>/CS<sub>2</sub>) of compound *trans*-7g

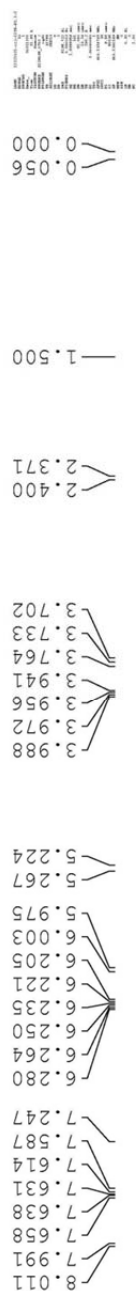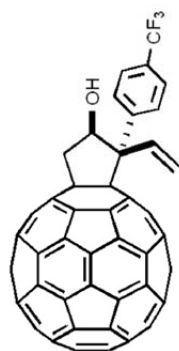

*trans*-7g

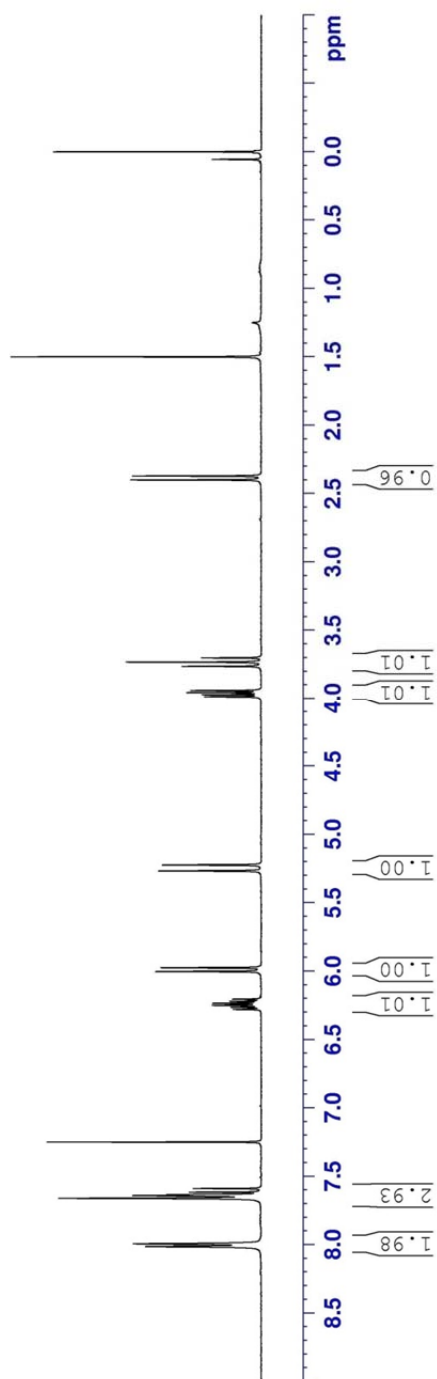

**<sup>13</sup>C NMR (150 MHz, CDCl<sub>3</sub>/CS<sub>2</sub>) of compound *trans*-7g**

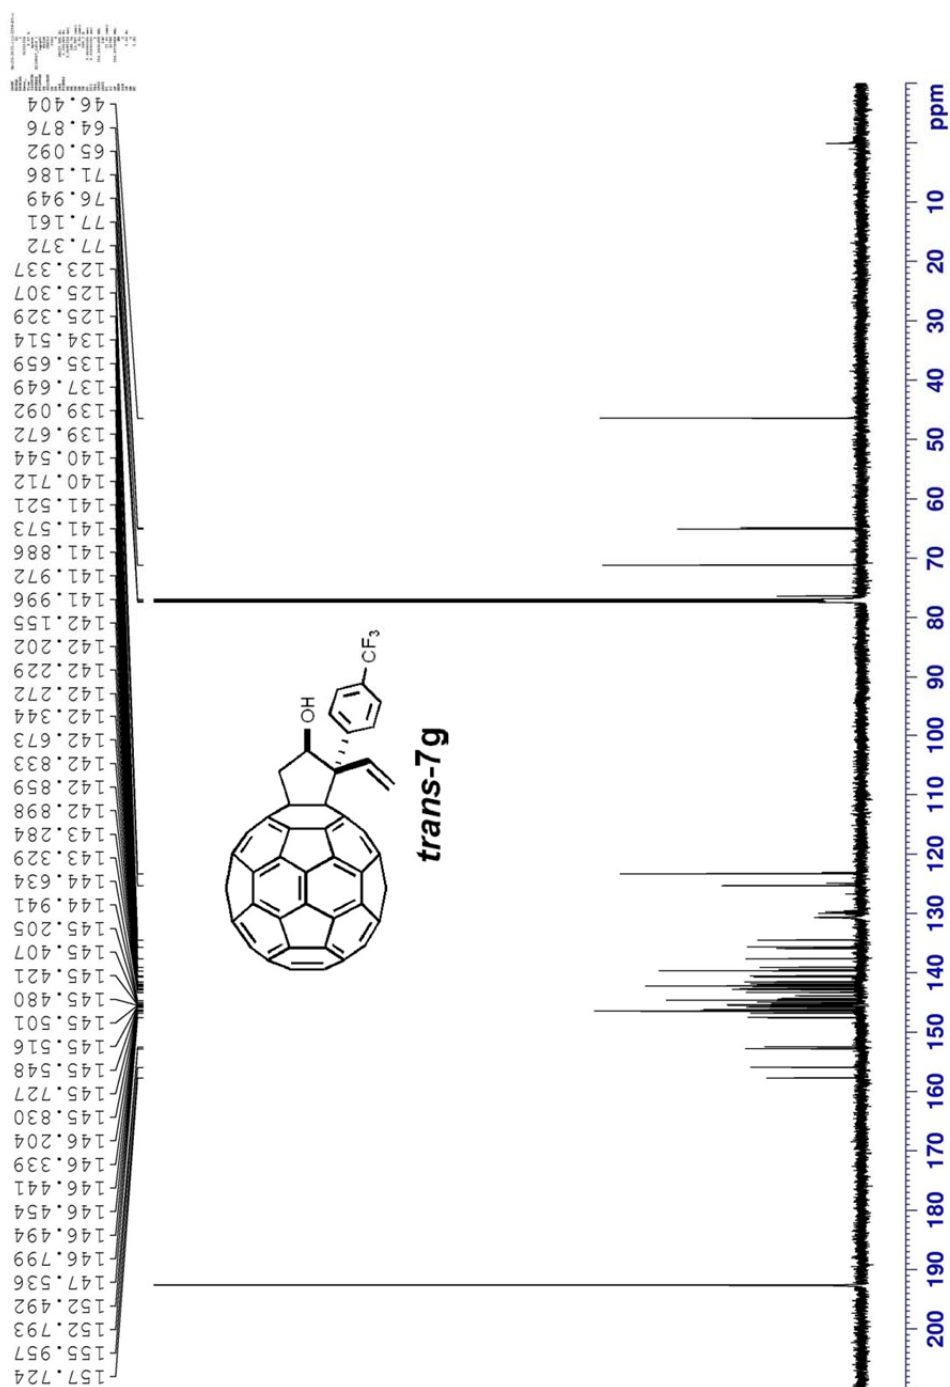

| Study | Year | Country | Sample Size (n) | Prevalence (%) | 95% CI (%) |
|-------|------|---------|-----------------|----------------|------------|
| 1     | 1998 | USA     | 1,000           | 1.2            | 0.5-2.1    |
| 2     | 2000 | USA     | 2,000           | 1.5            | 0.8-2.4    |
| 3     | 2001 | USA     | 1,500           | 1.8            | 1.0-2.8    |
| 4     | 2002 | USA     | 1,200           | 1.4            | 0.7-2.3    |
| 5     | 2003 | USA     | 1,800           | 1.6            | 0.9-2.5    |
| 6     | 2004 | USA     | 1,400           | 1.7            | 1.0-2.7    |
| 7     | 2005 | USA     | 1,600           | 1.9            | 1.1-2.9    |
| 8     | 2006 | USA     | 1,300           | 1.5            | 0.8-2.4    |
| 9     | 2007 | USA     | 1,700           | 1.8            | 1.0-2.8    |
| 10    | 2008 | USA     | 1,900           | 1.6            | 0.9-2.5    |
| 11    | 2009 | USA     | 1,100           | 1.4            | 0.7-2.3    |
| 12    | 2010 | USA     | 1,500           | 1.7            | 1.0-2.7    |
| 13    | 2011 | USA     | 1,600           | 1.9            | 1.1-2.9    |
| 14    | 2012 | USA     | 1,400           | 1.5            | 0.8-2.4    |
| 15    | 2013 | USA     | 1,700           | 1.8            | 1.0-2.8    |
| 16    | 2014 | USA     | 1,800           | 1.6            | 0.9-2.5    |
| 17    | 2015 | USA     | 1,200           | 1.4            | 0.7-2.3    |
| 18    | 2016 | USA     | 1,500           | 1.7            | 1.0-2.7    |
| 19    | 2017 | USA     | 1,600           | 1.9            | 1.1-2.9    |
| 20    | 2018 | USA     | 1,400           | 1.5            | 0.8-2.4    |
| 21    | 2019 | USA     | 1,700           | 1.8            | 1.0-2.8    |
| 22    | 2020 | USA     | 1,800           | 1.6            | 0.9-2.5    |
| 23    | 2021 | USA     | 1,200           | 1.4            | 0.7-2.3    |
| 24    | 2022 | USA     | 1,500           | 1.7            | 1.0-2.7    |
| 25    | 2023 | USA     | 1,600           | 1.9            | 1.1-2.9    |
| 26    | 2024 | USA     | 1,400           | 1.5            | 0.8-2.4    |
| 27    | 2025 | USA     | 1,700           | 1.8            | 1.0-2.8    |
| 28    | 2026 | USA     | 1,800           | 1.6            | 0.9-2.5    |
| 29    | 2027 | USA     | 1,200           | 1.4            | 0.7-2.3    |
| 30    | 2028 | USA     | 1,500           | 1.7            | 1.0-2.7    |
| 31    | 2029 | USA     | 1,600           | 1.9            | 1.1-2.9    |
| 32    | 2030 | USA     | 1,400           | 1.5            | 0.8-2.4    |
| 33    | 2031 | USA     | 1,700           | 1.8            | 1.0-2.8    |
| 34    | 2032 | USA     | 1,800           | 1.6            | 0.9-2.5    |
| 35    | 2033 | USA     | 1,200           | 1.4            | 0.7-2.3    |
| 36    | 2034 | USA     | 1,500           | 1.7            | 1.0-2.7    |
| 37    | 2035 | USA     | 1,600           | 1.9            | 1.1-2.9    |
| 38    | 2036 | USA     | 1,400           | 1.5            | 0.8-2.4    |
| 39    | 2037 | USA     | 1,700           | 1.8            | 1.0-2.8    |
| 40    | 2038 | USA     | 1,800           | 1.6            | 0.9-2.5    |
| 41    | 2039 | USA     | 1,200           | 1.4            | 0.7-2.3    |
| 42    | 2040 | USA     | 1,500           | 1.7            | 1.0-2.7    |
| 43    | 2041 | USA     | 1,600           | 1.9            | 1.1-2.9    |
| 44    | 2042 | USA     | 1,400           | 1.5            | 0.8-2.4    |
| 45    | 2043 | USA     | 1,700           | 1.8            | 1.0-2.8    |
| 46    | 2044 | USA     | 1,800           | 1.6            | 0.9-2.5    |
| 47    | 2045 | USA     | 1,200           | 1.4            | 0.7-2.3    |
| 48    | 2046 | USA     | 1,500           | 1.7            | 1.0-2.7    |
| 49    | 2047 | USA     | 1,600           | 1.9            | 1.1-2.9    |
| 50    | 2048 | USA     | 1,400           | 1.5            | 0.8-2.4    |
| 51    | 2049 | USA     | 1,700           | 1.8            | 1.0-2.8    |
| 52    | 2050 | USA     | 1,800           | 1.6            | 0.9-2.5    |
| 53    | 2051 | USA     | 1,200           | 1.4            | 0.7-2.3    |
| 54    | 2052 | USA     | 1,500           | 1.7            | 1.0-2.7    |
| 55    | 2053 | USA     | 1,600           | 1.9            | 1.1-2.9    |
| 56    | 2054 | USA     | 1,400           | 1.5            | 0.8-2.4    |
| 57    | 2055 | USA     | 1,700           | 1.8            | 1.0-2.8    |
| 58    | 2056 | USA     | 1,800           | 1.6            | 0.9-2.5    |
| 59    | 2057 | USA     | 1,200           | 1.4            | 0.7-2.3    |
| 60    | 2058 | USA     | 1,500           | 1.7            | 1.0-2.7    |
| 61    | 2059 | USA     | 1,600           | 1.9            | 1.1-2.9    |
| 62    | 2060 | USA     | 1,400           | 1.5            | 0.8-2.4    |

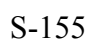

**<sup>1</sup>H NMR (400 MHz, CDCl<sub>3</sub>/CS<sub>2</sub>) of compound 8a**

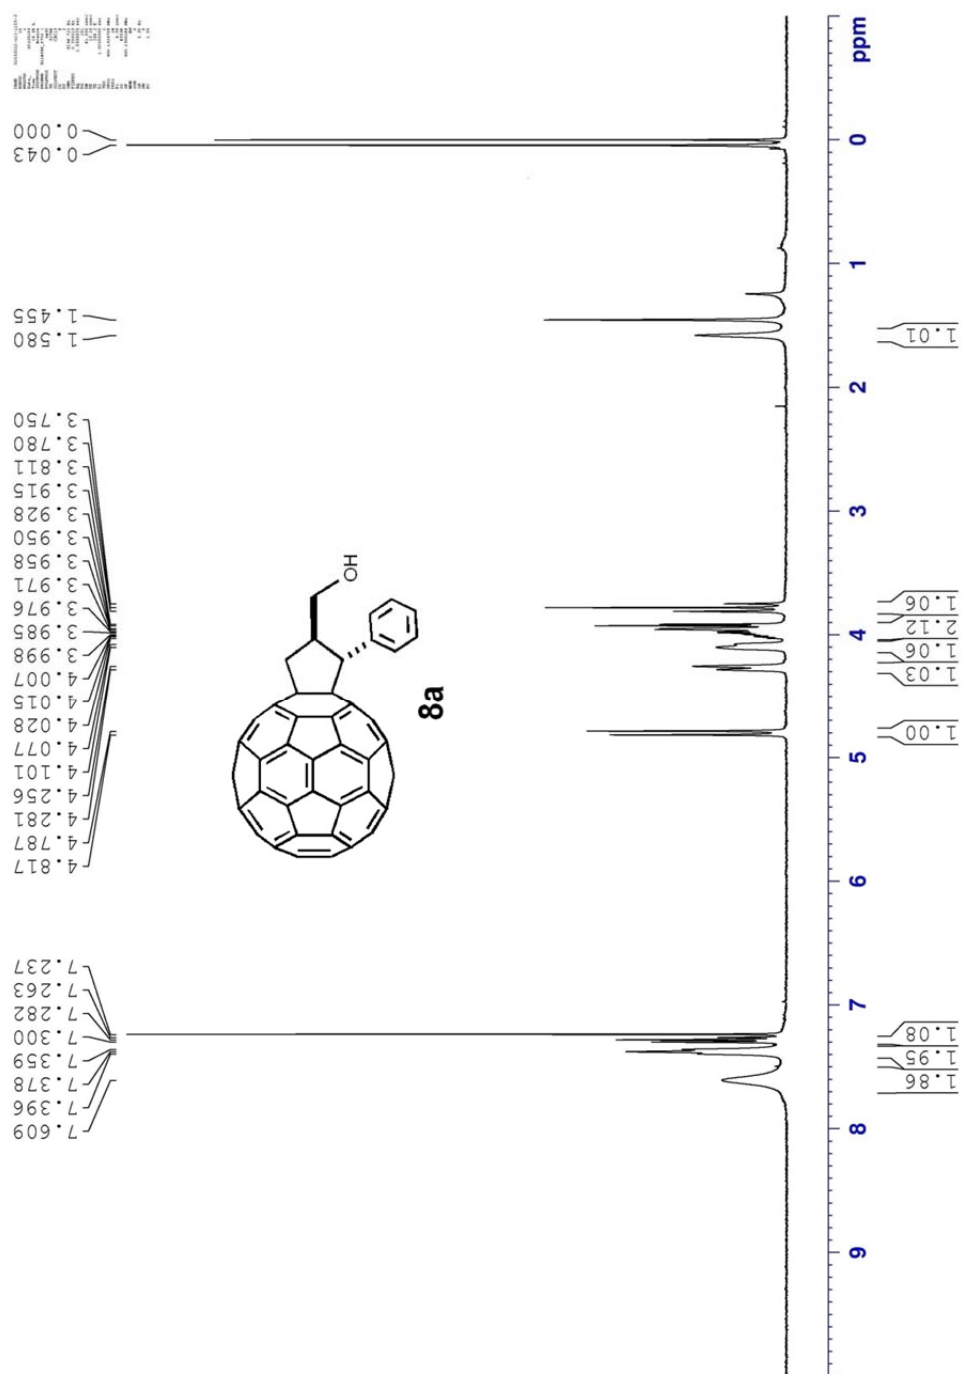

**$^{13}\text{C}$  NMR (150 MHz,  $\text{CDCl}_3/\text{CS}_2$ ) of compound **8a****

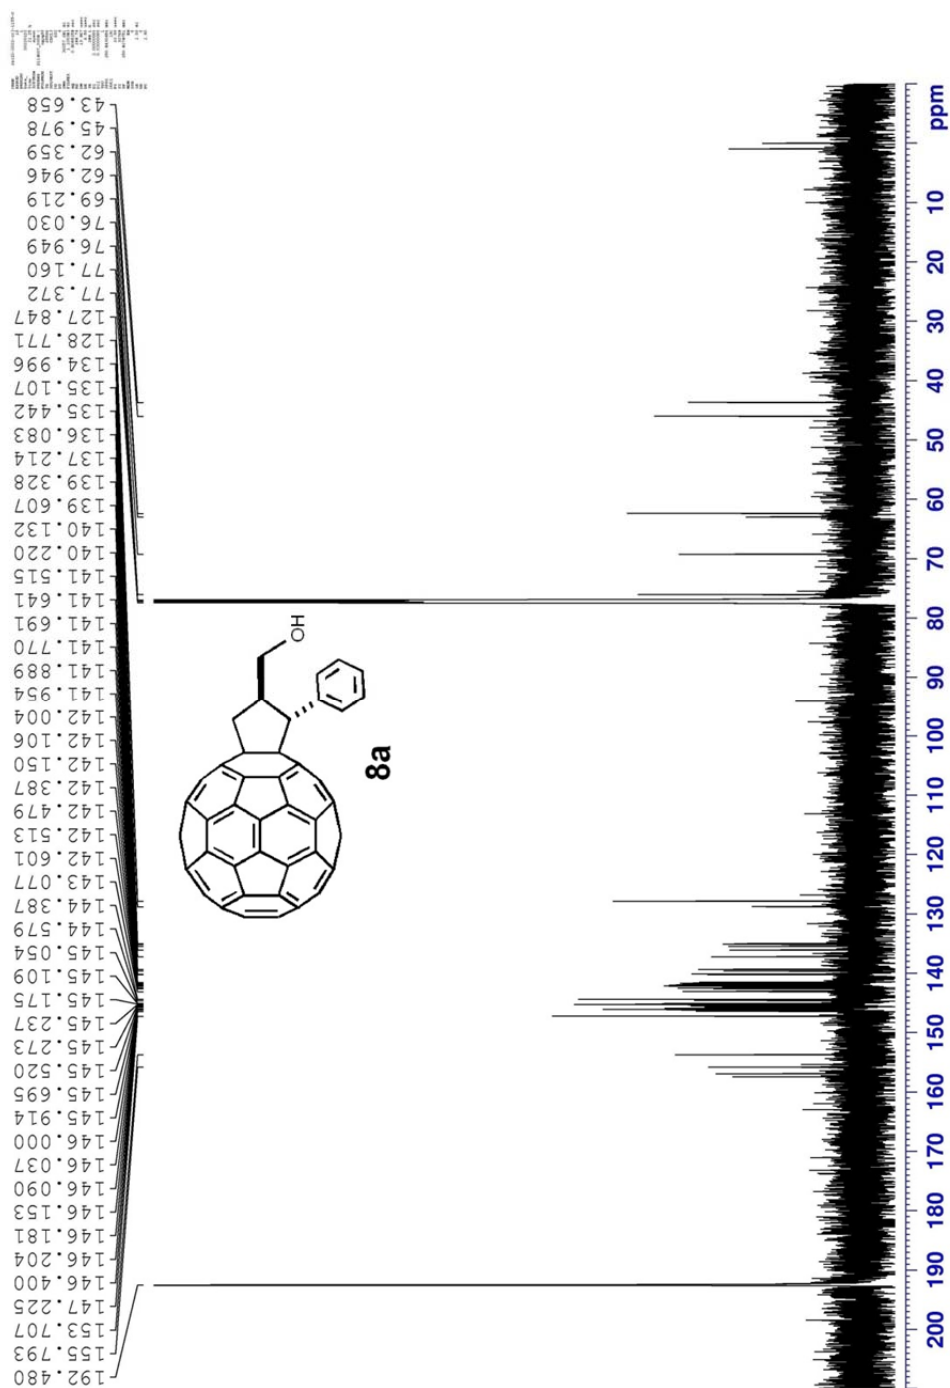

**Expanded  $^{13}\text{C}$  NMR (150 MHz,  $\text{CDCl}_3/\text{CS}_2$ ) of compound 8a**

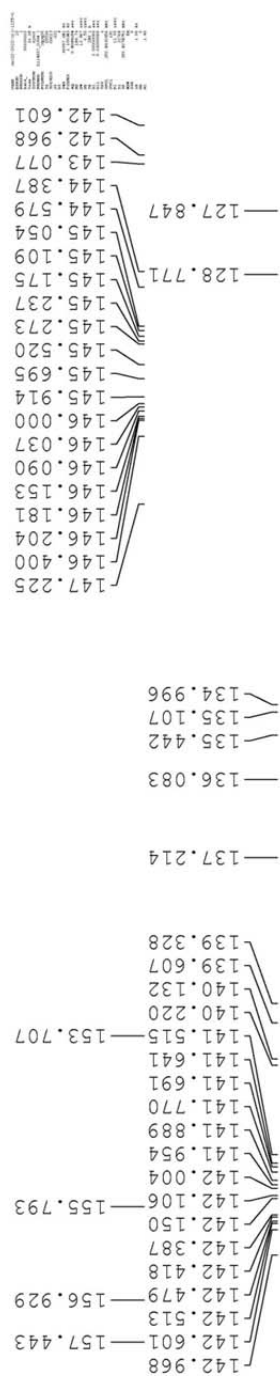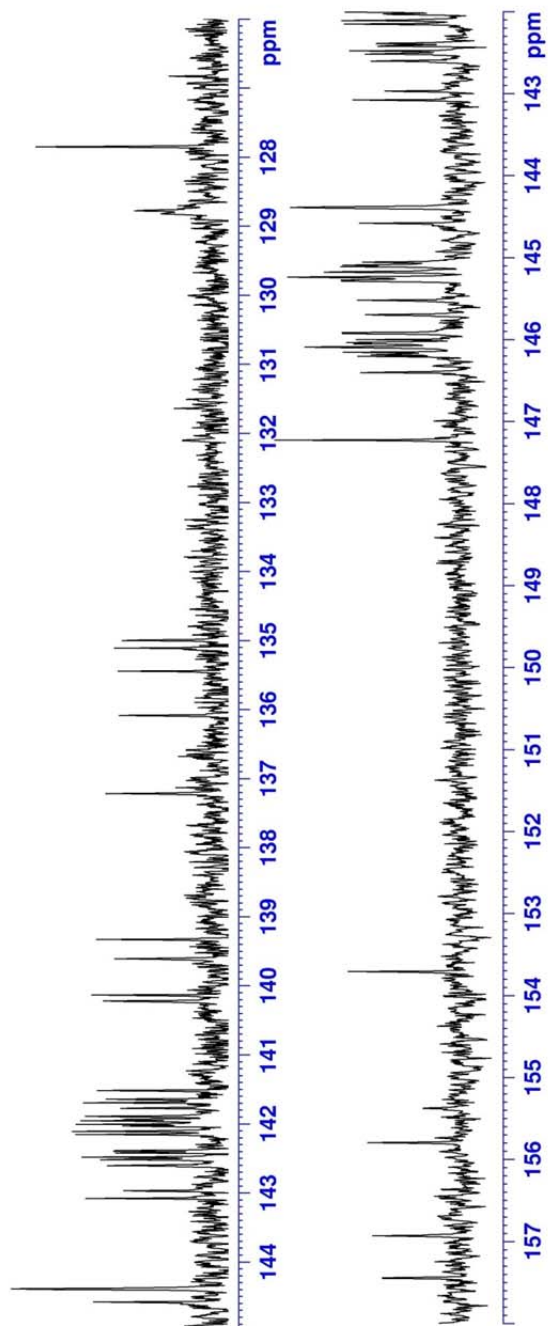

**<sup>1</sup>H NMR (400 MHz, DMSO-*d*<sub>6</sub>/CS<sub>2</sub>) of compound 9a**

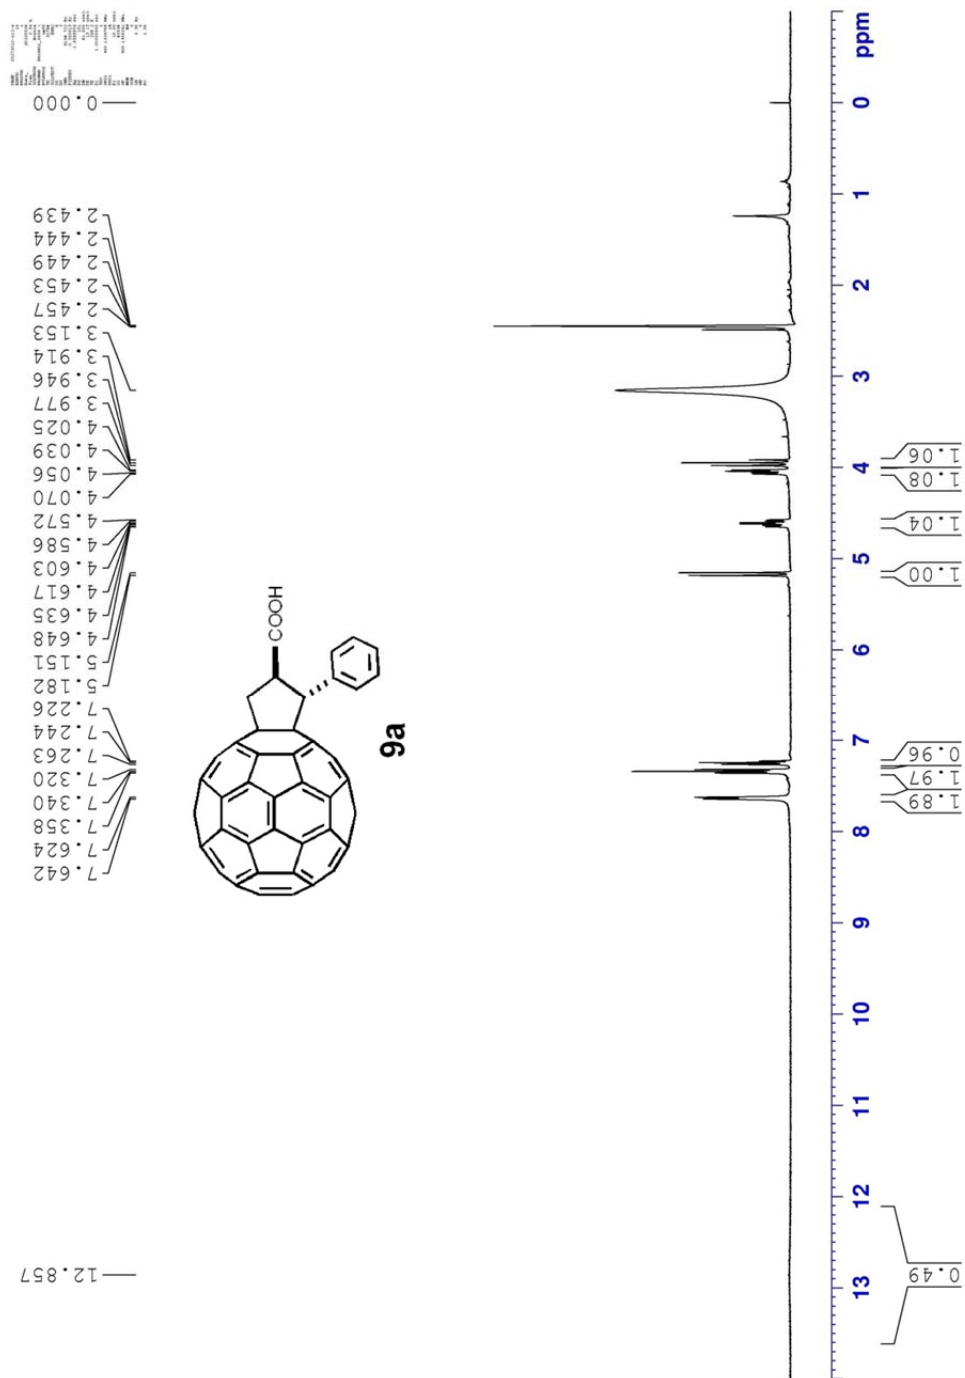

**$^{13}\text{C}$  NMR (150 MHz,  $\text{DMSO}-d_6/\text{CS}_2$ ) of compound 9a**

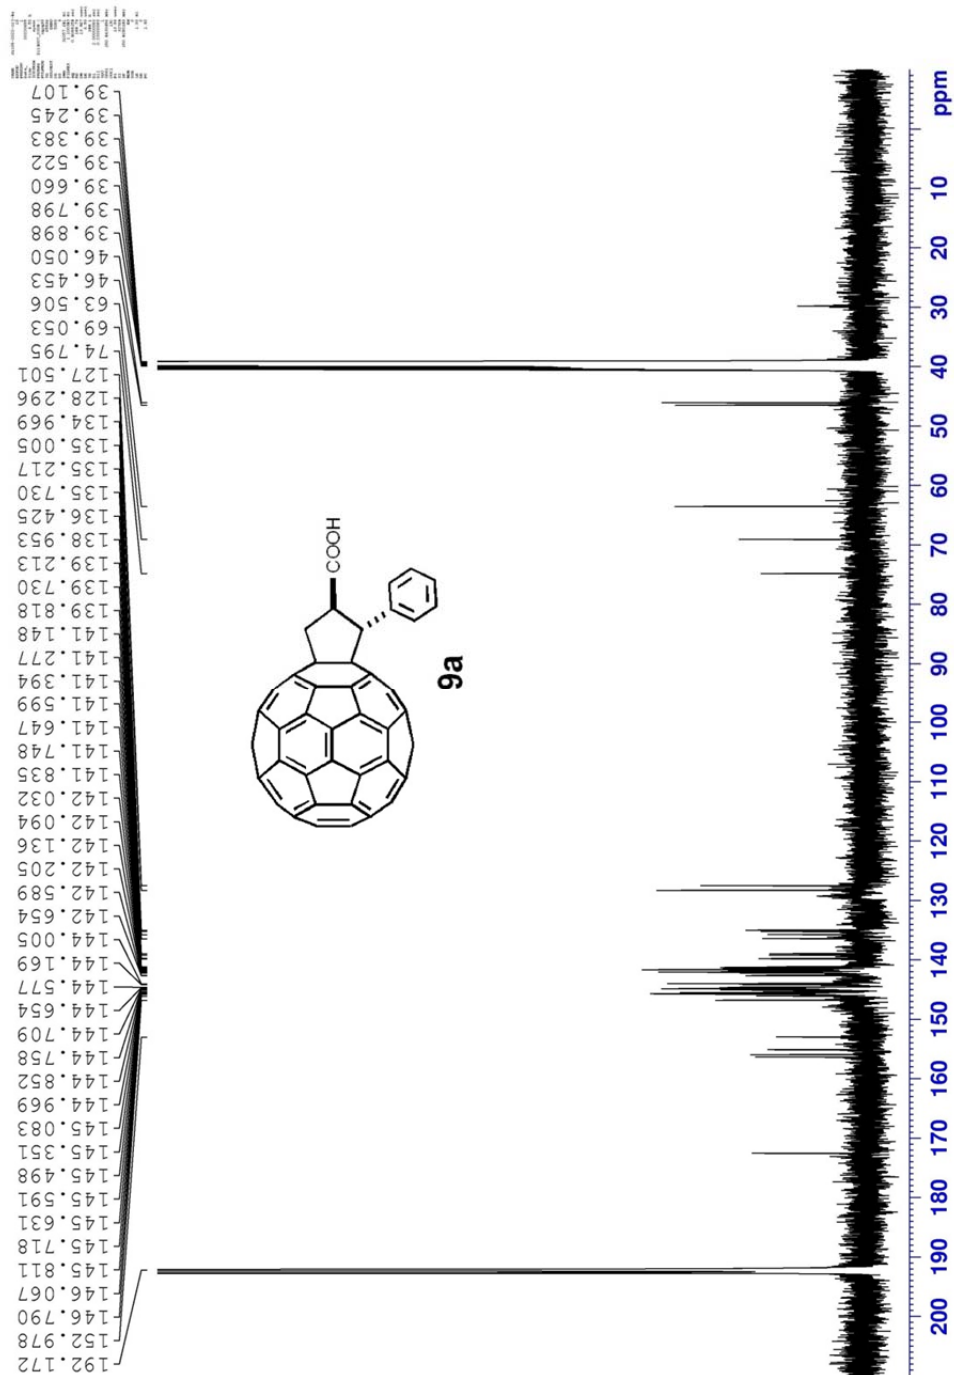

**Expanded  $^{13}\text{C}$  NMR (150 MHz,  $\text{DMSO-}d_6/\text{CS}_2$ ) of compound 9a**

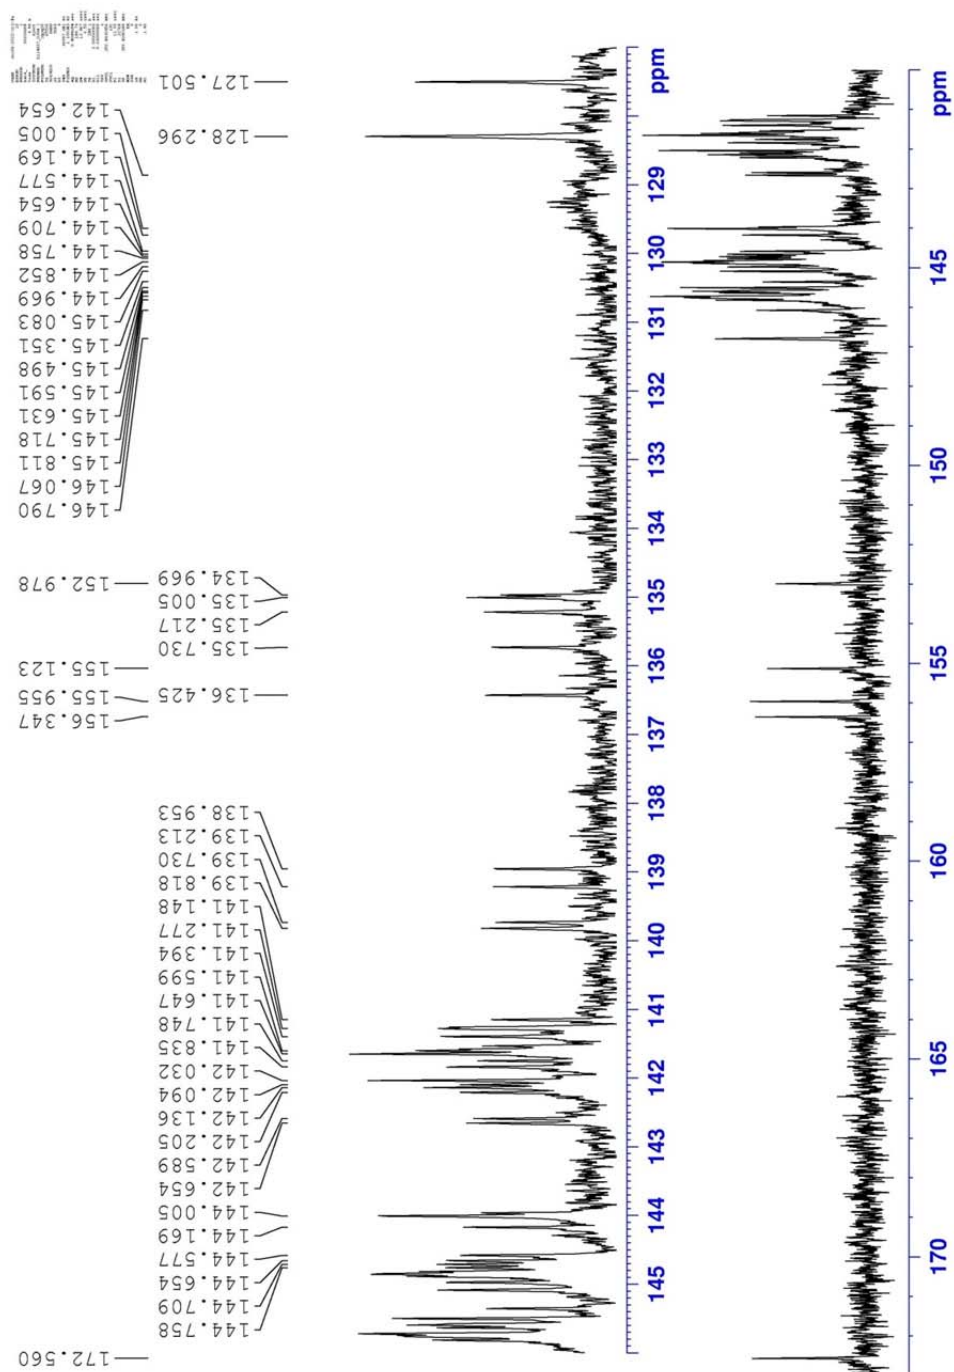

Supplement: d2qo01116f1.pdf [file d2qo01116f1.pdf]
